# Supplementary material for: Multicenter evaluation of label-free quantification in human plasma on a high dynamic range benchmark set
Source: Nat Commun. 2025 Oct 2;16:8774. doi: 10.1038/s41467-025-64501-z (PMC12491457; doi:10.1038/s41467-025-64501-z)
Supplement: Supplementary file 3 — Supplementary Data 1 [file 41467_2025_64501_MOESM3_ESM.xlsx]

## Sheet: Legend
Supplementary Data 1. Overview of LC-MS setups used in the PYE ring trial.

## Sheet: LC_MS_setups
Lab ID	Abreviation	LC	MS	Overall analysis time [min]	Gradient time [min]	Flow rate [nL/min]	Column	DIA	No. replicates	DIA - on-column load [ug]	DIA - (max.) cycle time (w/o overhead) [s]	DDA	No. replicates	DDA - on-column load [ug]	DDA settings	DDA - (max.) cycle time (w/o overhead) [s]
A	A_ulti_ex	Ultimate 3000	Exploris 480	90	50	300	IonOpticks Odyssey column, 25 cm x 75 µm, C18 1.6 µm	yes	6	0.3	2.2 s; max. inject auto - 30 MS2 scans (20 Da window)	yes	6	0.3	Top20 (centroid)	0.77
A	A_evo_ex	EvoSep	Exploris 480	48 (30 SPD)	44	220	Dr. Maisch C18 AQ, 15 cmx150 µm, 1.5 µm	yes	6	0.5	2.2 s; max. inject auto - 30 MS2 scans (20 Da window)	yes	6	0.5	Top20 (profile)	0.896
B	B_ulti_HF	Ultimate 3000	HF		90	250	Waters nanoEase M/Z HSS T3 column, 25 cm x 75 µm, C18 1.8 µm, 100 Å	yes	6		37 MS2 scans (var. window)	yes	6		Top 10 (profile)
B	B_ulti_HFX	Ultimate 3000	HFX		90	250	Waters nanoEase M/Z HSS T3 column, 25 cm x 75 µm, C18 1.8 µm, 100 Å	yes	6		37 MS2 scans (var. window)	yes	6		Top 15 (profile)	0.78
C	C_nE_tTOF	nanoElute	timsTOF		70	300	self-packed, ReproSil-Pur 120 C18-AQ resin, Dr Maisch, 15 cm x 75 µm, 1.9 µm	yes	6		1.4s	yes	6		Top10	1.1s
D	D_ulti_ecl	Ultimate 3000	Orbitrap Eclipse	80	60	300	self-packed, ReproSil Gold C18-AQ, Dr. Maisch, 40 mm × 75 μm, 3 μm	yes	6	0.3	40 MS2 scans (var window width)	yes	6	0.3	Fixed cycle time	2
D	D_Vanq_ex	Vanquish Neo (MF)	Exploris 480	62	60	50000	Thermo Acclaim PepMap 100 C18 column, 15 cm × 1 mm ID, 2 μm, 100 Å	yes	6	10	1.54s - 40 MS2 scans (22.5 Da)	yes	5	10	Fixed cycle time	1.2
E	E_ulti_lumos	Ultimate 3000	Fusion Lumos	80	60	300	self-packed, ReproSil Gold C18-AQ, Dr. Maisch, 40 mm × 75 μm, 3 μm	yes	6	0.3	All control 40 windows a 30000 resolution (~1.2 sec) - 40 MS2 scans (var window width)	yes	6	0.3	Top20	0.49
E	E_Vanq_ex	Vanquish Neo (MF)	Exploris 480	62	60	50000	Thermo Acclaim PepMap 100 C18 column, 15 cm × 1 mm ID, 2 μm, 100 Å	yes	5	10	1.54 s - 40 MS2 scans (22.5 Da)	yes	5	10	Fixed cycle time	1.2
F	f_Vanq_ecl	Vanquish Neo (MF)	Orbitrap Eclipse	67	60	50000	Thermo Acclaim PepMap 100 C18 column, 15 cm × 1 mm ID, 2 μm, 100 Å					yes	6	9	Fixed cycle time	1.5
G	G_nLC_tTOF	Easy nLC 1200	timsTOF	40 (w/o equilibration)	30	300	IonOpticks Aurora column, 25 cm x 75 µm, C18 1.6 μm, CSI	yes	6	0.2	1.26 s	yes	6	0.2	PASEF- 10 PASEF scans	1.16
G	G_ulti_ex	Ultimate 3000	Exploris 480	60	48	300	Waters BEH columns 186008795	yes	6	1	2.11 s - 31 MS2 scans (var window width)	yes	6	1	Fixed cycle time	1
H	H_ulti_ecl	Ultimate 3000	Orbitrap Eclipse	141	120	300	self-packed, Reprosil-Pur 120 C18-AQ resin, Dr Maisch, 30 cm x 100 µm, 1.9 µm	yes	6	0.66	3s - 55 w (var window width)	yes	6	0.66	Fixed cycle time	3
H	H_ulti_ex	Ultimate 3000	Exploris 480	120	102	300	Waters BEH columns 186008795	yes	6	0.66	3.27 s - 48 w (var window width)?	yes	6	0.66	Fixed cycle time	2
I	I_nLC_ex	Easy nLC 1200	Exploris 480		44	250	self-packed, C18-AQ 1.9 µm beads Dr. Maisch Reprosil-Pur 120, 20 cm x 75 µm,1.9 µm	yes	6		>2.16 - 40 MS2 scans (var window width)
J	J_nLC_tTOF	Easy nLC 1200	timsTOF	100	44	250	self-packed, C18-AQ 1.9 µm beads Dr. Maisch Reprosil-Pur 120, 20 cm x 75 µm,1.9 µm	yes	3	0.1	1.7s - 100 ms (16 PASEF scans, 32 x 26 Da)
K	K_Mclass_zTOF	M-Class	ZenoTOF	30	20	5000	Waters nanoEase M/Z HSS T3 C18 column, 0.3 x 150 mm, 1.8 µm, 100 Å	yes	6	0.2 and 0.5
L	L_nE_tTOF	nanoElute	timsTOF	41	35.5	850	Bruker PepSep C18 column, 25 cm x 150 µm, 1.5 µm	yes	3	0.25	1.7 s
L	L_nAcqu_tTOF	nanoAcquitiy	timsTOF	14	11	2000	IonOpticks Aurora column, 5 cm x 150 μm, C18 1.6 μm, CSI	yes	3	0.25	0.84 s
L	L_ulti_ex_FAIMS	Ultimate 3000	Exploris 480 FAIMS	40	29	300	Waters nanoEase M/Z HSS-T3 C18 100 mm x 100 μm, 1.8 μm	yes	3	0.15	1.6 s
L	L_ulti_ex	Ultimate 3000	Exploris 480	40	29	300	Waters nanoEase M/Z HSS-T3 C18 100 mm x 100 μm, 1.8 μm	yes	3	0.15	1.54s

## Sheet: summary overview
LC-MS setup	Count		LC only	Count		MS only	Count
ulti_ex	8		Ultimate 3000	18		Exploris	15
ulti_ecl	4		Vanquish Neo (MF)	5		timsTOF	7
Vanq_ex	4		Easy nLC 1200	4		Orbitrap Eclipse	5
nE_tTOF	3		nanoElute	3		HF	2
nLC_tTOF	3		EvoSep	2		HFX	2
evo_ex	2		M-Class	1		Fusion Lumos	2
ulti_HF	2		nanoAcquitiy	1		ZenoTOF	1
ulti_HFX	2
ulti_lumos	2		Sum	34		Sum	34
Vanq_ecl	1
nLC_ex	1
Mclass_zTOF	1
nAcqu_tTOF	1
Sum	34
