# Supplementary material for: Multicenter evaluation of label-free quantification in human plasma on a high dynamic range benchmark set
Source: Nat Commun. 2025 Oct 2;16:8774. doi: 10.1038/s41467-025-64501-z (PMC12491457; doi:10.1038/s41467-025-64501-z)
Supplement: Supplementary file 5 — Supplementary Data 3 [file 41467_2025_64501_MOESM5_ESM.xlsx]

## Sheet: Legend
Supplementary Data 3. Numbers of identified proteins for each experimental LC-MS setup in PYE1, PYE3 and PYE9 split by species, i.e., human, yeast and E. coli.

## Sheet: E.coli_DDA
Species	Aquisition Mode	Lab.Setup	Number of identified proteins			PYE1 vs PYE3	PYE3 vs PYE9
			PYE1	PYE3	PYE9	Ratio protein IDs (PYE1/PYE3)	Ratio protein IDs (PYE3/PYE9)
E. coli	DDA	A_evo_ex	669	394	186	1.69797	2.11828
E. coli	DDA	A_ulti_ex	833	481	217	1.73181	2.21659
E. coli	DDA	B_ulti_HF	413	179	54	2.30726	3.31481
E. coli	DDA	B_ulti_HFX	674	357	163	1.88796	2.19018
E. coli	DDA	C_nE_tTOF	761	435	195	1.74943	2.23077
E. coli	DDA	D_Vanq_ex	633	283	97	2.23675	2.91753
E. coli	DDA	D_ulti_ecl	607	321	131	1.89097	2.45038
E. coli	DDA	E_Vanq_ex	678	361	129	1.87812	2.79845
E. coli	DDA	E_ulti_lumos	651	381	120	1.70866	3.175
E. coli	DDA	F_Vanq_ecl	848	495	238	1.71313	2.07983
E. coli	DDA	G_nLC_tTOF	1095	713	456	1.53576	1.5636
E. coli	DDA	G_ulti_ex	867	499	255	1.73747	1.95686
E. coli	DDA	H_ulti_ecl	693	412	190	1.68204	2.16842
E. coli	DDA	H_ulti_ex	1038	621	305	1.6715	2.03607

## Sheet: yeast_DDA
Species	Aquisition Mode	Lab.Setup	Number of identified proteins			PYE1 vs PYE3	PYE3 vs PYE9
			PYE1	PYE3	PYE9	Ratio protein IDs (PYE1/PYE3)	Ratio protein IDs (PYE3/PYE9)
yeast	DDA	A_evo_ex	800	465	224	1.72043	2.07589
yeast	DDA	A_ulti_ex	982	569	240	1.72583	2.37083
yeast	DDA	B_ulti_HF	487	205	67	2.37561	3.0597
yeast	DDA	B_ulti_HFX	800	422	180	1.89573	2.34444
yeast	DDA	C_nE_tTOF	907	497	236	1.82495	2.10593
yeast	DDA	D_Vanq_ex	780	344	119	2.26744	2.89076
yeast	DDA	D_ulti_ecl	736	373	151	1.97319	2.4702
yeast	DDA	E_Vanq_ex	785	427	154	1.83841	2.77273
yeast	DDA	E_ulti_lumos	767	396	157	1.93687	2.52229
yeast	DDA	F_Vanq_ecl	1056	637	282	1.65777	2.25887
yeast	DDA	G_nLC_tTOF	1548	904	565	1.71239	1.6
yeast	DDA	G_ulti_ex	1079	634	298	1.70189	2.12752
yeast	DDA	H_ulti_ecl	816	471	229	1.73248	2.05677
yeast	DDA	H_ulti_ex	1365	762	366	1.79134	2.08197

## Sheet: human_DDA
Species	Aquisition Mode	Lab.Setup	Number of identified proteins			PYE1 vs PYE3	PYE3 vs PYE9
			PYE1	PYE3	PYE9	Ratio protein IDs (PYE1/PYE3)	Ratio protein IDs (PYE3/PYE9)
human	DDA	A_evo_ex	150	151	156	0.993377	0.967949
human	DDA	A_ulti_ex	175	186	187	0.94086	0.994652
human	DDA	B_ulti_HF	108	106	101	1.01887	1.0495
human	DDA	B_ulti_HFX	189	187	186	1.0107	1.00538
human	DDA	C_nE_tTOF	173	188	182	0.920213	1.03297
human	DDA	D_Vanq_ex	134	136	126	0.985294	1.07937
human	DDA	D_ulti_ecl	158	150	154	1.05333	0.974026
human	DDA	E_Vanq_ex	150	144	138	1.04167	1.04348
human	DDA	E_ulti_lumos	154	147	140	1.04762	1.05
human	DDA	F_Vanq_ecl	165	166	178	0.993976	0.932584
human	DDA	G_nLC_tTOF	246	226	279	1.0885	0.810036
human	DDA	G_ulti_ex	182	176	172	1.03409	1.02326
human	DDA	H_ulti_ecl	149	155	156	0.96129	0.99359
human	DDA	H_ulti_ex	200	210	195	0.952381	1.07692

## Sheet: E.coli_DIA
Species	Aquisition Mode	Lab.Setup	Number of identified proteins			PYE1 vs PYE3	PYE3 vs PYE9
			PYE1	PYE3	PYE9	Ratio protein IDs (PYE1/PYE3)	Ratio protein IDs (PYE3/PYE9)
E. coli	DIA	A_evo_ex	1274	856	475	1.48832	1.80211
E. coli	DIA	A_ulti_ex	1492	1061	591	1.40622	1.79526
E. coli	DIA	B_ulti_HF	898	507	192	1.7712	2.64062
E. coli	DIA	B_ulti_HFX	1058	613	292	1.72594	2.09932
E. coli	DIA	C_nE_tTOF	1287	829	433	1.55247	1.91455
E. coli	DIA	D_ulti_ecl	1268	804	453	1.57711	1.77483
E. coli	DIA	D_Vanq_ex	997	571	286	1.74606	1.9965
E. coli	DIA	E_ulti_lumos	1360	963	559	1.41225	1.72272
E. coli	DIA	E_Vanq_ex	935	541	247	1.72828	2.19028
E. coli	DIA	G_nLC_tTOF	1614	1218	749	1.32512	1.62617
E. coli	DIA	G_ulti_ex	1362	984	599	1.38415	1.64274
E. coli	DIA	H_ulti_ecl	1618	1194	716	1.35511	1.6676
E. coli	DIA	H_ulti_ex	1663	1241	779	1.34005	1.59307
E. coli	DIA	I_nLC_ex	1573	1194	719	1.31742	1.66064
E. coli	DIA	J_nLC_tTOF	1181	768	423	1.53776	1.8156
E. coli	DIA	K_Mclass_zTOF	1364	964	549	1.41494	1.75592
E. coli	DIA	L_nAcqu_tTOF	754	398	163	1.89447	2.44172
E. coli	DIA	L_nE_tTOF	1141	648	383	1.7608	1.69191
E. coli	DIA	L_ulti_ex	734	355	152	2.06761	2.33553
E. coli	DIA	L_ulti_ex_FAIMS	674	304	184	2.21711	1.65217

## Sheet: yeast_DIA
Species	Aquisition Mode	Lab.Setup	Number of identified proteins			PYE1 vs PYE3	PYE3 vs PYE9
			PYE1	PYE3	PYE9	Ratio protein IDs (PYE1/PYE3)	Ratio protein IDs (PYE3/PYE9)
yeast	DIA	A_evo_ex	1748	1105	599	1.5819	1.84474
yeast	DIA	A_ulti_ex	2183	1411	704	1.54713	2.00426
yeast	DIA	B_ulti_HF	1095	627	202	1.74641	3.10396
yeast	DIA	B_ulti_HFX	1365	733	333	1.86221	2.2012
yeast	DIA	C_nE_tTOF	1790	1039	497	1.72281	2.09054
yeast	DIA	D_ulti_ecl	1792	1043	510	1.71812	2.0451
yeast	DIA	D_Vanq_ex	1257	683	331	1.84041	2.06344
yeast	DIA	E_ulti_lumos	2010	1229	673	1.63548	1.82615
yeast	DIA	E_Vanq_ex	1146	625	284	1.8336	2.2007
yeast	DIA	G_nLC_tTOF	2530	1742	900	1.45235	1.93556
yeast	DIA	G_ulti_ex	2091	1308	734	1.59862	1.78202
yeast	DIA	H_ulti_ecl	2527	1651	890	1.53059	1.85506
yeast	DIA	H_ulti_ex	2579	1695	934	1.52153	1.81478
yeast	DIA	I_nLC_ex	2402	1605	872	1.49657	1.8406
yeast	DIA	J_nLC_tTOF	1651	970	512	1.70206	1.89453
yeast	DIA	K_Mclass_zTOF	1943	1199	635	1.62052	1.88819
yeast	DIA	L_nAcqu_tTOF	450	195	55	2.30769	3.54545
yeast	DIA	L_nE_tTOF	1474	840	404	1.75476	2.07921
yeast	DIA	L_ulti_ex	476	191	65	2.49215	2.93846
yeast	DIA	L_ulti_ex_FAIMS	887	401	238	2.21197	1.68487

## Sheet: human_DIA
Species	Aquisition Mode	Lab.Setup	Number of identified proteins			PYE1 vs PYE3	PYE3 vs PYE9
			PYE1	PYE3	PYE9	Ratio protein IDs (PYE1/PYE3)	Ratio protein IDs (PYE3/PYE9)
human	DIA	A_evo_ex	257	275	275	0.934545	1
human	DIA	A_ulti_ex	399	446	460	0.894619	0.969565
human	DIA	B_ulti_HF	226	232	214	0.974138	1.08411
human	DIA	B_ulti_HFX	245	242	250	1.0124	0.968
human	DIA	C_nE_tTOF	272	276	274	0.985507	1.0073
human	DIA	D_ulti_ecl	278	304	315	0.914474	0.965079
human	DIA	D_Vanq_ex	240	236	234	1.01695	1.00855
human	DIA	E_ulti_lumos	339	354	392	0.957627	0.903061
human	DIA	E_Vanq_ex	224	230	227	0.973913	1.01322
human	DIA	G_nLC_tTOF	368	393	412	0.936387	0.953883
human	DIA	G_ulti_ex	307	315	319	0.974603	0.987461
human	DIA	H_ulti_ecl	347	362	377	0.958564	0.960212
human	DIA	H_ulti_ex	411	435	448	0.944828	0.970982
human	DIA	I_nLC_ex	382	420	471	0.909524	0.89172
human	DIA	J_nLC_tTOF	413	394	381	1.04822	1.03412
human	DIA	K_Mclass_zTOF	287	303	296	0.947195	1.02365
human	DIA	L_nAcqu_tTOF	229	243	232	0.942387	1.04741
human	DIA	L_nE_tTOF	246	244	251	1.0082	0.972112
human	DIA	L_ulti_ex	304	286	290	1.06294	0.986207
human	DIA	L_ulti_ex_FAIMS	435	396	530	1.09848	0.74717
