# Supplementary material for: Multicenter evaluation of label-free quantification in human plasma on a high dynamic range benchmark set
Source: Nat Commun. 2025 Oct 2;16:8774. doi: 10.1038/s41467-025-64501-z (PMC12491457; doi:10.1038/s41467-025-64501-z)
Supplement: Supplementary file 6 — Supplementary Data 4 [file 41467_2025_64501_MOESM6_ESM.xlsx]

## Sheet: Legend
Supplementary Data 4. Summary of coefficients of variation (CVs) of protein abundances in samples PYE1 A and PYE1 B for the 14 DDA and 20 DIA datasets analysed by MaxQuant and DIA-NN, respectively. Additionally, data displayed in figure panels Fig. 4 e,f are summarized including retention times (RT) CVs and peak capacities for the DDA and DIA data. Peak capacities were calculated using the averag…

## Sheet: Fig_4A_CV_DDA_PYEA1
Lab.Setup	5th percentile	first quartile/25 th percentile	50th percentile/median	third quartile/75 th percentile	90th percentile
A_evo_ex	2.45	4.66	7.83	18.78	77.85
A_ulti_ex	4.3	7.24	11.19	20.07	78.37
B_ulti_HF	2.93	5.86	10.79	33.5	109.61
B_ulti_HFX	2.38	4.62	7.85	14.56	77.51
C_nE_tTOF	2.99	5.91	16.6	52.2	109.97
D_Vanq_ex	3.09	5.77	8.97	14.42	37.21
D_ulti_ecl	8.84	14.61	20.61	35.84	79.77
E_Vanq_ex	1.86	3.86	6.44	10.96	16.88
E_ulti_lumos	4.55	7.93	11.28	17.2	49.27
F_Vanq_ecl	4.09	7.26	10.99	17.22	46.3
G_nLC_tTOF	2.69	5.5	11.25	36.26	109.69
G_ulti_ex	2.85	5.26	8.23	13.35	23.76
H_ulti_ecl	50.09	52.7	54.73	58.63	66.52
H_ulti_ex	17.83	25.88	28.86	32.84	40.09

## Sheet: CV_DDA_PYEB1
Lab.Setup	5th percentile	first quartile/25 th percentile	50th percentile/median	third quartile/75 th percentile	90th percentile
A_evo_ex	2.63	4.73	7.36	16.75	77.56
A_ulti_ex	5.74	8.77	12.13	21.02	54.85
B_ulti_HF	2.94	5.46	10.57	27.25	109.59
B_ulti_HFX	2.4	4.68	8.32	16.6	52.64
C_nE_tTOF	3.24	7.34	18.21	55.29	110.32
D_Vanq_ex	2.94	5.8	9.54	16.75	34.99
D_ulti_ecl	8.47	14.82	21.13	33.09	78.13
E_Vanq_ex	2.07	4.02	6.71	11.68	21
E_ulti_lumos	5.05	8.64	12.48	18.2	31.29
F_Vanq_ecl	3.71	7.1	11.36	17.71	44.65
G_nLC_tTOF	2.47	5.28	11.04	35.5	80.21
G_ulti_ex	2.8	5.23	8.35	13.32	24.16
H_ulti_ecl	20.55	32.7	39.37	48.67	65.61
H_ulti_ex	15.66	22.35	27.43	34.02	47.96

## Sheet: Fig_4B_CV_DIANN_PYE1A
Lab.Setup	5th percentile	first quartile/25 th percentile	50th percentile/median	third quartile/75 th percentile	90th percentile
I_nLC_ex	2.18	4.46	7.82	14.6	23.71
A_ulti_ex	1.53	3.12	5.65	10.61	17.68
G_ulti_ex	0.78	1.77	3.29	6.53	11.87
H_ulti_ex	1.03	2.15	4.16	8.43	14.77
L_ulti_ex	0.84	2.07	3.52	6.45	11.62
A_evo_ex	1.12	2.34	4.21	7.79	13.32
D_Vanq_ex	0.96	2.2	4.5	9.65	16.92
E_Vanq_ex	0.82	1.87	3.84	8.4	15.27
B_ulti_HF	1.42	3.1	5.96	11.33	18.68
D_ulti_ecl	1.66	3.19	5.57	10.57	17.66
H_ulti_ecl	1.23	2.51	4.61	9.17	16.45
B_ulti_HFX	1.18	2.58	4.82	9.54	16.44
L_ulti_ex_FAIMS	1.15	2.84	5.65	10.53	17.77
E_ulti_lumos	0.91	2.17	4.64	10.04	18.25
G_nLC_tTOF	2.38	5.13	9.01	15.32	23.61
L_nE_tTOF	1.3	3.75	7.56	13.84	22.42
L_nAcqu_tTOF	1.6	4.11	7.62	13.25	20.39
C_nE_tTOF	2.23	4.61	7.95	13.55	21.17
J_nLC_tTOF	1.5	4.59	9.76	18	29.72
K_Mclass_zTOF	1.34	3.46	7.08	13.56	22.53

## Sheet: CV_DIANN_PYE1B
Lab.Setup	5th percentile	first quartile/25 th percentile	50th percentile/median	third quartile/75 th percentile	90th percentile
A_evo_ex	1.02	1.96	3.48	6.39	10.34
A_ulti_ex	1.59	3.05	5.27	9.19	14.91
B_ulti_HFX	1.25	2.52	4.65	8.36	14.56
B_ulti_HF	1.5	3.2	6.12	11.49	18.5
D_Vanq_ex	1.05	2.25	4.31	9.25	16.07
D_ulti_ecl	1.7	3.19	5.48	9.63	15.41
E_Vanq_ex	1.02	1.97	3.81	7.75	14.69
E_ulti_lumos	0.93	2.12	4.43	8.69	15.47
G_nLC_tTOF	2.33	4.78	8.28	13.78	20.82
G_ulti_ex	0.73	1.58	2.89	5.32	9.05
K_Mclass_zTOF	1.32	3.16	6.2	11.52	18.03
I_nLC_ex	2.2	4.51	7.86	13.75	22.04
L_nE_tTOF	1.17	3.43	6.72	13.07	20.44
L_nAcqu_tTOF	1.96	4.71	7.97	12.99	20.18
H_ulti_ecl	1.43	2.95	4.98	8.55	14.11
C_nE_tTOF	2.41	5.07	8.84	14.81	22.06
J_nLC_tTOF	1.53	4.34	8.79	17.27	27.31
H_ulti_ex	0.93	1.94	3.66	6.74	11.42
L_ulti_ex_FAIMS	1.02	2.7	4.98	8.99	15.19
L_ulti_ex	0.93	2.17	3.91	6.89	10.41

## Sheet: Fig_4E_sourcetable_DDA
Lab.Setup	Peak.Capacity	Median_RT_CV	Avg.Peak.Width	Gradient.Length	LC.System
A_evo_ex	123.83	0.32	0.32	44	Nanoflow
A_ulti_ex	360.85	0.05	0.21	50	Nanoflow
B_ulti_HF	144.22	0.39	0.67	90	Nanoflow
B_ulti_HFX	167.17	0.31	0.62	90	Nanoflow
C_nE_tTOF	236.78	0.38	0.3	70	Nanoflow
D_Vanq_ex	227.63	0.99	0.27	60	Microflow
D_ulti_ecl	152.7	0.2	0.39	60	Nanoflow
E_Vanq_ex	217.4	0.11	0.28	60	Microflow
E_ulti_lumos	166.45	0.17	0.36	60	Nanoflow
F_Vanq_ecl	171.52	0.28	0.36	60	Microflow
G_nLC_tTOF	246.67	0.32	0.15	30	Nanoflow
G_ulti_ex	178.2	0.22	0.31	48	Nanoflow
H_ulti_ecl	177.38	0.63	0.65	120	Nanoflow
H_ulti_ex	302.21	0.27	0.35	102	Nanoflow

## Sheet: Fig_4F_sourcetable_DIA
Lab.Setup	Peak.Capacity	Median_RT_CV	Avg.Peak.Width	Gradient.Length	LC.System
D_ulti_ecl	84.94	0.22	0.62	60	Nanoflow
H_ulti_ecl	164.95	0.13	0.71	120	Nanoflow
A_evo_ex	92.58	0.26	0.43	44	Nanoflow
A_ulti_ex	185.81	0.09	0.36	50	Nanoflow
D_Vanq_ex	144.15	0.38	0.42	60	Microflow
E_Vanq_ex	244.28	0.09	0.25	60	Microflow
G_ulti_ex	109.67	0.17	0.41	48	Nanoflow
H_ulti_ex	107.4	0.38	0.96	102	Nanoflow
I_nLC_ex	37.26	1.19	0.86	44	Nanoflow
L_ulti_ex	124.3	0.09	0.23	29	Nanoflow
L_ulti_ex_FAIMS	133.1	0.06	0.21	29	Nanoflow
B_ulti_HF	74.91	0.52	1.28	90	Nanoflow
B_ulti_HFX	112.02	0.23	0.84	90	Nanoflow
E_ulti_lumos	110.18	0.14	0.56	60	Nanoflow
C_nE_tTOF	136.01	0.21	0.52	70	Nanoflow
G_nLC_tTOF	105.45	0.32	0.31	30	Nanoflow
J_nLC_tTOF	64.56	0.72	0.49	44	Nanoflow
L_nAcqu_tTOF	81.74	0.17	0.12	11	Nanoflow
L_nE_tTOF	171.62	0.07	0.21	35.5	Nanoflow
K_Mclass_zTOF	95.12	0.16	0.2	20	Microflow
