# Supplementary material for: Multicenter evaluation of label-free quantification in human plasma on a high dynamic range benchmark set
Source: Nat Commun. 2025 Oct 2;16:8774. doi: 10.1038/s41467-025-64501-z (PMC12491457; doi:10.1038/s41467-025-64501-z)
Supplement: Supplementary file 7 — Supplementary Data 5 [file 41467_2025_64501_MOESM7_ESM.xlsx]

## Sheet: Legend
Supplementary Data 5. Summary of precision and accuracy values for the 13 mapping DDA and DIA datasets. Calculated log2(FC) values (median value of the distribution) between samples PYE1 A and B are listed in the present table along with the global precision of quantification defined by the interquartile range and the standard deviation of the log2(FC) distribution of human, yeast and E. coli pro…

## Sheet: PYE1 statistics
Lab.Setup	species	median ratio - log2 (A/B)	s.d. ratio - log2 (A/B)	interquartile range Q072-Q025 - log2 (A/B)	Lab.Setup	species	median ratio - log2 (A/B)	s.d. ratio - log2 (A/B)	interquartile range Q072-Q025 - log2 (A/B)
DDA_A_evo_ex	Ecoli	1.23	0.21	0.17	DIA_A_evo_ex	Ecoli	1.01	0.23	0.21
DDA_A_evo_ex	Human	0.2	0.2	0.07	DIA_A_evo_ex	Human	0.12	0.2	0.06
DDA_A_evo_ex	Yeast	-1.38	0.28	0.26	DIA_A_evo_ex	Yeast	-1.25	0.3	0.28
DDA_A_ulti_ex	Ecoli	1.19	0.25	0.24	DIA_A_ulti_ex	Ecoli	0.96	0.22	0.17
DDA_A_ulti_ex	Human	0.18	0.23	0.19	DIA_A_ulti_ex	Human	0.06	0.28	0.1
DDA_A_ulti_ex	Yeast	-1.36	0.28	0.27	DIA_A_ulti_ex	Yeast	-1.41	0.26	0.18
DDA_B_ulti_HF	Ecoli	1.02	0.2	0.25	DIA_B_ulti_HF	Ecoli	1.12	0.21	0.2
DDA_B_ulti_HF	Human	0.1	0.05	0.06	DIA_B_ulti_HF	Human	0.02	0.16	0.06
DDA_B_ulti_HF	Yeast	-1.39	0.3	0.32	DIA_B_ulti_HF	Yeast	-1.68	0.3	0.26
DDA_B_ulti_HFX	Ecoli	1.05	0.17	0.14	DIA_B_ulti_HFX	Ecoli	1.06	0.2	0.15
DDA_B_ulti_HFX	Human	0.1	0.07	0.05	DIA_B_ulti_HFX	Human	0.06	0.27	0.06
DDA_B_ulti_HFX	Yeast	-1.39	0.24	0.23	DIA_B_ulti_HFX	Yeast	-1.47	0.27	0.19
DDA_C_nE_tTOF	Ecoli	1.17	0.31	0.26	DIA_C_nE_tTOF	Ecoli	1.03	0.17	0.14
DDA_C_nE_tTOF	Human	0.17	0.2	0.1	DIA_C_nE_tTOF	Human	0.13	0.26	0.07
DDA_C_nE_tTOF	Yeast	-1.44	0.38	0.38	DIA_C_nE_tTOF	Yeast	-1.21	0.23	0.22
DDA_D_Vanq_ex	Ecoli	1.08	0.17	0.16	DIA_D_Vanq_ex	Ecoli	1.11	0.22	0.2
DDA_D_Vanq_ex	Human	0.13	0.09	0.1	DIA_D_Vanq_ex	Human	0.02	0.35	0.06
DDA_D_Vanq_ex	Yeast	-1.42	0.26	0.23	DIA_D_Vanq_ex	Yeast	-1.65	0.26	0.27
DDA_D_ulti_ecl	Ecoli	1.03	0.24	0.27	DIA_D_ulti_ecl	Ecoli	1.09	0.19	0.15
DDA_D_ulti_ecl	Human	0.06	0.25	0.18	DIA_D_ulti_ecl	Human	0.1	0.23	0.08
DDA_D_ulti_ecl	Yeast	-1.45	0.28	0.3	DIA_D_ulti_ecl	Yeast	-1.47	0.28	0.2
DDA_E_Vanq_ex	Ecoli	1.1	0.16	0.12	DIA_E_Vanq_ex	Ecoli	1.1	0.22	0.19
DDA_E_Vanq_ex	Human	0.12	0.07	0.05	DIA_E_Vanq_ex	Human	0.02	0.32	0.05
DDA_E_Vanq_ex	Yeast	-1.42	0.26	0.19	DIA_E_Vanq_ex	Yeast	-1.62	0.26	0.23
DDA_E_ulti_lumos	Ecoli	1.07	0.22	0.21	DIA_E_ulti_lumos	Ecoli	1.11	0.2	0.16
DDA_E_ulti_lumos	Human	0.14	0.12	0.13	DIA_E_ulti_lumos	Human	0.09	0.32	0.08
DDA_E_ulti_lumos	Yeast	-1.41	0.27	0.27	DIA_E_ulti_lumos	Yeast	-1.52	0.26	0.23
DDA_G_nLC_tTOF	Ecoli	1.15	0.33	0.22	DIA_G_nLC_tTOF	Ecoli	1.07	0.17	0.14
DDA_G_nLC_tTOF	Human	0.26	0.56	0.16	DIA_G_nLC_tTOF	Human	0.19	0.3	0.12
DDA_G_nLC_tTOF	Yeast	-1.22	0.33	0.32	DIA_G_nLC_tTOF	Yeast	-1.16	0.22	0.22
DDA_G_ulti_ex	Ecoli	1.09	0.2	0.15	DIA_G_ulti_ex	Ecoli	1.02	0.21	0.18
DDA_G_ulti_ex	Human	0.13	0.13	0.1	DIA_G_ulti_ex	Human	0.13	0.24	0.06
DDA_G_ulti_ex	Yeast	-1.39	0.25	0.19	DIA_G_ulti_ex	Yeast	-1.27	0.27	0.23
DDA_H_ulti_ecl	Ecoli	0.81	0.19	0.18	DIA_H_ulti_ecl	Ecoli	1.11	0.2	0.12
DDA_H_ulti_ecl	Human	-0.19	0.19	0.11	DIA_H_ulti_ecl	Human	0.13	0.25	0.07
DDA_H_ulti_ecl	Yeast	-1.76	0.34	0.3	DIA_H_ulti_ecl	Yeast	-1.4	0.27	0.2
DDA_H_ulti_ex	Ecoli	0.78	0.18	0.16	DIA_H_ulti_ex	Ecoli	1.1	0.17	0.1
DDA_H_ulti_ex	Human	-0.19	0.19	0.1	DIA_H_ulti_ex	Human	0.1	0.28	0.06
DDA_H_ulti_ex	Yeast	-1.73	0.29	0.22	DIA_H_ulti_ex	Yeast	-1.45	0.23	0.15
