# Supplementary material for: Multicenter evaluation of label-free quantification in human plasma on a high dynamic range benchmark set
Source: Nat Commun. 2025 Oct 2;16:8774. doi: 10.1038/s41467-025-64501-z (PMC12491457; doi:10.1038/s41467-025-64501-z)
Supplement: Supplementary file 8 — Supplementary Data 6 [file 41467_2025_64501_MOESM8_ESM.xlsx]

## Sheet: Legend
Supplementary Data 6. Summary of precision and accuracy values for the PYE1, PYE3 and PYE9 samples analysed with 20 different DIA LC-MS setups. Calculated log2(FC) values (median value of the distribution) between samples A and B are listed in the present table along with the global precision of quantification defined by the interquartile range and the standard deviation of the log2(FC) distribut…

## Sheet: PYE1 statistics
Lab.Setup	species	mean ratio - log2 (A/B)	s.d. ratio - log2 (A/B)	interquartile range Q072-Q025 - log2 (A/B)
A_evo_ex	Ecoli	0.95	0.23	0.21
A_evo_ex	Human	0.1	0.2	0.06
A_evo_ex	Yeast	-1.18	0.3	0.28
A_ulti_ex	Ecoli	0.92	0.22	0.17
A_ulti_ex	Human	0.02	0.28	0.1
A_ulti_ex	Yeast	-1.37	0.26	0.18
B_ulti_HF	Ecoli	1.15	0.21	0.2
B_ulti_HF	Human	0.02	0.16	0.06
B_ulti_HF	Yeast	-1.7	0.3	0.26
B_ulti_HFX	Ecoli	1.04	0.2	0.15
B_ulti_HFX	Human	0.02	0.27	0.06
B_ulti_HFX	Yeast	-1.46	0.27	0.19
C_nE_tTOF	Ecoli	1	0.17	0.14
C_nE_tTOF	Human	0.1	0.26	0.07
C_nE_tTOF	Yeast	-1.15	0.23	0.22
D_Vanq_ex	Ecoli	1.15	0.22	0.2
D_Vanq_ex	Human	-0.05	0.35	0.06
D_Vanq_ex	Yeast	-1.7	0.26	0.27
D_ulti_ecl	Ecoli	1.08	0.19	0.15
D_ulti_ecl	Human	0.06	0.23	0.08
D_ulti_ecl	Yeast	-1.47	0.28	0.2
E_Vanq_ex	Ecoli	1.14	0.22	0.19
E_Vanq_ex	Human	-0.04	0.32	0.05
E_Vanq_ex	Yeast	-1.66	0.26	0.23
E_ulti_lumos	Ecoli	1.12	0.2	0.16
E_ulti_lumos	Human	0.03	0.32	0.08
E_ulti_lumos	Yeast	-1.53	0.26	0.23
G_nLC_tTOF	Ecoli	1.05	0.17	0.14
G_nLC_tTOF	Human	0.15	0.3	0.12
G_nLC_tTOF	Yeast	-1.11	0.22	0.22
G_ulti_ex	Ecoli	0.98	0.21	0.18
G_ulti_ex	Human	0.11	0.24	0.06
G_ulti_ex	Yeast	-1.21	0.27	0.23
H_ulti_ecl	Ecoli	1.11	0.2	0.12
H_ulti_ecl	Human	0.1	0.25	0.07
H_ulti_ecl	Yeast	-1.39	0.27	0.2
H_ulti_ex	Ecoli	1.08	0.17	0.1
H_ulti_ex	Human	0.05	0.28	0.06
H_ulti_ex	Yeast	-1.43	0.23	0.15
I_nLC_ex	Ecoli	0.94	0.21	0.17
I_nLC_ex	Human	0.05	0.31	0.1
I_nLC_ex	Yeast	-1.19	0.24	0.22
J_nLC_tTOF	Ecoli	1.02	0.2	0.18
J_nLC_tTOF	Human	0.22	0.33	0.24
J_nLC_tTOF	Yeast	-1.31	0.26	0.22
K_Mclass_zTOF	Ecoli	0.9	0.19	0.18
K_Mclass_zTOF	Human	0.04	0.24	0.07
K_Mclass_zTOF	Yeast	-1.24	0.24	0.21
L_nAcqu_tTOF	Ecoli	0.62	0.18	0.21
L_nAcqu_tTOF	Human	-0.17	0.18	0.11
L_nAcqu_tTOF	Yeast	-1.48	0.24	0.23
L_nE_tTOF	Ecoli	0.93	0.18	0.16
L_nE_tTOF	Human	0.04	0.25	0.09
L_nE_tTOF	Yeast	-1.24	0.19	0.21
L_ulti_ex	Ecoli	0.62	0.21	0.24
L_ulti_ex	Human	-0.16	0.16	0.09
L_ulti_ex	Yeast	-1.54	0.32	0.3
L_ulti_ex_FAIMS	Ecoli	0.99	0.22	0.19
L_ulti_ex_FAIMS	Human	0.07	0.2	0.14
L_ulti_ex_FAIMS	Yeast	-1.46	0.31	0.25

## Sheet: PYE3 statistics
Lab.Setup	species	mean ratio - log2 (A/B)	s.d. ratio - log2 (A/B)	interquartile range Q072-Q025 - log2 (A/B)
A_evo_ex	Ecoli	0.98	0.21	0.17
A_evo_ex	Human	0.05	0.18	0.06
A_evo_ex	Yeast	-1.29	0.3	0.25
A_ulti_ex	Ecoli	0.93	0.21	0.19
A_ulti_ex	Human	0.05	0.27	0.14
A_ulti_ex	Yeast	-1.33	0.28	0.22
B_ulti_HF	Ecoli	1.15	0.2	0.23
B_ulti_HF	Human	-0.01	0.2	0.06
B_ulti_HF	Yeast	-1.7	0.26	0.26
B_ulti_HFX	Ecoli	1.16	0.22	0.2
B_ulti_HFX	Human	0.03	0.22	0.06
B_ulti_HFX	Yeast	-1.58	0.26	0.23
C_nE_tTOF	Ecoli	0.82	0.17	0.19
C_nE_tTOF	Human	0.07	0.19	0.1
C_nE_tTOF	Yeast	-1.03	0.23	0.27
D_Vanq_ex	Ecoli	1.25	0.24	0.29
D_Vanq_ex	Human	-0.03	0.28	0.04
D_Vanq_ex	Yeast	-1.8	0.28	0.32
D_ulti_ecl	Ecoli	1.12	0.18	0.17
D_ulti_ecl	Human	0.06	0.21	0.09
D_ulti_ecl	Yeast	-1.53	0.26	0.2
E_Vanq_ex	Ecoli	1.21	0.23	0.26
E_Vanq_ex	Human	-0.03	0.18	0.03
E_Vanq_ex	Yeast	-1.78	0.25	0.29
E_ulti_lumos	Ecoli	1.11	0.18	0.17
E_ulti_lumos	Human	0	0.28	0.07
E_ulti_lumos	Yeast	-1.61	0.26	0.23
G_nLC_tTOF	Ecoli	0.9	0.17	0.14
G_nLC_tTOF	Human	0.06	0.22	0.09
G_nLC_tTOF	Yeast	-1.16	0.25	0.26
G_ulti_ex	Ecoli	0.91	0.2	0.19
G_ulti_ex	Human	0.07	0.17	0.07
G_ulti_ex	Yeast	-1.18	0.29	0.3
H_ulti_ecl	Ecoli	1.1	0.18	0.15
H_ulti_ecl	Human	0.02	0.27	0.06
H_ulti_ecl	Yeast	-1.55	0.27	0.22
H_ulti_ex	Ecoli	1.08	0.2	0.12
H_ulti_ex	Human	0.07	0.21	0.07
H_ulti_ex	Yeast	-1.42	0.28	0.16
I_nLC_ex	Ecoli	0.93	0.24	0.18
I_nLC_ex	Human	0.04	0.28	0.09
I_nLC_ex	Yeast	-1.26	0.27	0.23
J_nLC_tTOF	Ecoli	0.95	0.2	0.19
J_nLC_tTOF	Human	0.01	0.21	0.13
J_nLC_tTOF	Yeast	-1.28	0.25	0.25
K_Mclass_zTOF	Ecoli	0.94	0.19	0.17
K_Mclass_zTOF	Human	0.05	0.18	0.06
K_Mclass_zTOF	Yeast	-1.28	0.22	0.22
L_nAcqu_tTOF	Ecoli	0.7	0.19	0.2
L_nAcqu_tTOF	Human	-0.1	0.17	0.1
L_nAcqu_tTOF	Yeast	-1.47	0.26	0.21
L_nE_tTOF	Ecoli	0.87	0.16	0.18
L_nE_tTOF	Human	0.01	0.2	0.09
L_nE_tTOF	Yeast	-1.19	0.22	0.25
L_ulti_ex	Ecoli	0.82	0.19	0.18
L_ulti_ex	Human	-0.04	0.11	0.05
L_ulti_ex	Yeast	-1.41	0.32	0.3
L_ulti_ex_FAIMS	Ecoli	1.12	0.28	0.27
L_ulti_ex_FAIMS	Human	0	0.22	0.18
L_ulti_ex_FAIMS	Yeast	-1.82	0.31	0.43

## Sheet: PYE9 statistics
Lab.Setup	species	mean ratio - log2 (A/B)	s.d. ratio - log2 (A/B)	interquartile range Q072-Q025 - log2 (A/B)
A_evo_ex	Ecoli	0.86	0.19	0.16
A_evo_ex	Human	-0.05	0.11	0.04
A_evo_ex	Yeast	-1.43	0.28	0.29
A_ulti_ex	Ecoli	0.95	0.19	0.16
A_ulti_ex	Human	0.05	0.25	0.15
A_ulti_ex	Yeast	-1.53	0.28	0.21
B_ulti_HF	Ecoli	1.27	0.23	0.26
B_ulti_HF	Human	0.02	0.09	0.05
B_ulti_HF	Yeast	-1.85	0.24	0.31
B_ulti_HFX	Ecoli	1.13	0.22	0.22
B_ulti_HFX	Human	-0.01	0.17	0.04
B_ulti_HFX	Yeast	-1.74	0.32	0.28
C_nE_tTOF	Ecoli	0.83	0.16	0.16
C_nE_tTOF	Human	-0.01	0.17	0.07
C_nE_tTOF	Yeast	-1.32	0.25	0.21
D_Vanq_ex	Ecoli	1.29	0.24	0.27
D_Vanq_ex	Human	-0.02	0.18	0.03
D_Vanq_ex	Yeast	-1.88	0.35	0.31
D_ulti_ecl	Ecoli	1.09	0.19	0.19
D_ulti_ecl	Human	0.04	0.26	0.07
D_ulti_ecl	Yeast	-1.72	0.24	0.27
E_Vanq_ex	Ecoli	1.28	0.24	0.21
E_Vanq_ex	Human	-0.01	0.15	0.03
E_Vanq_ex	Yeast	-1.85	0.34	0.3
E_ulti_lumos	Ecoli	0.97	0.22	0.17
E_ulti_lumos	Human	0.03	0.22	0.08
E_ulti_lumos	Yeast	-1.56	0.32	0.22
G_nLC_tTOF	Ecoli	0.88	0.19	0.18
G_nLC_tTOF	Human	0.11	0.26	0.14
G_nLC_tTOF	Yeast	-1.24	0.23	0.24
G_ulti_ex	Ecoli	0.87	0.19	0.17
G_ulti_ex	Human	-0.01	0.22	0.04
G_ulti_ex	Yeast	-1.37	0.27	0.26
H_ulti_ecl	Ecoli	1.07	0.19	0.17
H_ulti_ecl	Human	0	0.21	0.07
H_ulti_ecl	Yeast	-1.59	0.31	0.25
H_ulti_ex	Ecoli	1	0.19	0.16
H_ulti_ex	Human	0	0.15	0.07
H_ulti_ex	Yeast	-1.43	0.26	0.21
I_nLC_ex	Ecoli	0.82	0.19	0.2
I_nLC_ex	Human	0.04	0.28	0.08
I_nLC_ex	Yeast	-1.29	0.26	0.29
J_nLC_tTOF	Ecoli	0.84	0.22	0.21
J_nLC_tTOF	Human	0.02	0.18	0.12
J_nLC_tTOF	Yeast	-1.27	0.28	0.3
K_Mclass_zTOF	Ecoli	0.91	0.16	0.16
K_Mclass_zTOF	Human	0.02	0.15	0.05
K_Mclass_zTOF	Yeast	-1.32	0.25	0.26
L_nAcqu_tTOF	Ecoli	0.84	0.16	0.19
L_nAcqu_tTOF	Human	-0.02	0.1	0.08
L_nAcqu_tTOF	Yeast	-1.38	0.19	0.28
L_nE_tTOF	Ecoli	0.9	0.21	0.2
L_nE_tTOF	Human	0	0.18	0.11
L_nE_tTOF	Yeast	-1.28	0.24	0.23
L_ulti_ex	Ecoli	0.84	0.19	0.16
L_ulti_ex	Human	0	0.06	0.03
L_ulti_ex	Yeast	-1.22	0.25	0.36
L_ulti_ex_FAIMS	Ecoli	0.93	0.23	0.17
L_ulti_ex_FAIMS	Human	0.03	0.16	0.12
L_ulti_ex_FAIMS	Yeast	-1.6	0.39	0.34
