# Supplementary material for: Multicenter evaluation of label-free quantification in human plasma on a high dynamic range benchmark set
Source: Nat Commun. 2025 Oct 2;16:8774. doi: 10.1038/s41467-025-64501-z (PMC12491457; doi:10.1038/s41467-025-64501-z)
Supplement: Supplementary file 9 — Supplementary Data 7 [file 41467_2025_64501_MOESM9_ESM.xlsx]

## Sheet: Legend
Supplementary Data 7. Summary of different metrics for yeast proteins identified in the DIA dataset in sample sets PYE1, PYE3 and PYE9, such as protein ID number, precision and accuracy values, number of datapoints at FWHM as reported in DIA-NN (DP_FWHM), etc. Calculated log2(FC) values (median value of the distribution) between samples A and B are listed in the present table along with the globa…

## Sheet: Yeast_proteins_DIA_statistics
Organism	Accuracy	Precision	Lab.Setup	PYE	Dilution	Gradient.Length	median_CV_A	median_CV_B	mean_median_CV_AB	Peak.Capacity	DP_FWHM	No. of identified proteins
Yeast	0.34	0.28	A_evo_ex	A_evo_ex_PYE1	PYE1	44	5.95	3.25	4.6	92.58	2.2	1520
Yeast	0.23	0.25	A_evo_ex	A_evo_ex_PYE3	PYE3	44	6.34	4.26	5.3	92.46	2.2	909
Yeast	0.1	0.29	A_evo_ex	A_evo_ex_PYE9	PYE9	44	7.05	4.09	5.57	90.93	2.2	445
Yeast	0.17	0.18	A_ulti_ex	A_ulti_ex_PYE1	PYE1	50	7.34	4.98	6.16	185.81	1.67	1784
Yeast	0.21	0.22	A_ulti_ex	A_ulti_ex_PYE3	PYE3	50	8.2	5.86	7.03	191.5	1.67	1044
Yeast	0.02	0.21	A_ulti_ex	A_ulti_ex_PYE9	PYE9	50	9.52	6.54	8.03	140.45	1.67	482
Yeast	-0.09	0.26	B_ulti_HF	B_ulti_HF_PYE1	PYE1	90	8.31	5.95	7.13	74.91	3.18	764
Yeast	-0.11	0.26	B_ulti_HF	B_ulti_HF_PYE3	PYE3	90	9.85	7.78	8.815	73.18	3.18	379
Yeast	-0.29	0.31	B_ulti_HF	B_ulti_HF_PYE9	PYE9	90	13.04	12.14	12.59	72.63	3.18	99
Yeast	0.11	0.19	B_ulti_HFX	B_ulti_HFX_PYE1	PYE1	90	6.78	4.43	5.605	112.02	2.31	1000
Yeast	0	0.23	B_ulti_HFX	B_ulti_HFX_PYE3	PYE3	90	8.2	5.93	7.065	109.33	2.31	495
Yeast	-0.18	0.28	B_ulti_HFX	B_ulti_HFX_PYE9	PYE9	90	11.65	7.59	9.62	110.92	2.31	188
Yeast	0.37	0.22	C_nE_tTOF	C_nE_tTOF_PYE1	PYE1	70	9.72	8.36	9.04	136.01	3.57	1588
Yeast	0.51	0.27	C_nE_tTOF	C_nE_tTOF_PYE3	PYE3	70	9.19	6.62	7.905	148.28	3.57	901
Yeast	0.19	0.21	C_nE_tTOF	C_nE_tTOF_PYE9	PYE9	70	11.19	8.77	9.98	122.99	3.57	414
Yeast	0.12	0.2	D_ulti_ecl	D_ulti_ecl_PYE1	PYE1	60	7.23	5.17	6.2	84.94	2.44	1357
Yeast	0.05	0.2	D_ulti_ecl	D_ulti_ecl_PYE3	PYE3	60	8.78	6.32	7.55	84.89	2.42	745
Yeast	-0.14	0.27	D_ulti_ecl	D_ulti_ecl_PYE9	PYE9	60	10.75	7.78	9.265	83.16	2.37	336
Yeast	-0.07	0.27	D_Vanq_ex	D_Vanq_ex_PYE1	PYE1	60	6.79	4	5.395	144.15	3.12	849
Yeast	-0.2	0.32	D_Vanq_ex	D_Vanq_ex_PYE3	PYE3	60	8.31	5.36	6.835	145.72	3.12	411
Yeast	-0.27	0.31	D_Vanq_ex	D_Vanq_ex_PYE9	PYE9	60	10.59	6.19	8.39	151.89	3.12	174
Yeast	0.06	0.23	E_ulti_lumos	E_ulti_lumos_PYE1	PYE1	60	6.86	4.17	5.515	110.18	2.13	1512
Yeast	0	0.23	E_ulti_lumos	E_ulti_lumos_PYE3	PYE3	60	7.29	4.68	5.985	111.09	2.13	841
Yeast	0	0.22	E_ulti_lumos	E_ulti_lumos_PYE9	PYE9	60	7.86	4.82	6.34	89.16	2.13	451
Yeast	-0.04	0.23	E_Vanq_ex	E_Vanq_ex_PYE1	PYE1	60	5.51	3.55	4.53	244.28	3.08	765
Yeast	-0.17	0.29	E_Vanq_ex	E_Vanq_ex_PYE3	PYE3	60	7.02	4.53	5.775	233.42	3.08	358
Yeast	-0.27	0.3	E_Vanq_ex	E_Vanq_ex_PYE9	PYE9	60	9.41	6.14	7.775	230.14	3.08	134
Yeast	0.42	0.22	G_nLC_tTOF	G_nLC_tTOF_PYE1	PYE1	30	11.15	8.1	9.625	105.45	2.09	2388
Yeast	0.36	0.26	G_nLC_tTOF	G_nLC_tTOF_PYE3	PYE3	30	11.87	9.4	10.635	97.71	2.09	1570
Yeast	0.29	0.24	G_nLC_tTOF	G_nLC_tTOF_PYE9	PYE9	30	13.64	10.15	11.895	87.37	2.09	818
Yeast	0.32	0.23	G_ulti_ex	G_ulti_ex_PYE1	PYE1	48	4.87	2.74	3.805	109.67	2.37	1850
Yeast	0.33	0.3	G_ulti_ex	G_ulti_ex_PYE3	PYE3	48	5.26	3.08	4.17	111.75	2.37	1132
Yeast	0.17	0.26	G_ulti_ex	G_ulti_ex_PYE9	PYE9	48	6.61	3.57	5.09	108.47	2.37	626
Yeast	0.18	0.2	H_ulti_ecl	H_ulti_ecl_PYE1	PYE1	120	6.56	4.65	5.605	164.95	2.5	2060
Yeast	0.04	0.22	H_ulti_ecl	H_ulti_ecl_PYE3	PYE3	120	8.09	5.68	6.885	157.05	2.45	1166
Yeast	-0.01	0.25	H_ulti_ecl	H_ulti_ecl_PYE9	PYE9	120	9.51	6.77	8.14	143.16	2.45	617
Yeast	0.13	0.15	H_ulti_ex	H_ulti_ex_PYE1	PYE1	102	5.78	3.5	4.64	107.4	2.13	2243
Yeast	0.14	0.16	H_ulti_ex	H_ulti_ex_PYE3	PYE3	102	6.42	4.1	5.26	131.78	2.12	1376
Yeast	0.11	0.21	H_ulti_ex	H_ulti_ex_PYE9	PYE9	102	7.75	5.14	6.445	133.35	2.14	727
Yeast	0.34	0.22	I_nLC_ex	I_nLC_ex_PYE1	PYE1	44	10.12	7.7	8.91	37.26	1.41	1883
Yeast	0.27	0.23	I_nLC_ex	I_nLC_ex_PYE3	PYE3	44	10.59	9	9.795	38.07	1.41	1104
Yeast	0.23	0.29	I_nLC_ex	I_nLC_ex_PYE9	PYE9	44	12.52	9.47	10.995	48.36	1.41	615
Yeast	0.23	0.22	J_nLC_tTOF	J_nLC_tTOF_PYE1	PYE1	44	11.79	8.31	10.05	64.56	1.71	1209
Yeast	0.25	0.25	J_nLC_tTOF	J_nLC_tTOF_PYE3	PYE3	44	11.59	8.64	10.115	93.68	1.71	723
Yeast	0.25	0.3	J_nLC_tTOF	J_nLC_tTOF_PYE9	PYE9	44	13.79	9.75	11.77	91.95	1.71	383
Yeast	0.28	0.21	K_Mclass_zTOF	K_Mclass_zTOF_PYE1	PYE1	20	9.85	5.89	7.87	95.12	2.37	1810
Yeast	0.24	0.22	K_Mclass_zTOF	K_Mclass_zTOF_PYE3	PYE3	20	10.55	7.43	8.99	99.05	2.32	1075
Yeast	0.2	0.26	K_Mclass_zTOF	K_Mclass_zTOF_PYE9	PYE9	20	12.86	8.08	10.47	95.99	2.34	584
Yeast	0.09	0.23	L_nAcqu_tTOF	L_nAcqu_tTOF_PYE1	PYE1	11	11.23	7.62	9.425	81.74	2.74	358
Yeast	0.07	0.21	L_nAcqu_tTOF	L_nAcqu_tTOF_PYE3	PYE3	11	10.97	8.14	9.555	83.41	2.75	141
Yeast	0.18	0.28	L_nAcqu_tTOF	L_nAcqu_tTOF_PYE9	PYE9	11	10.72	7.66	9.19	83.72	2.86	42
Yeast	0.31	0.21	L_nE_tTOF	L_nE_tTOF_PYE1	PYE1	35.5	9.32	6.56	7.94	171.62	2.15	1252
Yeast	0.35	0.25	L_nE_tTOF	L_nE_tTOF_PYE3	PYE3	35.5	9.93	6.59	8.26	172.46	2.16	679
Yeast	0.27	0.23	L_nE_tTOF	L_nE_tTOF_PYE9	PYE9	35.5	12.49	8.42	10.455	164.48	2.16	345
Yeast	-0.01	0.3	L_ulti_ex	L_ulti_ex_PYE1	PYE1	29	5.37	3.75	4.56	124.3	3.11	370
Yeast	0.13	0.3	L_ulti_ex	L_ulti_ex_PYE3	PYE3	29	6.04	3.51	4.775	126.02	2.65	130
Yeast	0.33	0.36	L_ulti_ex	L_ulti_ex_PYE9	PYE9	29	3.98	2.61	3.295	129.36	3.05	41
Yeast	0.1	0.25	L_ulti_ex_FAIMS	L_ulti_ex_FAIMS_PYE1	PYE1	29	7.61	4.34	5.975	133.1	3.21	620
Yeast	-0.24	0.43	L_ulti_ex_FAIMS	L_ulti_ex_FAIMS_PYE3	PYE3	29	13.97	8.81	11.39	127.46	3.22	220
Yeast	-0.02	0.34	L_ulti_ex_FAIMS	L_ulti_ex_FAIMS_PYE9	PYE9	29	9.91	6.05	7.98	131.12	3.31	145
