# Supplementary material for: Multicenter evaluation of label-free quantification in human plasma on a high dynamic range benchmark set
Source: Nat Commun. 2025 Oct 2;16:8774. doi: 10.1038/s41467-025-64501-z (PMC12491457; doi:10.1038/s41467-025-64501-z)
Supplement: Supplementary file 11 — Supplementary Data 9 [file 41467_2025_64501_MOESM11_ESM.xlsx]

## Sheet: Legend
Supplementary Data 9. Overview and index of all files (raw data and search results) uploaded to jPOST/Proteomeexchange with the following identifiers: PXD056598 for ProteomeXchange and JPST003358 for jPOST.
Column	Column names	Description
A	LCMS_raw_data	Raw file name
B	Experiment	Indicates if the file is part of the "round robin dataset" (Round_robin_experiment) or has been acquired for additonal analysis (displayed in Fig. 8, Extended_analyses_method_transfer)
C	Sample	Indicates the sample type analysed, i.e. PYE1_A, PYE1_B, PYE3_A, PYE3_B, PYE9_A, PYE9_B, neat plasma
D	Site_of_data_acquisition	Site where data was acquired
E	Acquisition mode	Indictates if data were acquired in DDA or DIA mode
F	Setup	LC-MS used as defined in the main manuscript
G	Replicate	Replicate number (typically, each sample was acquired in six replicates)
H	Processing_software	Processing software used for data analysis
I - P	DIANN_reportMaxQuant_evidence_report MaxQuant_peptides_report MaxQuant_proteinGroups_report FragPipe_IonQuant_combined_ion_report FragPipe_IonQuant_combined_peptide_report FragPipe_IonQuant_combined_protein_report FragPipe_DIANN_report	Search results derived from the respective analysis tool

## Sheet: jPOST file index
LCMS_raw_data	Experiment	Sample	Site_of_data_acquisition	Acquisition mode	Setup	Replicate	Processing_software	DIANN_report	MaxQuant_evidence_report	MaxQuant_peptides_report	MaxQuant_proteinGroups_report	FragPipe_IonQuant_combined_ion_report	FragPipe_IonQuant_combined_peptide_report	FragPipe_IonQuant_combined_protein_report	FragPipe_DIANN_report
A1_G_DDA_nLC_tTOF_R1.d	Round_robin_experiment	PYE1_A	G	DDA	nLC_tTOF	1	MaxQuant;FragPipe		G1_nLC_tTOF_evidence.txt	G1_nLC_tTOF_peptides.txt	G1_nLC_tTOF_proteinGroups.txt	G1_nLC_tTOF_fragpipe_combined_ion.tsv	G1_nLC_tTOF_fragpipe_combined_peptide.tsv	G1_nLC_tTOF_fragpipe_combined_protein.tsv
A1_G_DDA_nLC_tTOF_R2.d	Round_robin_experiment	PYE1_A	G	DDA	nLC_tTOF	2	MaxQuant;FragPipe		G1_nLC_tTOF_evidence.txt	G1_nLC_tTOF_peptides.txt	G1_nLC_tTOF_proteinGroups.txt	G1_nLC_tTOF_fragpipe_combined_ion.tsv	G1_nLC_tTOF_fragpipe_combined_peptide.tsv	G1_nLC_tTOF_fragpipe_combined_protein.tsv
A1_G_DDA_nLC_tTOF_R3.d	Round_robin_experiment	PYE1_A	G	DDA	nLC_tTOF	3	MaxQuant;FragPipe		G1_nLC_tTOF_evidence.txt	G1_nLC_tTOF_peptides.txt	G1_nLC_tTOF_proteinGroups.txt	G1_nLC_tTOF_fragpipe_combined_ion.tsv	G1_nLC_tTOF_fragpipe_combined_peptide.tsv	G1_nLC_tTOF_fragpipe_combined_protein.tsv
A1_G_DDA_nLC_tTOF_R4.d	Round_robin_experiment	PYE1_A	G	DDA	nLC_tTOF	4	MaxQuant;FragPipe		G1_nLC_tTOF_evidence.txt	G1_nLC_tTOF_peptides.txt	G1_nLC_tTOF_proteinGroups.txt	G1_nLC_tTOF_fragpipe_combined_ion.tsv	G1_nLC_tTOF_fragpipe_combined_peptide.tsv	G1_nLC_tTOF_fragpipe_combined_protein.tsv
A1_G_DDA_nLC_tTOF_R5.d	Round_robin_experiment	PYE1_A	G	DDA	nLC_tTOF	5	MaxQuant;FragPipe		G1_nLC_tTOF_evidence.txt	G1_nLC_tTOF_peptides.txt	G1_nLC_tTOF_proteinGroups.txt	G1_nLC_tTOF_fragpipe_combined_ion.tsv	G1_nLC_tTOF_fragpipe_combined_peptide.tsv	G1_nLC_tTOF_fragpipe_combined_protein.tsv
A1_G_DDA_nLC_tTOF_R6.d	Round_robin_experiment	PYE1_A	G	DDA	nLC_tTOF	6	MaxQuant;FragPipe		G1_nLC_tTOF_evidence.txt	G1_nLC_tTOF_peptides.txt	G1_nLC_tTOF_proteinGroups.txt	G1_nLC_tTOF_fragpipe_combined_ion.tsv	G1_nLC_tTOF_fragpipe_combined_peptide.tsv	G1_nLC_tTOF_fragpipe_combined_protein.tsv
A1_G_DIA_nLC_tTOF_R1.d	Round_robin_experiment	PYE1_A	G	DIA	nLC_tTOF	1	DIANN;FragPipe	G1_nLC_tTOF_report.tsv							G1_nLC_tTOF_fragpipe_report.tsv
A1_G_DIA_nLC_tTOF_R2.d	Round_robin_experiment	PYE1_A	G	DIA	nLC_tTOF	2	DIANN;FragPipe	G1_nLC_tTOF_report.tsv							G1_nLC_tTOF_fragpipe_report.tsv
A1_G_DIA_nLC_tTOF_R3.d	Round_robin_experiment	PYE1_A	G	DIA	nLC_tTOF	3	DIANN;FragPipe	G1_nLC_tTOF_report.tsv							G1_nLC_tTOF_fragpipe_report.tsv
A1_G_DIA_nLC_tTOF_R4.d	Round_robin_experiment	PYE1_A	G	DIA	nLC_tTOF	4	DIANN;FragPipe	G1_nLC_tTOF_report.tsv							G1_nLC_tTOF_fragpipe_report.tsv
A1_G_DIA_nLC_tTOF_R5.d	Round_robin_experiment	PYE1_A	G	DIA	nLC_tTOF	5	DIANN;FragPipe	G1_nLC_tTOF_report.tsv							G1_nLC_tTOF_fragpipe_report.tsv
A1_G_DIA_nLC_tTOF_R6.d	Round_robin_experiment	PYE1_A	G	DIA	nLC_tTOF	6	DIANN;FragPipe	G1_nLC_tTOF_report.tsv							G1_nLC_tTOF_fragpipe_report.tsv
A3_G_DDA_nLC_tTOF_R1.d	Round_robin_experiment	PYE3_A	G	DDA	nLC_tTOF	1	MaxQuant;FragPipe		G3_nLC_tTOF_evidence.txt	G3_nLC_tTOF_peptides.txt	G3_nLC_tTOF_proteinGroups.txt	G3_nLC_tTOF_fragpipe_combined_ion.tsv	G3_nLC_tTOF_fragpipe_combined_peptide.tsv	G3_nLC_tTOF_fragpipe_combined_protein.tsv
A3_G_DDA_nLC_tTOF_R2.d	Round_robin_experiment	PYE3_A	G	DDA	nLC_tTOF	2	MaxQuant;FragPipe		G3_nLC_tTOF_evidence.txt	G3_nLC_tTOF_peptides.txt	G3_nLC_tTOF_proteinGroups.txt	G3_nLC_tTOF_fragpipe_combined_ion.tsv	G3_nLC_tTOF_fragpipe_combined_peptide.tsv	G3_nLC_tTOF_fragpipe_combined_protein.tsv
A3_G_DDA_nLC_tTOF_R3.d	Round_robin_experiment	PYE3_A	G	DDA	nLC_tTOF	3	MaxQuant;FragPipe		G3_nLC_tTOF_evidence.txt	G3_nLC_tTOF_peptides.txt	G3_nLC_tTOF_proteinGroups.txt	G3_nLC_tTOF_fragpipe_combined_ion.tsv	G3_nLC_tTOF_fragpipe_combined_peptide.tsv	G3_nLC_tTOF_fragpipe_combined_protein.tsv
A3_G_DDA_nLC_tTOF_R4.d	Round_robin_experiment	PYE3_A	G	DDA	nLC_tTOF	4	MaxQuant;FragPipe		G3_nLC_tTOF_evidence.txt	G3_nLC_tTOF_peptides.txt	G3_nLC_tTOF_proteinGroups.txt	G3_nLC_tTOF_fragpipe_combined_ion.tsv	G3_nLC_tTOF_fragpipe_combined_peptide.tsv	G3_nLC_tTOF_fragpipe_combined_protein.tsv
A3_G_DDA_nLC_tTOF_R5.d	Round_robin_experiment	PYE3_A	G	DDA	nLC_tTOF	5	MaxQuant;FragPipe		G3_nLC_tTOF_evidence.txt	G3_nLC_tTOF_peptides.txt	G3_nLC_tTOF_proteinGroups.txt	G3_nLC_tTOF_fragpipe_combined_ion.tsv	G3_nLC_tTOF_fragpipe_combined_peptide.tsv	G3_nLC_tTOF_fragpipe_combined_protein.tsv
A3_G_DDA_nLC_tTOF_R6.d	Round_robin_experiment	PYE3_A	G	DDA	nLC_tTOF	6	MaxQuant;FragPipe		G3_nLC_tTOF_evidence.txt	G3_nLC_tTOF_peptides.txt	G3_nLC_tTOF_proteinGroups.txt	G3_nLC_tTOF_fragpipe_combined_ion.tsv	G3_nLC_tTOF_fragpipe_combined_peptide.tsv	G3_nLC_tTOF_fragpipe_combined_protein.tsv
A3_G_DIA_nLC_tTOF_R1.d	Round_robin_experiment	PYE3_A	G	DIA	nLC_tTOF	1	DIANN;FragPipe	G3_nLC_tTOF_report.tsv							G3_nLC_tTOF_fragpipe_report.tsv
A3_G_DIA_nLC_tTOF_R2.d	Round_robin_experiment	PYE3_A	G	DIA	nLC_tTOF	2	DIANN;FragPipe	G3_nLC_tTOF_report.tsv							G3_nLC_tTOF_fragpipe_report.tsv
A3_G_DIA_nLC_tTOF_R3.d	Round_robin_experiment	PYE3_A	G	DIA	nLC_tTOF	3	DIANN;FragPipe	G3_nLC_tTOF_report.tsv							G3_nLC_tTOF_fragpipe_report.tsv
A3_G_DIA_nLC_tTOF_R4.d	Round_robin_experiment	PYE3_A	G	DIA	nLC_tTOF	4	DIANN;FragPipe	G3_nLC_tTOF_report.tsv							G3_nLC_tTOF_fragpipe_report.tsv
A3_G_DIA_nLC_tTOF_R5.d	Round_robin_experiment	PYE3_A	G	DIA	nLC_tTOF	5	DIANN;FragPipe	G3_nLC_tTOF_report.tsv							G3_nLC_tTOF_fragpipe_report.tsv
A3_G_DIA_nLC_tTOF_R6.d	Round_robin_experiment	PYE3_A	G	DIA	nLC_tTOF	6	DIANN;FragPipe	G3_nLC_tTOF_report.tsv							G3_nLC_tTOF_fragpipe_report.tsv
A9_G_DDA_nLC_tTOF_R1.d	Round_robin_experiment	PYE9_A	G	DDA	nLC_tTOF	1	MaxQuant;FragPipe		G9_nLC_tTOF_evidence.txt	G9_nLC_tTOF_peptides.txt	G9_nLC_tTOF_proteinGroups.txt	G9_nLC_tTOF_fragpipe_combined_ion.tsv	G9_nLC_tTOF_fragpipe_combined_peptide.tsv	G9_nLC_tTOF_fragpipe_combined_protein.tsv
A9_G_DDA_nLC_tTOF_R2.d	Round_robin_experiment	PYE9_A	G	DDA	nLC_tTOF	2	MaxQuant;FragPipe		G9_nLC_tTOF_evidence.txt	G9_nLC_tTOF_peptides.txt	G9_nLC_tTOF_proteinGroups.txt	G9_nLC_tTOF_fragpipe_combined_ion.tsv	G9_nLC_tTOF_fragpipe_combined_peptide.tsv	G9_nLC_tTOF_fragpipe_combined_protein.tsv
A9_G_DDA_nLC_tTOF_R3.d	Round_robin_experiment	PYE9_A	G	DDA	nLC_tTOF	3	MaxQuant;FragPipe		G9_nLC_tTOF_evidence.txt	G9_nLC_tTOF_peptides.txt	G9_nLC_tTOF_proteinGroups.txt	G9_nLC_tTOF_fragpipe_combined_ion.tsv	G9_nLC_tTOF_fragpipe_combined_peptide.tsv	G9_nLC_tTOF_fragpipe_combined_protein.tsv
A9_G_DDA_nLC_tTOF_R4.d	Round_robin_experiment	PYE9_A	G	DDA	nLC_tTOF	4	MaxQuant;FragPipe		G9_nLC_tTOF_evidence.txt	G9_nLC_tTOF_peptides.txt	G9_nLC_tTOF_proteinGroups.txt	G9_nLC_tTOF_fragpipe_combined_ion.tsv	G9_nLC_tTOF_fragpipe_combined_peptide.tsv	G9_nLC_tTOF_fragpipe_combined_protein.tsv
A9_G_DDA_nLC_tTOF_R5.d	Round_robin_experiment	PYE9_A	G	DDA	nLC_tTOF	5	MaxQuant;FragPipe		G9_nLC_tTOF_evidence.txt	G9_nLC_tTOF_peptides.txt	G9_nLC_tTOF_proteinGroups.txt	G9_nLC_tTOF_fragpipe_combined_ion.tsv	G9_nLC_tTOF_fragpipe_combined_peptide.tsv	G9_nLC_tTOF_fragpipe_combined_protein.tsv
A9_G_DDA_nLC_tTOF_R6.d	Round_robin_experiment	PYE9_A	G	DDA	nLC_tTOF	6	MaxQuant;FragPipe		G9_nLC_tTOF_evidence.txt	G9_nLC_tTOF_peptides.txt	G9_nLC_tTOF_proteinGroups.txt	G9_nLC_tTOF_fragpipe_combined_ion.tsv	G9_nLC_tTOF_fragpipe_combined_peptide.tsv	G9_nLC_tTOF_fragpipe_combined_protein.tsv
A9_G_DIA_nLC_tTOF_R1.d	Round_robin_experiment	PYE9_A	G	DIA	nLC_tTOF	1	DIANN;FragPipe	G9_nLC_tTOF_report.tsv							G9_nLC_tTOF_fragpipe_report.tsv
A9_G_DIA_nLC_tTOF_R2.d	Round_robin_experiment	PYE9_A	G	DIA	nLC_tTOF	2	DIANN;FragPipe	G9_nLC_tTOF_report.tsv							G9_nLC_tTOF_fragpipe_report.tsv
A9_G_DIA_nLC_tTOF_R3.d	Round_robin_experiment	PYE9_A	G	DIA	nLC_tTOF	3	DIANN;FragPipe	G9_nLC_tTOF_report.tsv							G9_nLC_tTOF_fragpipe_report.tsv
A9_G_DIA_nLC_tTOF_R4.d	Round_robin_experiment	PYE9_A	G	DIA	nLC_tTOF	4	DIANN;FragPipe	G9_nLC_tTOF_report.tsv							G9_nLC_tTOF_fragpipe_report.tsv
A9_G_DIA_nLC_tTOF_R5.d	Round_robin_experiment	PYE9_A	G	DIA	nLC_tTOF	5	DIANN;FragPipe	G9_nLC_tTOF_report.tsv							G9_nLC_tTOF_fragpipe_report.tsv
A9_G_DIA_nLC_tTOF_R6.d	Round_robin_experiment	PYE9_A	G	DIA	nLC_tTOF	6	DIANN;FragPipe	G9_nLC_tTOF_report.tsv							G9_nLC_tTOF_fragpipe_report.tsv
B1_G_DDA_nLC_tTOF_R1.d	Round_robin_experiment	PYE1_B	G	DDA	nLC_tTOF	1	MaxQuant;FragPipe		G1_nLC_tTOF_evidence.txt	G1_nLC_tTOF_peptides.txt	G1_nLC_tTOF_proteinGroups.txt	G1_nLC_tTOF_fragpipe_combined_ion.tsv	G1_nLC_tTOF_fragpipe_combined_peptide.tsv	G1_nLC_tTOF_fragpipe_combined_protein.tsv
B1_G_DDA_nLC_tTOF_R2.d	Round_robin_experiment	PYE1_B	G	DDA	nLC_tTOF	2	MaxQuant;FragPipe		G1_nLC_tTOF_evidence.txt	G1_nLC_tTOF_peptides.txt	G1_nLC_tTOF_proteinGroups.txt	G1_nLC_tTOF_fragpipe_combined_ion.tsv	G1_nLC_tTOF_fragpipe_combined_peptide.tsv	G1_nLC_tTOF_fragpipe_combined_protein.tsv
B1_G_DDA_nLC_tTOF_R3.d	Round_robin_experiment	PYE1_B	G	DDA	nLC_tTOF	3	MaxQuant;FragPipe		G1_nLC_tTOF_evidence.txt	G1_nLC_tTOF_peptides.txt	G1_nLC_tTOF_proteinGroups.txt	G1_nLC_tTOF_fragpipe_combined_ion.tsv	G1_nLC_tTOF_fragpipe_combined_peptide.tsv	G1_nLC_tTOF_fragpipe_combined_protein.tsv
B1_G_DDA_nLC_tTOF_R4.d	Round_robin_experiment	PYE1_B	G	DDA	nLC_tTOF	4	MaxQuant;FragPipe		G1_nLC_tTOF_evidence.txt	G1_nLC_tTOF_peptides.txt	G1_nLC_tTOF_proteinGroups.txt	G1_nLC_tTOF_fragpipe_combined_ion.tsv	G1_nLC_tTOF_fragpipe_combined_peptide.tsv	G1_nLC_tTOF_fragpipe_combined_protein.tsv
B1_G_DDA_nLC_tTOF_R5.d	Round_robin_experiment	PYE1_B	G	DDA	nLC_tTOF	5	MaxQuant;FragPipe		G1_nLC_tTOF_evidence.txt	G1_nLC_tTOF_peptides.txt	G1_nLC_tTOF_proteinGroups.txt	G1_nLC_tTOF_fragpipe_combined_ion.tsv	G1_nLC_tTOF_fragpipe_combined_peptide.tsv	G1_nLC_tTOF_fragpipe_combined_protein.tsv
B1_G_DDA_nLC_tTOF_R6.d	Round_robin_experiment	PYE1_B	G	DDA	nLC_tTOF	6	MaxQuant;FragPipe		G1_nLC_tTOF_evidence.txt	G1_nLC_tTOF_peptides.txt	G1_nLC_tTOF_proteinGroups.txt	G1_nLC_tTOF_fragpipe_combined_ion.tsv	G1_nLC_tTOF_fragpipe_combined_peptide.tsv	G1_nLC_tTOF_fragpipe_combined_protein.tsv
B1_G_DIA_nLC_tTOF_R1.d	Round_robin_experiment	PYE1_B	G	DIA	nLC_tTOF	1	DIANN;FragPipe	G1_nLC_tTOF_report.tsv							G1_nLC_tTOF_fragpipe_report.tsv
B1_G_DIA_nLC_tTOF_R2.d	Round_robin_experiment	PYE1_B	G	DIA	nLC_tTOF	2	DIANN;FragPipe	G1_nLC_tTOF_report.tsv							G1_nLC_tTOF_fragpipe_report.tsv
B1_G_DIA_nLC_tTOF_R3.d	Round_robin_experiment	PYE1_B	G	DIA	nLC_tTOF	3	DIANN;FragPipe	G1_nLC_tTOF_report.tsv							G1_nLC_tTOF_fragpipe_report.tsv
B1_G_DIA_nLC_tTOF_R4.d	Round_robin_experiment	PYE1_B	G	DIA	nLC_tTOF	4	DIANN;FragPipe	G1_nLC_tTOF_report.tsv							G1_nLC_tTOF_fragpipe_report.tsv
B1_G_DIA_nLC_tTOF_R5.d	Round_robin_experiment	PYE1_B	G	DIA	nLC_tTOF	5	DIANN;FragPipe	G1_nLC_tTOF_report.tsv							G1_nLC_tTOF_fragpipe_report.tsv
B1_G_DIA_nLC_tTOF_R6.d	Round_robin_experiment	PYE1_B	G	DIA	nLC_tTOF	6	DIANN;FragPipe	G1_nLC_tTOF_report.tsv							G1_nLC_tTOF_fragpipe_report.tsv
B3_G_DDA_nLC_tTOF_R1.d	Round_robin_experiment	PYE3_B	G	DDA	nLC_tTOF	1	MaxQuant;FragPipe		G3_nLC_tTOF_evidence.txt	G3_nLC_tTOF_peptides.txt	G3_nLC_tTOF_proteinGroups.txt	G3_nLC_tTOF_fragpipe_combined_ion.tsv	G3_nLC_tTOF_fragpipe_combined_peptide.tsv	G3_nLC_tTOF_fragpipe_combined_protein.tsv
B3_G_DDA_nLC_tTOF_R2.d	Round_robin_experiment	PYE3_B	G	DDA	nLC_tTOF	2	MaxQuant;FragPipe		G3_nLC_tTOF_evidence.txt	G3_nLC_tTOF_peptides.txt	G3_nLC_tTOF_proteinGroups.txt	G3_nLC_tTOF_fragpipe_combined_ion.tsv	G3_nLC_tTOF_fragpipe_combined_peptide.tsv	G3_nLC_tTOF_fragpipe_combined_protein.tsv
B3_G_DDA_nLC_tTOF_R3.d	Round_robin_experiment	PYE3_B	G	DDA	nLC_tTOF	3	MaxQuant;FragPipe		G3_nLC_tTOF_evidence.txt	G3_nLC_tTOF_peptides.txt	G3_nLC_tTOF_proteinGroups.txt	G3_nLC_tTOF_fragpipe_combined_ion.tsv	G3_nLC_tTOF_fragpipe_combined_peptide.tsv	G3_nLC_tTOF_fragpipe_combined_protein.tsv
B3_G_DDA_nLC_tTOF_R4.d	Round_robin_experiment	PYE3_B	G	DDA	nLC_tTOF	4	MaxQuant;FragPipe		G3_nLC_tTOF_evidence.txt	G3_nLC_tTOF_peptides.txt	G3_nLC_tTOF_proteinGroups.txt	G3_nLC_tTOF_fragpipe_combined_ion.tsv	G3_nLC_tTOF_fragpipe_combined_peptide.tsv	G3_nLC_tTOF_fragpipe_combined_protein.tsv
B3_G_DDA_nLC_tTOF_R5.d	Round_robin_experiment	PYE3_B	G	DDA	nLC_tTOF	5	MaxQuant;FragPipe		G3_nLC_tTOF_evidence.txt	G3_nLC_tTOF_peptides.txt	G3_nLC_tTOF_proteinGroups.txt	G3_nLC_tTOF_fragpipe_combined_ion.tsv	G3_nLC_tTOF_fragpipe_combined_peptide.tsv	G3_nLC_tTOF_fragpipe_combined_protein.tsv
B3_G_DDA_nLC_tTOF_R6.d	Round_robin_experiment	PYE3_B	G	DDA	nLC_tTOF	6	MaxQuant;FragPipe		G3_nLC_tTOF_evidence.txt	G3_nLC_tTOF_peptides.txt	G3_nLC_tTOF_proteinGroups.txt	G3_nLC_tTOF_fragpipe_combined_ion.tsv	G3_nLC_tTOF_fragpipe_combined_peptide.tsv	G3_nLC_tTOF_fragpipe_combined_protein.tsv
B3_G_DIA_nLC_tTOF_R1.d	Round_robin_experiment	PYE3_B	G	DIA	nLC_tTOF	1	DIANN;FragPipe	G3_nLC_tTOF_report.tsv							G3_nLC_tTOF_fragpipe_report.tsv
B3_G_DIA_nLC_tTOF_R2.d	Round_robin_experiment	PYE3_B	G	DIA	nLC_tTOF	2	DIANN;FragPipe	G3_nLC_tTOF_report.tsv							G3_nLC_tTOF_fragpipe_report.tsv
B3_G_DIA_nLC_tTOF_R3.d	Round_robin_experiment	PYE3_B	G	DIA	nLC_tTOF	3	DIANN;FragPipe	G3_nLC_tTOF_report.tsv							G3_nLC_tTOF_fragpipe_report.tsv
B3_G_DIA_nLC_tTOF_R4.d	Round_robin_experiment	PYE3_B	G	DIA	nLC_tTOF	4	DIANN;FragPipe	G3_nLC_tTOF_report.tsv							G3_nLC_tTOF_fragpipe_report.tsv
B3_G_DIA_nLC_tTOF_R5.d	Round_robin_experiment	PYE3_B	G	DIA	nLC_tTOF	5	DIANN;FragPipe	G3_nLC_tTOF_report.tsv							G3_nLC_tTOF_fragpipe_report.tsv
B3_G_DIA_nLC_tTOF_R6.d	Round_robin_experiment	PYE3_B	G	DIA	nLC_tTOF	6	DIANN;FragPipe	G3_nLC_tTOF_report.tsv							G3_nLC_tTOF_fragpipe_report.tsv
B9_G_DDA_nLC_tTOF_R1.d	Round_robin_experiment	PYE9_B	G	DDA	nLC_tTOF	1	MaxQuant;FragPipe		G9_nLC_tTOF_evidence.txt	G9_nLC_tTOF_peptides.txt	G9_nLC_tTOF_proteinGroups.txt	G9_nLC_tTOF_fragpipe_combined_ion.tsv	G9_nLC_tTOF_fragpipe_combined_peptide.tsv	G9_nLC_tTOF_fragpipe_combined_protein.tsv
B9_G_DDA_nLC_tTOF_R2.d	Round_robin_experiment	PYE9_B	G	DDA	nLC_tTOF	2	MaxQuant;FragPipe		G9_nLC_tTOF_evidence.txt	G9_nLC_tTOF_peptides.txt	G9_nLC_tTOF_proteinGroups.txt	G9_nLC_tTOF_fragpipe_combined_ion.tsv	G9_nLC_tTOF_fragpipe_combined_peptide.tsv	G9_nLC_tTOF_fragpipe_combined_protein.tsv
B9_G_DDA_nLC_tTOF_R3.d	Round_robin_experiment	PYE9_B	G	DDA	nLC_tTOF	3	MaxQuant;FragPipe		G9_nLC_tTOF_evidence.txt	G9_nLC_tTOF_peptides.txt	G9_nLC_tTOF_proteinGroups.txt	G9_nLC_tTOF_fragpipe_combined_ion.tsv	G9_nLC_tTOF_fragpipe_combined_peptide.tsv	G9_nLC_tTOF_fragpipe_combined_protein.tsv
B9_G_DDA_nLC_tTOF_R4.d	Round_robin_experiment	PYE9_B	G	DDA	nLC_tTOF	4	MaxQuant;FragPipe		G9_nLC_tTOF_evidence.txt	G9_nLC_tTOF_peptides.txt	G9_nLC_tTOF_proteinGroups.txt	G9_nLC_tTOF_fragpipe_combined_ion.tsv	G9_nLC_tTOF_fragpipe_combined_peptide.tsv	G9_nLC_tTOF_fragpipe_combined_protein.tsv
B9_G_DDA_nLC_tTOF_R5.d	Round_robin_experiment	PYE9_B	G	DDA	nLC_tTOF	5	MaxQuant;FragPipe		G9_nLC_tTOF_evidence.txt	G9_nLC_tTOF_peptides.txt	G9_nLC_tTOF_proteinGroups.txt	G9_nLC_tTOF_fragpipe_combined_ion.tsv	G9_nLC_tTOF_fragpipe_combined_peptide.tsv	G9_nLC_tTOF_fragpipe_combined_protein.tsv
B9_G_DDA_nLC_tTOF_R6.d	Round_robin_experiment	PYE9_B	G	DDA	nLC_tTOF	6	MaxQuant;FragPipe		G9_nLC_tTOF_evidence.txt	G9_nLC_tTOF_peptides.txt	G9_nLC_tTOF_proteinGroups.txt	G9_nLC_tTOF_fragpipe_combined_ion.tsv	G9_nLC_tTOF_fragpipe_combined_peptide.tsv	G9_nLC_tTOF_fragpipe_combined_protein.tsv
B9_G_DIA_nLC_tTOF_R1.d	Round_robin_experiment	PYE9_B	G	DIA	nLC_tTOF	1	DIANN;FragPipe	G9_nLC_tTOF_report.tsv							G9_nLC_tTOF_fragpipe_report.tsv
B9_G_DIA_nLC_tTOF_R2.d	Round_robin_experiment	PYE9_B	G	DIA	nLC_tTOF	2	DIANN;FragPipe	G9_nLC_tTOF_report.tsv							G9_nLC_tTOF_fragpipe_report.tsv
B9_G_DIA_nLC_tTOF_R3.d	Round_robin_experiment	PYE9_B	G	DIA	nLC_tTOF	3	DIANN;FragPipe	G9_nLC_tTOF_report.tsv							G9_nLC_tTOF_fragpipe_report.tsv
B9_G_DIA_nLC_tTOF_R4.d	Round_robin_experiment	PYE9_B	G	DIA	nLC_tTOF	4	DIANN;FragPipe	G9_nLC_tTOF_report.tsv							G9_nLC_tTOF_fragpipe_report.tsv
B9_G_DIA_nLC_tTOF_R5.d	Round_robin_experiment	PYE9_B	G	DIA	nLC_tTOF	5	DIANN;FragPipe	G9_nLC_tTOF_report.tsv							G9_nLC_tTOF_fragpipe_report.tsv
B9_G_DIA_nLC_tTOF_R6.d	Round_robin_experiment	PYE9_B	G	DIA	nLC_tTOF	6	DIANN;FragPipe	G9_nLC_tTOF_report.tsv							G9_nLC_tTOF_fragpipe_report.tsv
A1_C_DDA_nE_tTOF_R1.d	Round_robin_experiment	PYE1_A	C	DDA	nE_tTOF	1	MaxQuant;FragPipe		C1_nE_tTOF_evidence.txt	C1_nE_tTOF_peptides.txt	C1_nE_tTOF_proteinGroups.txt	C1_nE_tTOF_fragpipe_combined_ion.tsv	C1_nE_tTOF_fragpipe_combined_peptide.tsv	C1_nE_tTOF_fragpipe_combined_protein.tsv
A1_C_DDA_nE_tTOF_R2.d	Round_robin_experiment	PYE1_A	C	DDA	nE_tTOF	2	MaxQuant;FragPipe		C1_nE_tTOF_evidence.txt	C1_nE_tTOF_peptides.txt	C1_nE_tTOF_proteinGroups.txt	C1_nE_tTOF_fragpipe_combined_ion.tsv	C1_nE_tTOF_fragpipe_combined_peptide.tsv	C1_nE_tTOF_fragpipe_combined_protein.tsv
A1_C_DDA_nE_tTOF_R3.d	Round_robin_experiment	PYE1_A	C	DDA	nE_tTOF	3	MaxQuant;FragPipe		C1_nE_tTOF_evidence.txt	C1_nE_tTOF_peptides.txt	C1_nE_tTOF_proteinGroups.txt	C1_nE_tTOF_fragpipe_combined_ion.tsv	C1_nE_tTOF_fragpipe_combined_peptide.tsv	C1_nE_tTOF_fragpipe_combined_protein.tsv
A1_C_DDA_nE_tTOF_R4.d	Round_robin_experiment	PYE1_A	C	DDA	nE_tTOF	4	MaxQuant;FragPipe		C1_nE_tTOF_evidence.txt	C1_nE_tTOF_peptides.txt	C1_nE_tTOF_proteinGroups.txt	C1_nE_tTOF_fragpipe_combined_ion.tsv	C1_nE_tTOF_fragpipe_combined_peptide.tsv	C1_nE_tTOF_fragpipe_combined_protein.tsv
A1_C_DDA_nE_tTOF_R5.d	Round_robin_experiment	PYE1_A	C	DDA	nE_tTOF	5	MaxQuant;FragPipe		C1_nE_tTOF_evidence.txt	C1_nE_tTOF_peptides.txt	C1_nE_tTOF_proteinGroups.txt	C1_nE_tTOF_fragpipe_combined_ion.tsv	C1_nE_tTOF_fragpipe_combined_peptide.tsv	C1_nE_tTOF_fragpipe_combined_protein.tsv
A1_C_DDA_nE_tTOF_R6.d	Round_robin_experiment	PYE1_A	C	DDA	nE_tTOF	6	MaxQuant;FragPipe		C1_nE_tTOF_evidence.txt	C1_nE_tTOF_peptides.txt	C1_nE_tTOF_proteinGroups.txt	C1_nE_tTOF_fragpipe_combined_ion.tsv	C1_nE_tTOF_fragpipe_combined_peptide.tsv	C1_nE_tTOF_fragpipe_combined_protein.tsv
A1_C_DIA_nE_tTOF_R1.d	Round_robin_experiment	PYE1_A	C	DIA	nE_tTOF	1	DIANN;FragPipe	C1_nE_tTOF_report.tsv							C1_nE_tTOF_fragpipe_report.tsv
A1_C_DIA_nE_tTOF_R2.d	Round_robin_experiment	PYE1_A	C	DIA	nE_tTOF	2	DIANN;FragPipe	C1_nE_tTOF_report.tsv							C1_nE_tTOF_fragpipe_report.tsv
A1_C_DIA_nE_tTOF_R3.d	Round_robin_experiment	PYE1_A	C	DIA	nE_tTOF	3	DIANN;FragPipe	C1_nE_tTOF_report.tsv							C1_nE_tTOF_fragpipe_report.tsv
A1_C_DIA_nE_tTOF_R4.d	Round_robin_experiment	PYE1_A	C	DIA	nE_tTOF	4	DIANN;FragPipe	C1_nE_tTOF_report.tsv							C1_nE_tTOF_fragpipe_report.tsv
A1_C_DIA_nE_tTOF_R5.d	Round_robin_experiment	PYE1_A	C	DIA	nE_tTOF	5	DIANN;FragPipe	C1_nE_tTOF_report.tsv							C1_nE_tTOF_fragpipe_report.tsv
A1_C_DIA_nE_tTOF_R6.d	Round_robin_experiment	PYE1_A	C	DIA	nE_tTOF	6	DIANN;FragPipe	C1_nE_tTOF_report.tsv							C1_nE_tTOF_fragpipe_report.tsv
A3_C_DDA_nE_tTOF_R1.d	Round_robin_experiment	PYE3_A	C	DDA	nE_tTOF	1	MaxQuant;FragPipe		C3_nE_tTOF_evidence.txt	C3_nE_tTOF_peptides.txt	C3_nE_tTOF_proteinGroups.txt	C3_nE_tTOF_fragpipe_combined_ion.tsv	C3_nE_tTOF_fragpipe_combined_peptide.tsv	C3_nE_tTOF_fragpipe_combined_protein.tsv
A3_C_DDA_nE_tTOF_R2.d	Round_robin_experiment	PYE3_A	C	DDA	nE_tTOF	2	MaxQuant;FragPipe		C3_nE_tTOF_evidence.txt	C3_nE_tTOF_peptides.txt	C3_nE_tTOF_proteinGroups.txt	C3_nE_tTOF_fragpipe_combined_ion.tsv	C3_nE_tTOF_fragpipe_combined_peptide.tsv	C3_nE_tTOF_fragpipe_combined_protein.tsv
A3_C_DDA_nE_tTOF_R3.d	Round_robin_experiment	PYE3_A	C	DDA	nE_tTOF	3	MaxQuant;FragPipe		C3_nE_tTOF_evidence.txt	C3_nE_tTOF_peptides.txt	C3_nE_tTOF_proteinGroups.txt	C3_nE_tTOF_fragpipe_combined_ion.tsv	C3_nE_tTOF_fragpipe_combined_peptide.tsv	C3_nE_tTOF_fragpipe_combined_protein.tsv
A3_C_DDA_nE_tTOF_R4.d	Round_robin_experiment	PYE3_A	C	DDA	nE_tTOF	4	MaxQuant;FragPipe		C3_nE_tTOF_evidence.txt	C3_nE_tTOF_peptides.txt	C3_nE_tTOF_proteinGroups.txt	C3_nE_tTOF_fragpipe_combined_ion.tsv	C3_nE_tTOF_fragpipe_combined_peptide.tsv	C3_nE_tTOF_fragpipe_combined_protein.tsv
A3_C_DDA_nE_tTOF_R5.d	Round_robin_experiment	PYE3_A	C	DDA	nE_tTOF	5	MaxQuant;FragPipe		C3_nE_tTOF_evidence.txt	C3_nE_tTOF_peptides.txt	C3_nE_tTOF_proteinGroups.txt	C3_nE_tTOF_fragpipe_combined_ion.tsv	C3_nE_tTOF_fragpipe_combined_peptide.tsv	C3_nE_tTOF_fragpipe_combined_protein.tsv
A3_C_DDA_nE_tTOF_R6.d	Round_robin_experiment	PYE3_A	C	DDA	nE_tTOF	6	MaxQuant;FragPipe		C3_nE_tTOF_evidence.txt	C3_nE_tTOF_peptides.txt	C3_nE_tTOF_proteinGroups.txt	C3_nE_tTOF_fragpipe_combined_ion.tsv	C3_nE_tTOF_fragpipe_combined_peptide.tsv	C3_nE_tTOF_fragpipe_combined_protein.tsv
A3_C_DIA_nE_tTOF_R1.d	Round_robin_experiment	PYE3_A	C	DIA	nE_tTOF	1	DIANN;FragPipe	C3_nE_tTOF_report.tsv							C3_nE_tTOF_fragpipe_report.tsv
A3_C_DIA_nE_tTOF_R2.d	Round_robin_experiment	PYE3_A	C	DIA	nE_tTOF	2	DIANN;FragPipe	C3_nE_tTOF_report.tsv							C3_nE_tTOF_fragpipe_report.tsv
A3_C_DIA_nE_tTOF_R3.d	Round_robin_experiment	PYE3_A	C	DIA	nE_tTOF	3	DIANN;FragPipe	C3_nE_tTOF_report.tsv							C3_nE_tTOF_fragpipe_report.tsv
A3_C_DIA_nE_tTOF_R4.d	Round_robin_experiment	PYE3_A	C	DIA	nE_tTOF	4	DIANN;FragPipe	C3_nE_tTOF_report.tsv							C3_nE_tTOF_fragpipe_report.tsv
A3_C_DIA_nE_tTOF_R5.d	Round_robin_experiment	PYE3_A	C	DIA	nE_tTOF	5	DIANN;FragPipe	C3_nE_tTOF_report.tsv							C3_nE_tTOF_fragpipe_report.tsv
A3_C_DIA_nE_tTOF_R6.d	Round_robin_experiment	PYE3_A	C	DIA	nE_tTOF	6	DIANN;FragPipe	C3_nE_tTOF_report.tsv							C3_nE_tTOF_fragpipe_report.tsv
A9_C_DDA_nE_tTOF_R1.d	Round_robin_experiment	PYE9_A	C	DDA	nE_tTOF	1	MaxQuant;FragPipe		C9_nE_tTOF_evidence.txt	C9_nE_tTOF_peptides.txt	C9_nE_tTOF_proteinGroups.txt	C9_nE_tTOF_fragpipe_combined_ion.tsv	C9_nE_tTOF_fragpipe_combined_peptide.tsv	C9_nE_tTOF_fragpipe_combined_protein.tsv
A9_C_DDA_nE_tTOF_R2.d	Round_robin_experiment	PYE9_A	C	DDA	nE_tTOF	2	MaxQuant;FragPipe		C9_nE_tTOF_evidence.txt	C9_nE_tTOF_peptides.txt	C9_nE_tTOF_proteinGroups.txt	C9_nE_tTOF_fragpipe_combined_ion.tsv	C9_nE_tTOF_fragpipe_combined_peptide.tsv	C9_nE_tTOF_fragpipe_combined_protein.tsv
A9_C_DDA_nE_tTOF_R3.d	Round_robin_experiment	PYE9_A	C	DDA	nE_tTOF	3	MaxQuant;FragPipe		C9_nE_tTOF_evidence.txt	C9_nE_tTOF_peptides.txt	C9_nE_tTOF_proteinGroups.txt	C9_nE_tTOF_fragpipe_combined_ion.tsv	C9_nE_tTOF_fragpipe_combined_peptide.tsv	C9_nE_tTOF_fragpipe_combined_protein.tsv
A9_C_DDA_nE_tTOF_R4.d	Round_robin_experiment	PYE9_A	C	DDA	nE_tTOF	4	MaxQuant;FragPipe		C9_nE_tTOF_evidence.txt	C9_nE_tTOF_peptides.txt	C9_nE_tTOF_proteinGroups.txt	C9_nE_tTOF_fragpipe_combined_ion.tsv	C9_nE_tTOF_fragpipe_combined_peptide.tsv	C9_nE_tTOF_fragpipe_combined_protein.tsv
A9_C_DDA_nE_tTOF_R5.d	Round_robin_experiment	PYE9_A	C	DDA	nE_tTOF	5	MaxQuant;FragPipe		C9_nE_tTOF_evidence.txt	C9_nE_tTOF_peptides.txt	C9_nE_tTOF_proteinGroups.txt	C9_nE_tTOF_fragpipe_combined_ion.tsv	C9_nE_tTOF_fragpipe_combined_peptide.tsv	C9_nE_tTOF_fragpipe_combined_protein.tsv
A9_C_DDA_nE_tTOF_R6.d	Round_robin_experiment	PYE9_A	C	DDA	nE_tTOF	6	MaxQuant;FragPipe		C9_nE_tTOF_evidence.txt	C9_nE_tTOF_peptides.txt	C9_nE_tTOF_proteinGroups.txt	C9_nE_tTOF_fragpipe_combined_ion.tsv	C9_nE_tTOF_fragpipe_combined_peptide.tsv	C9_nE_tTOF_fragpipe_combined_protein.tsv
A9_C_DIA_nE_tTOF_R1.d	Round_robin_experiment	PYE9_A	C	DIA	nE_tTOF	1	DIANN;FragPipe	C9_nE_tTOF_report.tsv							C9_nE_tTOF_fragpipe_report.tsv
A9_C_DIA_nE_tTOF_R2.d	Round_robin_experiment	PYE9_A	C	DIA	nE_tTOF	2	DIANN;FragPipe	C9_nE_tTOF_report.tsv							C9_nE_tTOF_fragpipe_report.tsv
A9_C_DIA_nE_tTOF_R3.d	Round_robin_experiment	PYE9_A	C	DIA	nE_tTOF	3	DIANN;FragPipe	C9_nE_tTOF_report.tsv							C9_nE_tTOF_fragpipe_report.tsv
A9_C_DIA_nE_tTOF_R4.d	Round_robin_experiment	PYE9_A	C	DIA	nE_tTOF	4	DIANN;FragPipe	C9_nE_tTOF_report.tsv							C9_nE_tTOF_fragpipe_report.tsv
A9_C_DIA_nE_tTOF_R5.d	Round_robin_experiment	PYE9_A	C	DIA	nE_tTOF	5	DIANN;FragPipe	C9_nE_tTOF_report.tsv							C9_nE_tTOF_fragpipe_report.tsv
A9_C_DIA_nE_tTOF_R6.d	Round_robin_experiment	PYE9_A	C	DIA	nE_tTOF	6	DIANN;FragPipe	C9_nE_tTOF_report.tsv							C9_nE_tTOF_fragpipe_report.tsv
B1_C_DDA_nE_tTOF_R1.d	Round_robin_experiment	PYE1_B	C	DDA	nE_tTOF	1	MaxQuant;FragPipe		C1_nE_tTOF_evidence.txt	C1_nE_tTOF_peptides.txt	C1_nE_tTOF_proteinGroups.txt	C1_nE_tTOF_fragpipe_combined_ion.tsv	C1_nE_tTOF_fragpipe_combined_peptide.tsv	C1_nE_tTOF_fragpipe_combined_protein.tsv
B1_C_DDA_nE_tTOF_R2.d	Round_robin_experiment	PYE1_B	C	DDA	nE_tTOF	2	MaxQuant;FragPipe		C1_nE_tTOF_evidence.txt	C1_nE_tTOF_peptides.txt	C1_nE_tTOF_proteinGroups.txt	C1_nE_tTOF_fragpipe_combined_ion.tsv	C1_nE_tTOF_fragpipe_combined_peptide.tsv	C1_nE_tTOF_fragpipe_combined_protein.tsv
B1_C_DDA_nE_tTOF_R3.d	Round_robin_experiment	PYE1_B	C	DDA	nE_tTOF	3	MaxQuant;FragPipe		C1_nE_tTOF_evidence.txt	C1_nE_tTOF_peptides.txt	C1_nE_tTOF_proteinGroups.txt	C1_nE_tTOF_fragpipe_combined_ion.tsv	C1_nE_tTOF_fragpipe_combined_peptide.tsv	C1_nE_tTOF_fragpipe_combined_protein.tsv
B1_C_DDA_nE_tTOF_R4.d	Round_robin_experiment	PYE1_B	C	DDA	nE_tTOF	4	MaxQuant;FragPipe		C1_nE_tTOF_evidence.txt	C1_nE_tTOF_peptides.txt	C1_nE_tTOF_proteinGroups.txt	C1_nE_tTOF_fragpipe_combined_ion.tsv	C1_nE_tTOF_fragpipe_combined_peptide.tsv	C1_nE_tTOF_fragpipe_combined_protein.tsv
B1_C_DDA_nE_tTOF_R5.d	Round_robin_experiment	PYE1_B	C	DDA	nE_tTOF	5	MaxQuant;FragPipe		C1_nE_tTOF_evidence.txt	C1_nE_tTOF_peptides.txt	C1_nE_tTOF_proteinGroups.txt	C1_nE_tTOF_fragpipe_combined_ion.tsv	C1_nE_tTOF_fragpipe_combined_peptide.tsv	C1_nE_tTOF_fragpipe_combined_protein.tsv
B1_C_DDA_nE_tTOF_R6.d	Round_robin_experiment	PYE1_B	C	DDA	nE_tTOF	6	MaxQuant;FragPipe		C1_nE_tTOF_evidence.txt	C1_nE_tTOF_peptides.txt	C1_nE_tTOF_proteinGroups.txt	C1_nE_tTOF_fragpipe_combined_ion.tsv	C1_nE_tTOF_fragpipe_combined_peptide.tsv	C1_nE_tTOF_fragpipe_combined_protein.tsv
B3_C_DDA_nE_tTOF_R1.d	Round_robin_experiment	PYE3_B	C	DDA	nE_tTOF	1	MaxQuant;FragPipe		C3_nE_tTOF_evidence.txt	C3_nE_tTOF_peptides.txt	C3_nE_tTOF_proteinGroups.txt	C3_nE_tTOF_fragpipe_combined_ion.tsv	C3_nE_tTOF_fragpipe_combined_peptide.tsv	C3_nE_tTOF_fragpipe_combined_protein.tsv
B3_C_DDA_nE_tTOF_R2.d	Round_robin_experiment	PYE3_B	C	DDA	nE_tTOF	2	MaxQuant;FragPipe		C3_nE_tTOF_evidence.txt	C3_nE_tTOF_peptides.txt	C3_nE_tTOF_proteinGroups.txt	C3_nE_tTOF_fragpipe_combined_ion.tsv	C3_nE_tTOF_fragpipe_combined_peptide.tsv	C3_nE_tTOF_fragpipe_combined_protein.tsv
B3_C_DDA_nE_tTOF_R3.d	Round_robin_experiment	PYE3_B	C	DDA	nE_tTOF	3	MaxQuant;FragPipe		C3_nE_tTOF_evidence.txt	C3_nE_tTOF_peptides.txt	C3_nE_tTOF_proteinGroups.txt	C3_nE_tTOF_fragpipe_combined_ion.tsv	C3_nE_tTOF_fragpipe_combined_peptide.tsv	C3_nE_tTOF_fragpipe_combined_protein.tsv
B3_C_DDA_nE_tTOF_R4.d	Round_robin_experiment	PYE3_B	C	DDA	nE_tTOF	4	MaxQuant;FragPipe		C3_nE_tTOF_evidence.txt	C3_nE_tTOF_peptides.txt	C3_nE_tTOF_proteinGroups.txt	C3_nE_tTOF_fragpipe_combined_ion.tsv	C3_nE_tTOF_fragpipe_combined_peptide.tsv	C3_nE_tTOF_fragpipe_combined_protein.tsv
B3_C_DDA_nE_tTOF_R5.d	Round_robin_experiment	PYE3_B	C	DDA	nE_tTOF	5	MaxQuant;FragPipe		C3_nE_tTOF_evidence.txt	C3_nE_tTOF_peptides.txt	C3_nE_tTOF_proteinGroups.txt	C3_nE_tTOF_fragpipe_combined_ion.tsv	C3_nE_tTOF_fragpipe_combined_peptide.tsv	C3_nE_tTOF_fragpipe_combined_protein.tsv
B3_C_DDA_nE_tTOF_R6.d	Round_robin_experiment	PYE3_B	C	DDA	nE_tTOF	6	MaxQuant;FragPipe		C3_nE_tTOF_evidence.txt	C3_nE_tTOF_peptides.txt	C3_nE_tTOF_proteinGroups.txt	C3_nE_tTOF_fragpipe_combined_ion.tsv	C3_nE_tTOF_fragpipe_combined_peptide.tsv	C3_nE_tTOF_fragpipe_combined_protein.tsv
B9_C_DDA_nE_tTOF_R1.d	Round_robin_experiment	PYE9_B	C	DDA	nE_tTOF	1	MaxQuant;FragPipe		C9_nE_tTOF_evidence.txt	C9_nE_tTOF_peptides.txt	C9_nE_tTOF_proteinGroups.txt	C9_nE_tTOF_fragpipe_combined_ion.tsv	C9_nE_tTOF_fragpipe_combined_peptide.tsv	C9_nE_tTOF_fragpipe_combined_protein.tsv
B9_C_DDA_nE_tTOF_R2.d	Round_robin_experiment	PYE9_B	C	DDA	nE_tTOF	2	MaxQuant;FragPipe		C9_nE_tTOF_evidence.txt	C9_nE_tTOF_peptides.txt	C9_nE_tTOF_proteinGroups.txt	C9_nE_tTOF_fragpipe_combined_ion.tsv	C9_nE_tTOF_fragpipe_combined_peptide.tsv	C9_nE_tTOF_fragpipe_combined_protein.tsv
B9_C_DDA_nE_tTOF_R3.d	Round_robin_experiment	PYE9_B	C	DDA	nE_tTOF	3	MaxQuant;FragPipe		C9_nE_tTOF_evidence.txt	C9_nE_tTOF_peptides.txt	C9_nE_tTOF_proteinGroups.txt	C9_nE_tTOF_fragpipe_combined_ion.tsv	C9_nE_tTOF_fragpipe_combined_peptide.tsv	C9_nE_tTOF_fragpipe_combined_protein.tsv
B9_C_DDA_nE_tTOF_R4.d	Round_robin_experiment	PYE9_B	C	DDA	nE_tTOF	4	MaxQuant;FragPipe		C9_nE_tTOF_evidence.txt	C9_nE_tTOF_peptides.txt	C9_nE_tTOF_proteinGroups.txt	C9_nE_tTOF_fragpipe_combined_ion.tsv	C9_nE_tTOF_fragpipe_combined_peptide.tsv	C9_nE_tTOF_fragpipe_combined_protein.tsv
B9_C_DDA_nE_tTOF_R5.d	Round_robin_experiment	PYE9_B	C	DDA	nE_tTOF	5	MaxQuant;FragPipe		C9_nE_tTOF_evidence.txt	C9_nE_tTOF_peptides.txt	C9_nE_tTOF_proteinGroups.txt	C9_nE_tTOF_fragpipe_combined_ion.tsv	C9_nE_tTOF_fragpipe_combined_peptide.tsv	C9_nE_tTOF_fragpipe_combined_protein.tsv
B9_C_DDA_nE_tTOF_R6.d	Round_robin_experiment	PYE9_B	C	DDA	nE_tTOF	6	MaxQuant;FragPipe		C9_nE_tTOF_evidence.txt	C9_nE_tTOF_peptides.txt	C9_nE_tTOF_proteinGroups.txt	C9_nE_tTOF_fragpipe_combined_ion.tsv	C9_nE_tTOF_fragpipe_combined_peptide.tsv	C9_nE_tTOF_fragpipe_combined_protein.tsv
A9_L_DIA_nE_tTOF_R1.d	Round_robin_experiment	PYE9_A	L	DIA	nE_tTOF	1	DIANN;FragPipe	L9_nE_tTOF_report.tsv							L9_nE_tTOF_fragpipe_report.tsv
B9_L_DIA_nE_tTOF_R1.d	Round_robin_experiment	PYE9_B	L	DIA	nE_tTOF	1	DIANN;FragPipe	L9_nE_tTOF_report.tsv							L9_nE_tTOF_fragpipe_report.tsv
A9_L_DIA_nE_tTOF_R2.d	Round_robin_experiment	PYE9_A	L	DIA	nE_tTOF	2	DIANN;FragPipe	L9_nE_tTOF_report.tsv							L9_nE_tTOF_fragpipe_report.tsv
B9_L_DIA_nE_tTOF_R2.d	Round_robin_experiment	PYE9_B	L	DIA	nE_tTOF	2	DIANN;FragPipe	L9_nE_tTOF_report.tsv							L9_nE_tTOF_fragpipe_report.tsv
A9_L_DIA_nE_tTOF_R3.d	Round_robin_experiment	PYE9_A	L	DIA	nE_tTOF	3	DIANN;FragPipe	L9_nE_tTOF_report.tsv							L9_nE_tTOF_fragpipe_report.tsv
B9_L_DIA_nE_tTOF_R3.d	Round_robin_experiment	PYE9_B	L	DIA	nE_tTOF	3	DIANN;FragPipe	L9_nE_tTOF_report.tsv							L9_nE_tTOF_fragpipe_report.tsv
A3_L_DIA_nE_tTOF_R1.d	Round_robin_experiment	PYE3_A	L	DIA	nE_tTOF	1	DIANN;FragPipe	L3_nE_tTOF_report.tsv							L3_nE_tTOF_fragpipe_report.tsv
B3_L_DIA_nE_tTOF_R1.d	Round_robin_experiment	PYE3_B	L	DIA	nE_tTOF	1	DIANN;FragPipe	L3_nE_tTOF_report.tsv							L3_nE_tTOF_fragpipe_report.tsv
A3_L_DIA_nE_tTOF_R2.d	Round_robin_experiment	PYE3_A	L	DIA	nE_tTOF	2	DIANN;FragPipe	L3_nE_tTOF_report.tsv							L3_nE_tTOF_fragpipe_report.tsv
B3_L_DIA_nE_tTOF_R2.d	Round_robin_experiment	PYE3_B	L	DIA	nE_tTOF	2	DIANN;FragPipe	L3_nE_tTOF_report.tsv							L3_nE_tTOF_fragpipe_report.tsv
A3_L_DIA_nE_tTOF_R3.d	Round_robin_experiment	PYE3_A	L	DIA	nE_tTOF	3	DIANN;FragPipe	L3_nE_tTOF_report.tsv							L3_nE_tTOF_fragpipe_report.tsv
B3_L_DIA_nE_tTOF_R3.d	Round_robin_experiment	PYE3_B	L	DIA	nE_tTOF	3	DIANN;FragPipe	L3_nE_tTOF_report.tsv							L3_nE_tTOF_fragpipe_report.tsv
A1_L_DIA_nE_tTOF_R1.d	Round_robin_experiment	PYE1_A	L	DIA	nE_tTOF	1	DIANN;FragPipe	L1_nE_tTOF_report.tsv							L1_nE_tTOF_fragpipe_report.tsv
B1_L_DIA_nE_tTOF_R1.d	Round_robin_experiment	PYE1_B	L	DIA	nE_tTOF	1	DIANN;FragPipe	L1_nE_tTOF_report.tsv							L1_nE_tTOF_fragpipe_report.tsv
A1_L_DIA_nE_tTOF_R2.d	Round_robin_experiment	PYE1_A	L	DIA	nE_tTOF	2	DIANN;FragPipe	L1_nE_tTOF_report.tsv							L1_nE_tTOF_fragpipe_report.tsv
B1_L_DIA_nE_tTOF_R2.d	Round_robin_experiment	PYE1_B	L	DIA	nE_tTOF	2	DIANN;FragPipe	L1_nE_tTOF_report.tsv							L1_nE_tTOF_fragpipe_report.tsv
A1_L_DIA_nE_tTOF_R3.d	Round_robin_experiment	PYE1_A	L	DIA	nE_tTOF	3	DIANN;FragPipe	L1_nE_tTOF_report.tsv							L1_nE_tTOF_fragpipe_report.tsv
B1_L_DIA_nE_tTOF_R3.d	Round_robin_experiment	PYE1_B	L	DIA	nE_tTOF	3	DIANN;FragPipe	L1_nE_tTOF_report.tsv							L1_nE_tTOF_fragpipe_report.tsv
A1_L_DIA_nAcqu_tTOF_R1.d	Round_robin_experiment	PYE1_A	L	DIA	nAcqu_tTOF	1	DIANN;FragPipe	L1_nAcqu_tTOF_report.tsv							L1_nAcqu_tTOF_fragpipe_report.tsv
B1_L_DIA_nAcqu_tTOF_R1.d	Round_robin_experiment	PYE1_B	L	DIA	nAcqu_tTOF	1	DIANN;FragPipe	L1_nAcqu_tTOF_report.tsv							L1_nAcqu_tTOF_fragpipe_report.tsv
A3_L_DIA_nAcqu_tTOF_R1.d	Round_robin_experiment	PYE3_A	L	DIA	nAcqu_tTOF	1	DIANN;FragPipe	L3_nAcqu_tTOF_report.tsv							L3_nAcqu_tTOF_fragpipe_report.tsv
B3_L_DIA_nAcqu_tTOF_R1.d	Round_robin_experiment	PYE3_B	L	DIA	nAcqu_tTOF	1	DIANN;FragPipe	L3_nAcqu_tTOF_report.tsv							L3_nAcqu_tTOF_fragpipe_report.tsv
A9_L_DIA_nAcqu_tTOF_R1.d	Round_robin_experiment	PYE9_A	L	DIA	nAcqu_tTOF	1	DIANN;FragPipe	L9_nAcqu_tTOF_report.tsv							L9_nAcqu_tTOF_fragpipe_report.tsv
B9_L_DIA_nAcqu_tTOF_R1.d	Round_robin_experiment	PYE9_B	L	DIA	nAcqu_tTOF	1	DIANN;FragPipe	L9_nAcqu_tTOF_report.tsv							L9_nAcqu_tTOF_fragpipe_report.tsv
A1_L_DIA_nAcqu_tTOF_R2.d	Round_robin_experiment	PYE1_A	L	DIA	nAcqu_tTOF	2	DIANN;FragPipe	L1_nAcqu_tTOF_report.tsv							L1_nAcqu_tTOF_fragpipe_report.tsv
B1_L_DIA_nAcqu_tTOF_R2.d	Round_robin_experiment	PYE1_B	L	DIA	nAcqu_tTOF	2	DIANN;FragPipe	L1_nAcqu_tTOF_report.tsv							L1_nAcqu_tTOF_fragpipe_report.tsv
A3_L_DIA_nAcqu_tTOF_R2.d	Round_robin_experiment	PYE3_A	L	DIA	nAcqu_tTOF	2	DIANN;FragPipe	L3_nAcqu_tTOF_report.tsv							L3_nAcqu_tTOF_fragpipe_report.tsv
B3_L_DIA_nAcqu_tTOF_R2.d	Round_robin_experiment	PYE3_B	L	DIA	nAcqu_tTOF	2	DIANN;FragPipe	L3_nAcqu_tTOF_report.tsv							L3_nAcqu_tTOF_fragpipe_report.tsv
A9_L_DIA_nAcqu_tTOF_R2.d	Round_robin_experiment	PYE9_A	L	DIA	nAcqu_tTOF	2	DIANN;FragPipe	L9_nAcqu_tTOF_report.tsv							L9_nAcqu_tTOF_fragpipe_report.tsv
B9_L_DIA_nAcqu_tTOF_R2.d	Round_robin_experiment	PYE9_B	L	DIA	nAcqu_tTOF	2	DIANN;FragPipe	L9_nAcqu_tTOF_report.tsv							L9_nAcqu_tTOF_fragpipe_report.tsv
A1_L_DIA_nAcqu_tTOF_R3.d	Round_robin_experiment	PYE1_A	L	DIA	nAcqu_tTOF	3	DIANN;FragPipe	L1_nAcqu_tTOF_report.tsv							L1_nAcqu_tTOF_fragpipe_report.tsv
B1_L_DIA_nAcqu_tTOF_R3.d	Round_robin_experiment	PYE1_B	L	DIA	nAcqu_tTOF	3	DIANN;FragPipe	L1_nAcqu_tTOF_report.tsv							L1_nAcqu_tTOF_fragpipe_report.tsv
A3_L_DIA_nAcqu_tTOF_R3.d	Round_robin_experiment	PYE3_A	L	DIA	nAcqu_tTOF	3	DIANN;FragPipe	L3_nAcqu_tTOF_report.tsv							L3_nAcqu_tTOF_fragpipe_report.tsv
B3_L_DIA_nAcqu_tTOF_R3.d	Round_robin_experiment	PYE3_B	L	DIA	nAcqu_tTOF	3	DIANN;FragPipe	L3_nAcqu_tTOF_report.tsv							L3_nAcqu_tTOF_fragpipe_report.tsv
A9_L_DIA_nAcqu_tTOF_R3.d	Round_robin_experiment	PYE9_A	L	DIA	nAcqu_tTOF	3	DIANN;FragPipe	L9_nAcqu_tTOF_report.tsv							L9_nAcqu_tTOF_fragpipe_report.tsv
B9_L_DIA_nAcqu_tTOF_R3.d	Round_robin_experiment	PYE9_B	L	DIA	nAcqu_tTOF	3	DIANN;FragPipe	L9_nAcqu_tTOF_report.tsv							L9_nAcqu_tTOF_fragpipe_report.tsv
A1_J_DIA_nLC_tTOF_R1.d	Round_robin_experiment	PYE1_A	J	DIA	nLC_tTOF	1	DIANN;FragPipe	J1_nLC_tTOF_report.tsv							J1_nLC_tTOF_fragpipe_report.tsv
A1_J_DIA_nLC_tTOF_R2.d	Round_robin_experiment	PYE1_A	J	DIA	nLC_tTOF	2	DIANN;FragPipe	J1_nLC_tTOF_report.tsv							J1_nLC_tTOF_fragpipe_report.tsv
A1_J_DIA_nLC_tTOF_R3.d	Round_robin_experiment	PYE1_A	J	DIA	nLC_tTOF	3	DIANN;FragPipe	J1_nLC_tTOF_report.tsv							J1_nLC_tTOF_fragpipe_report.tsv
A3_J_DIA_nLC_tTOF_R1.d	Round_robin_experiment	PYE3_A	J	DIA	nLC_tTOF	1	DIANN;FragPipe	J3_nLC_tTOF_report.tsv							J3_nLC_tTOF_fragpipe_report.tsv
A3_J_DIA_nLC_tTOF_R2.d	Round_robin_experiment	PYE3_A	J	DIA	nLC_tTOF	2	DIANN;FragPipe	J3_nLC_tTOF_report.tsv							J3_nLC_tTOF_fragpipe_report.tsv
A3_J_DIA_nLC_tTOF_R3.d	Round_robin_experiment	PYE3_A	J	DIA	nLC_tTOF	3	DIANN;FragPipe	J3_nLC_tTOF_report.tsv							J3_nLC_tTOF_fragpipe_report.tsv
A9_J_DIA_nLC_tTOF_R1.d	Round_robin_experiment	PYE9_A	J	DIA	nLC_tTOF	1	DIANN;FragPipe	J9_nLC_tTOF_report.tsv							J9_nLC_tTOF_fragpipe_report.tsv
A9_J_DIA_nLC_tTOF_R2.d	Round_robin_experiment	PYE9_A	J	DIA	nLC_tTOF	2	DIANN;FragPipe	J9_nLC_tTOF_report.tsv							J9_nLC_tTOF_fragpipe_report.tsv
A9_J_DIA_nLC_tTOF_R3.d	Round_robin_experiment	PYE9_A	J	DIA	nLC_tTOF	3	DIANN;FragPipe	J9_nLC_tTOF_report.tsv							J9_nLC_tTOF_fragpipe_report.tsv
B1_J_DIA_nLC_tTOF_R1.d	Round_robin_experiment	PYE1_B	J	DIA	nLC_tTOF	1	DIANN;FragPipe	J1_nLC_tTOF_report.tsv							J1_nLC_tTOF_fragpipe_report.tsv
B1_J_DIA_nLC_tTOF_R2.d	Round_robin_experiment	PYE1_B	J	DIA	nLC_tTOF	2	DIANN;FragPipe	J1_nLC_tTOF_report.tsv							J1_nLC_tTOF_fragpipe_report.tsv
B1_J_DIA_nLC_tTOF_R3.d	Round_robin_experiment	PYE1_B	J	DIA	nLC_tTOF	3	DIANN;FragPipe	J1_nLC_tTOF_report.tsv							J1_nLC_tTOF_fragpipe_report.tsv
B3_J_DIA_nLC_tTOF_R1.d	Round_robin_experiment	PYE3_B	J	DIA	nLC_tTOF	1	DIANN;FragPipe	J3_nLC_tTOF_report.tsv							J3_nLC_tTOF_fragpipe_report.tsv
B3_J_DIA_nLC_tTOF_R2.d	Round_robin_experiment	PYE3_B	J	DIA	nLC_tTOF	2	DIANN;FragPipe	J3_nLC_tTOF_report.tsv							J3_nLC_tTOF_fragpipe_report.tsv
B3_J_DIA_nLC_tTOF_R3.d	Round_robin_experiment	PYE3_B	J	DIA	nLC_tTOF	3	DIANN;FragPipe	J3_nLC_tTOF_report.tsv							J3_nLC_tTOF_fragpipe_report.tsv
B9_J_DIA_nLC_tTOF_R1.d	Round_robin_experiment	PYE9_B	J	DIA	nLC_tTOF	1	DIANN;FragPipe	J9_nLC_tTOF_report.tsv							J9_nLC_tTOF_fragpipe_report.tsv
B9_J_DIA_nLC_tTOF_R2.d	Round_robin_experiment	PYE9_B	J	DIA	nLC_tTOF	2	DIANN;FragPipe	J9_nLC_tTOF_report.tsv							J9_nLC_tTOF_fragpipe_report.tsv
B9_J_DIA_nLC_tTOF_R3.d	Round_robin_experiment	PYE9_B	J	DIA	nLC_tTOF	3	DIANN;FragPipe	J9_nLC_tTOF_report.tsv							J9_nLC_tTOF_fragpipe_report.tsv
B1_C_DIA_nE_tTOF_R1.d	Round_robin_experiment	PYE1_B	C	DIA	nE_tTOF	1	DIANN;FragPipe	C1_nE_tTOF_report.tsv							C1_nE_tTOF_fragpipe_report.tsv
B1_C_DIA_nE_tTOF_R2.d	Round_robin_experiment	PYE1_B	C	DIA	nE_tTOF	2	DIANN;FragPipe	C1_nE_tTOF_report.tsv							C1_nE_tTOF_fragpipe_report.tsv
B1_C_DIA_nE_tTOF_R3.d	Round_robin_experiment	PYE1_B	C	DIA	nE_tTOF	3	DIANN;FragPipe	C1_nE_tTOF_report.tsv							C1_nE_tTOF_fragpipe_report.tsv
B1_C_DIA_nE_tTOF_R4.d	Round_robin_experiment	PYE1_B	C	DIA	nE_tTOF	4	DIANN;FragPipe	C1_nE_tTOF_report.tsv							C1_nE_tTOF_fragpipe_report.tsv
B1_C_DIA_nE_tTOF_R5.d	Round_robin_experiment	PYE1_B	C	DIA	nE_tTOF	5	DIANN;FragPipe	C1_nE_tTOF_report.tsv							C1_nE_tTOF_fragpipe_report.tsv
B1_C_DIA_nE_tTOF_R6.d	Round_robin_experiment	PYE1_B	C	DIA	nE_tTOF	6	DIANN;FragPipe	C1_nE_tTOF_report.tsv							C1_nE_tTOF_fragpipe_report.tsv
B3_C_DIA_nE_tTOF_R1.d	Round_robin_experiment	PYE3_B	C	DIA	nE_tTOF	1	DIANN;FragPipe	C3_nE_tTOF_report.tsv							C3_nE_tTOF_fragpipe_report.tsv
B3_C_DIA_nE_tTOF_R2.d	Round_robin_experiment	PYE3_B	C	DIA	nE_tTOF	2	DIANN;FragPipe	C3_nE_tTOF_report.tsv							C3_nE_tTOF_fragpipe_report.tsv
B3_C_DIA_nE_tTOF_R3.d	Round_robin_experiment	PYE3_B	C	DIA	nE_tTOF	3	DIANN;FragPipe	C3_nE_tTOF_report.tsv							C3_nE_tTOF_fragpipe_report.tsv
B3_C_DIA_nE_tTOF_R4.d	Round_robin_experiment	PYE3_B	C	DIA	nE_tTOF	4	DIANN;FragPipe	C3_nE_tTOF_report.tsv							C3_nE_tTOF_fragpipe_report.tsv
B3_C_DIA_nE_tTOF_R5.d	Round_robin_experiment	PYE3_B	C	DIA	nE_tTOF	5	DIANN;FragPipe	C3_nE_tTOF_report.tsv							C3_nE_tTOF_fragpipe_report.tsv
B3_C_DIA_nE_tTOF_R6.d	Round_robin_experiment	PYE3_B	C	DIA	nE_tTOF	6	DIANN;FragPipe	C3_nE_tTOF_report.tsv							C3_nE_tTOF_fragpipe_report.tsv
B9_C_DIA_nE_tTOF_R1.d	Round_robin_experiment	PYE9_B	C	DIA	nE_tTOF	1	DIANN;FragPipe	C9_nE_tTOF_report.tsv							C9_nE_tTOF_fragpipe_report.tsv
B9_C_DIA_nE_tTOF_R2.d	Round_robin_experiment	PYE9_B	C	DIA	nE_tTOF	2	DIANN;FragPipe	C9_nE_tTOF_report.tsv							C9_nE_tTOF_fragpipe_report.tsv
B9_C_DIA_nE_tTOF_R3.d	Round_robin_experiment	PYE9_B	C	DIA	nE_tTOF	3	DIANN;FragPipe	C9_nE_tTOF_report.tsv							C9_nE_tTOF_fragpipe_report.tsv
B9_C_DIA_nE_tTOF_R4.d	Round_robin_experiment	PYE9_B	C	DIA	nE_tTOF	4	DIANN;FragPipe	C9_nE_tTOF_report.tsv							C9_nE_tTOF_fragpipe_report.tsv
B9_C_DIA_nE_tTOF_R5.d	Round_robin_experiment	PYE9_B	C	DIA	nE_tTOF	5	DIANN;FragPipe	C9_nE_tTOF_report.tsv							C9_nE_tTOF_fragpipe_report.tsv
B9_C_DIA_nE_tTOF_R6.d	Round_robin_experiment	PYE9_B	C	DIA	nE_tTOF	6	DIANN;FragPipe	C9_nE_tTOF_report.tsv							C9_nE_tTOF_fragpipe_report.tsv
A1_A_DDA_evo_ex_R1.raw	Round_robin_experiment	PYE1_A	A	DDA	evo_ex	1	MaxQuant;FragPipe		A1_evo_ex_evidence.txt	A1_evo_ex_peptides.txt	A1_evo_ex_proteinGroups.txt	A1_evo_ex_fragpipe_combined_ion.tsv	A1_evo_ex_fragpipe_combined_peptide.tsv	A1_evo_ex_fragpipe_combined_protein.tsv
A1_A_DDA_evo_ex_R2.raw	Round_robin_experiment	PYE1_A	A	DDA	evo_ex	2	MaxQuant;FragPipe		A1_evo_ex_evidence.txt	A1_evo_ex_peptides.txt	A1_evo_ex_proteinGroups.txt	A1_evo_ex_fragpipe_combined_ion.tsv	A1_evo_ex_fragpipe_combined_peptide.tsv	A1_evo_ex_fragpipe_combined_protein.tsv
A1_A_DDA_evo_ex_R3.raw	Round_robin_experiment	PYE1_A	A	DDA	evo_ex	3	MaxQuant;FragPipe		A1_evo_ex_evidence.txt	A1_evo_ex_peptides.txt	A1_evo_ex_proteinGroups.txt	A1_evo_ex_fragpipe_combined_ion.tsv	A1_evo_ex_fragpipe_combined_peptide.tsv	A1_evo_ex_fragpipe_combined_protein.tsv
A1_A_DDA_evo_ex_R4.raw	Round_robin_experiment	PYE1_A	A	DDA	evo_ex	4	MaxQuant;FragPipe		A1_evo_ex_evidence.txt	A1_evo_ex_peptides.txt	A1_evo_ex_proteinGroups.txt	A1_evo_ex_fragpipe_combined_ion.tsv	A1_evo_ex_fragpipe_combined_peptide.tsv	A1_evo_ex_fragpipe_combined_protein.tsv
A1_A_DDA_evo_ex_R5.raw	Round_robin_experiment	PYE1_A	A	DDA	evo_ex	5	MaxQuant;FragPipe		A1_evo_ex_evidence.txt	A1_evo_ex_peptides.txt	A1_evo_ex_proteinGroups.txt	A1_evo_ex_fragpipe_combined_ion.tsv	A1_evo_ex_fragpipe_combined_peptide.tsv	A1_evo_ex_fragpipe_combined_protein.tsv
A1_A_DDA_evo_ex_R6.raw	Round_robin_experiment	PYE1_A	A	DDA	evo_ex	6	MaxQuant;FragPipe		A1_evo_ex_evidence.txt	A1_evo_ex_peptides.txt	A1_evo_ex_proteinGroups.txt	A1_evo_ex_fragpipe_combined_ion.tsv	A1_evo_ex_fragpipe_combined_peptide.tsv	A1_evo_ex_fragpipe_combined_protein.tsv
A1_A_DDA_ulti_ex_R1.raw	Round_robin_experiment	PYE1_A	A	DDA	ulti_ex	1	MaxQuant;FragPipe		A1_ulti_ex_evidence.txt	A1_ulti_ex_peptides.txt	A1_ulti_ex_proteinGroups.txt	A1_ulti_ex_fragpipe_combined_ion.tsv	A1_ulti_ex_fragpipe_combined_peptide.tsv	A1_ulti_ex_fragpipe_combined_protein.tsv
A1_A_DDA_ulti_ex_R2.raw	Round_robin_experiment	PYE1_A	A	DDA	ulti_ex	2	MaxQuant;FragPipe		A1_ulti_ex_evidence.txt	A1_ulti_ex_peptides.txt	A1_ulti_ex_proteinGroups.txt	A1_ulti_ex_fragpipe_combined_ion.tsv	A1_ulti_ex_fragpipe_combined_peptide.tsv	A1_ulti_ex_fragpipe_combined_protein.tsv
A1_A_DDA_ulti_ex_R3.raw	Round_robin_experiment	PYE1_A	A	DDA	ulti_ex	3	MaxQuant;FragPipe		A1_ulti_ex_evidence.txt	A1_ulti_ex_peptides.txt	A1_ulti_ex_proteinGroups.txt	A1_ulti_ex_fragpipe_combined_ion.tsv	A1_ulti_ex_fragpipe_combined_peptide.tsv	A1_ulti_ex_fragpipe_combined_protein.tsv
A1_A_DDA_ulti_ex_R4.raw	Round_robin_experiment	PYE1_A	A	DDA	ulti_ex	4	MaxQuant;FragPipe		A1_ulti_ex_evidence.txt	A1_ulti_ex_peptides.txt	A1_ulti_ex_proteinGroups.txt	A1_ulti_ex_fragpipe_combined_ion.tsv	A1_ulti_ex_fragpipe_combined_peptide.tsv	A1_ulti_ex_fragpipe_combined_protein.tsv
A1_A_DDA_ulti_ex_R5.raw	Round_robin_experiment	PYE1_A	A	DDA	ulti_ex	5	MaxQuant;FragPipe		A1_ulti_ex_evidence.txt	A1_ulti_ex_peptides.txt	A1_ulti_ex_proteinGroups.txt	A1_ulti_ex_fragpipe_combined_ion.tsv	A1_ulti_ex_fragpipe_combined_peptide.tsv	A1_ulti_ex_fragpipe_combined_protein.tsv
A1_A_DDA_ulti_ex_R6.raw	Round_robin_experiment	PYE1_A	A	DDA	ulti_ex	6	MaxQuant;FragPipe		A1_ulti_ex_evidence.txt	A1_ulti_ex_peptides.txt	A1_ulti_ex_proteinGroups.txt	A1_ulti_ex_fragpipe_combined_ion.tsv	A1_ulti_ex_fragpipe_combined_peptide.tsv	A1_ulti_ex_fragpipe_combined_protein.tsv
A1_A_DIA_evo_ex_R1.raw	Round_robin_experiment	PYE1_A	A	DIA	evo_ex	1	DIANN;FragPipe	A1_evo_ex_report.tsv							A1_evo_ex_fragpipe_report.tsv
A1_A_DIA_evo_ex_R2.raw	Round_robin_experiment	PYE1_A	A	DIA	evo_ex	2	DIANN;FragPipe	A1_evo_ex_report.tsv							A1_evo_ex_fragpipe_report.tsv
A1_A_DIA_evo_ex_R3.raw	Round_robin_experiment	PYE1_A	A	DIA	evo_ex	3	DIANN;FragPipe	A1_evo_ex_report.tsv							A1_evo_ex_fragpipe_report.tsv
A1_A_DIA_evo_ex_R4.raw	Round_robin_experiment	PYE1_A	A	DIA	evo_ex	4	DIANN;FragPipe	A1_evo_ex_report.tsv							A1_evo_ex_fragpipe_report.tsv
A1_A_DIA_evo_ex_R5.raw	Round_robin_experiment	PYE1_A	A	DIA	evo_ex	5	DIANN;FragPipe	A1_evo_ex_report.tsv							A1_evo_ex_fragpipe_report.tsv
A1_A_DIA_evo_ex_R6.raw	Round_robin_experiment	PYE1_A	A	DIA	evo_ex	6	DIANN;FragPipe	A1_evo_ex_report.tsv							A1_evo_ex_fragpipe_report.tsv
A1_A_DIA_ulti_ex_R1.raw	Round_robin_experiment	PYE1_A	A	DIA	ulti_ex	1	DIANN;FragPipe	A1_ulti_ex_report.tsv							A1_ulti_ex_fragpipe_report.tsv
A1_A_DIA_ulti_ex_R2.raw	Round_robin_experiment	PYE1_A	A	DIA	ulti_ex	2	DIANN;FragPipe	A1_ulti_ex_report.tsv							A1_ulti_ex_fragpipe_report.tsv
A1_A_DIA_ulti_ex_R3.raw	Round_robin_experiment	PYE1_A	A	DIA	ulti_ex	3	DIANN;FragPipe	A1_ulti_ex_report.tsv							A1_ulti_ex_fragpipe_report.tsv
A1_A_DIA_ulti_ex_R4.raw	Round_robin_experiment	PYE1_A	A	DIA	ulti_ex	4	DIANN;FragPipe	A1_ulti_ex_report.tsv							A1_ulti_ex_fragpipe_report.tsv
A1_A_DIA_ulti_ex_R5.raw	Round_robin_experiment	PYE1_A	A	DIA	ulti_ex	5	DIANN;FragPipe	A1_ulti_ex_report.tsv							A1_ulti_ex_fragpipe_report.tsv
A1_A_DIA_ulti_ex_R6.raw	Round_robin_experiment	PYE1_A	A	DIA	ulti_ex	6	DIANN;FragPipe	A1_ulti_ex_report.tsv							A1_ulti_ex_fragpipe_report.tsv
A1_B_DDA_ulti_HF_R1.raw	Round_robin_experiment	PYE1_A	B	DDA	ulti_HF	1	MaxQuant;FragPipe		B1_ulti_HF_evidence.txt	B1_ulti_HF_peptides.txt	B1_ulti_HF_proteinGroups.txt	B1_ulti_HF_fragpipe_combined_ion.tsv	B1_ulti_HF_fragpipe_combined_peptide.tsv	B1_ulti_HF_fragpipe_combined_protein.tsv
A1_B_DDA_ulti_HF_R2.raw	Round_robin_experiment	PYE1_A	B	DDA	ulti_HF	2	MaxQuant;FragPipe		B1_ulti_HF_evidence.txt	B1_ulti_HF_peptides.txt	B1_ulti_HF_proteinGroups.txt	B1_ulti_HF_fragpipe_combined_ion.tsv	B1_ulti_HF_fragpipe_combined_peptide.tsv	B1_ulti_HF_fragpipe_combined_protein.tsv
A1_B_DDA_ulti_HF_R3.raw	Round_robin_experiment	PYE1_A	B	DDA	ulti_HF	3	MaxQuant;FragPipe		B1_ulti_HF_evidence.txt	B1_ulti_HF_peptides.txt	B1_ulti_HF_proteinGroups.txt	B1_ulti_HF_fragpipe_combined_ion.tsv	B1_ulti_HF_fragpipe_combined_peptide.tsv	B1_ulti_HF_fragpipe_combined_protein.tsv
A1_B_DDA_ulti_HF_R4.raw	Round_robin_experiment	PYE1_A	B	DDA	ulti_HF	4	MaxQuant;FragPipe		B1_ulti_HF_evidence.txt	B1_ulti_HF_peptides.txt	B1_ulti_HF_proteinGroups.txt	B1_ulti_HF_fragpipe_combined_ion.tsv	B1_ulti_HF_fragpipe_combined_peptide.tsv	B1_ulti_HF_fragpipe_combined_protein.tsv
A1_B_DDA_ulti_HF_R5.raw	Round_robin_experiment	PYE1_A	B	DDA	ulti_HF	5	MaxQuant;FragPipe		B1_ulti_HF_evidence.txt	B1_ulti_HF_peptides.txt	B1_ulti_HF_proteinGroups.txt	B1_ulti_HF_fragpipe_combined_ion.tsv	B1_ulti_HF_fragpipe_combined_peptide.tsv	B1_ulti_HF_fragpipe_combined_protein.tsv
A1_B_DDA_ulti_HF_R6.raw	Round_robin_experiment	PYE1_A	B	DDA	ulti_HF	6	MaxQuant;FragPipe		B1_ulti_HF_evidence.txt	B1_ulti_HF_peptides.txt	B1_ulti_HF_proteinGroups.txt	B1_ulti_HF_fragpipe_combined_ion.tsv	B1_ulti_HF_fragpipe_combined_peptide.tsv	B1_ulti_HF_fragpipe_combined_protein.tsv
A1_B_DDA_ulti_HFX_R1.raw	Round_robin_experiment	PYE1_A	B	DDA	ulti_HFX	1	MaxQuant;FragPipe		B1_ulti_HFX_evidence.txt	B1_ulti_HFX_peptides.txt	B1_ulti_HFX_proteinGroups.txt	B1_ulti_HFX_fragpipe_combined_ion.tsv	B1_ulti_HFX_fragpipe_combined_peptide.tsv	B1_ulti_HFX_fragpipe_combined_protein.tsv
A1_B_DDA_ulti_HFX_R2.raw	Round_robin_experiment	PYE1_A	B	DDA	ulti_HFX	2	MaxQuant;FragPipe		B1_ulti_HFX_evidence.txt	B1_ulti_HFX_peptides.txt	B1_ulti_HFX_proteinGroups.txt	B1_ulti_HFX_fragpipe_combined_ion.tsv	B1_ulti_HFX_fragpipe_combined_peptide.tsv	B1_ulti_HFX_fragpipe_combined_protein.tsv
A1_B_DDA_ulti_HFX_R3.raw	Round_robin_experiment	PYE1_A	B	DDA	ulti_HFX	3	MaxQuant;FragPipe		B1_ulti_HFX_evidence.txt	B1_ulti_HFX_peptides.txt	B1_ulti_HFX_proteinGroups.txt	B1_ulti_HFX_fragpipe_combined_ion.tsv	B1_ulti_HFX_fragpipe_combined_peptide.tsv	B1_ulti_HFX_fragpipe_combined_protein.tsv
A1_B_DDA_ulti_HFX_R4.raw	Round_robin_experiment	PYE1_A	B	DDA	ulti_HFX	4	MaxQuant;FragPipe		B1_ulti_HFX_evidence.txt	B1_ulti_HFX_peptides.txt	B1_ulti_HFX_proteinGroups.txt	B1_ulti_HFX_fragpipe_combined_ion.tsv	B1_ulti_HFX_fragpipe_combined_peptide.tsv	B1_ulti_HFX_fragpipe_combined_protein.tsv
A1_B_DDA_ulti_HFX_R5.raw	Round_robin_experiment	PYE1_A	B	DDA	ulti_HFX	5	MaxQuant;FragPipe		B1_ulti_HFX_evidence.txt	B1_ulti_HFX_peptides.txt	B1_ulti_HFX_proteinGroups.txt	B1_ulti_HFX_fragpipe_combined_ion.tsv	B1_ulti_HFX_fragpipe_combined_peptide.tsv	B1_ulti_HFX_fragpipe_combined_protein.tsv
A1_B_DDA_ulti_HFX_R6.raw	Round_robin_experiment	PYE1_A	B	DDA	ulti_HFX	6	MaxQuant;FragPipe		B1_ulti_HFX_evidence.txt	B1_ulti_HFX_peptides.txt	B1_ulti_HFX_proteinGroups.txt	B1_ulti_HFX_fragpipe_combined_ion.tsv	B1_ulti_HFX_fragpipe_combined_peptide.tsv	B1_ulti_HFX_fragpipe_combined_protein.tsv
A1_B_DIA_ulti_HF_R1.raw	Round_robin_experiment	PYE1_A	B	DIA	ulti_HF	1	DIANN;FragPipe	B1_ulti_HF_report.tsv							B1_ulti_HF_fragpipe_report.tsv
A1_B_DIA_ulti_HF_R2.raw	Round_robin_experiment	PYE1_A	B	DIA	ulti_HF	2	DIANN;FragPipe	B1_ulti_HF_report.tsv							B1_ulti_HF_fragpipe_report.tsv
A1_B_DIA_ulti_HF_R3.raw	Round_robin_experiment	PYE1_A	B	DIA	ulti_HF	3	DIANN;FragPipe	B1_ulti_HF_report.tsv							B1_ulti_HF_fragpipe_report.tsv
A1_B_DIA_ulti_HF_R4.raw	Round_robin_experiment	PYE1_A	B	DIA	ulti_HF	4	DIANN;FragPipe	B1_ulti_HF_report.tsv							B1_ulti_HF_fragpipe_report.tsv
A1_B_DIA_ulti_HF_R5.raw	Round_robin_experiment	PYE1_A	B	DIA	ulti_HF	5	DIANN;FragPipe	B1_ulti_HF_report.tsv							B1_ulti_HF_fragpipe_report.tsv
A1_B_DIA_ulti_HF_R6.raw	Round_robin_experiment	PYE1_A	B	DIA	ulti_HF	6	DIANN;FragPipe	B1_ulti_HF_report.tsv							B1_ulti_HF_fragpipe_report.tsv
A1_B_DIA_ulti_HFX_R1.raw	Round_robin_experiment	PYE1_A	B	DIA	ulti_HFX	1	DIANN;FragPipe	B1_ulti_HFX_report.tsv							B1_ulti_HFX_fragpipe_report.tsv
A1_B_DIA_ulti_HFX_R2.raw	Round_robin_experiment	PYE1_A	B	DIA	ulti_HFX	2	DIANN;FragPipe	B1_ulti_HFX_report.tsv							B1_ulti_HFX_fragpipe_report.tsv
A1_B_DIA_ulti_HFX_R3.raw	Round_robin_experiment	PYE1_A	B	DIA	ulti_HFX	3	DIANN;FragPipe	B1_ulti_HFX_report.tsv							B1_ulti_HFX_fragpipe_report.tsv
A1_B_DIA_ulti_HFX_R4.raw	Round_robin_experiment	PYE1_A	B	DIA	ulti_HFX	4	DIANN;FragPipe	B1_ulti_HFX_report.tsv							B1_ulti_HFX_fragpipe_report.tsv
A1_B_DIA_ulti_HFX_R5.raw	Round_robin_experiment	PYE1_A	B	DIA	ulti_HFX	5	DIANN;FragPipe	B1_ulti_HFX_report.tsv							B1_ulti_HFX_fragpipe_report.tsv
A1_B_DIA_ulti_HFX_R6.raw	Round_robin_experiment	PYE1_A	B	DIA	ulti_HFX	6	DIANN;FragPipe	B1_ulti_HFX_report.tsv							B1_ulti_HFX_fragpipe_report.tsv
A1_D_DDA_Vanq_ex_R1.raw	Round_robin_experiment	PYE1_A	D	DDA	Vanq_ex	1	MaxQuant;FragPipe		D1_Vanq_ex_evidence.txt	D1_Vanq_ex_peptides.txt	D1_Vanq_ex_proteinGroups.txt	D1_Vanq_ex_fragpipe_combined_ion.tsv	D1_Vanq_ex_fragpipe_combined_peptide.tsv	D1_Vanq_ex_fragpipe_combined_protein.tsv
A1_D_DDA_Vanq_ex_R2.raw	Round_robin_experiment	PYE1_A	D	DDA	Vanq_ex	2	MaxQuant;FragPipe		D1_Vanq_ex_evidence.txt	D1_Vanq_ex_peptides.txt	D1_Vanq_ex_proteinGroups.txt	D1_Vanq_ex_fragpipe_combined_ion.tsv	D1_Vanq_ex_fragpipe_combined_peptide.tsv	D1_Vanq_ex_fragpipe_combined_protein.tsv
A1_D_DDA_Vanq_ex_R3.raw	Round_robin_experiment	PYE1_A	D	DDA	Vanq_ex	3	MaxQuant;FragPipe		D1_Vanq_ex_evidence.txt	D1_Vanq_ex_peptides.txt	D1_Vanq_ex_proteinGroups.txt	D1_Vanq_ex_fragpipe_combined_ion.tsv	D1_Vanq_ex_fragpipe_combined_peptide.tsv	D1_Vanq_ex_fragpipe_combined_protein.tsv
A1_D_DDA_Vanq_ex_R4.raw	Round_robin_experiment	PYE1_A	D	DDA	Vanq_ex	4	MaxQuant;FragPipe		D1_Vanq_ex_evidence.txt	D1_Vanq_ex_peptides.txt	D1_Vanq_ex_proteinGroups.txt	D1_Vanq_ex_fragpipe_combined_ion.tsv	D1_Vanq_ex_fragpipe_combined_peptide.tsv	D1_Vanq_ex_fragpipe_combined_protein.tsv
A1_D_DDA_Vanq_ex_R5.raw	Round_robin_experiment	PYE1_A	D	DDA	Vanq_ex	5	MaxQuant;FragPipe		D1_Vanq_ex_evidence.txt	D1_Vanq_ex_peptides.txt	D1_Vanq_ex_proteinGroups.txt	D1_Vanq_ex_fragpipe_combined_ion.tsv	D1_Vanq_ex_fragpipe_combined_peptide.tsv	D1_Vanq_ex_fragpipe_combined_protein.tsv
A1_D_DDA_ulti_ecl_R1.raw	Round_robin_experiment	PYE1_A	D	DDA	ulti_ecl	1	MaxQuant;FragPipe		D1_ulti_ecl_evidence.txt	D1_ulti_ecl_peptides.txt	D1_ulti_ecl_proteinGroups.txt	D1_ulti_ecl_fragpipe_combined_ion.tsv	D1_ulti_ecl_fragpipe_combined_peptide.tsv	D1_ulti_ecl_fragpipe_combined_protein.tsv
A1_D_DDA_ulti_ecl_R2.raw	Round_robin_experiment	PYE1_A	D	DDA	ulti_ecl	2	MaxQuant;FragPipe		D1_ulti_ecl_evidence.txt	D1_ulti_ecl_peptides.txt	D1_ulti_ecl_proteinGroups.txt	D1_ulti_ecl_fragpipe_combined_ion.tsv	D1_ulti_ecl_fragpipe_combined_peptide.tsv	D1_ulti_ecl_fragpipe_combined_protein.tsv
A1_D_DDA_ulti_ecl_R3.raw	Round_robin_experiment	PYE1_A	D	DDA	ulti_ecl	3	MaxQuant;FragPipe		D1_ulti_ecl_evidence.txt	D1_ulti_ecl_peptides.txt	D1_ulti_ecl_proteinGroups.txt	D1_ulti_ecl_fragpipe_combined_ion.tsv	D1_ulti_ecl_fragpipe_combined_peptide.tsv	D1_ulti_ecl_fragpipe_combined_protein.tsv
A1_D_DDA_ulti_ecl_R4.raw	Round_robin_experiment	PYE1_A	D	DDA	ulti_ecl	4	MaxQuant;FragPipe		D1_ulti_ecl_evidence.txt	D1_ulti_ecl_peptides.txt	D1_ulti_ecl_proteinGroups.txt	D1_ulti_ecl_fragpipe_combined_ion.tsv	D1_ulti_ecl_fragpipe_combined_peptide.tsv	D1_ulti_ecl_fragpipe_combined_protein.tsv
A1_D_DDA_ulti_ecl_R5.raw	Round_robin_experiment	PYE1_A	D	DDA	ulti_ecl	5	MaxQuant;FragPipe		D1_ulti_ecl_evidence.txt	D1_ulti_ecl_peptides.txt	D1_ulti_ecl_proteinGroups.txt	D1_ulti_ecl_fragpipe_combined_ion.tsv	D1_ulti_ecl_fragpipe_combined_peptide.tsv	D1_ulti_ecl_fragpipe_combined_protein.tsv
A1_D_DDA_ulti_ecl_R6.raw	Round_robin_experiment	PYE1_A	D	DDA	ulti_ecl	6	MaxQuant;FragPipe		D1_ulti_ecl_evidence.txt	D1_ulti_ecl_peptides.txt	D1_ulti_ecl_proteinGroups.txt	D1_ulti_ecl_fragpipe_combined_ion.tsv	D1_ulti_ecl_fragpipe_combined_peptide.tsv	D1_ulti_ecl_fragpipe_combined_protein.tsv
A1_D_DIA_Vanq_ex_R1.raw	Round_robin_experiment	PYE1_A	D	DIA	Vanq_ex	1	DIANN;FragPipe	D1_Vanq_ex_report.tsv							D1_Vanq_ex_fragpipe_report.tsv
A1_D_DIA_Vanq_ex_R2.raw	Round_robin_experiment	PYE1_A	D	DIA	Vanq_ex	2	DIANN;FragPipe	D1_Vanq_ex_report.tsv							D1_Vanq_ex_fragpipe_report.tsv
A1_D_DIA_Vanq_ex_R3.raw	Round_robin_experiment	PYE1_A	D	DIA	Vanq_ex	3	DIANN;FragPipe	D1_Vanq_ex_report.tsv							D1_Vanq_ex_fragpipe_report.tsv
A1_D_DIA_Vanq_ex_R4.raw	Round_robin_experiment	PYE1_A	D	DIA	Vanq_ex	4	DIANN;FragPipe	D1_Vanq_ex_report.tsv							D1_Vanq_ex_fragpipe_report.tsv
A1_D_DIA_Vanq_ex_R5.raw	Round_robin_experiment	PYE1_A	D	DIA	Vanq_ex	5	DIANN;FragPipe	D1_Vanq_ex_report.tsv							D1_Vanq_ex_fragpipe_report.tsv
A1_D_DIA_Vanq_ex_R6.raw	Round_robin_experiment	PYE1_A	D	DIA	Vanq_ex	6	DIANN;FragPipe	D1_Vanq_ex_report.tsv							D1_Vanq_ex_fragpipe_report.tsv
A1_D_DIA_ulti_ecl_R1.raw	Round_robin_experiment	PYE1_A	D	DIA	ulti_ecl	1	DIANN;FragPipe	D1_ulti_ecl_report.tsv							D1_ulti_ecl_fragpipe_report.tsv
A1_D_DIA_ulti_ecl_R2.raw	Round_robin_experiment	PYE1_A	D	DIA	ulti_ecl	2	DIANN;FragPipe	D1_ulti_ecl_report.tsv							D1_ulti_ecl_fragpipe_report.tsv
A1_D_DIA_ulti_ecl_R3.raw	Round_robin_experiment	PYE1_A	D	DIA	ulti_ecl	3	DIANN;FragPipe	D1_ulti_ecl_report.tsv							D1_ulti_ecl_fragpipe_report.tsv
A1_D_DIA_ulti_ecl_R4.raw	Round_robin_experiment	PYE1_A	D	DIA	ulti_ecl	4	DIANN;FragPipe	D1_ulti_ecl_report.tsv							D1_ulti_ecl_fragpipe_report.tsv
A1_D_DIA_ulti_ecl_R5.raw	Round_robin_experiment	PYE1_A	D	DIA	ulti_ecl	5	DIANN;FragPipe	D1_ulti_ecl_report.tsv							D1_ulti_ecl_fragpipe_report.tsv
A1_D_DIA_ulti_ecl_R6.raw	Round_robin_experiment	PYE1_A	D	DIA	ulti_ecl	6	DIANN;FragPipe	D1_ulti_ecl_report.tsv							D1_ulti_ecl_fragpipe_report.tsv
A1_E_DDA_Vanq_ex_R1.raw	Round_robin_experiment	PYE1_A	E	DDA	Vanq_ex	1	MaxQuant;FragPipe		E1_Vanq_ex_evidence.txt	E1_Vanq_ex_peptides.txt	E1_Vanq_ex_proteinGroups.txt	E1_Vanq_ex_fragpipe_combined_ion.tsv	E1_Vanq_ex_fragpipe_combined_peptide.tsv	E1_Vanq_ex_fragpipe_combined_protein.tsv
A1_E_DDA_Vanq_ex_R2.raw	Round_robin_experiment	PYE1_A	E	DDA	Vanq_ex	2	MaxQuant;FragPipe		E1_Vanq_ex_evidence.txt	E1_Vanq_ex_peptides.txt	E1_Vanq_ex_proteinGroups.txt	E1_Vanq_ex_fragpipe_combined_ion.tsv	E1_Vanq_ex_fragpipe_combined_peptide.tsv	E1_Vanq_ex_fragpipe_combined_protein.tsv
A1_E_DDA_Vanq_ex_R3.raw	Round_robin_experiment	PYE1_A	E	DDA	Vanq_ex	3	MaxQuant;FragPipe		E1_Vanq_ex_evidence.txt	E1_Vanq_ex_peptides.txt	E1_Vanq_ex_proteinGroups.txt	E1_Vanq_ex_fragpipe_combined_ion.tsv	E1_Vanq_ex_fragpipe_combined_peptide.tsv	E1_Vanq_ex_fragpipe_combined_protein.tsv
A1_E_DDA_Vanq_ex_R4.raw	Round_robin_experiment	PYE1_A	E	DDA	Vanq_ex	4	MaxQuant;FragPipe		E1_Vanq_ex_evidence.txt	E1_Vanq_ex_peptides.txt	E1_Vanq_ex_proteinGroups.txt	E1_Vanq_ex_fragpipe_combined_ion.tsv	E1_Vanq_ex_fragpipe_combined_peptide.tsv	E1_Vanq_ex_fragpipe_combined_protein.tsv
A1_E_DDA_Vanq_ex_R5.raw	Round_robin_experiment	PYE1_A	E	DDA	Vanq_ex	5	MaxQuant;FragPipe		E1_Vanq_ex_evidence.txt	E1_Vanq_ex_peptides.txt	E1_Vanq_ex_proteinGroups.txt	E1_Vanq_ex_fragpipe_combined_ion.tsv	E1_Vanq_ex_fragpipe_combined_peptide.tsv	E1_Vanq_ex_fragpipe_combined_protein.tsv
A1_E_DDA_ulti_lumos_R1.raw	Round_robin_experiment	PYE1_A	E	DDA	ulti_lumos	1	MaxQuant;FragPipe		E1_ulti_lumos_evidence.txt	E1_ulti_lumos_peptides.txt	E1_ulti_lumos_proteinGroups.txt	E1_ulti_lumos_fragpipe_combined_ion.tsv	E1_ulti_lumos_fragpipe_combined_peptide.tsv	E1_ulti_lumos_fragpipe_combined_protein.tsv
A1_E_DDA_ulti_lumos_R2.raw	Round_robin_experiment	PYE1_A	E	DDA	ulti_lumos	2	MaxQuant;FragPipe		E1_ulti_lumos_evidence.txt	E1_ulti_lumos_peptides.txt	E1_ulti_lumos_proteinGroups.txt	E1_ulti_lumos_fragpipe_combined_ion.tsv	E1_ulti_lumos_fragpipe_combined_peptide.tsv	E1_ulti_lumos_fragpipe_combined_protein.tsv
A1_E_DDA_ulti_lumos_R3.raw	Round_robin_experiment	PYE1_A	E	DDA	ulti_lumos	3	MaxQuant;FragPipe		E1_ulti_lumos_evidence.txt	E1_ulti_lumos_peptides.txt	E1_ulti_lumos_proteinGroups.txt	E1_ulti_lumos_fragpipe_combined_ion.tsv	E1_ulti_lumos_fragpipe_combined_peptide.tsv	E1_ulti_lumos_fragpipe_combined_protein.tsv
A1_E_DDA_ulti_lumos_R4.raw	Round_robin_experiment	PYE1_A	E	DDA	ulti_lumos	4	MaxQuant;FragPipe		E1_ulti_lumos_evidence.txt	E1_ulti_lumos_peptides.txt	E1_ulti_lumos_proteinGroups.txt	E1_ulti_lumos_fragpipe_combined_ion.tsv	E1_ulti_lumos_fragpipe_combined_peptide.tsv	E1_ulti_lumos_fragpipe_combined_protein.tsv
A1_E_DDA_ulti_lumos_R5.raw	Round_robin_experiment	PYE1_A	E	DDA	ulti_lumos	5	MaxQuant;FragPipe		E1_ulti_lumos_evidence.txt	E1_ulti_lumos_peptides.txt	E1_ulti_lumos_proteinGroups.txt	E1_ulti_lumos_fragpipe_combined_ion.tsv	E1_ulti_lumos_fragpipe_combined_peptide.tsv	E1_ulti_lumos_fragpipe_combined_protein.tsv
A1_E_DDA_ulti_lumos_R6.raw	Round_robin_experiment	PYE1_A	E	DDA	ulti_lumos	6	MaxQuant;FragPipe		E1_ulti_lumos_evidence.txt	E1_ulti_lumos_peptides.txt	E1_ulti_lumos_proteinGroups.txt	E1_ulti_lumos_fragpipe_combined_ion.tsv	E1_ulti_lumos_fragpipe_combined_peptide.tsv	E1_ulti_lumos_fragpipe_combined_protein.tsv
A1_E_DIA_Vanq_ex_R1.raw	Round_robin_experiment	PYE1_A	E	DIA	Vanq_ex	1	DIANN;FragPipe	E1_Vanq_ex_report.tsv							E1_Vanq_ex_fragpipe_report.tsv
A1_E_DIA_Vanq_ex_R2.raw	Round_robin_experiment	PYE1_A	E	DIA	Vanq_ex	2	DIANN;FragPipe	E1_Vanq_ex_report.tsv							E1_Vanq_ex_fragpipe_report.tsv
A1_E_DIA_Vanq_ex_R3.raw	Round_robin_experiment	PYE1_A	E	DIA	Vanq_ex	3	DIANN;FragPipe	E1_Vanq_ex_report.tsv							E1_Vanq_ex_fragpipe_report.tsv
A1_E_DIA_Vanq_ex_R4.raw	Round_robin_experiment	PYE1_A	E	DIA	Vanq_ex	4	DIANN;FragPipe	E1_Vanq_ex_report.tsv							E1_Vanq_ex_fragpipe_report.tsv
A1_E_DIA_Vanq_ex_R5.raw	Round_robin_experiment	PYE1_A	E	DIA	Vanq_ex	5	DIANN;FragPipe	E1_Vanq_ex_report.tsv							E1_Vanq_ex_fragpipe_report.tsv
A1_E_DIA_ulti_lumos_R1.raw	Round_robin_experiment	PYE1_A	E	DIA	ulti_lumos	1	DIANN;FragPipe	E1_ulti_lumos_report.tsv							E1_ulti_lumos_fragpipe_report.tsv
A1_E_DIA_ulti_lumos_R2.raw	Round_robin_experiment	PYE1_A	E	DIA	ulti_lumos	2	DIANN;FragPipe	E1_ulti_lumos_report.tsv							E1_ulti_lumos_fragpipe_report.tsv
A1_E_DIA_ulti_lumos_R3.raw	Round_robin_experiment	PYE1_A	E	DIA	ulti_lumos	3	DIANN;FragPipe	E1_ulti_lumos_report.tsv							E1_ulti_lumos_fragpipe_report.tsv
A1_E_DIA_ulti_lumos_R4.raw	Round_robin_experiment	PYE1_A	E	DIA	ulti_lumos	4	DIANN;FragPipe	E1_ulti_lumos_report.tsv							E1_ulti_lumos_fragpipe_report.tsv
A1_E_DIA_ulti_lumos_R5.raw	Round_robin_experiment	PYE1_A	E	DIA	ulti_lumos	5	DIANN;FragPipe	E1_ulti_lumos_report.tsv							E1_ulti_lumos_fragpipe_report.tsv
A1_E_DIA_ulti_lumos_R6.raw	Round_robin_experiment	PYE1_A	E	DIA	ulti_lumos	6	DIANN;FragPipe	E1_ulti_lumos_report.tsv							E1_ulti_lumos_fragpipe_report.tsv
A1_F_DDA_Vanq_ecl_R1.raw	Round_robin_experiment	PYE1_A	F	DDA	Vanq_ecl	1	MaxQuant;FragPipe		F1_Vanq_ecl_evidence.txt	F1_Vanq_ecl_peptides.txt	F1_Vanq_ecl_proteinGroups.txt	F1_Vanq_ecl_fragpipe_combined_ion.tsv	F1_Vanq_ecl_fragpipe_combined_peptide.tsv	F1_Vanq_ecl_fragpipe_combined_protein.tsv
A1_F_DDA_Vanq_ecl_R2.raw	Round_robin_experiment	PYE1_A	F	DDA	Vanq_ecl	2	MaxQuant;FragPipe		F1_Vanq_ecl_evidence.txt	F1_Vanq_ecl_peptides.txt	F1_Vanq_ecl_proteinGroups.txt	F1_Vanq_ecl_fragpipe_combined_ion.tsv	F1_Vanq_ecl_fragpipe_combined_peptide.tsv	F1_Vanq_ecl_fragpipe_combined_protein.tsv
A1_F_DDA_Vanq_ecl_R3.raw	Round_robin_experiment	PYE1_A	F	DDA	Vanq_ecl	3	MaxQuant;FragPipe		F1_Vanq_ecl_evidence.txt	F1_Vanq_ecl_peptides.txt	F1_Vanq_ecl_proteinGroups.txt	F1_Vanq_ecl_fragpipe_combined_ion.tsv	F1_Vanq_ecl_fragpipe_combined_peptide.tsv	F1_Vanq_ecl_fragpipe_combined_protein.tsv
A1_F_DDA_Vanq_ecl_R4.raw	Round_robin_experiment	PYE1_A	F	DDA	Vanq_ecl	4	MaxQuant;FragPipe		F1_Vanq_ecl_evidence.txt	F1_Vanq_ecl_peptides.txt	F1_Vanq_ecl_proteinGroups.txt	F1_Vanq_ecl_fragpipe_combined_ion.tsv	F1_Vanq_ecl_fragpipe_combined_peptide.tsv	F1_Vanq_ecl_fragpipe_combined_protein.tsv
A1_F_DDA_Vanq_ecl_R5.raw	Round_robin_experiment	PYE1_A	F	DDA	Vanq_ecl	5	MaxQuant;FragPipe		F1_Vanq_ecl_evidence.txt	F1_Vanq_ecl_peptides.txt	F1_Vanq_ecl_proteinGroups.txt	F1_Vanq_ecl_fragpipe_combined_ion.tsv	F1_Vanq_ecl_fragpipe_combined_peptide.tsv	F1_Vanq_ecl_fragpipe_combined_protein.tsv
A1_F_DDA_Vanq_ecl_R6.raw	Round_robin_experiment	PYE1_A	F	DDA	Vanq_ecl	6	MaxQuant;FragPipe		F1_Vanq_ecl_evidence.txt	F1_Vanq_ecl_peptides.txt	F1_Vanq_ecl_proteinGroups.txt	F1_Vanq_ecl_fragpipe_combined_ion.tsv	F1_Vanq_ecl_fragpipe_combined_peptide.tsv	F1_Vanq_ecl_fragpipe_combined_protein.tsv
A1_G_DDA_ulti_ex_R1.raw	Round_robin_experiment	PYE1_A	G	DDA	ulti_ex	1	MaxQuant;FragPipe		G1_ulti_ex_evidence.txt	G1_ulti_ex_peptides.txt	G1_ulti_ex_proteinGroups.txt	G1_ulti_ex_fragpipe_combined_ion.tsv	G1_ulti_ex_fragpipe_combined_peptide.tsv	G1_ulti_ex_fragpipe_combined_protein.tsv
A1_G_DDA_ulti_ex_R2.raw	Round_robin_experiment	PYE1_A	G	DDA	ulti_ex	2	MaxQuant;FragPipe		G1_ulti_ex_evidence.txt	G1_ulti_ex_peptides.txt	G1_ulti_ex_proteinGroups.txt	G1_ulti_ex_fragpipe_combined_ion.tsv	G1_ulti_ex_fragpipe_combined_peptide.tsv	G1_ulti_ex_fragpipe_combined_protein.tsv
A1_G_DDA_ulti_ex_R3.raw	Round_robin_experiment	PYE1_A	G	DDA	ulti_ex	3	MaxQuant;FragPipe		G1_ulti_ex_evidence.txt	G1_ulti_ex_peptides.txt	G1_ulti_ex_proteinGroups.txt	G1_ulti_ex_fragpipe_combined_ion.tsv	G1_ulti_ex_fragpipe_combined_peptide.tsv	G1_ulti_ex_fragpipe_combined_protein.tsv
A1_G_DDA_ulti_ex_R4.raw	Round_robin_experiment	PYE1_A	G	DDA	ulti_ex	4	MaxQuant;FragPipe		G1_ulti_ex_evidence.txt	G1_ulti_ex_peptides.txt	G1_ulti_ex_proteinGroups.txt	G1_ulti_ex_fragpipe_combined_ion.tsv	G1_ulti_ex_fragpipe_combined_peptide.tsv	G1_ulti_ex_fragpipe_combined_protein.tsv
A1_G_DDA_ulti_ex_R5.raw	Round_robin_experiment	PYE1_A	G	DDA	ulti_ex	5	MaxQuant;FragPipe		G1_ulti_ex_evidence.txt	G1_ulti_ex_peptides.txt	G1_ulti_ex_proteinGroups.txt	G1_ulti_ex_fragpipe_combined_ion.tsv	G1_ulti_ex_fragpipe_combined_peptide.tsv	G1_ulti_ex_fragpipe_combined_protein.tsv
A1_G_DDA_ulti_ex_R6.raw	Round_robin_experiment	PYE1_A	G	DDA	ulti_ex	6	MaxQuant;FragPipe		G1_ulti_ex_evidence.txt	G1_ulti_ex_peptides.txt	G1_ulti_ex_proteinGroups.txt	G1_ulti_ex_fragpipe_combined_ion.tsv	G1_ulti_ex_fragpipe_combined_peptide.tsv	G1_ulti_ex_fragpipe_combined_protein.tsv
A1_G_DIA_ulti_ex_R1.raw	Round_robin_experiment	PYE1_A	G	DIA	ulti_ex	1	DIANN;FragPipe	G1_ulti_ex_report.tsv							G1_ulti_ex_fragpipe_report.tsv
A1_G_DIA_ulti_ex_R2.raw	Round_robin_experiment	PYE1_A	G	DIA	ulti_ex	2	DIANN;FragPipe	G1_ulti_ex_report.tsv							G1_ulti_ex_fragpipe_report.tsv
A1_G_DIA_ulti_ex_R3.raw	Round_robin_experiment	PYE1_A	G	DIA	ulti_ex	3	DIANN;FragPipe	G1_ulti_ex_report.tsv							G1_ulti_ex_fragpipe_report.tsv
A1_G_DIA_ulti_ex_R4.raw	Round_robin_experiment	PYE1_A	G	DIA	ulti_ex	4	DIANN;FragPipe	G1_ulti_ex_report.tsv							G1_ulti_ex_fragpipe_report.tsv
A1_G_DIA_ulti_ex_R5.raw	Round_robin_experiment	PYE1_A	G	DIA	ulti_ex	5	DIANN;FragPipe	G1_ulti_ex_report.tsv							G1_ulti_ex_fragpipe_report.tsv
A1_G_DIA_ulti_ex_R6.raw	Round_robin_experiment	PYE1_A	G	DIA	ulti_ex	6	DIANN;FragPipe	G1_ulti_ex_report.tsv							G1_ulti_ex_fragpipe_report.tsv
A1_K_DIA_Mclass_zTOF_R1.wiff	Round_robin_experiment	PYE1_A	K	DIA	Mclass_zTOF	1	DIANN;FragPipe	K1_Mclass_zTOF_report.tsv							K1_Mclass_zTOF_fragpipe_report.tsv
A1_K_DIA_Mclass_zTOF_R1.wiff.scan	Round_robin_experiment	PYE1_A	K	DIA	Mclass_zTOF	1	DIANN;FragPipe	K1_Mclass_zTOF_report.tsv							K1_Mclass_zTOF_fragpipe_report.tsv
A1_K_DIA_Mclass_zTOF_R2.wiff	Round_robin_experiment	PYE1_A	K	DIA	Mclass_zTOF	2	DIANN;FragPipe	K1_Mclass_zTOF_report.tsv							K1_Mclass_zTOF_fragpipe_report.tsv
A1_K_DIA_Mclass_zTOF_R2.wiff.scan	Round_robin_experiment	PYE1_A	K	DIA	Mclass_zTOF	2	DIANN;FragPipe	K1_Mclass_zTOF_report.tsv							K1_Mclass_zTOF_fragpipe_report.tsv
A1_K_DIA_Mclass_zTOF_R3.wiff	Round_robin_experiment	PYE1_A	K	DIA	Mclass_zTOF	3	DIANN;FragPipe	K1_Mclass_zTOF_report.tsv							K1_Mclass_zTOF_fragpipe_report.tsv
A1_K_DIA_Mclass_zTOF_R3.wiff.scan	Round_robin_experiment	PYE1_A	K	DIA	Mclass_zTOF	3	DIANN;FragPipe	K1_Mclass_zTOF_report.tsv							K1_Mclass_zTOF_fragpipe_report.tsv
A1_K_DIA_Mclass_zTOF_R4.wiff	Round_robin_experiment	PYE1_A	K	DIA	Mclass_zTOF	4	DIANN;FragPipe	K1_Mclass_zTOF_report.tsv							K1_Mclass_zTOF_fragpipe_report.tsv
A1_K_DIA_Mclass_zTOF_R4.wiff.scan	Round_robin_experiment	PYE1_A	K	DIA	Mclass_zTOF	4	DIANN;FragPipe	K1_Mclass_zTOF_report.tsv							K1_Mclass_zTOF_fragpipe_report.tsv
A1_K_DIA_Mclass_zTOF_R5.wiff	Round_robin_experiment	PYE1_A	K	DIA	Mclass_zTOF	5	DIANN;FragPipe	K1_Mclass_zTOF_report.tsv							K1_Mclass_zTOF_fragpipe_report.tsv
A1_K_DIA_Mclass_zTOF_R5.wiff.scan	Round_robin_experiment	PYE1_A	K	DIA	Mclass_zTOF	5	DIANN;FragPipe	K1_Mclass_zTOF_report.tsv							K1_Mclass_zTOF_fragpipe_report.tsv
A1_K_DIA_Mclass_zTOF_R6.wiff	Round_robin_experiment	PYE1_A	K	DIA	Mclass_zTOF	6	DIANN;FragPipe	K1_Mclass_zTOF_report.tsv							K1_Mclass_zTOF_fragpipe_report.tsv
A1_K_DIA_Mclass_zTOF_R6.wiff.scan	Round_robin_experiment	PYE1_A	K	DIA	Mclass_zTOF	6	DIANN;FragPipe	K1_Mclass_zTOF_report.tsv							K1_Mclass_zTOF_fragpipe_report.tsv
A3_A_DDA_evo_ex_R1.raw	Round_robin_experiment	PYE3_A	A	DDA	evo_ex	1	MaxQuant;FragPipe		A3_evo_ex_evidence.txt	A3_evo_ex_peptides.txt	A3_evo_ex_proteinGroups.txt	A3_evo_ex_fragpipe_combined_ion.tsv	A3_evo_ex_fragpipe_combined_peptide.tsv	A3_evo_ex_fragpipe_combined_protein.tsv
A3_A_DDA_evo_ex_R2.raw	Round_robin_experiment	PYE3_A	A	DDA	evo_ex	2	MaxQuant;FragPipe		A3_evo_ex_evidence.txt	A3_evo_ex_peptides.txt	A3_evo_ex_proteinGroups.txt	A3_evo_ex_fragpipe_combined_ion.tsv	A3_evo_ex_fragpipe_combined_peptide.tsv	A3_evo_ex_fragpipe_combined_protein.tsv
A3_A_DDA_evo_ex_R3.raw	Round_robin_experiment	PYE3_A	A	DDA	evo_ex	3	MaxQuant;FragPipe		A3_evo_ex_evidence.txt	A3_evo_ex_peptides.txt	A3_evo_ex_proteinGroups.txt	A3_evo_ex_fragpipe_combined_ion.tsv	A3_evo_ex_fragpipe_combined_peptide.tsv	A3_evo_ex_fragpipe_combined_protein.tsv
A3_A_DDA_evo_ex_R4.raw	Round_robin_experiment	PYE3_A	A	DDA	evo_ex	4	MaxQuant;FragPipe		A3_evo_ex_evidence.txt	A3_evo_ex_peptides.txt	A3_evo_ex_proteinGroups.txt	A3_evo_ex_fragpipe_combined_ion.tsv	A3_evo_ex_fragpipe_combined_peptide.tsv	A3_evo_ex_fragpipe_combined_protein.tsv
A3_A_DDA_evo_ex_R5.raw	Round_robin_experiment	PYE3_A	A	DDA	evo_ex	5	MaxQuant;FragPipe		A3_evo_ex_evidence.txt	A3_evo_ex_peptides.txt	A3_evo_ex_proteinGroups.txt	A3_evo_ex_fragpipe_combined_ion.tsv	A3_evo_ex_fragpipe_combined_peptide.tsv	A3_evo_ex_fragpipe_combined_protein.tsv
A3_A_DDA_evo_ex_R6.raw	Round_robin_experiment	PYE3_A	A	DDA	evo_ex	6	MaxQuant;FragPipe		A3_evo_ex_evidence.txt	A3_evo_ex_peptides.txt	A3_evo_ex_proteinGroups.txt	A3_evo_ex_fragpipe_combined_ion.tsv	A3_evo_ex_fragpipe_combined_peptide.tsv	A3_evo_ex_fragpipe_combined_protein.tsv
A3_A_DDA_ulti_ex_R1.raw	Round_robin_experiment	PYE3_A	A	DDA	ulti_ex	1	MaxQuant;FragPipe		A3_ulti_ex_evidence.txt	A3_ulti_ex_peptides.txt	A3_ulti_ex_proteinGroups.txt	A3_ulti_ex_fragpipe_combined_ion.tsv	A3_ulti_ex_fragpipe_combined_peptide.tsv	A3_ulti_ex_fragpipe_combined_protein.tsv
A3_A_DDA_ulti_ex_R2.raw	Round_robin_experiment	PYE3_A	A	DDA	ulti_ex	2	MaxQuant;FragPipe		A3_ulti_ex_evidence.txt	A3_ulti_ex_peptides.txt	A3_ulti_ex_proteinGroups.txt	A3_ulti_ex_fragpipe_combined_ion.tsv	A3_ulti_ex_fragpipe_combined_peptide.tsv	A3_ulti_ex_fragpipe_combined_protein.tsv
A3_A_DDA_ulti_ex_R3.raw	Round_robin_experiment	PYE3_A	A	DDA	ulti_ex	3	MaxQuant;FragPipe		A3_ulti_ex_evidence.txt	A3_ulti_ex_peptides.txt	A3_ulti_ex_proteinGroups.txt	A3_ulti_ex_fragpipe_combined_ion.tsv	A3_ulti_ex_fragpipe_combined_peptide.tsv	A3_ulti_ex_fragpipe_combined_protein.tsv
A3_A_DDA_ulti_ex_R4.raw	Round_robin_experiment	PYE3_A	A	DDA	ulti_ex	4	MaxQuant;FragPipe		A3_ulti_ex_evidence.txt	A3_ulti_ex_peptides.txt	A3_ulti_ex_proteinGroups.txt	A3_ulti_ex_fragpipe_combined_ion.tsv	A3_ulti_ex_fragpipe_combined_peptide.tsv	A3_ulti_ex_fragpipe_combined_protein.tsv
A3_A_DDA_ulti_ex_R5.raw	Round_robin_experiment	PYE3_A	A	DDA	ulti_ex	5	MaxQuant;FragPipe		A3_ulti_ex_evidence.txt	A3_ulti_ex_peptides.txt	A3_ulti_ex_proteinGroups.txt	A3_ulti_ex_fragpipe_combined_ion.tsv	A3_ulti_ex_fragpipe_combined_peptide.tsv	A3_ulti_ex_fragpipe_combined_protein.tsv
A3_A_DDA_ulti_ex_R6.raw	Round_robin_experiment	PYE3_A	A	DDA	ulti_ex	6	MaxQuant;FragPipe		A3_ulti_ex_evidence.txt	A3_ulti_ex_peptides.txt	A3_ulti_ex_proteinGroups.txt	A3_ulti_ex_fragpipe_combined_ion.tsv	A3_ulti_ex_fragpipe_combined_peptide.tsv	A3_ulti_ex_fragpipe_combined_protein.tsv
A3_A_DIA_evo_ex_R1.raw	Round_robin_experiment	PYE3_A	A	DIA	evo_ex	1	DIANN;FragPipe	A3_evo_ex_report.tsv							A3_evo_ex_fragpipe_report.tsv
A3_A_DIA_evo_ex_R2.raw	Round_robin_experiment	PYE3_A	A	DIA	evo_ex	2	DIANN;FragPipe	A3_evo_ex_report.tsv							A3_evo_ex_fragpipe_report.tsv
A3_A_DIA_evo_ex_R3.raw	Round_robin_experiment	PYE3_A	A	DIA	evo_ex	3	DIANN;FragPipe	A3_evo_ex_report.tsv							A3_evo_ex_fragpipe_report.tsv
A3_A_DIA_evo_ex_R4.raw	Round_robin_experiment	PYE3_A	A	DIA	evo_ex	4	DIANN;FragPipe	A3_evo_ex_report.tsv							A3_evo_ex_fragpipe_report.tsv
A3_A_DIA_evo_ex_R5.raw	Round_robin_experiment	PYE3_A	A	DIA	evo_ex	5	DIANN;FragPipe	A3_evo_ex_report.tsv							A3_evo_ex_fragpipe_report.tsv
A3_A_DIA_evo_ex_R6.raw	Round_robin_experiment	PYE3_A	A	DIA	evo_ex	6	DIANN;FragPipe	A3_evo_ex_report.tsv							A3_evo_ex_fragpipe_report.tsv
A3_A_DIA_ulti_ex_R1.raw	Round_robin_experiment	PYE3_A	A	DIA	ulti_ex	1	DIANN;FragPipe	A3_ulti_ex_report.tsv							A3_ulti_ex_fragpipe_report.tsv
A3_A_DIA_ulti_ex_R2.raw	Round_robin_experiment	PYE3_A	A	DIA	ulti_ex	2	DIANN;FragPipe	A3_ulti_ex_report.tsv							A3_ulti_ex_fragpipe_report.tsv
A3_A_DIA_ulti_ex_R3.raw	Round_robin_experiment	PYE3_A	A	DIA	ulti_ex	3	DIANN;FragPipe	A3_ulti_ex_report.tsv							A3_ulti_ex_fragpipe_report.tsv
A3_A_DIA_ulti_ex_R4.raw	Round_robin_experiment	PYE3_A	A	DIA	ulti_ex	4	DIANN;FragPipe	A3_ulti_ex_report.tsv							A3_ulti_ex_fragpipe_report.tsv
A3_A_DIA_ulti_ex_R5.raw	Round_robin_experiment	PYE3_A	A	DIA	ulti_ex	5	DIANN;FragPipe	A3_ulti_ex_report.tsv							A3_ulti_ex_fragpipe_report.tsv
A3_A_DIA_ulti_ex_R6.raw	Round_robin_experiment	PYE3_A	A	DIA	ulti_ex	6	DIANN;FragPipe	A3_ulti_ex_report.tsv							A3_ulti_ex_fragpipe_report.tsv
A3_B_DDA_ulti_HF_R1.raw	Round_robin_experiment	PYE3_A	B	DDA	ulti_HF	1	MaxQuant;FragPipe		B3_ulti_HF_evidence.txt	B3_ulti_HF_peptides.txt	B3_ulti_HF_proteinGroups.txt	B3_ulti_HF_fragpipe_combined_ion.tsv	B3_ulti_HF_fragpipe_combined_peptide.tsv	B3_ulti_HF_fragpipe_combined_protein.tsv
A3_B_DDA_ulti_HF_R2.raw	Round_robin_experiment	PYE3_A	B	DDA	ulti_HF	2	MaxQuant;FragPipe		B3_ulti_HF_evidence.txt	B3_ulti_HF_peptides.txt	B3_ulti_HF_proteinGroups.txt	B3_ulti_HF_fragpipe_combined_ion.tsv	B3_ulti_HF_fragpipe_combined_peptide.tsv	B3_ulti_HF_fragpipe_combined_protein.tsv
A3_B_DDA_ulti_HF_R3.raw	Round_robin_experiment	PYE3_A	B	DDA	ulti_HF	3	MaxQuant;FragPipe		B3_ulti_HF_evidence.txt	B3_ulti_HF_peptides.txt	B3_ulti_HF_proteinGroups.txt	B3_ulti_HF_fragpipe_combined_ion.tsv	B3_ulti_HF_fragpipe_combined_peptide.tsv	B3_ulti_HF_fragpipe_combined_protein.tsv
A3_B_DDA_ulti_HF_R4.raw	Round_robin_experiment	PYE3_A	B	DDA	ulti_HF	4	MaxQuant;FragPipe		B3_ulti_HF_evidence.txt	B3_ulti_HF_peptides.txt	B3_ulti_HF_proteinGroups.txt	B3_ulti_HF_fragpipe_combined_ion.tsv	B3_ulti_HF_fragpipe_combined_peptide.tsv	B3_ulti_HF_fragpipe_combined_protein.tsv
A3_B_DDA_ulti_HF_R5.raw	Round_robin_experiment	PYE3_A	B	DDA	ulti_HF	5	MaxQuant;FragPipe		B3_ulti_HF_evidence.txt	B3_ulti_HF_peptides.txt	B3_ulti_HF_proteinGroups.txt	B3_ulti_HF_fragpipe_combined_ion.tsv	B3_ulti_HF_fragpipe_combined_peptide.tsv	B3_ulti_HF_fragpipe_combined_protein.tsv
A3_B_DDA_ulti_HF_R6.raw	Round_robin_experiment	PYE3_A	B	DDA	ulti_HF	6	MaxQuant;FragPipe		B3_ulti_HF_evidence.txt	B3_ulti_HF_peptides.txt	B3_ulti_HF_proteinGroups.txt	B3_ulti_HF_fragpipe_combined_ion.tsv	B3_ulti_HF_fragpipe_combined_peptide.tsv	B3_ulti_HF_fragpipe_combined_protein.tsv
A3_B_DDA_ulti_HFX_R1.raw	Round_robin_experiment	PYE3_A	B	DDA	ulti_HFX	1	MaxQuant;FragPipe		B3_ulti_HFX_evidence.txt	B3_ulti_HFX_peptides.txt	B3_ulti_HFX_proteinGroups.txt	B3_ulti_HFX_fragpipe_combined_ion.tsv	B3_ulti_HFX_fragpipe_combined_peptide.tsv	B3_ulti_HFX_fragpipe_combined_protein.tsv
A3_B_DDA_ulti_HFX_R2.raw	Round_robin_experiment	PYE3_A	B	DDA	ulti_HFX	2	MaxQuant;FragPipe		B3_ulti_HFX_evidence.txt	B3_ulti_HFX_peptides.txt	B3_ulti_HFX_proteinGroups.txt	B3_ulti_HFX_fragpipe_combined_ion.tsv	B3_ulti_HFX_fragpipe_combined_peptide.tsv	B3_ulti_HFX_fragpipe_combined_protein.tsv
A3_B_DDA_ulti_HFX_R3.raw	Round_robin_experiment	PYE3_A	B	DDA	ulti_HFX	3	MaxQuant;FragPipe		B3_ulti_HFX_evidence.txt	B3_ulti_HFX_peptides.txt	B3_ulti_HFX_proteinGroups.txt	B3_ulti_HFX_fragpipe_combined_ion.tsv	B3_ulti_HFX_fragpipe_combined_peptide.tsv	B3_ulti_HFX_fragpipe_combined_protein.tsv
A3_B_DDA_ulti_HFX_R4.raw	Round_robin_experiment	PYE3_A	B	DDA	ulti_HFX	4	MaxQuant;FragPipe		B3_ulti_HFX_evidence.txt	B3_ulti_HFX_peptides.txt	B3_ulti_HFX_proteinGroups.txt	B3_ulti_HFX_fragpipe_combined_ion.tsv	B3_ulti_HFX_fragpipe_combined_peptide.tsv	B3_ulti_HFX_fragpipe_combined_protein.tsv
A3_B_DDA_ulti_HFX_R5.raw	Round_robin_experiment	PYE3_A	B	DDA	ulti_HFX	5	MaxQuant;FragPipe		B3_ulti_HFX_evidence.txt	B3_ulti_HFX_peptides.txt	B3_ulti_HFX_proteinGroups.txt	B3_ulti_HFX_fragpipe_combined_ion.tsv	B3_ulti_HFX_fragpipe_combined_peptide.tsv	B3_ulti_HFX_fragpipe_combined_protein.tsv
A3_B_DDA_ulti_HFX_R6.raw	Round_robin_experiment	PYE3_A	B	DDA	ulti_HFX	6	MaxQuant;FragPipe		B3_ulti_HFX_evidence.txt	B3_ulti_HFX_peptides.txt	B3_ulti_HFX_proteinGroups.txt	B3_ulti_HFX_fragpipe_combined_ion.tsv	B3_ulti_HFX_fragpipe_combined_peptide.tsv	B3_ulti_HFX_fragpipe_combined_protein.tsv
A3_B_DIA_ulti_HF_R1.raw	Round_robin_experiment	PYE3_A	B	DIA	ulti_HF	1	DIANN;FragPipe	B3_ulti_HF_report.tsv							B3_ulti_HF_fragpipe_report.tsv
A3_B_DIA_ulti_HF_R2.raw	Round_robin_experiment	PYE3_A	B	DIA	ulti_HF	2	DIANN;FragPipe	B3_ulti_HF_report.tsv							B3_ulti_HF_fragpipe_report.tsv
A3_B_DIA_ulti_HF_R3.raw	Round_robin_experiment	PYE3_A	B	DIA	ulti_HF	3	DIANN;FragPipe	B3_ulti_HF_report.tsv							B3_ulti_HF_fragpipe_report.tsv
A3_B_DIA_ulti_HF_R4.raw	Round_robin_experiment	PYE3_A	B	DIA	ulti_HF	4	DIANN;FragPipe	B3_ulti_HF_report.tsv							B3_ulti_HF_fragpipe_report.tsv
A3_B_DIA_ulti_HF_R5.raw	Round_robin_experiment	PYE3_A	B	DIA	ulti_HF	5	DIANN;FragPipe	B3_ulti_HF_report.tsv							B3_ulti_HF_fragpipe_report.tsv
A3_B_DIA_ulti_HF_R6.raw	Round_robin_experiment	PYE3_A	B	DIA	ulti_HF	6	DIANN;FragPipe	B3_ulti_HF_report.tsv							B3_ulti_HF_fragpipe_report.tsv
A3_B_DIA_ulti_HFX_R1.raw	Round_robin_experiment	PYE3_A	B	DIA	ulti_HFX	1	DIANN;FragPipe	B3_ulti_HFX_report.tsv							B3_ulti_HFX_fragpipe_report.tsv
A3_B_DIA_ulti_HFX_R2.raw	Round_robin_experiment	PYE3_A	B	DIA	ulti_HFX	2	DIANN;FragPipe	B3_ulti_HFX_report.tsv							B3_ulti_HFX_fragpipe_report.tsv
A3_B_DIA_ulti_HFX_R3.raw	Round_robin_experiment	PYE3_A	B	DIA	ulti_HFX	3	DIANN;FragPipe	B3_ulti_HFX_report.tsv							B3_ulti_HFX_fragpipe_report.tsv
A3_B_DIA_ulti_HFX_R4.raw	Round_robin_experiment	PYE3_A	B	DIA	ulti_HFX	4	DIANN;FragPipe	B3_ulti_HFX_report.tsv							B3_ulti_HFX_fragpipe_report.tsv
A3_B_DIA_ulti_HFX_R5.raw	Round_robin_experiment	PYE3_A	B	DIA	ulti_HFX	5	DIANN;FragPipe	B3_ulti_HFX_report.tsv							B3_ulti_HFX_fragpipe_report.tsv
A3_B_DIA_ulti_HFX_R6.raw	Round_robin_experiment	PYE3_A	B	DIA	ulti_HFX	6	DIANN;FragPipe	B3_ulti_HFX_report.tsv							B3_ulti_HFX_fragpipe_report.tsv
A3_D_DDA_Vanq_ex_R1.raw	Round_robin_experiment	PYE3_A	D	DDA	Vanq_ex	1	MaxQuant;FragPipe		D3_Vanq_ex_evidence.txt	D3_Vanq_ex_peptides.txt	D3_Vanq_ex_proteinGroups.txt	D3_Vanq_ex_fragpipe_combined_ion.tsv	D3_Vanq_ex_fragpipe_combined_peptide.tsv	D3_Vanq_ex_fragpipe_combined_protein.tsv
A3_D_DDA_Vanq_ex_R2.raw	Round_robin_experiment	PYE3_A	D	DDA	Vanq_ex	2	MaxQuant;FragPipe		D3_Vanq_ex_evidence.txt	D3_Vanq_ex_peptides.txt	D3_Vanq_ex_proteinGroups.txt	D3_Vanq_ex_fragpipe_combined_ion.tsv	D3_Vanq_ex_fragpipe_combined_peptide.tsv	D3_Vanq_ex_fragpipe_combined_protein.tsv
A3_D_DDA_Vanq_ex_R3.raw	Round_robin_experiment	PYE3_A	D	DDA	Vanq_ex	3	MaxQuant;FragPipe		D3_Vanq_ex_evidence.txt	D3_Vanq_ex_peptides.txt	D3_Vanq_ex_proteinGroups.txt	D3_Vanq_ex_fragpipe_combined_ion.tsv	D3_Vanq_ex_fragpipe_combined_peptide.tsv	D3_Vanq_ex_fragpipe_combined_protein.tsv
A3_D_DDA_Vanq_ex_R4.raw	Round_robin_experiment	PYE3_A	D	DDA	Vanq_ex	4	MaxQuant;FragPipe		D3_Vanq_ex_evidence.txt	D3_Vanq_ex_peptides.txt	D3_Vanq_ex_proteinGroups.txt	D3_Vanq_ex_fragpipe_combined_ion.tsv	D3_Vanq_ex_fragpipe_combined_peptide.tsv	D3_Vanq_ex_fragpipe_combined_protein.tsv
A3_D_DDA_Vanq_ex_R5.raw	Round_robin_experiment	PYE3_A	D	DDA	Vanq_ex	5	MaxQuant;FragPipe		D3_Vanq_ex_evidence.txt	D3_Vanq_ex_peptides.txt	D3_Vanq_ex_proteinGroups.txt	D3_Vanq_ex_fragpipe_combined_ion.tsv	D3_Vanq_ex_fragpipe_combined_peptide.tsv	D3_Vanq_ex_fragpipe_combined_protein.tsv
A3_D_DDA_ulti_ecl_R1.raw	Round_robin_experiment	PYE3_A	D	DDA	ulti_ecl	1	MaxQuant;FragPipe		D3_ulti_ecl_evidence.txt	D3_ulti_ecl_peptides.txt	D3_ulti_ecl_proteinGroups.txt	D3_ulti_ecl_fragpipe_combined_ion.tsv	D3_ulti_ecl_fragpipe_combined_peptide.tsv	D3_ulti_ecl_fragpipe_combined_protein.tsv
A3_D_DDA_ulti_ecl_R2.raw	Round_robin_experiment	PYE3_A	D	DDA	ulti_ecl	2	MaxQuant;FragPipe		D3_ulti_ecl_evidence.txt	D3_ulti_ecl_peptides.txt	D3_ulti_ecl_proteinGroups.txt	D3_ulti_ecl_fragpipe_combined_ion.tsv	D3_ulti_ecl_fragpipe_combined_peptide.tsv	D3_ulti_ecl_fragpipe_combined_protein.tsv
A3_D_DDA_ulti_ecl_R3.raw	Round_robin_experiment	PYE3_A	D	DDA	ulti_ecl	3	MaxQuant;FragPipe		D3_ulti_ecl_evidence.txt	D3_ulti_ecl_peptides.txt	D3_ulti_ecl_proteinGroups.txt	D3_ulti_ecl_fragpipe_combined_ion.tsv	D3_ulti_ecl_fragpipe_combined_peptide.tsv	D3_ulti_ecl_fragpipe_combined_protein.tsv
A3_D_DDA_ulti_ecl_R4.raw	Round_robin_experiment	PYE3_A	D	DDA	ulti_ecl	4	MaxQuant;FragPipe		D3_ulti_ecl_evidence.txt	D3_ulti_ecl_peptides.txt	D3_ulti_ecl_proteinGroups.txt	D3_ulti_ecl_fragpipe_combined_ion.tsv	D3_ulti_ecl_fragpipe_combined_peptide.tsv	D3_ulti_ecl_fragpipe_combined_protein.tsv
A3_D_DDA_ulti_ecl_R5.raw	Round_robin_experiment	PYE3_A	D	DDA	ulti_ecl	5	MaxQuant;FragPipe		D3_ulti_ecl_evidence.txt	D3_ulti_ecl_peptides.txt	D3_ulti_ecl_proteinGroups.txt	D3_ulti_ecl_fragpipe_combined_ion.tsv	D3_ulti_ecl_fragpipe_combined_peptide.tsv	D3_ulti_ecl_fragpipe_combined_protein.tsv
A3_D_DDA_ulti_ecl_R6.raw	Round_robin_experiment	PYE3_A	D	DDA	ulti_ecl	6	MaxQuant;FragPipe		D3_ulti_ecl_evidence.txt	D3_ulti_ecl_peptides.txt	D3_ulti_ecl_proteinGroups.txt	D3_ulti_ecl_fragpipe_combined_ion.tsv	D3_ulti_ecl_fragpipe_combined_peptide.tsv	D3_ulti_ecl_fragpipe_combined_protein.tsv
A3_D_DIA_Vanq_ex_R1.raw	Round_robin_experiment	PYE3_A	D	DIA	Vanq_ex	1	DIANN;FragPipe	D3_Vanq_ex_report.tsv							D3_Vanq_ex_fragpipe_report.tsv
A3_D_DIA_Vanq_ex_R2.raw	Round_robin_experiment	PYE3_A	D	DIA	Vanq_ex	2	DIANN;FragPipe	D3_Vanq_ex_report.tsv							D3_Vanq_ex_fragpipe_report.tsv
A3_D_DIA_Vanq_ex_R3.raw	Round_robin_experiment	PYE3_A	D	DIA	Vanq_ex	3	DIANN;FragPipe	D3_Vanq_ex_report.tsv							D3_Vanq_ex_fragpipe_report.tsv
A3_D_DIA_Vanq_ex_R4.raw	Round_robin_experiment	PYE3_A	D	DIA	Vanq_ex	4	DIANN;FragPipe	D3_Vanq_ex_report.tsv							D3_Vanq_ex_fragpipe_report.tsv
A3_D_DIA_Vanq_ex_R5.raw	Round_robin_experiment	PYE3_A	D	DIA	Vanq_ex	5	DIANN;FragPipe	D3_Vanq_ex_report.tsv							D3_Vanq_ex_fragpipe_report.tsv
A3_D_DIA_Vanq_ex_R6.raw	Round_robin_experiment	PYE3_A	D	DIA	Vanq_ex	6	DIANN;FragPipe	D3_Vanq_ex_report.tsv							D3_Vanq_ex_fragpipe_report.tsv
A3_D_DIA_ulti_ecl_R1.raw	Round_robin_experiment	PYE3_A	D	DIA	ulti_ecl	1	DIANN;FragPipe	D3_ulti_ecl_report.tsv							D3_ulti_ecl_fragpipe_report.tsv
A3_D_DIA_ulti_ecl_R2.raw	Round_robin_experiment	PYE3_A	D	DIA	ulti_ecl	2	DIANN;FragPipe	D3_ulti_ecl_report.tsv							D3_ulti_ecl_fragpipe_report.tsv
A3_D_DIA_ulti_ecl_R3.raw	Round_robin_experiment	PYE3_A	D	DIA	ulti_ecl	3	DIANN;FragPipe	D3_ulti_ecl_report.tsv							D3_ulti_ecl_fragpipe_report.tsv
A3_D_DIA_ulti_ecl_R4.raw	Round_robin_experiment	PYE3_A	D	DIA	ulti_ecl	4	DIANN;FragPipe	D3_ulti_ecl_report.tsv							D3_ulti_ecl_fragpipe_report.tsv
A3_D_DIA_ulti_ecl_R5.raw	Round_robin_experiment	PYE3_A	D	DIA	ulti_ecl	5	DIANN;FragPipe	D3_ulti_ecl_report.tsv							D3_ulti_ecl_fragpipe_report.tsv
A3_D_DIA_ulti_ecl_R6.raw	Round_robin_experiment	PYE3_A	D	DIA	ulti_ecl	6	DIANN;FragPipe	D3_ulti_ecl_report.tsv							D3_ulti_ecl_fragpipe_report.tsv
A3_E_DDA_Vanq_ex_R1.raw	Round_robin_experiment	PYE3_A	E	DDA	Vanq_ex	1	MaxQuant;FragPipe		E3_Vanq_ex_evidence.txt	E3_Vanq_ex_peptides.txt	E3_Vanq_ex_proteinGroups.txt	E3_Vanq_ex_fragpipe_combined_ion.tsv	E3_Vanq_ex_fragpipe_combined_peptide.tsv	E3_Vanq_ex_fragpipe_combined_protein.tsv
A3_E_DDA_Vanq_ex_R2.raw	Round_robin_experiment	PYE3_A	E	DDA	Vanq_ex	2	MaxQuant;FragPipe		E3_Vanq_ex_evidence.txt	E3_Vanq_ex_peptides.txt	E3_Vanq_ex_proteinGroups.txt	E3_Vanq_ex_fragpipe_combined_ion.tsv	E3_Vanq_ex_fragpipe_combined_peptide.tsv	E3_Vanq_ex_fragpipe_combined_protein.tsv
A3_E_DDA_Vanq_ex_R3.raw	Round_robin_experiment	PYE3_A	E	DDA	Vanq_ex	3	MaxQuant;FragPipe		E3_Vanq_ex_evidence.txt	E3_Vanq_ex_peptides.txt	E3_Vanq_ex_proteinGroups.txt	E3_Vanq_ex_fragpipe_combined_ion.tsv	E3_Vanq_ex_fragpipe_combined_peptide.tsv	E3_Vanq_ex_fragpipe_combined_protein.tsv
A3_E_DDA_Vanq_ex_R4.raw	Round_robin_experiment	PYE3_A	E	DDA	Vanq_ex	4	MaxQuant;FragPipe		E3_Vanq_ex_evidence.txt	E3_Vanq_ex_peptides.txt	E3_Vanq_ex_proteinGroups.txt	E3_Vanq_ex_fragpipe_combined_ion.tsv	E3_Vanq_ex_fragpipe_combined_peptide.tsv	E3_Vanq_ex_fragpipe_combined_protein.tsv
A3_E_DDA_Vanq_ex_R5.raw	Round_robin_experiment	PYE3_A	E	DDA	Vanq_ex	5	MaxQuant;FragPipe		E3_Vanq_ex_evidence.txt	E3_Vanq_ex_peptides.txt	E3_Vanq_ex_proteinGroups.txt	E3_Vanq_ex_fragpipe_combined_ion.tsv	E3_Vanq_ex_fragpipe_combined_peptide.tsv	E3_Vanq_ex_fragpipe_combined_protein.tsv
A3_E_DDA_ulti_lumos_R1.raw	Round_robin_experiment	PYE3_A	E	DDA	ulti_lumos	1	MaxQuant;FragPipe		E3_ulti_lumos_evidence.txt	E3_ulti_lumos_peptides.txt	E3_ulti_lumos_proteinGroups.txt	E3_ulti_lumos_fragpipe_combined_ion.tsv	E3_ulti_lumos_fragpipe_combined_peptide.tsv	E3_ulti_lumos_fragpipe_combined_protein.tsv
A3_E_DDA_ulti_lumos_R2.raw	Round_robin_experiment	PYE3_A	E	DDA	ulti_lumos	2	MaxQuant;FragPipe		E3_ulti_lumos_evidence.txt	E3_ulti_lumos_peptides.txt	E3_ulti_lumos_proteinGroups.txt	E3_ulti_lumos_fragpipe_combined_ion.tsv	E3_ulti_lumos_fragpipe_combined_peptide.tsv	E3_ulti_lumos_fragpipe_combined_protein.tsv
A3_E_DDA_ulti_lumos_R3.raw	Round_robin_experiment	PYE3_A	E	DDA	ulti_lumos	3	MaxQuant;FragPipe		E3_ulti_lumos_evidence.txt	E3_ulti_lumos_peptides.txt	E3_ulti_lumos_proteinGroups.txt	E3_ulti_lumos_fragpipe_combined_ion.tsv	E3_ulti_lumos_fragpipe_combined_peptide.tsv	E3_ulti_lumos_fragpipe_combined_protein.tsv
A3_E_DDA_ulti_lumos_R4.raw	Round_robin_experiment	PYE3_A	E	DDA	ulti_lumos	4	MaxQuant;FragPipe		E3_ulti_lumos_evidence.txt	E3_ulti_lumos_peptides.txt	E3_ulti_lumos_proteinGroups.txt	E3_ulti_lumos_fragpipe_combined_ion.tsv	E3_ulti_lumos_fragpipe_combined_peptide.tsv	E3_ulti_lumos_fragpipe_combined_protein.tsv
A3_E_DDA_ulti_lumos_R5.raw	Round_robin_experiment	PYE3_A	E	DDA	ulti_lumos	5	MaxQuant;FragPipe		E3_ulti_lumos_evidence.txt	E3_ulti_lumos_peptides.txt	E3_ulti_lumos_proteinGroups.txt	E3_ulti_lumos_fragpipe_combined_ion.tsv	E3_ulti_lumos_fragpipe_combined_peptide.tsv	E3_ulti_lumos_fragpipe_combined_protein.tsv
A3_E_DDA_ulti_lumos_R6.raw	Round_robin_experiment	PYE3_A	E	DDA	ulti_lumos	6	MaxQuant;FragPipe		E3_ulti_lumos_evidence.txt	E3_ulti_lumos_peptides.txt	E3_ulti_lumos_proteinGroups.txt	E3_ulti_lumos_fragpipe_combined_ion.tsv	E3_ulti_lumos_fragpipe_combined_peptide.tsv	E3_ulti_lumos_fragpipe_combined_protein.tsv
A3_E_DIA_Vanq_ex_R1.raw	Round_robin_experiment	PYE3_A	E	DIA	Vanq_ex	1	DIANN;FragPipe	E3_Vanq_ex_report.tsv							E3_Vanq_ex_fragpipe_report.tsv
A3_E_DIA_Vanq_ex_R2.raw	Round_robin_experiment	PYE3_A	E	DIA	Vanq_ex	2	DIANN;FragPipe	E3_Vanq_ex_report.tsv							E3_Vanq_ex_fragpipe_report.tsv
A3_E_DIA_Vanq_ex_R3.raw	Round_robin_experiment	PYE3_A	E	DIA	Vanq_ex	3	DIANN;FragPipe	E3_Vanq_ex_report.tsv							E3_Vanq_ex_fragpipe_report.tsv
A3_E_DIA_Vanq_ex_R4.raw	Round_robin_experiment	PYE3_A	E	DIA	Vanq_ex	4	DIANN;FragPipe	E3_Vanq_ex_report.tsv							E3_Vanq_ex_fragpipe_report.tsv
A3_E_DIA_Vanq_ex_R5.raw	Round_robin_experiment	PYE3_A	E	DIA	Vanq_ex	5	DIANN;FragPipe	E3_Vanq_ex_report.tsv							E3_Vanq_ex_fragpipe_report.tsv
A3_E_DIA_ulti_lumos_R1.raw	Round_robin_experiment	PYE3_A	E	DIA	ulti_lumos	1	DIANN;FragPipe	E3_ulti_lumos_report.tsv							E3_ulti_lumos_fragpipe_report.tsv
A3_E_DIA_ulti_lumos_R2.raw	Round_robin_experiment	PYE3_A	E	DIA	ulti_lumos	2	DIANN;FragPipe	E3_ulti_lumos_report.tsv							E3_ulti_lumos_fragpipe_report.tsv
A3_E_DIA_ulti_lumos_R3.raw	Round_robin_experiment	PYE3_A	E	DIA	ulti_lumos	3	DIANN;FragPipe	E3_ulti_lumos_report.tsv							E3_ulti_lumos_fragpipe_report.tsv
A3_E_DIA_ulti_lumos_R4.raw	Round_robin_experiment	PYE3_A	E	DIA	ulti_lumos	4	DIANN;FragPipe	E3_ulti_lumos_report.tsv							E3_ulti_lumos_fragpipe_report.tsv
A3_E_DIA_ulti_lumos_R5.raw	Round_robin_experiment	PYE3_A	E	DIA	ulti_lumos	5	DIANN;FragPipe	E3_ulti_lumos_report.tsv							E3_ulti_lumos_fragpipe_report.tsv
A3_E_DIA_ulti_lumos_R6.raw	Round_robin_experiment	PYE3_A	E	DIA	ulti_lumos	6	DIANN;FragPipe	E3_ulti_lumos_report.tsv							E3_ulti_lumos_fragpipe_report.tsv
A3_F_DDA_Vanq_ecl_R1.raw	Round_robin_experiment	PYE3_A	F	DDA	Vanq_ecl	1	MaxQuant;FragPipe		F3_Vanq_ecl_evidence.txt	F3_Vanq_ecl_peptides.txt	F3_Vanq_ecl_proteinGroups.txt	F3_Vanq_ecl_fragpipe_combined_ion.tsv	F3_Vanq_ecl_fragpipe_combined_peptide.tsv	F3_Vanq_ecl_fragpipe_combined_protein.tsv
A3_F_DDA_Vanq_ecl_R2.raw	Round_robin_experiment	PYE3_A	F	DDA	Vanq_ecl	2	MaxQuant;FragPipe		F3_Vanq_ecl_evidence.txt	F3_Vanq_ecl_peptides.txt	F3_Vanq_ecl_proteinGroups.txt	F3_Vanq_ecl_fragpipe_combined_ion.tsv	F3_Vanq_ecl_fragpipe_combined_peptide.tsv	F3_Vanq_ecl_fragpipe_combined_protein.tsv
A3_F_DDA_Vanq_ecl_R3.raw	Round_robin_experiment	PYE3_A	F	DDA	Vanq_ecl	3	MaxQuant;FragPipe		F3_Vanq_ecl_evidence.txt	F3_Vanq_ecl_peptides.txt	F3_Vanq_ecl_proteinGroups.txt	F3_Vanq_ecl_fragpipe_combined_ion.tsv	F3_Vanq_ecl_fragpipe_combined_peptide.tsv	F3_Vanq_ecl_fragpipe_combined_protein.tsv
A3_F_DDA_Vanq_ecl_R4.raw	Round_robin_experiment	PYE3_A	F	DDA	Vanq_ecl	4	MaxQuant;FragPipe		F3_Vanq_ecl_evidence.txt	F3_Vanq_ecl_peptides.txt	F3_Vanq_ecl_proteinGroups.txt	F3_Vanq_ecl_fragpipe_combined_ion.tsv	F3_Vanq_ecl_fragpipe_combined_peptide.tsv	F3_Vanq_ecl_fragpipe_combined_protein.tsv
A3_F_DDA_Vanq_ecl_R5.raw	Round_robin_experiment	PYE3_A	F	DDA	Vanq_ecl	5	MaxQuant;FragPipe		F3_Vanq_ecl_evidence.txt	F3_Vanq_ecl_peptides.txt	F3_Vanq_ecl_proteinGroups.txt	F3_Vanq_ecl_fragpipe_combined_ion.tsv	F3_Vanq_ecl_fragpipe_combined_peptide.tsv	F3_Vanq_ecl_fragpipe_combined_protein.tsv
A3_F_DDA_Vanq_ecl_R6.raw	Round_robin_experiment	PYE3_A	F	DDA	Vanq_ecl	6	MaxQuant;FragPipe		F3_Vanq_ecl_evidence.txt	F3_Vanq_ecl_peptides.txt	F3_Vanq_ecl_proteinGroups.txt	F3_Vanq_ecl_fragpipe_combined_ion.tsv	F3_Vanq_ecl_fragpipe_combined_peptide.tsv	F3_Vanq_ecl_fragpipe_combined_protein.tsv
A3_G_DDA_ulti_ex_R1.raw	Round_robin_experiment	PYE3_A	G	DDA	ulti_ex	1	MaxQuant;FragPipe		G3_ulti_ex_evidence.txt	G3_ulti_ex_peptides.txt	G3_ulti_ex_proteinGroups.txt	G3_ulti_ex_fragpipe_combined_ion.tsv	G3_ulti_ex_fragpipe_combined_peptide.tsv	G3_ulti_ex_fragpipe_combined_protein.tsv
A3_G_DDA_ulti_ex_R2.raw	Round_robin_experiment	PYE3_A	G	DDA	ulti_ex	2	MaxQuant;FragPipe		G3_ulti_ex_evidence.txt	G3_ulti_ex_peptides.txt	G3_ulti_ex_proteinGroups.txt	G3_ulti_ex_fragpipe_combined_ion.tsv	G3_ulti_ex_fragpipe_combined_peptide.tsv	G3_ulti_ex_fragpipe_combined_protein.tsv
A3_G_DDA_ulti_ex_R3.raw	Round_robin_experiment	PYE3_A	G	DDA	ulti_ex	3	MaxQuant;FragPipe		G3_ulti_ex_evidence.txt	G3_ulti_ex_peptides.txt	G3_ulti_ex_proteinGroups.txt	G3_ulti_ex_fragpipe_combined_ion.tsv	G3_ulti_ex_fragpipe_combined_peptide.tsv	G3_ulti_ex_fragpipe_combined_protein.tsv
A3_G_DDA_ulti_ex_R4.raw	Round_robin_experiment	PYE3_A	G	DDA	ulti_ex	4	MaxQuant;FragPipe		G3_ulti_ex_evidence.txt	G3_ulti_ex_peptides.txt	G3_ulti_ex_proteinGroups.txt	G3_ulti_ex_fragpipe_combined_ion.tsv	G3_ulti_ex_fragpipe_combined_peptide.tsv	G3_ulti_ex_fragpipe_combined_protein.tsv
A3_G_DDA_ulti_ex_R5.raw	Round_robin_experiment	PYE3_A	G	DDA	ulti_ex	5	MaxQuant;FragPipe		G3_ulti_ex_evidence.txt	G3_ulti_ex_peptides.txt	G3_ulti_ex_proteinGroups.txt	G3_ulti_ex_fragpipe_combined_ion.tsv	G3_ulti_ex_fragpipe_combined_peptide.tsv	G3_ulti_ex_fragpipe_combined_protein.tsv
A3_G_DDA_ulti_ex_R6.raw	Round_robin_experiment	PYE3_A	G	DDA	ulti_ex	6	MaxQuant;FragPipe		G3_ulti_ex_evidence.txt	G3_ulti_ex_peptides.txt	G3_ulti_ex_proteinGroups.txt	G3_ulti_ex_fragpipe_combined_ion.tsv	G3_ulti_ex_fragpipe_combined_peptide.tsv	G3_ulti_ex_fragpipe_combined_protein.tsv
A3_G_DIA_ulti_ex_R1.raw	Round_robin_experiment	PYE3_A	G	DIA	ulti_ex	1	DIANN;FragPipe	G3_ulti_ex_report.tsv							G3_ulti_ex_fragpipe_report.tsv
A3_G_DIA_ulti_ex_R2.raw	Round_robin_experiment	PYE3_A	G	DIA	ulti_ex	2	DIANN;FragPipe	G3_ulti_ex_report.tsv							G3_ulti_ex_fragpipe_report.tsv
A3_G_DIA_ulti_ex_R3.raw	Round_robin_experiment	PYE3_A	G	DIA	ulti_ex	3	DIANN;FragPipe	G3_ulti_ex_report.tsv							G3_ulti_ex_fragpipe_report.tsv
A3_G_DIA_ulti_ex_R4.raw	Round_robin_experiment	PYE3_A	G	DIA	ulti_ex	4	DIANN;FragPipe	G3_ulti_ex_report.tsv							G3_ulti_ex_fragpipe_report.tsv
A3_G_DIA_ulti_ex_R5.raw	Round_robin_experiment	PYE3_A	G	DIA	ulti_ex	5	DIANN;FragPipe	G3_ulti_ex_report.tsv							G3_ulti_ex_fragpipe_report.tsv
A3_G_DIA_ulti_ex_R6.raw	Round_robin_experiment	PYE3_A	G	DIA	ulti_ex	6	DIANN;FragPipe	G3_ulti_ex_report.tsv							G3_ulti_ex_fragpipe_report.tsv
A3_K_DIA_Mclass_zTOF_R1.wiff	Round_robin_experiment	PYE3_A	K	DIA	Mclass_zTOF	1	DIANN;FragPipe	K3_Mclass_zTOF_report.tsv							K3_Mclass_zTOF_fragpipe_report.tsv
A3_K_DIA_Mclass_zTOF_R1.wiff.scan	Round_robin_experiment	PYE3_A	K	DIA	Mclass_zTOF	1	DIANN;FragPipe	K3_Mclass_zTOF_report.tsv							K3_Mclass_zTOF_fragpipe_report.tsv
A3_K_DIA_Mclass_zTOF_R2.wiff	Round_robin_experiment	PYE3_A	K	DIA	Mclass_zTOF	2	DIANN;FragPipe	K3_Mclass_zTOF_report.tsv							K3_Mclass_zTOF_fragpipe_report.tsv
A3_K_DIA_Mclass_zTOF_R2.wiff.scan	Round_robin_experiment	PYE3_A	K	DIA	Mclass_zTOF	2	DIANN;FragPipe	K3_Mclass_zTOF_report.tsv							K3_Mclass_zTOF_fragpipe_report.tsv
A3_K_DIA_Mclass_zTOF_R3.wiff	Round_robin_experiment	PYE3_A	K	DIA	Mclass_zTOF	3	DIANN;FragPipe	K3_Mclass_zTOF_report.tsv							K3_Mclass_zTOF_fragpipe_report.tsv
A3_K_DIA_Mclass_zTOF_R3.wiff.scan	Round_robin_experiment	PYE3_A	K	DIA	Mclass_zTOF	3	DIANN;FragPipe	K3_Mclass_zTOF_report.tsv							K3_Mclass_zTOF_fragpipe_report.tsv
A3_K_DIA_Mclass_zTOF_R4.wiff	Round_robin_experiment	PYE3_A	K	DIA	Mclass_zTOF	4	DIANN;FragPipe	K3_Mclass_zTOF_report.tsv							K3_Mclass_zTOF_fragpipe_report.tsv
A3_K_DIA_Mclass_zTOF_R4.wiff.scan	Round_robin_experiment	PYE3_A	K	DIA	Mclass_zTOF	4	DIANN;FragPipe	K3_Mclass_zTOF_report.tsv							K3_Mclass_zTOF_fragpipe_report.tsv
A3_K_DIA_Mclass_zTOF_R5.wiff	Round_robin_experiment	PYE3_A	K	DIA	Mclass_zTOF	5	DIANN;FragPipe	K3_Mclass_zTOF_report.tsv							K3_Mclass_zTOF_fragpipe_report.tsv
A3_K_DIA_Mclass_zTOF_R5.wiff.scan	Round_robin_experiment	PYE3_A	K	DIA	Mclass_zTOF	5	DIANN;FragPipe	K3_Mclass_zTOF_report.tsv							K3_Mclass_zTOF_fragpipe_report.tsv
A3_K_DIA_Mclass_zTOF_R6.wiff	Round_robin_experiment	PYE3_A	K	DIA	Mclass_zTOF	6	DIANN;FragPipe	K3_Mclass_zTOF_report.tsv							K3_Mclass_zTOF_fragpipe_report.tsv
A3_K_DIA_Mclass_zTOF_R6.wiff.scan	Round_robin_experiment	PYE3_A	K	DIA	Mclass_zTOF	6	DIANN;FragPipe	K3_Mclass_zTOF_report.tsv							K3_Mclass_zTOF_fragpipe_report.tsv
A9_A_DDA_evo_ex_R1.raw	Round_robin_experiment	PYE9_A	A	DDA	evo_ex	1	MaxQuant;FragPipe		A9_evo_ex_evidence.txt	A9_evo_ex_peptides.txt	A9_evo_ex_proteinGroups.txt	A9_evo_ex_fragpipe_combined_ion.tsv	A9_evo_ex_fragpipe_combined_peptide.tsv	A9_evo_ex_fragpipe_combined_protein.tsv
A9_A_DDA_evo_ex_R2.raw	Round_robin_experiment	PYE9_A	A	DDA	evo_ex	2	MaxQuant;FragPipe		A9_evo_ex_evidence.txt	A9_evo_ex_peptides.txt	A9_evo_ex_proteinGroups.txt	A9_evo_ex_fragpipe_combined_ion.tsv	A9_evo_ex_fragpipe_combined_peptide.tsv	A9_evo_ex_fragpipe_combined_protein.tsv
A9_A_DDA_evo_ex_R3.raw	Round_robin_experiment	PYE9_A	A	DDA	evo_ex	3	MaxQuant;FragPipe		A9_evo_ex_evidence.txt	A9_evo_ex_peptides.txt	A9_evo_ex_proteinGroups.txt	A9_evo_ex_fragpipe_combined_ion.tsv	A9_evo_ex_fragpipe_combined_peptide.tsv	A9_evo_ex_fragpipe_combined_protein.tsv
A9_A_DDA_evo_ex_R4.raw	Round_robin_experiment	PYE9_A	A	DDA	evo_ex	4	MaxQuant;FragPipe		A9_evo_ex_evidence.txt	A9_evo_ex_peptides.txt	A9_evo_ex_proteinGroups.txt	A9_evo_ex_fragpipe_combined_ion.tsv	A9_evo_ex_fragpipe_combined_peptide.tsv	A9_evo_ex_fragpipe_combined_protein.tsv
A9_A_DDA_evo_ex_R5.raw	Round_robin_experiment	PYE9_A	A	DDA	evo_ex	5	MaxQuant;FragPipe		A9_evo_ex_evidence.txt	A9_evo_ex_peptides.txt	A9_evo_ex_proteinGroups.txt	A9_evo_ex_fragpipe_combined_ion.tsv	A9_evo_ex_fragpipe_combined_peptide.tsv	A9_evo_ex_fragpipe_combined_protein.tsv
A9_A_DDA_evo_ex_R6.raw	Round_robin_experiment	PYE9_A	A	DDA	evo_ex	6	MaxQuant;FragPipe		A9_evo_ex_evidence.txt	A9_evo_ex_peptides.txt	A9_evo_ex_proteinGroups.txt	A9_evo_ex_fragpipe_combined_ion.tsv	A9_evo_ex_fragpipe_combined_peptide.tsv	A9_evo_ex_fragpipe_combined_protein.tsv
A9_A_DDA_ulti_ex_R1.raw	Round_robin_experiment	PYE9_A	A	DDA	ulti_ex	1	MaxQuant;FragPipe		A9_ulti_ex_evidence.txt	A9_ulti_ex_peptides.txt	A9_ulti_ex_proteinGroups.txt	A9_ulti_ex_fragpipe_combined_ion.tsv	A9_ulti_ex_fragpipe_combined_peptide.tsv	A9_ulti_ex_fragpipe_combined_protein.tsv
A9_A_DDA_ulti_ex_R2.raw	Round_robin_experiment	PYE9_A	A	DDA	ulti_ex	2	MaxQuant;FragPipe		A9_ulti_ex_evidence.txt	A9_ulti_ex_peptides.txt	A9_ulti_ex_proteinGroups.txt	A9_ulti_ex_fragpipe_combined_ion.tsv	A9_ulti_ex_fragpipe_combined_peptide.tsv	A9_ulti_ex_fragpipe_combined_protein.tsv
A9_A_DDA_ulti_ex_R3.raw	Round_robin_experiment	PYE9_A	A	DDA	ulti_ex	3	MaxQuant;FragPipe		A9_ulti_ex_evidence.txt	A9_ulti_ex_peptides.txt	A9_ulti_ex_proteinGroups.txt	A9_ulti_ex_fragpipe_combined_ion.tsv	A9_ulti_ex_fragpipe_combined_peptide.tsv	A9_ulti_ex_fragpipe_combined_protein.tsv
A9_A_DDA_ulti_ex_R4.raw	Round_robin_experiment	PYE9_A	A	DDA	ulti_ex	4	MaxQuant;FragPipe		A9_ulti_ex_evidence.txt	A9_ulti_ex_peptides.txt	A9_ulti_ex_proteinGroups.txt	A9_ulti_ex_fragpipe_combined_ion.tsv	A9_ulti_ex_fragpipe_combined_peptide.tsv	A9_ulti_ex_fragpipe_combined_protein.tsv
A9_A_DDA_ulti_ex_R5.raw	Round_robin_experiment	PYE9_A	A	DDA	ulti_ex	5	MaxQuant;FragPipe		A9_ulti_ex_evidence.txt	A9_ulti_ex_peptides.txt	A9_ulti_ex_proteinGroups.txt	A9_ulti_ex_fragpipe_combined_ion.tsv	A9_ulti_ex_fragpipe_combined_peptide.tsv	A9_ulti_ex_fragpipe_combined_protein.tsv
A9_A_DDA_ulti_ex_R6.raw	Round_robin_experiment	PYE9_A	A	DDA	ulti_ex	6	MaxQuant;FragPipe		A9_ulti_ex_evidence.txt	A9_ulti_ex_peptides.txt	A9_ulti_ex_proteinGroups.txt	A9_ulti_ex_fragpipe_combined_ion.tsv	A9_ulti_ex_fragpipe_combined_peptide.tsv	A9_ulti_ex_fragpipe_combined_protein.tsv
A9_A_DIA_evo_ex_R1.raw	Round_robin_experiment	PYE9_A	A	DIA	evo_ex	1	DIANN;FragPipe	A9_evo_ex_report.tsv							A9_evo_ex_fragpipe_report.tsv
A9_A_DIA_evo_ex_R2.raw	Round_robin_experiment	PYE9_A	A	DIA	evo_ex	2	DIANN;FragPipe	A9_evo_ex_report.tsv							A9_evo_ex_fragpipe_report.tsv
A9_A_DIA_evo_ex_R3.raw	Round_robin_experiment	PYE9_A	A	DIA	evo_ex	3	DIANN;FragPipe	A9_evo_ex_report.tsv							A9_evo_ex_fragpipe_report.tsv
A9_A_DIA_evo_ex_R4.raw	Round_robin_experiment	PYE9_A	A	DIA	evo_ex	4	DIANN;FragPipe	A9_evo_ex_report.tsv							A9_evo_ex_fragpipe_report.tsv
A9_A_DIA_evo_ex_R5.raw	Round_robin_experiment	PYE9_A	A	DIA	evo_ex	5	DIANN;FragPipe	A9_evo_ex_report.tsv							A9_evo_ex_fragpipe_report.tsv
A9_A_DIA_evo_ex_R6.raw	Round_robin_experiment	PYE9_A	A	DIA	evo_ex	6	DIANN;FragPipe	A9_evo_ex_report.tsv							A9_evo_ex_fragpipe_report.tsv
A9_A_DIA_ulti_ex_R1.raw	Round_robin_experiment	PYE9_A	A	DIA	ulti_ex	1	DIANN;FragPipe	A9_ulti_ex_report.tsv							A9_ulti_ex_fragpipe_report.tsv
A9_A_DIA_ulti_ex_R2.raw	Round_robin_experiment	PYE9_A	A	DIA	ulti_ex	2	DIANN;FragPipe	A9_ulti_ex_report.tsv							A9_ulti_ex_fragpipe_report.tsv
A9_A_DIA_ulti_ex_R3.raw	Round_robin_experiment	PYE9_A	A	DIA	ulti_ex	3	DIANN;FragPipe	A9_ulti_ex_report.tsv							A9_ulti_ex_fragpipe_report.tsv
A9_A_DIA_ulti_ex_R4.raw	Round_robin_experiment	PYE9_A	A	DIA	ulti_ex	4	DIANN;FragPipe	A9_ulti_ex_report.tsv							A9_ulti_ex_fragpipe_report.tsv
A9_A_DIA_ulti_ex_R5.raw	Round_robin_experiment	PYE9_A	A	DIA	ulti_ex	5	DIANN;FragPipe	A9_ulti_ex_report.tsv							A9_ulti_ex_fragpipe_report.tsv
A9_A_DIA_ulti_ex_R6.raw	Round_robin_experiment	PYE9_A	A	DIA	ulti_ex	6	DIANN;FragPipe	A9_ulti_ex_report.tsv							A9_ulti_ex_fragpipe_report.tsv
A9_B_DDA_ulti_HF_R1.raw	Round_robin_experiment	PYE9_A	B	DDA	ulti_HF	1	MaxQuant;FragPipe		B9_ulti_HF_evidence.txt	B9_ulti_HF_peptides.txt	B9_ulti_HF_proteinGroups.txt	B9_ulti_HF_fragpipe_combined_ion.tsv	B9_ulti_HF_fragpipe_combined_peptide.tsv	B9_ulti_HF_fragpipe_combined_protein.tsv
A9_B_DDA_ulti_HF_R2.raw	Round_robin_experiment	PYE9_A	B	DDA	ulti_HF	2	MaxQuant;FragPipe		B9_ulti_HF_evidence.txt	B9_ulti_HF_peptides.txt	B9_ulti_HF_proteinGroups.txt	B9_ulti_HF_fragpipe_combined_ion.tsv	B9_ulti_HF_fragpipe_combined_peptide.tsv	B9_ulti_HF_fragpipe_combined_protein.tsv
A9_B_DDA_ulti_HF_R3.raw	Round_robin_experiment	PYE9_A	B	DDA	ulti_HF	3	MaxQuant;FragPipe		B9_ulti_HF_evidence.txt	B9_ulti_HF_peptides.txt	B9_ulti_HF_proteinGroups.txt	B9_ulti_HF_fragpipe_combined_ion.tsv	B9_ulti_HF_fragpipe_combined_peptide.tsv	B9_ulti_HF_fragpipe_combined_protein.tsv
A9_B_DDA_ulti_HF_R4.raw	Round_robin_experiment	PYE9_A	B	DDA	ulti_HF	4	MaxQuant;FragPipe		B9_ulti_HF_evidence.txt	B9_ulti_HF_peptides.txt	B9_ulti_HF_proteinGroups.txt	B9_ulti_HF_fragpipe_combined_ion.tsv	B9_ulti_HF_fragpipe_combined_peptide.tsv	B9_ulti_HF_fragpipe_combined_protein.tsv
A9_B_DDA_ulti_HF_R5.raw	Round_robin_experiment	PYE9_A	B	DDA	ulti_HF	5	MaxQuant;FragPipe		B9_ulti_HF_evidence.txt	B9_ulti_HF_peptides.txt	B9_ulti_HF_proteinGroups.txt	B9_ulti_HF_fragpipe_combined_ion.tsv	B9_ulti_HF_fragpipe_combined_peptide.tsv	B9_ulti_HF_fragpipe_combined_protein.tsv
A9_B_DDA_ulti_HF_R6.raw	Round_robin_experiment	PYE9_A	B	DDA	ulti_HF	6	MaxQuant;FragPipe		B9_ulti_HF_evidence.txt	B9_ulti_HF_peptides.txt	B9_ulti_HF_proteinGroups.txt	B9_ulti_HF_fragpipe_combined_ion.tsv	B9_ulti_HF_fragpipe_combined_peptide.tsv	B9_ulti_HF_fragpipe_combined_protein.tsv
A9_B_DDA_ulti_HFX_R1.raw	Round_robin_experiment	PYE9_A	B	DDA	ulti_HFX	1	MaxQuant;FragPipe		B9_ulti_HFX_evidence.txt	B9_ulti_HFX_peptides.txt	B9_ulti_HFX_proteinGroups.txt	B9_ulti_HFX_fragpipe_combined_ion.tsv	B9_ulti_HFX_fragpipe_combined_peptide.tsv	B9_ulti_HFX_fragpipe_combined_protein.tsv
A9_B_DDA_ulti_HFX_R2.raw	Round_robin_experiment	PYE9_A	B	DDA	ulti_HFX	2	MaxQuant;FragPipe		B9_ulti_HFX_evidence.txt	B9_ulti_HFX_peptides.txt	B9_ulti_HFX_proteinGroups.txt	B9_ulti_HFX_fragpipe_combined_ion.tsv	B9_ulti_HFX_fragpipe_combined_peptide.tsv	B9_ulti_HFX_fragpipe_combined_protein.tsv
A9_B_DDA_ulti_HFX_R3.raw	Round_robin_experiment	PYE9_A	B	DDA	ulti_HFX	3	MaxQuant;FragPipe		B9_ulti_HFX_evidence.txt	B9_ulti_HFX_peptides.txt	B9_ulti_HFX_proteinGroups.txt	B9_ulti_HFX_fragpipe_combined_ion.tsv	B9_ulti_HFX_fragpipe_combined_peptide.tsv	B9_ulti_HFX_fragpipe_combined_protein.tsv
A9_B_DDA_ulti_HFX_R4.raw	Round_robin_experiment	PYE9_A	B	DDA	ulti_HFX	4	MaxQuant;FragPipe		B9_ulti_HFX_evidence.txt	B9_ulti_HFX_peptides.txt	B9_ulti_HFX_proteinGroups.txt	B9_ulti_HFX_fragpipe_combined_ion.tsv	B9_ulti_HFX_fragpipe_combined_peptide.tsv	B9_ulti_HFX_fragpipe_combined_protein.tsv
A9_B_DDA_ulti_HFX_R5.raw	Round_robin_experiment	PYE9_A	B	DDA	ulti_HFX	5	MaxQuant;FragPipe		B9_ulti_HFX_evidence.txt	B9_ulti_HFX_peptides.txt	B9_ulti_HFX_proteinGroups.txt	B9_ulti_HFX_fragpipe_combined_ion.tsv	B9_ulti_HFX_fragpipe_combined_peptide.tsv	B9_ulti_HFX_fragpipe_combined_protein.tsv
A9_B_DDA_ulti_HFX_R6.raw	Round_robin_experiment	PYE9_A	B	DDA	ulti_HFX	6	MaxQuant;FragPipe		B9_ulti_HFX_evidence.txt	B9_ulti_HFX_peptides.txt	B9_ulti_HFX_proteinGroups.txt	B9_ulti_HFX_fragpipe_combined_ion.tsv	B9_ulti_HFX_fragpipe_combined_peptide.tsv	B9_ulti_HFX_fragpipe_combined_protein.tsv
A9_B_DIA_ulti_HF_R1.raw	Round_robin_experiment	PYE9_A	B	DIA	ulti_HF	1	DIANN;FragPipe	B9_ulti_HF_report.tsv							B9_ulti_HF_fragpipe_report.tsv
A9_B_DIA_ulti_HF_R2.raw	Round_robin_experiment	PYE9_A	B	DIA	ulti_HF	2	DIANN;FragPipe	B9_ulti_HF_report.tsv							B9_ulti_HF_fragpipe_report.tsv
A9_B_DIA_ulti_HF_R3.raw	Round_robin_experiment	PYE9_A	B	DIA	ulti_HF	3	DIANN;FragPipe	B9_ulti_HF_report.tsv							B9_ulti_HF_fragpipe_report.tsv
A9_B_DIA_ulti_HF_R4.raw	Round_robin_experiment	PYE9_A	B	DIA	ulti_HF	4	DIANN;FragPipe	B9_ulti_HF_report.tsv							B9_ulti_HF_fragpipe_report.tsv
A9_B_DIA_ulti_HF_R5.raw	Round_robin_experiment	PYE9_A	B	DIA	ulti_HF	5	DIANN;FragPipe	B9_ulti_HF_report.tsv							B9_ulti_HF_fragpipe_report.tsv
A9_B_DIA_ulti_HF_R6.raw	Round_robin_experiment	PYE9_A	B	DIA	ulti_HF	6	DIANN;FragPipe	B9_ulti_HF_report.tsv							B9_ulti_HF_fragpipe_report.tsv
A9_B_DIA_ulti_HFX_R1.raw	Round_robin_experiment	PYE9_A	B	DIA	ulti_HFX	1	DIANN;FragPipe	B9_ulti_HFX_report.tsv							B9_ulti_HFX_fragpipe_report.tsv
A9_B_DIA_ulti_HFX_R2.raw	Round_robin_experiment	PYE9_A	B	DIA	ulti_HFX	2	DIANN;FragPipe	B9_ulti_HFX_report.tsv							B9_ulti_HFX_fragpipe_report.tsv
A9_B_DIA_ulti_HFX_R3.raw	Round_robin_experiment	PYE9_A	B	DIA	ulti_HFX	3	DIANN;FragPipe	B9_ulti_HFX_report.tsv							B9_ulti_HFX_fragpipe_report.tsv
A9_B_DIA_ulti_HFX_R4.raw	Round_robin_experiment	PYE9_A	B	DIA	ulti_HFX	4	DIANN;FragPipe	B9_ulti_HFX_report.tsv							B9_ulti_HFX_fragpipe_report.tsv
A9_B_DIA_ulti_HFX_R5.raw	Round_robin_experiment	PYE9_A	B	DIA	ulti_HFX	5	DIANN;FragPipe	B9_ulti_HFX_report.tsv							B9_ulti_HFX_fragpipe_report.tsv
A9_B_DIA_ulti_HFX_R6.raw	Round_robin_experiment	PYE9_A	B	DIA	ulti_HFX	6	DIANN;FragPipe	B9_ulti_HFX_report.tsv							B9_ulti_HFX_fragpipe_report.tsv
A9_D_DDA_Vanq_ex_R1.raw	Round_robin_experiment	PYE9_A	D	DDA	Vanq_ex	1	MaxQuant;FragPipe		D9_Vanq_ex_evidence.txt	D9_Vanq_ex_peptides.txt	D9_Vanq_ex_proteinGroups.txt	D9_Vanq_ex_fragpipe_combined_ion.tsv	D9_Vanq_ex_fragpipe_combined_peptide.tsv	D9_Vanq_ex_fragpipe_combined_protein.tsv
A9_D_DDA_Vanq_ex_R2.raw	Round_robin_experiment	PYE9_A	D	DDA	Vanq_ex	2	MaxQuant;FragPipe		D9_Vanq_ex_evidence.txt	D9_Vanq_ex_peptides.txt	D9_Vanq_ex_proteinGroups.txt	D9_Vanq_ex_fragpipe_combined_ion.tsv	D9_Vanq_ex_fragpipe_combined_peptide.tsv	D9_Vanq_ex_fragpipe_combined_protein.tsv
A9_D_DDA_Vanq_ex_R3.raw	Round_robin_experiment	PYE9_A	D	DDA	Vanq_ex	3	MaxQuant;FragPipe		D9_Vanq_ex_evidence.txt	D9_Vanq_ex_peptides.txt	D9_Vanq_ex_proteinGroups.txt	D9_Vanq_ex_fragpipe_combined_ion.tsv	D9_Vanq_ex_fragpipe_combined_peptide.tsv	D9_Vanq_ex_fragpipe_combined_protein.tsv
A9_D_DDA_Vanq_ex_R4.raw	Round_robin_experiment	PYE9_A	D	DDA	Vanq_ex	4	MaxQuant;FragPipe		D9_Vanq_ex_evidence.txt	D9_Vanq_ex_peptides.txt	D9_Vanq_ex_proteinGroups.txt	D9_Vanq_ex_fragpipe_combined_ion.tsv	D9_Vanq_ex_fragpipe_combined_peptide.tsv	D9_Vanq_ex_fragpipe_combined_protein.tsv
A9_D_DDA_Vanq_ex_R5.raw	Round_robin_experiment	PYE9_A	D	DDA	Vanq_ex	5	MaxQuant;FragPipe		D9_Vanq_ex_evidence.txt	D9_Vanq_ex_peptides.txt	D9_Vanq_ex_proteinGroups.txt	D9_Vanq_ex_fragpipe_combined_ion.tsv	D9_Vanq_ex_fragpipe_combined_peptide.tsv	D9_Vanq_ex_fragpipe_combined_protein.tsv
A9_D_DDA_ulti_ecl_R1.raw	Round_robin_experiment	PYE9_A	D	DDA	ulti_ecl	1	MaxQuant;FragPipe		D9_ulti_ecl_evidence.txt	D9_ulti_ecl_peptides.txt	D9_ulti_ecl_proteinGroups.txt	D9_ulti_ecl_fragpipe_combined_ion.tsv	D9_ulti_ecl_fragpipe_combined_peptide.tsv	D9_ulti_ecl_fragpipe_combined_protein.tsv
A9_D_DDA_ulti_ecl_R2.raw	Round_robin_experiment	PYE9_A	D	DDA	ulti_ecl	2	MaxQuant;FragPipe		D9_ulti_ecl_evidence.txt	D9_ulti_ecl_peptides.txt	D9_ulti_ecl_proteinGroups.txt	D9_ulti_ecl_fragpipe_combined_ion.tsv	D9_ulti_ecl_fragpipe_combined_peptide.tsv	D9_ulti_ecl_fragpipe_combined_protein.tsv
A9_D_DDA_ulti_ecl_R3.raw	Round_robin_experiment	PYE9_A	D	DDA	ulti_ecl	3	MaxQuant;FragPipe		D9_ulti_ecl_evidence.txt	D9_ulti_ecl_peptides.txt	D9_ulti_ecl_proteinGroups.txt	D9_ulti_ecl_fragpipe_combined_ion.tsv	D9_ulti_ecl_fragpipe_combined_peptide.tsv	D9_ulti_ecl_fragpipe_combined_protein.tsv
A9_D_DDA_ulti_ecl_R4.raw	Round_robin_experiment	PYE9_A	D	DDA	ulti_ecl	4	MaxQuant;FragPipe		D9_ulti_ecl_evidence.txt	D9_ulti_ecl_peptides.txt	D9_ulti_ecl_proteinGroups.txt	D9_ulti_ecl_fragpipe_combined_ion.tsv	D9_ulti_ecl_fragpipe_combined_peptide.tsv	D9_ulti_ecl_fragpipe_combined_protein.tsv
A9_D_DDA_ulti_ecl_R5.raw	Round_robin_experiment	PYE9_A	D	DDA	ulti_ecl	5	MaxQuant;FragPipe		D9_ulti_ecl_evidence.txt	D9_ulti_ecl_peptides.txt	D9_ulti_ecl_proteinGroups.txt	D9_ulti_ecl_fragpipe_combined_ion.tsv	D9_ulti_ecl_fragpipe_combined_peptide.tsv	D9_ulti_ecl_fragpipe_combined_protein.tsv
A9_D_DDA_ulti_ecl_R6.raw	Round_robin_experiment	PYE9_A	D	DDA	ulti_ecl	6	MaxQuant;FragPipe		D9_ulti_ecl_evidence.txt	D9_ulti_ecl_peptides.txt	D9_ulti_ecl_proteinGroups.txt	D9_ulti_ecl_fragpipe_combined_ion.tsv	D9_ulti_ecl_fragpipe_combined_peptide.tsv	D9_ulti_ecl_fragpipe_combined_protein.tsv
A9_D_DIA_Vanq_ex_R1.raw	Round_robin_experiment	PYE9_A	D	DIA	Vanq_ex	1	DIANN;FragPipe	D9_Vanq_ex_report.tsv							D9_Vanq_ex_fragpipe_report.tsv
A9_D_DIA_Vanq_ex_R2.raw	Round_robin_experiment	PYE9_A	D	DIA	Vanq_ex	2	DIANN;FragPipe	D9_Vanq_ex_report.tsv							D9_Vanq_ex_fragpipe_report.tsv
A9_D_DIA_Vanq_ex_R3.raw	Round_robin_experiment	PYE9_A	D	DIA	Vanq_ex	3	DIANN;FragPipe	D9_Vanq_ex_report.tsv							D9_Vanq_ex_fragpipe_report.tsv
A9_D_DIA_Vanq_ex_R4.raw	Round_robin_experiment	PYE9_A	D	DIA	Vanq_ex	4	DIANN;FragPipe	D9_Vanq_ex_report.tsv							D9_Vanq_ex_fragpipe_report.tsv
A9_D_DIA_Vanq_ex_R5.raw	Round_robin_experiment	PYE9_A	D	DIA	Vanq_ex	5	DIANN;FragPipe	D9_Vanq_ex_report.tsv							D9_Vanq_ex_fragpipe_report.tsv
A9_D_DIA_Vanq_ex_R6.raw	Round_robin_experiment	PYE9_A	D	DIA	Vanq_ex	6	DIANN;FragPipe	D9_Vanq_ex_report.tsv							D9_Vanq_ex_fragpipe_report.tsv
A9_D_DIA_ulti_ecl_R1.raw	Round_robin_experiment	PYE9_A	D	DIA	ulti_ecl	1	DIANN;FragPipe	D9_ulti_ecl_report.tsv							D9_ulti_ecl_fragpipe_report.tsv
A9_D_DIA_ulti_ecl_R2.raw	Round_robin_experiment	PYE9_A	D	DIA	ulti_ecl	2	DIANN;FragPipe	D9_ulti_ecl_report.tsv							D9_ulti_ecl_fragpipe_report.tsv
A9_D_DIA_ulti_ecl_R3.raw	Round_robin_experiment	PYE9_A	D	DIA	ulti_ecl	3	DIANN;FragPipe	D9_ulti_ecl_report.tsv							D9_ulti_ecl_fragpipe_report.tsv
A9_D_DIA_ulti_ecl_R4.raw	Round_robin_experiment	PYE9_A	D	DIA	ulti_ecl	4	DIANN;FragPipe	D9_ulti_ecl_report.tsv							D9_ulti_ecl_fragpipe_report.tsv
A9_D_DIA_ulti_ecl_R5.raw	Round_robin_experiment	PYE9_A	D	DIA	ulti_ecl	5	DIANN;FragPipe	D9_ulti_ecl_report.tsv							D9_ulti_ecl_fragpipe_report.tsv
A9_D_DIA_ulti_ecl_R6.raw	Round_robin_experiment	PYE9_A	D	DIA	ulti_ecl	6	DIANN;FragPipe	D9_ulti_ecl_report.tsv							D9_ulti_ecl_fragpipe_report.tsv
A9_E_DDA_Vanq_ex_R1.raw	Round_robin_experiment	PYE9_A	E	DDA	Vanq_ex	1	MaxQuant;FragPipe		E9_Vanq_ex_evidence.txt	E9_Vanq_ex_peptides.txt	E9_Vanq_ex_proteinGroups.txt	E9_Vanq_ex_fragpipe_combined_ion.tsv	E9_Vanq_ex_fragpipe_combined_peptide.tsv	E9_Vanq_ex_fragpipe_combined_protein.tsv
A9_E_DDA_Vanq_ex_R2.raw	Round_robin_experiment	PYE9_A	E	DDA	Vanq_ex	2	MaxQuant;FragPipe		E9_Vanq_ex_evidence.txt	E9_Vanq_ex_peptides.txt	E9_Vanq_ex_proteinGroups.txt	E9_Vanq_ex_fragpipe_combined_ion.tsv	E9_Vanq_ex_fragpipe_combined_peptide.tsv	E9_Vanq_ex_fragpipe_combined_protein.tsv
A9_E_DDA_Vanq_ex_R3.raw	Round_robin_experiment	PYE9_A	E	DDA	Vanq_ex	3	MaxQuant;FragPipe		E9_Vanq_ex_evidence.txt	E9_Vanq_ex_peptides.txt	E9_Vanq_ex_proteinGroups.txt	E9_Vanq_ex_fragpipe_combined_ion.tsv	E9_Vanq_ex_fragpipe_combined_peptide.tsv	E9_Vanq_ex_fragpipe_combined_protein.tsv
A9_E_DDA_Vanq_ex_R4.raw	Round_robin_experiment	PYE9_A	E	DDA	Vanq_ex	4	MaxQuant;FragPipe		E9_Vanq_ex_evidence.txt	E9_Vanq_ex_peptides.txt	E9_Vanq_ex_proteinGroups.txt	E9_Vanq_ex_fragpipe_combined_ion.tsv	E9_Vanq_ex_fragpipe_combined_peptide.tsv	E9_Vanq_ex_fragpipe_combined_protein.tsv
A9_E_DDA_Vanq_ex_R5.raw	Round_robin_experiment	PYE9_A	E	DDA	Vanq_ex	5	MaxQuant;FragPipe		E9_Vanq_ex_evidence.txt	E9_Vanq_ex_peptides.txt	E9_Vanq_ex_proteinGroups.txt	E9_Vanq_ex_fragpipe_combined_ion.tsv	E9_Vanq_ex_fragpipe_combined_peptide.tsv	E9_Vanq_ex_fragpipe_combined_protein.tsv
A9_E_DDA_ulti_lumos_R1.raw	Round_robin_experiment	PYE9_A	E	DDA	ulti_lumos	1	MaxQuant;FragPipe		E9_ulti_lumos_evidence.txt	E9_ulti_lumos_peptides.txt	E9_ulti_lumos_proteinGroups.txt	E9_ulti_lumos_fragpipe_combined_ion.tsv	E9_ulti_lumos_fragpipe_combined_peptide.tsv	E9_ulti_lumos_fragpipe_combined_protein.tsv
A9_E_DDA_ulti_lumos_R2.raw	Round_robin_experiment	PYE9_A	E	DDA	ulti_lumos	2	MaxQuant;FragPipe		E9_ulti_lumos_evidence.txt	E9_ulti_lumos_peptides.txt	E9_ulti_lumos_proteinGroups.txt	E9_ulti_lumos_fragpipe_combined_ion.tsv	E9_ulti_lumos_fragpipe_combined_peptide.tsv	E9_ulti_lumos_fragpipe_combined_protein.tsv
A9_E_DDA_ulti_lumos_R3.raw	Round_robin_experiment	PYE9_A	E	DDA	ulti_lumos	3	MaxQuant;FragPipe		E9_ulti_lumos_evidence.txt	E9_ulti_lumos_peptides.txt	E9_ulti_lumos_proteinGroups.txt	E9_ulti_lumos_fragpipe_combined_ion.tsv	E9_ulti_lumos_fragpipe_combined_peptide.tsv	E9_ulti_lumos_fragpipe_combined_protein.tsv
A9_E_DDA_ulti_lumos_R4.raw	Round_robin_experiment	PYE9_A	E	DDA	ulti_lumos	4	MaxQuant;FragPipe		E9_ulti_lumos_evidence.txt	E9_ulti_lumos_peptides.txt	E9_ulti_lumos_proteinGroups.txt	E9_ulti_lumos_fragpipe_combined_ion.tsv	E9_ulti_lumos_fragpipe_combined_peptide.tsv	E9_ulti_lumos_fragpipe_combined_protein.tsv
A9_E_DDA_ulti_lumos_R5.raw	Round_robin_experiment	PYE9_A	E	DDA	ulti_lumos	5	MaxQuant;FragPipe		E9_ulti_lumos_evidence.txt	E9_ulti_lumos_peptides.txt	E9_ulti_lumos_proteinGroups.txt	E9_ulti_lumos_fragpipe_combined_ion.tsv	E9_ulti_lumos_fragpipe_combined_peptide.tsv	E9_ulti_lumos_fragpipe_combined_protein.tsv
A9_E_DDA_ulti_lumos_R6.raw	Round_robin_experiment	PYE9_A	E	DDA	ulti_lumos	6	MaxQuant;FragPipe		E9_ulti_lumos_evidence.txt	E9_ulti_lumos_peptides.txt	E9_ulti_lumos_proteinGroups.txt	E9_ulti_lumos_fragpipe_combined_ion.tsv	E9_ulti_lumos_fragpipe_combined_peptide.tsv	E9_ulti_lumos_fragpipe_combined_protein.tsv
A9_E_DIA_Vanq_ex_R1.raw	Round_robin_experiment	PYE9_A	E	DIA	Vanq_ex	1	DIANN;FragPipe	E9_Vanq_ex_report.tsv							E9_Vanq_ex_fragpipe_report.tsv
A9_E_DIA_Vanq_ex_R2.raw	Round_robin_experiment	PYE9_A	E	DIA	Vanq_ex	2	DIANN;FragPipe	E9_Vanq_ex_report.tsv							E9_Vanq_ex_fragpipe_report.tsv
A9_E_DIA_Vanq_ex_R3.raw	Round_robin_experiment	PYE9_A	E	DIA	Vanq_ex	3	DIANN;FragPipe	E9_Vanq_ex_report.tsv							E9_Vanq_ex_fragpipe_report.tsv
A9_E_DIA_Vanq_ex_R4.raw	Round_robin_experiment	PYE9_A	E	DIA	Vanq_ex	4	DIANN;FragPipe	E9_Vanq_ex_report.tsv							E9_Vanq_ex_fragpipe_report.tsv
A9_E_DIA_Vanq_ex_R5.raw	Round_robin_experiment	PYE9_A	E	DIA	Vanq_ex	5	DIANN;FragPipe	E9_Vanq_ex_report.tsv							E9_Vanq_ex_fragpipe_report.tsv
A9_E_DIA_ulti_lumos_R1.raw	Round_robin_experiment	PYE9_A	E	DIA	ulti_lumos	1	DIANN;FragPipe	E9_ulti_lumos_report.tsv							E9_ulti_lumos_fragpipe_report.tsv
A9_E_DIA_ulti_lumos_R2.raw	Round_robin_experiment	PYE9_A	E	DIA	ulti_lumos	2	DIANN;FragPipe	E9_ulti_lumos_report.tsv							E9_ulti_lumos_fragpipe_report.tsv
A9_E_DIA_ulti_lumos_R3.raw	Round_robin_experiment	PYE9_A	E	DIA	ulti_lumos	3	DIANN;FragPipe	E9_ulti_lumos_report.tsv							E9_ulti_lumos_fragpipe_report.tsv
A9_E_DIA_ulti_lumos_R4.raw	Round_robin_experiment	PYE9_A	E	DIA	ulti_lumos	4	DIANN;FragPipe	E9_ulti_lumos_report.tsv							E9_ulti_lumos_fragpipe_report.tsv
A9_E_DIA_ulti_lumos_R5.raw	Round_robin_experiment	PYE9_A	E	DIA	ulti_lumos	5	DIANN;FragPipe	E9_ulti_lumos_report.tsv							E9_ulti_lumos_fragpipe_report.tsv
A9_E_DIA_ulti_lumos_R6.raw	Round_robin_experiment	PYE9_A	E	DIA	ulti_lumos	6	DIANN;FragPipe	E9_ulti_lumos_report.tsv							E9_ulti_lumos_fragpipe_report.tsv
A9_F_DDA_Vanq_ecl_R1.raw	Round_robin_experiment	PYE9_A	F	DDA	Vanq_ecl	1	MaxQuant;FragPipe		F9_Vanq_ecl_evidence.txt	F9_Vanq_ecl_peptides.txt	F9_Vanq_ecl_proteinGroups.txt	F9_Vanq_ecl_fragpipe_combined_ion.tsv	F9_Vanq_ecl_fragpipe_combined_peptide.tsv	F9_Vanq_ecl_fragpipe_combined_protein.tsv
A9_F_DDA_Vanq_ecl_R2.raw	Round_robin_experiment	PYE9_A	F	DDA	Vanq_ecl	2	MaxQuant;FragPipe		F9_Vanq_ecl_evidence.txt	F9_Vanq_ecl_peptides.txt	F9_Vanq_ecl_proteinGroups.txt	F9_Vanq_ecl_fragpipe_combined_ion.tsv	F9_Vanq_ecl_fragpipe_combined_peptide.tsv	F9_Vanq_ecl_fragpipe_combined_protein.tsv
A9_F_DDA_Vanq_ecl_R3.raw	Round_robin_experiment	PYE9_A	F	DDA	Vanq_ecl	3	MaxQuant;FragPipe		F9_Vanq_ecl_evidence.txt	F9_Vanq_ecl_peptides.txt	F9_Vanq_ecl_proteinGroups.txt	F9_Vanq_ecl_fragpipe_combined_ion.tsv	F9_Vanq_ecl_fragpipe_combined_peptide.tsv	F9_Vanq_ecl_fragpipe_combined_protein.tsv
A9_F_DDA_Vanq_ecl_R4.raw	Round_robin_experiment	PYE9_A	F	DDA	Vanq_ecl	4	MaxQuant;FragPipe		F9_Vanq_ecl_evidence.txt	F9_Vanq_ecl_peptides.txt	F9_Vanq_ecl_proteinGroups.txt	F9_Vanq_ecl_fragpipe_combined_ion.tsv	F9_Vanq_ecl_fragpipe_combined_peptide.tsv	F9_Vanq_ecl_fragpipe_combined_protein.tsv
A9_F_DDA_Vanq_ecl_R5.raw	Round_robin_experiment	PYE9_A	F	DDA	Vanq_ecl	5	MaxQuant;FragPipe		F9_Vanq_ecl_evidence.txt	F9_Vanq_ecl_peptides.txt	F9_Vanq_ecl_proteinGroups.txt	F9_Vanq_ecl_fragpipe_combined_ion.tsv	F9_Vanq_ecl_fragpipe_combined_peptide.tsv	F9_Vanq_ecl_fragpipe_combined_protein.tsv
A9_F_DDA_Vanq_ecl_R6.raw	Round_robin_experiment	PYE9_A	F	DDA	Vanq_ecl	6	MaxQuant;FragPipe		F9_Vanq_ecl_evidence.txt	F9_Vanq_ecl_peptides.txt	F9_Vanq_ecl_proteinGroups.txt	F9_Vanq_ecl_fragpipe_combined_ion.tsv	F9_Vanq_ecl_fragpipe_combined_peptide.tsv	F9_Vanq_ecl_fragpipe_combined_protein.tsv
A9_G_DDA_ulti_ex_R1.raw	Round_robin_experiment	PYE9_A	G	DDA	ulti_ex	1	MaxQuant;FragPipe		G9_ulti_ex_evidence.txt	G9_ulti_ex_peptides.txt	G9_ulti_ex_proteinGroups.txt	G9_ulti_ex_fragpipe_combined_ion.tsv	G9_ulti_ex_fragpipe_combined_peptide.tsv	G9_ulti_ex_fragpipe_combined_protein.tsv
A9_G_DDA_ulti_ex_R2.raw	Round_robin_experiment	PYE9_A	G	DDA	ulti_ex	2	MaxQuant;FragPipe		G9_ulti_ex_evidence.txt	G9_ulti_ex_peptides.txt	G9_ulti_ex_proteinGroups.txt	G9_ulti_ex_fragpipe_combined_ion.tsv	G9_ulti_ex_fragpipe_combined_peptide.tsv	G9_ulti_ex_fragpipe_combined_protein.tsv
A9_G_DDA_ulti_ex_R3.raw	Round_robin_experiment	PYE9_A	G	DDA	ulti_ex	3	MaxQuant;FragPipe		G9_ulti_ex_evidence.txt	G9_ulti_ex_peptides.txt	G9_ulti_ex_proteinGroups.txt	G9_ulti_ex_fragpipe_combined_ion.tsv	G9_ulti_ex_fragpipe_combined_peptide.tsv	G9_ulti_ex_fragpipe_combined_protein.tsv
A9_G_DDA_ulti_ex_R4.raw	Round_robin_experiment	PYE9_A	G	DDA	ulti_ex	4	MaxQuant;FragPipe		G9_ulti_ex_evidence.txt	G9_ulti_ex_peptides.txt	G9_ulti_ex_proteinGroups.txt	G9_ulti_ex_fragpipe_combined_ion.tsv	G9_ulti_ex_fragpipe_combined_peptide.tsv	G9_ulti_ex_fragpipe_combined_protein.tsv
A9_G_DDA_ulti_ex_R5.raw	Round_robin_experiment	PYE9_A	G	DDA	ulti_ex	5	MaxQuant;FragPipe		G9_ulti_ex_evidence.txt	G9_ulti_ex_peptides.txt	G9_ulti_ex_proteinGroups.txt	G9_ulti_ex_fragpipe_combined_ion.tsv	G9_ulti_ex_fragpipe_combined_peptide.tsv	G9_ulti_ex_fragpipe_combined_protein.tsv
A9_G_DDA_ulti_ex_R6.raw	Round_robin_experiment	PYE9_A	G	DDA	ulti_ex	6	MaxQuant;FragPipe		G9_ulti_ex_evidence.txt	G9_ulti_ex_peptides.txt	G9_ulti_ex_proteinGroups.txt	G9_ulti_ex_fragpipe_combined_ion.tsv	G9_ulti_ex_fragpipe_combined_peptide.tsv	G9_ulti_ex_fragpipe_combined_protein.tsv
A9_G_DIA_ulti_ex_R1.raw	Round_robin_experiment	PYE9_A	G	DIA	ulti_ex	1	DIANN;FragPipe	G9_ulti_ex_report.tsv							G9_ulti_ex_fragpipe_report.tsv
A9_G_DIA_ulti_ex_R2.raw	Round_robin_experiment	PYE9_A	G	DIA	ulti_ex	2	DIANN;FragPipe	G9_ulti_ex_report.tsv							G9_ulti_ex_fragpipe_report.tsv
A9_G_DIA_ulti_ex_R3.raw	Round_robin_experiment	PYE9_A	G	DIA	ulti_ex	3	DIANN;FragPipe	G9_ulti_ex_report.tsv							G9_ulti_ex_fragpipe_report.tsv
A9_G_DIA_ulti_ex_R4.raw	Round_robin_experiment	PYE9_A	G	DIA	ulti_ex	4	DIANN;FragPipe	G9_ulti_ex_report.tsv							G9_ulti_ex_fragpipe_report.tsv
A9_G_DIA_ulti_ex_R5.raw	Round_robin_experiment	PYE9_A	G	DIA	ulti_ex	5	DIANN;FragPipe	G9_ulti_ex_report.tsv							G9_ulti_ex_fragpipe_report.tsv
A9_G_DIA_ulti_ex_R6.raw	Round_robin_experiment	PYE9_A	G	DIA	ulti_ex	6	DIANN;FragPipe	G9_ulti_ex_report.tsv							G9_ulti_ex_fragpipe_report.tsv
A9_K_DIA_Mclass_zTOF_R1.wiff	Round_robin_experiment	PYE9_A	K	DIA	Mclass_zTOF	1	DIANN;FragPipe	K9_Mclass_zTOF_report.tsv							K9_Mclass_zTOF_fragpipe_report.tsv
A9_K_DIA_Mclass_zTOF_R1.wiff.scan	Round_robin_experiment	PYE9_A	K	DIA	Mclass_zTOF	1	DIANN;FragPipe	K9_Mclass_zTOF_report.tsv							K9_Mclass_zTOF_fragpipe_report.tsv
A9_K_DIA_Mclass_zTOF_R2.wiff	Round_robin_experiment	PYE9_A	K	DIA	Mclass_zTOF	2	DIANN;FragPipe	K9_Mclass_zTOF_report.tsv							K9_Mclass_zTOF_fragpipe_report.tsv
A9_K_DIA_Mclass_zTOF_R2.wiff.scan	Round_robin_experiment	PYE9_A	K	DIA	Mclass_zTOF	2	DIANN;FragPipe	K9_Mclass_zTOF_report.tsv							K9_Mclass_zTOF_fragpipe_report.tsv
A9_K_DIA_Mclass_zTOF_R3.wiff	Round_robin_experiment	PYE9_A	K	DIA	Mclass_zTOF	3	DIANN;FragPipe	K9_Mclass_zTOF_report.tsv							K9_Mclass_zTOF_fragpipe_report.tsv
A9_K_DIA_Mclass_zTOF_R3.wiff.scan	Round_robin_experiment	PYE9_A	K	DIA	Mclass_zTOF	3	DIANN;FragPipe	K9_Mclass_zTOF_report.tsv							K9_Mclass_zTOF_fragpipe_report.tsv
A9_K_DIA_Mclass_zTOF_R4.wiff	Round_robin_experiment	PYE9_A	K	DIA	Mclass_zTOF	4	DIANN;FragPipe	K9_Mclass_zTOF_report.tsv							K9_Mclass_zTOF_fragpipe_report.tsv
A9_K_DIA_Mclass_zTOF_R4.wiff.scan	Round_robin_experiment	PYE9_A	K	DIA	Mclass_zTOF	4	DIANN;FragPipe	K9_Mclass_zTOF_report.tsv							K9_Mclass_zTOF_fragpipe_report.tsv
A9_K_DIA_Mclass_zTOF_R5.wiff	Round_robin_experiment	PYE9_A	K	DIA	Mclass_zTOF	5	DIANN;FragPipe	K9_Mclass_zTOF_report.tsv							K9_Mclass_zTOF_fragpipe_report.tsv
A9_K_DIA_Mclass_zTOF_R5.wiff.scan	Round_robin_experiment	PYE9_A	K	DIA	Mclass_zTOF	5	DIANN;FragPipe	K9_Mclass_zTOF_report.tsv							K9_Mclass_zTOF_fragpipe_report.tsv
A9_K_DIA_Mclass_zTOF_R6.wiff	Round_robin_experiment	PYE9_A	K	DIA	Mclass_zTOF	6	DIANN;FragPipe	K9_Mclass_zTOF_report.tsv							K9_Mclass_zTOF_fragpipe_report.tsv
A9_K_DIA_Mclass_zTOF_R6.wiff.scan	Round_robin_experiment	PYE9_A	K	DIA	Mclass_zTOF	6	DIANN;FragPipe	K9_Mclass_zTOF_report.tsv							K9_Mclass_zTOF_fragpipe_report.tsv
B1_A_DDA_evo_ex_R1.raw	Round_robin_experiment	PYE1_B	A	DDA	evo_ex	1	MaxQuant;FragPipe		A1_evo_ex_evidence.txt	A1_evo_ex_peptides.txt	A1_evo_ex_proteinGroups.txt	A1_evo_ex_fragpipe_combined_ion.tsv	A1_evo_ex_fragpipe_combined_peptide.tsv	A1_evo_ex_fragpipe_combined_protein.tsv
B1_A_DDA_evo_ex_R2.raw	Round_robin_experiment	PYE1_B	A	DDA	evo_ex	2	MaxQuant;FragPipe		A1_evo_ex_evidence.txt	A1_evo_ex_peptides.txt	A1_evo_ex_proteinGroups.txt	A1_evo_ex_fragpipe_combined_ion.tsv	A1_evo_ex_fragpipe_combined_peptide.tsv	A1_evo_ex_fragpipe_combined_protein.tsv
B1_A_DDA_evo_ex_R3.raw	Round_robin_experiment	PYE1_B	A	DDA	evo_ex	3	MaxQuant;FragPipe		A1_evo_ex_evidence.txt	A1_evo_ex_peptides.txt	A1_evo_ex_proteinGroups.txt	A1_evo_ex_fragpipe_combined_ion.tsv	A1_evo_ex_fragpipe_combined_peptide.tsv	A1_evo_ex_fragpipe_combined_protein.tsv
B1_A_DDA_evo_ex_R4.raw	Round_robin_experiment	PYE1_B	A	DDA	evo_ex	4	MaxQuant;FragPipe		A1_evo_ex_evidence.txt	A1_evo_ex_peptides.txt	A1_evo_ex_proteinGroups.txt	A1_evo_ex_fragpipe_combined_ion.tsv	A1_evo_ex_fragpipe_combined_peptide.tsv	A1_evo_ex_fragpipe_combined_protein.tsv
B1_A_DDA_evo_ex_R5.raw	Round_robin_experiment	PYE1_B	A	DDA	evo_ex	5	MaxQuant;FragPipe		A1_evo_ex_evidence.txt	A1_evo_ex_peptides.txt	A1_evo_ex_proteinGroups.txt	A1_evo_ex_fragpipe_combined_ion.tsv	A1_evo_ex_fragpipe_combined_peptide.tsv	A1_evo_ex_fragpipe_combined_protein.tsv
B1_A_DDA_evo_ex_R6.raw	Round_robin_experiment	PYE1_B	A	DDA	evo_ex	6	MaxQuant;FragPipe		A1_evo_ex_evidence.txt	A1_evo_ex_peptides.txt	A1_evo_ex_proteinGroups.txt	A1_evo_ex_fragpipe_combined_ion.tsv	A1_evo_ex_fragpipe_combined_peptide.tsv	A1_evo_ex_fragpipe_combined_protein.tsv
B1_A_DDA_ulti_ex_R1.raw	Round_robin_experiment	PYE1_B	A	DDA	ulti_ex	1	MaxQuant;FragPipe		A1_ulti_ex_evidence.txt	A1_ulti_ex_peptides.txt	A1_ulti_ex_proteinGroups.txt	A1_ulti_ex_fragpipe_combined_ion.tsv	A1_ulti_ex_fragpipe_combined_peptide.tsv	A1_ulti_ex_fragpipe_combined_protein.tsv
B1_A_DDA_ulti_ex_R2.raw	Round_robin_experiment	PYE1_B	A	DDA	ulti_ex	2	MaxQuant;FragPipe		A1_ulti_ex_evidence.txt	A1_ulti_ex_peptides.txt	A1_ulti_ex_proteinGroups.txt	A1_ulti_ex_fragpipe_combined_ion.tsv	A1_ulti_ex_fragpipe_combined_peptide.tsv	A1_ulti_ex_fragpipe_combined_protein.tsv
B1_A_DDA_ulti_ex_R3.raw	Round_robin_experiment	PYE1_B	A	DDA	ulti_ex	3	MaxQuant;FragPipe		A1_ulti_ex_evidence.txt	A1_ulti_ex_peptides.txt	A1_ulti_ex_proteinGroups.txt	A1_ulti_ex_fragpipe_combined_ion.tsv	A1_ulti_ex_fragpipe_combined_peptide.tsv	A1_ulti_ex_fragpipe_combined_protein.tsv
B1_A_DDA_ulti_ex_R4.raw	Round_robin_experiment	PYE1_B	A	DDA	ulti_ex	4	MaxQuant;FragPipe		A1_ulti_ex_evidence.txt	A1_ulti_ex_peptides.txt	A1_ulti_ex_proteinGroups.txt	A1_ulti_ex_fragpipe_combined_ion.tsv	A1_ulti_ex_fragpipe_combined_peptide.tsv	A1_ulti_ex_fragpipe_combined_protein.tsv
B1_A_DDA_ulti_ex_R5.raw	Round_robin_experiment	PYE1_B	A	DDA	ulti_ex	5	MaxQuant;FragPipe		A1_ulti_ex_evidence.txt	A1_ulti_ex_peptides.txt	A1_ulti_ex_proteinGroups.txt	A1_ulti_ex_fragpipe_combined_ion.tsv	A1_ulti_ex_fragpipe_combined_peptide.tsv	A1_ulti_ex_fragpipe_combined_protein.tsv
B1_A_DDA_ulti_ex_R6.raw	Round_robin_experiment	PYE1_B	A	DDA	ulti_ex	6	MaxQuant;FragPipe		A1_ulti_ex_evidence.txt	A1_ulti_ex_peptides.txt	A1_ulti_ex_proteinGroups.txt	A1_ulti_ex_fragpipe_combined_ion.tsv	A1_ulti_ex_fragpipe_combined_peptide.tsv	A1_ulti_ex_fragpipe_combined_protein.tsv
B1_A_DIA_evo_ex_R1.raw	Round_robin_experiment	PYE1_B	A	DIA	evo_ex	1	DIANN;FragPipe	A1_evo_ex_report.tsv							A1_evo_ex_fragpipe_report.tsv
B1_A_DIA_evo_ex_R2.raw	Round_robin_experiment	PYE1_B	A	DIA	evo_ex	2	DIANN;FragPipe	A1_evo_ex_report.tsv							A1_evo_ex_fragpipe_report.tsv
B1_A_DIA_evo_ex_R3.raw	Round_robin_experiment	PYE1_B	A	DIA	evo_ex	3	DIANN;FragPipe	A1_evo_ex_report.tsv							A1_evo_ex_fragpipe_report.tsv
B1_A_DIA_evo_ex_R4.raw	Round_robin_experiment	PYE1_B	A	DIA	evo_ex	4	DIANN;FragPipe	A1_evo_ex_report.tsv							A1_evo_ex_fragpipe_report.tsv
B1_A_DIA_evo_ex_R5.raw	Round_robin_experiment	PYE1_B	A	DIA	evo_ex	5	DIANN;FragPipe	A1_evo_ex_report.tsv							A1_evo_ex_fragpipe_report.tsv
B1_A_DIA_evo_ex_R6.raw	Round_robin_experiment	PYE1_B	A	DIA	evo_ex	6	DIANN;FragPipe	A1_evo_ex_report.tsv							A1_evo_ex_fragpipe_report.tsv
B1_A_DIA_ulti_ex_R1.raw	Round_robin_experiment	PYE1_B	A	DIA	ulti_ex	1	DIANN;FragPipe	A1_ulti_ex_report.tsv							A1_ulti_ex_fragpipe_report.tsv
B1_A_DIA_ulti_ex_R2.raw	Round_robin_experiment	PYE1_B	A	DIA	ulti_ex	2	DIANN;FragPipe	A1_ulti_ex_report.tsv							A1_ulti_ex_fragpipe_report.tsv
B1_A_DIA_ulti_ex_R3.raw	Round_robin_experiment	PYE1_B	A	DIA	ulti_ex	3	DIANN;FragPipe	A1_ulti_ex_report.tsv							A1_ulti_ex_fragpipe_report.tsv
B1_A_DIA_ulti_ex_R4.raw	Round_robin_experiment	PYE1_B	A	DIA	ulti_ex	4	DIANN;FragPipe	A1_ulti_ex_report.tsv							A1_ulti_ex_fragpipe_report.tsv
B1_A_DIA_ulti_ex_R5.raw	Round_robin_experiment	PYE1_B	A	DIA	ulti_ex	5	DIANN;FragPipe	A1_ulti_ex_report.tsv							A1_ulti_ex_fragpipe_report.tsv
B1_A_DIA_ulti_ex_R6.raw	Round_robin_experiment	PYE1_B	A	DIA	ulti_ex	6	DIANN;FragPipe	A1_ulti_ex_report.tsv							A1_ulti_ex_fragpipe_report.tsv
B1_B_DDA_ulti_HF_R1.raw	Round_robin_experiment	PYE1_B	B	DDA	ulti_HF	1	MaxQuant;FragPipe		B1_ulti_HF_evidence.txt	B1_ulti_HF_peptides.txt	B1_ulti_HF_proteinGroups.txt	B1_ulti_HF_fragpipe_combined_ion.tsv	B1_ulti_HF_fragpipe_combined_peptide.tsv	B1_ulti_HF_fragpipe_combined_protein.tsv
B1_B_DDA_ulti_HF_R2.raw	Round_robin_experiment	PYE1_B	B	DDA	ulti_HF	2	MaxQuant;FragPipe		B1_ulti_HF_evidence.txt	B1_ulti_HF_peptides.txt	B1_ulti_HF_proteinGroups.txt	B1_ulti_HF_fragpipe_combined_ion.tsv	B1_ulti_HF_fragpipe_combined_peptide.tsv	B1_ulti_HF_fragpipe_combined_protein.tsv
B1_B_DDA_ulti_HF_R3.raw	Round_robin_experiment	PYE1_B	B	DDA	ulti_HF	3	MaxQuant;FragPipe		B1_ulti_HF_evidence.txt	B1_ulti_HF_peptides.txt	B1_ulti_HF_proteinGroups.txt	B1_ulti_HF_fragpipe_combined_ion.tsv	B1_ulti_HF_fragpipe_combined_peptide.tsv	B1_ulti_HF_fragpipe_combined_protein.tsv
B1_B_DDA_ulti_HF_R4.raw	Round_robin_experiment	PYE1_B	B	DDA	ulti_HF	4	MaxQuant;FragPipe		B1_ulti_HF_evidence.txt	B1_ulti_HF_peptides.txt	B1_ulti_HF_proteinGroups.txt	B1_ulti_HF_fragpipe_combined_ion.tsv	B1_ulti_HF_fragpipe_combined_peptide.tsv	B1_ulti_HF_fragpipe_combined_protein.tsv
B1_B_DDA_ulti_HF_R5.raw	Round_robin_experiment	PYE1_B	B	DDA	ulti_HF	5	MaxQuant;FragPipe		B1_ulti_HF_evidence.txt	B1_ulti_HF_peptides.txt	B1_ulti_HF_proteinGroups.txt	B1_ulti_HF_fragpipe_combined_ion.tsv	B1_ulti_HF_fragpipe_combined_peptide.tsv	B1_ulti_HF_fragpipe_combined_protein.tsv
B1_B_DDA_ulti_HF_R6.raw	Round_robin_experiment	PYE1_B	B	DDA	ulti_HF	6	MaxQuant;FragPipe		B1_ulti_HF_evidence.txt	B1_ulti_HF_peptides.txt	B1_ulti_HF_proteinGroups.txt	B1_ulti_HF_fragpipe_combined_ion.tsv	B1_ulti_HF_fragpipe_combined_peptide.tsv	B1_ulti_HF_fragpipe_combined_protein.tsv
B1_B_DDA_ulti_HFX_R1.raw	Round_robin_experiment	PYE1_B	B	DDA	ulti_HFX	1	MaxQuant;FragPipe		B1_ulti_HFX_evidence.txt	B1_ulti_HFX_peptides.txt	B1_ulti_HFX_proteinGroups.txt	B1_ulti_HFX_fragpipe_combined_ion.tsv	B1_ulti_HFX_fragpipe_combined_peptide.tsv	B1_ulti_HFX_fragpipe_combined_protein.tsv
B1_B_DDA_ulti_HFX_R2.raw	Round_robin_experiment	PYE1_B	B	DDA	ulti_HFX	2	MaxQuant;FragPipe		B1_ulti_HFX_evidence.txt	B1_ulti_HFX_peptides.txt	B1_ulti_HFX_proteinGroups.txt	B1_ulti_HFX_fragpipe_combined_ion.tsv	B1_ulti_HFX_fragpipe_combined_peptide.tsv	B1_ulti_HFX_fragpipe_combined_protein.tsv
B1_B_DDA_ulti_HFX_R3.raw	Round_robin_experiment	PYE1_B	B	DDA	ulti_HFX	3	MaxQuant;FragPipe		B1_ulti_HFX_evidence.txt	B1_ulti_HFX_peptides.txt	B1_ulti_HFX_proteinGroups.txt	B1_ulti_HFX_fragpipe_combined_ion.tsv	B1_ulti_HFX_fragpipe_combined_peptide.tsv	B1_ulti_HFX_fragpipe_combined_protein.tsv
B1_B_DDA_ulti_HFX_R4.raw	Round_robin_experiment	PYE1_B	B	DDA	ulti_HFX	4	MaxQuant;FragPipe		B1_ulti_HFX_evidence.txt	B1_ulti_HFX_peptides.txt	B1_ulti_HFX_proteinGroups.txt	B1_ulti_HFX_fragpipe_combined_ion.tsv	B1_ulti_HFX_fragpipe_combined_peptide.tsv	B1_ulti_HFX_fragpipe_combined_protein.tsv
B1_B_DDA_ulti_HFX_R5.raw	Round_robin_experiment	PYE1_B	B	DDA	ulti_HFX	5	MaxQuant;FragPipe		B1_ulti_HFX_evidence.txt	B1_ulti_HFX_peptides.txt	B1_ulti_HFX_proteinGroups.txt	B1_ulti_HFX_fragpipe_combined_ion.tsv	B1_ulti_HFX_fragpipe_combined_peptide.tsv	B1_ulti_HFX_fragpipe_combined_protein.tsv
B1_B_DDA_ulti_HFX_R6.raw	Round_robin_experiment	PYE1_B	B	DDA	ulti_HFX	6	MaxQuant;FragPipe		B1_ulti_HFX_evidence.txt	B1_ulti_HFX_peptides.txt	B1_ulti_HFX_proteinGroups.txt	B1_ulti_HFX_fragpipe_combined_ion.tsv	B1_ulti_HFX_fragpipe_combined_peptide.tsv	B1_ulti_HFX_fragpipe_combined_protein.tsv
B1_B_DIA_ulti_HF_R1.raw	Round_robin_experiment	PYE1_B	B	DIA	ulti_HF	1	DIANN;FragPipe	B1_ulti_HF_report.tsv							B1_ulti_HF_fragpipe_report.tsv
B1_B_DIA_ulti_HF_R2.raw	Round_robin_experiment	PYE1_B	B	DIA	ulti_HF	2	DIANN;FragPipe	B1_ulti_HF_report.tsv							B1_ulti_HF_fragpipe_report.tsv
B1_B_DIA_ulti_HF_R3.raw	Round_robin_experiment	PYE1_B	B	DIA	ulti_HF	3	DIANN;FragPipe	B1_ulti_HF_report.tsv							B1_ulti_HF_fragpipe_report.tsv
B1_B_DIA_ulti_HF_R4.raw	Round_robin_experiment	PYE1_B	B	DIA	ulti_HF	4	DIANN;FragPipe	B1_ulti_HF_report.tsv							B1_ulti_HF_fragpipe_report.tsv
B1_B_DIA_ulti_HF_R5.raw	Round_robin_experiment	PYE1_B	B	DIA	ulti_HF	5	DIANN;FragPipe	B1_ulti_HF_report.tsv							B1_ulti_HF_fragpipe_report.tsv
B1_B_DIA_ulti_HF_R6.raw	Round_robin_experiment	PYE1_B	B	DIA	ulti_HF	6	DIANN;FragPipe	B1_ulti_HF_report.tsv							B1_ulti_HF_fragpipe_report.tsv
B1_B_DIA_ulti_HFX_R1.raw	Round_robin_experiment	PYE1_B	B	DIA	ulti_HFX	1	DIANN;FragPipe	B1_ulti_HFX_report.tsv							B1_ulti_HFX_fragpipe_report.tsv
B1_B_DIA_ulti_HFX_R2.raw	Round_robin_experiment	PYE1_B	B	DIA	ulti_HFX	2	DIANN;FragPipe	B1_ulti_HFX_report.tsv							B1_ulti_HFX_fragpipe_report.tsv
B1_B_DIA_ulti_HFX_R3.raw	Round_robin_experiment	PYE1_B	B	DIA	ulti_HFX	3	DIANN;FragPipe	B1_ulti_HFX_report.tsv							B1_ulti_HFX_fragpipe_report.tsv
B1_B_DIA_ulti_HFX_R4.raw	Round_robin_experiment	PYE1_B	B	DIA	ulti_HFX	4	DIANN;FragPipe	B1_ulti_HFX_report.tsv							B1_ulti_HFX_fragpipe_report.tsv
B1_B_DIA_ulti_HFX_R5.raw	Round_robin_experiment	PYE1_B	B	DIA	ulti_HFX	5	DIANN;FragPipe	B1_ulti_HFX_report.tsv							B1_ulti_HFX_fragpipe_report.tsv
B1_B_DIA_ulti_HFX_R6.raw	Round_robin_experiment	PYE1_B	B	DIA	ulti_HFX	6	DIANN;FragPipe	B1_ulti_HFX_report.tsv							B1_ulti_HFX_fragpipe_report.tsv
B1_D_DDA_Vanq_ex_R1.raw	Round_robin_experiment	PYE1_B	D	DDA	Vanq_ex	1	MaxQuant;FragPipe		D1_Vanq_ex_evidence.txt	D1_Vanq_ex_peptides.txt	D1_Vanq_ex_proteinGroups.txt	D1_Vanq_ex_fragpipe_combined_ion.tsv	D1_Vanq_ex_fragpipe_combined_peptide.tsv	D1_Vanq_ex_fragpipe_combined_protein.tsv
B1_D_DDA_Vanq_ex_R2.raw	Round_robin_experiment	PYE1_B	D	DDA	Vanq_ex	2	MaxQuant;FragPipe		D1_Vanq_ex_evidence.txt	D1_Vanq_ex_peptides.txt	D1_Vanq_ex_proteinGroups.txt	D1_Vanq_ex_fragpipe_combined_ion.tsv	D1_Vanq_ex_fragpipe_combined_peptide.tsv	D1_Vanq_ex_fragpipe_combined_protein.tsv
B1_D_DDA_Vanq_ex_R3.raw	Round_robin_experiment	PYE1_B	D	DDA	Vanq_ex	3	MaxQuant;FragPipe		D1_Vanq_ex_evidence.txt	D1_Vanq_ex_peptides.txt	D1_Vanq_ex_proteinGroups.txt	D1_Vanq_ex_fragpipe_combined_ion.tsv	D1_Vanq_ex_fragpipe_combined_peptide.tsv	D1_Vanq_ex_fragpipe_combined_protein.tsv
B1_D_DDA_Vanq_ex_R4.raw	Round_robin_experiment	PYE1_B	D	DDA	Vanq_ex	4	MaxQuant;FragPipe		D1_Vanq_ex_evidence.txt	D1_Vanq_ex_peptides.txt	D1_Vanq_ex_proteinGroups.txt	D1_Vanq_ex_fragpipe_combined_ion.tsv	D1_Vanq_ex_fragpipe_combined_peptide.tsv	D1_Vanq_ex_fragpipe_combined_protein.tsv
B1_D_DDA_Vanq_ex_R5.raw	Round_robin_experiment	PYE1_B	D	DDA	Vanq_ex	5	MaxQuant;FragPipe		D1_Vanq_ex_evidence.txt	D1_Vanq_ex_peptides.txt	D1_Vanq_ex_proteinGroups.txt	D1_Vanq_ex_fragpipe_combined_ion.tsv	D1_Vanq_ex_fragpipe_combined_peptide.tsv	D1_Vanq_ex_fragpipe_combined_protein.tsv
B1_D_DDA_ulti_ecl_R1.raw	Round_robin_experiment	PYE1_B	D	DDA	ulti_ecl	1	MaxQuant;FragPipe		D1_ulti_ecl_evidence.txt	D1_ulti_ecl_peptides.txt	D1_ulti_ecl_proteinGroups.txt	D1_ulti_ecl_fragpipe_combined_ion.tsv	D1_ulti_ecl_fragpipe_combined_peptide.tsv	D1_ulti_ecl_fragpipe_combined_protein.tsv
B1_D_DDA_ulti_ecl_R2.raw	Round_robin_experiment	PYE1_B	D	DDA	ulti_ecl	2	MaxQuant;FragPipe		D1_ulti_ecl_evidence.txt	D1_ulti_ecl_peptides.txt	D1_ulti_ecl_proteinGroups.txt	D1_ulti_ecl_fragpipe_combined_ion.tsv	D1_ulti_ecl_fragpipe_combined_peptide.tsv	D1_ulti_ecl_fragpipe_combined_protein.tsv
B1_D_DDA_ulti_ecl_R3.raw	Round_robin_experiment	PYE1_B	D	DDA	ulti_ecl	3	MaxQuant;FragPipe		D1_ulti_ecl_evidence.txt	D1_ulti_ecl_peptides.txt	D1_ulti_ecl_proteinGroups.txt	D1_ulti_ecl_fragpipe_combined_ion.tsv	D1_ulti_ecl_fragpipe_combined_peptide.tsv	D1_ulti_ecl_fragpipe_combined_protein.tsv
B1_D_DDA_ulti_ecl_R4.raw	Round_robin_experiment	PYE1_B	D	DDA	ulti_ecl	4	MaxQuant;FragPipe		D1_ulti_ecl_evidence.txt	D1_ulti_ecl_peptides.txt	D1_ulti_ecl_proteinGroups.txt	D1_ulti_ecl_fragpipe_combined_ion.tsv	D1_ulti_ecl_fragpipe_combined_peptide.tsv	D1_ulti_ecl_fragpipe_combined_protein.tsv
B1_D_DDA_ulti_ecl_R5.raw	Round_robin_experiment	PYE1_B	D	DDA	ulti_ecl	5	MaxQuant;FragPipe		D1_ulti_ecl_evidence.txt	D1_ulti_ecl_peptides.txt	D1_ulti_ecl_proteinGroups.txt	D1_ulti_ecl_fragpipe_combined_ion.tsv	D1_ulti_ecl_fragpipe_combined_peptide.tsv	D1_ulti_ecl_fragpipe_combined_protein.tsv
B1_D_DDA_ulti_ecl_R6.raw	Round_robin_experiment	PYE1_B	D	DDA	ulti_ecl	6	MaxQuant;FragPipe		D1_ulti_ecl_evidence.txt	D1_ulti_ecl_peptides.txt	D1_ulti_ecl_proteinGroups.txt	D1_ulti_ecl_fragpipe_combined_ion.tsv	D1_ulti_ecl_fragpipe_combined_peptide.tsv	D1_ulti_ecl_fragpipe_combined_protein.tsv
B1_D_DIA_Vanq_ex_R1.raw	Round_robin_experiment	PYE1_B	D	DIA	Vanq_ex	1	DIANN;FragPipe	D1_Vanq_ex_report.tsv							D1_Vanq_ex_fragpipe_report.tsv
B1_D_DIA_Vanq_ex_R2.raw	Round_robin_experiment	PYE1_B	D	DIA	Vanq_ex	2	DIANN;FragPipe	D1_Vanq_ex_report.tsv							D1_Vanq_ex_fragpipe_report.tsv
B1_D_DIA_Vanq_ex_R3.raw	Round_robin_experiment	PYE1_B	D	DIA	Vanq_ex	3	DIANN;FragPipe	D1_Vanq_ex_report.tsv							D1_Vanq_ex_fragpipe_report.tsv
B1_D_DIA_Vanq_ex_R4.raw	Round_robin_experiment	PYE1_B	D	DIA	Vanq_ex	4	DIANN;FragPipe	D1_Vanq_ex_report.tsv							D1_Vanq_ex_fragpipe_report.tsv
B1_D_DIA_Vanq_ex_R5.raw	Round_robin_experiment	PYE1_B	D	DIA	Vanq_ex	5	DIANN;FragPipe	D1_Vanq_ex_report.tsv							D1_Vanq_ex_fragpipe_report.tsv
B1_D_DIA_Vanq_ex_R6.raw	Round_robin_experiment	PYE1_B	D	DIA	Vanq_ex	6	DIANN;FragPipe	D1_Vanq_ex_report.tsv							D1_Vanq_ex_fragpipe_report.tsv
B1_D_DIA_ulti_ecl_R1.raw	Round_robin_experiment	PYE1_B	D	DIA	ulti_ecl	1	DIANN;FragPipe	D1_ulti_ecl_report.tsv							D1_ulti_ecl_fragpipe_report.tsv
B1_D_DIA_ulti_ecl_R2.raw	Round_robin_experiment	PYE1_B	D	DIA	ulti_ecl	2	DIANN;FragPipe	D1_ulti_ecl_report.tsv							D1_ulti_ecl_fragpipe_report.tsv
B1_D_DIA_ulti_ecl_R3.raw	Round_robin_experiment	PYE1_B	D	DIA	ulti_ecl	3	DIANN;FragPipe	D1_ulti_ecl_report.tsv							D1_ulti_ecl_fragpipe_report.tsv
B1_D_DIA_ulti_ecl_R4.raw	Round_robin_experiment	PYE1_B	D	DIA	ulti_ecl	4	DIANN;FragPipe	D1_ulti_ecl_report.tsv							D1_ulti_ecl_fragpipe_report.tsv
B1_D_DIA_ulti_ecl_R5.raw	Round_robin_experiment	PYE1_B	D	DIA	ulti_ecl	5	DIANN;FragPipe	D1_ulti_ecl_report.tsv							D1_ulti_ecl_fragpipe_report.tsv
B1_D_DIA_ulti_ecl_R6.raw	Round_robin_experiment	PYE1_B	D	DIA	ulti_ecl	6	DIANN;FragPipe	D1_ulti_ecl_report.tsv							D1_ulti_ecl_fragpipe_report.tsv
B1_E_DDA_Vanq_ex_R1.raw	Round_robin_experiment	PYE1_B	E	DDA	Vanq_ex	1	MaxQuant;FragPipe		E1_Vanq_ex_evidence.txt	E1_Vanq_ex_peptides.txt	E1_Vanq_ex_proteinGroups.txt	E1_Vanq_ex_fragpipe_combined_ion.tsv	E1_Vanq_ex_fragpipe_combined_peptide.tsv	E1_Vanq_ex_fragpipe_combined_protein.tsv
B1_E_DDA_Vanq_ex_R2.raw	Round_robin_experiment	PYE1_B	E	DDA	Vanq_ex	2	MaxQuant;FragPipe		E1_Vanq_ex_evidence.txt	E1_Vanq_ex_peptides.txt	E1_Vanq_ex_proteinGroups.txt	E1_Vanq_ex_fragpipe_combined_ion.tsv	E1_Vanq_ex_fragpipe_combined_peptide.tsv	E1_Vanq_ex_fragpipe_combined_protein.tsv
B1_E_DDA_Vanq_ex_R3.raw	Round_robin_experiment	PYE1_B	E	DDA	Vanq_ex	3	MaxQuant;FragPipe		E1_Vanq_ex_evidence.txt	E1_Vanq_ex_peptides.txt	E1_Vanq_ex_proteinGroups.txt	E1_Vanq_ex_fragpipe_combined_ion.tsv	E1_Vanq_ex_fragpipe_combined_peptide.tsv	E1_Vanq_ex_fragpipe_combined_protein.tsv
B1_E_DDA_Vanq_ex_R4.raw	Round_robin_experiment	PYE1_B	E	DDA	Vanq_ex	4	MaxQuant;FragPipe		E1_Vanq_ex_evidence.txt	E1_Vanq_ex_peptides.txt	E1_Vanq_ex_proteinGroups.txt	E1_Vanq_ex_fragpipe_combined_ion.tsv	E1_Vanq_ex_fragpipe_combined_peptide.tsv	E1_Vanq_ex_fragpipe_combined_protein.tsv
B1_E_DDA_Vanq_ex_R5.raw	Round_robin_experiment	PYE1_B	E	DDA	Vanq_ex	5	MaxQuant;FragPipe		E1_Vanq_ex_evidence.txt	E1_Vanq_ex_peptides.txt	E1_Vanq_ex_proteinGroups.txt	E1_Vanq_ex_fragpipe_combined_ion.tsv	E1_Vanq_ex_fragpipe_combined_peptide.tsv	E1_Vanq_ex_fragpipe_combined_protein.tsv
B1_E_DDA_ulti_lumos_R1.raw	Round_robin_experiment	PYE1_B	E	DDA	ulti_lumos	1	MaxQuant;FragPipe		E1_ulti_lumos_evidence.txt	E1_ulti_lumos_peptides.txt	E1_ulti_lumos_proteinGroups.txt	E1_ulti_lumos_fragpipe_combined_ion.tsv	E1_ulti_lumos_fragpipe_combined_peptide.tsv	E1_ulti_lumos_fragpipe_combined_protein.tsv
B1_E_DDA_ulti_lumos_R2.raw	Round_robin_experiment	PYE1_B	E	DDA	ulti_lumos	2	MaxQuant;FragPipe		E1_ulti_lumos_evidence.txt	E1_ulti_lumos_peptides.txt	E1_ulti_lumos_proteinGroups.txt	E1_ulti_lumos_fragpipe_combined_ion.tsv	E1_ulti_lumos_fragpipe_combined_peptide.tsv	E1_ulti_lumos_fragpipe_combined_protein.tsv
B1_E_DDA_ulti_lumos_R3.raw	Round_robin_experiment	PYE1_B	E	DDA	ulti_lumos	3	MaxQuant;FragPipe		E1_ulti_lumos_evidence.txt	E1_ulti_lumos_peptides.txt	E1_ulti_lumos_proteinGroups.txt	E1_ulti_lumos_fragpipe_combined_ion.tsv	E1_ulti_lumos_fragpipe_combined_peptide.tsv	E1_ulti_lumos_fragpipe_combined_protein.tsv
B1_E_DDA_ulti_lumos_R4.raw	Round_robin_experiment	PYE1_B	E	DDA	ulti_lumos	4	MaxQuant;FragPipe		E1_ulti_lumos_evidence.txt	E1_ulti_lumos_peptides.txt	E1_ulti_lumos_proteinGroups.txt	E1_ulti_lumos_fragpipe_combined_ion.tsv	E1_ulti_lumos_fragpipe_combined_peptide.tsv	E1_ulti_lumos_fragpipe_combined_protein.tsv
B1_E_DDA_ulti_lumos_R5.raw	Round_robin_experiment	PYE1_B	E	DDA	ulti_lumos	5	MaxQuant;FragPipe		E1_ulti_lumos_evidence.txt	E1_ulti_lumos_peptides.txt	E1_ulti_lumos_proteinGroups.txt	E1_ulti_lumos_fragpipe_combined_ion.tsv	E1_ulti_lumos_fragpipe_combined_peptide.tsv	E1_ulti_lumos_fragpipe_combined_protein.tsv
B1_E_DDA_ulti_lumos_R6.raw	Round_robin_experiment	PYE1_B	E	DDA	ulti_lumos	6	MaxQuant;FragPipe		E1_ulti_lumos_evidence.txt	E1_ulti_lumos_peptides.txt	E1_ulti_lumos_proteinGroups.txt	E1_ulti_lumos_fragpipe_combined_ion.tsv	E1_ulti_lumos_fragpipe_combined_peptide.tsv	E1_ulti_lumos_fragpipe_combined_protein.tsv
B1_E_DIA_Vanq_ex_R1.raw	Round_robin_experiment	PYE1_B	E	DIA	Vanq_ex	1	DIANN;FragPipe	E1_Vanq_ex_report.tsv							E1_Vanq_ex_fragpipe_report.tsv
B1_E_DIA_Vanq_ex_R2.raw	Round_robin_experiment	PYE1_B	E	DIA	Vanq_ex	2	DIANN;FragPipe	E1_Vanq_ex_report.tsv							E1_Vanq_ex_fragpipe_report.tsv
B1_E_DIA_Vanq_ex_R3.raw	Round_robin_experiment	PYE1_B	E	DIA	Vanq_ex	3	DIANN;FragPipe	E1_Vanq_ex_report.tsv							E1_Vanq_ex_fragpipe_report.tsv
B1_E_DIA_Vanq_ex_R4.raw	Round_robin_experiment	PYE1_B	E	DIA	Vanq_ex	4	DIANN;FragPipe	E1_Vanq_ex_report.tsv							E1_Vanq_ex_fragpipe_report.tsv
B1_E_DIA_Vanq_ex_R5.raw	Round_robin_experiment	PYE1_B	E	DIA	Vanq_ex	5	DIANN;FragPipe	E1_Vanq_ex_report.tsv							E1_Vanq_ex_fragpipe_report.tsv
B1_E_DIA_ulti_lumos_R1.raw	Round_robin_experiment	PYE1_B	E	DIA	ulti_lumos	1	DIANN;FragPipe	E1_ulti_lumos_report.tsv							E1_ulti_lumos_fragpipe_report.tsv
B1_E_DIA_ulti_lumos_R2.raw	Round_robin_experiment	PYE1_B	E	DIA	ulti_lumos	2	DIANN;FragPipe	E1_ulti_lumos_report.tsv							E1_ulti_lumos_fragpipe_report.tsv
B1_E_DIA_ulti_lumos_R3.raw	Round_robin_experiment	PYE1_B	E	DIA	ulti_lumos	3	DIANN;FragPipe	E1_ulti_lumos_report.tsv							E1_ulti_lumos_fragpipe_report.tsv
B1_E_DIA_ulti_lumos_R4.raw	Round_robin_experiment	PYE1_B	E	DIA	ulti_lumos	4	DIANN;FragPipe	E1_ulti_lumos_report.tsv							E1_ulti_lumos_fragpipe_report.tsv
B1_E_DIA_ulti_lumos_R5.raw	Round_robin_experiment	PYE1_B	E	DIA	ulti_lumos	5	DIANN;FragPipe	E1_ulti_lumos_report.tsv							E1_ulti_lumos_fragpipe_report.tsv
B1_E_DIA_ulti_lumos_R6.raw	Round_robin_experiment	PYE1_B	E	DIA	ulti_lumos	6	DIANN;FragPipe	E1_ulti_lumos_report.tsv							E1_ulti_lumos_fragpipe_report.tsv
B1_F_DDA_Vanq_ecl_R1.raw	Round_robin_experiment	PYE1_B	F	DDA	Vanq_ecl	1	MaxQuant;FragPipe		F1_Vanq_ecl_evidence.txt	F1_Vanq_ecl_peptides.txt	F1_Vanq_ecl_proteinGroups.txt	F1_Vanq_ecl_fragpipe_combined_ion.tsv	F1_Vanq_ecl_fragpipe_combined_peptide.tsv	F1_Vanq_ecl_fragpipe_combined_protein.tsv
B1_F_DDA_Vanq_ecl_R2.raw	Round_robin_experiment	PYE1_B	F	DDA	Vanq_ecl	2	MaxQuant;FragPipe		F1_Vanq_ecl_evidence.txt	F1_Vanq_ecl_peptides.txt	F1_Vanq_ecl_proteinGroups.txt	F1_Vanq_ecl_fragpipe_combined_ion.tsv	F1_Vanq_ecl_fragpipe_combined_peptide.tsv	F1_Vanq_ecl_fragpipe_combined_protein.tsv
B1_F_DDA_Vanq_ecl_R3.raw	Round_robin_experiment	PYE1_B	F	DDA	Vanq_ecl	3	MaxQuant;FragPipe		F1_Vanq_ecl_evidence.txt	F1_Vanq_ecl_peptides.txt	F1_Vanq_ecl_proteinGroups.txt	F1_Vanq_ecl_fragpipe_combined_ion.tsv	F1_Vanq_ecl_fragpipe_combined_peptide.tsv	F1_Vanq_ecl_fragpipe_combined_protein.tsv
B1_F_DDA_Vanq_ecl_R4.raw	Round_robin_experiment	PYE1_B	F	DDA	Vanq_ecl	4	MaxQuant;FragPipe		F1_Vanq_ecl_evidence.txt	F1_Vanq_ecl_peptides.txt	F1_Vanq_ecl_proteinGroups.txt	F1_Vanq_ecl_fragpipe_combined_ion.tsv	F1_Vanq_ecl_fragpipe_combined_peptide.tsv	F1_Vanq_ecl_fragpipe_combined_protein.tsv
B1_F_DDA_Vanq_ecl_R5.raw	Round_robin_experiment	PYE1_B	F	DDA	Vanq_ecl	5	MaxQuant;FragPipe		F1_Vanq_ecl_evidence.txt	F1_Vanq_ecl_peptides.txt	F1_Vanq_ecl_proteinGroups.txt	F1_Vanq_ecl_fragpipe_combined_ion.tsv	F1_Vanq_ecl_fragpipe_combined_peptide.tsv	F1_Vanq_ecl_fragpipe_combined_protein.tsv
B1_F_DDA_Vanq_ecl_R6.raw	Round_robin_experiment	PYE1_B	F	DDA	Vanq_ecl	6	MaxQuant;FragPipe		F1_Vanq_ecl_evidence.txt	F1_Vanq_ecl_peptides.txt	F1_Vanq_ecl_proteinGroups.txt	F1_Vanq_ecl_fragpipe_combined_ion.tsv	F1_Vanq_ecl_fragpipe_combined_peptide.tsv	F1_Vanq_ecl_fragpipe_combined_protein.tsv
B1_G_DDA_ulti_ex_R1.raw	Round_robin_experiment	PYE1_B	G	DDA	ulti_ex	1	MaxQuant;FragPipe		G1_ulti_ex_evidence.txt	G1_ulti_ex_peptides.txt	G1_ulti_ex_proteinGroups.txt	G1_ulti_ex_fragpipe_combined_ion.tsv	G1_ulti_ex_fragpipe_combined_peptide.tsv	G1_ulti_ex_fragpipe_combined_protein.tsv
B1_G_DDA_ulti_ex_R2.raw	Round_robin_experiment	PYE1_B	G	DDA	ulti_ex	2	MaxQuant;FragPipe		G1_ulti_ex_evidence.txt	G1_ulti_ex_peptides.txt	G1_ulti_ex_proteinGroups.txt	G1_ulti_ex_fragpipe_combined_ion.tsv	G1_ulti_ex_fragpipe_combined_peptide.tsv	G1_ulti_ex_fragpipe_combined_protein.tsv
B1_G_DDA_ulti_ex_R3.raw	Round_robin_experiment	PYE1_B	G	DDA	ulti_ex	3	MaxQuant;FragPipe		G1_ulti_ex_evidence.txt	G1_ulti_ex_peptides.txt	G1_ulti_ex_proteinGroups.txt	G1_ulti_ex_fragpipe_combined_ion.tsv	G1_ulti_ex_fragpipe_combined_peptide.tsv	G1_ulti_ex_fragpipe_combined_protein.tsv
B1_G_DDA_ulti_ex_R4.raw	Round_robin_experiment	PYE1_B	G	DDA	ulti_ex	4	MaxQuant;FragPipe		G1_ulti_ex_evidence.txt	G1_ulti_ex_peptides.txt	G1_ulti_ex_proteinGroups.txt	G1_ulti_ex_fragpipe_combined_ion.tsv	G1_ulti_ex_fragpipe_combined_peptide.tsv	G1_ulti_ex_fragpipe_combined_protein.tsv
B1_G_DDA_ulti_ex_R5.raw	Round_robin_experiment	PYE1_B	G	DDA	ulti_ex	5	MaxQuant;FragPipe		G1_ulti_ex_evidence.txt	G1_ulti_ex_peptides.txt	G1_ulti_ex_proteinGroups.txt	G1_ulti_ex_fragpipe_combined_ion.tsv	G1_ulti_ex_fragpipe_combined_peptide.tsv	G1_ulti_ex_fragpipe_combined_protein.tsv
B1_G_DDA_ulti_ex_R6.raw	Round_robin_experiment	PYE1_B	G	DDA	ulti_ex	6	MaxQuant;FragPipe		G1_ulti_ex_evidence.txt	G1_ulti_ex_peptides.txt	G1_ulti_ex_proteinGroups.txt	G1_ulti_ex_fragpipe_combined_ion.tsv	G1_ulti_ex_fragpipe_combined_peptide.tsv	G1_ulti_ex_fragpipe_combined_protein.tsv
B1_G_DIA_ulti_ex_R1.raw	Round_robin_experiment	PYE1_B	G	DIA	ulti_ex	1	DIANN;FragPipe	G1_ulti_ex_report.tsv							G1_ulti_ex_fragpipe_report.tsv
B1_G_DIA_ulti_ex_R2.raw	Round_robin_experiment	PYE1_B	G	DIA	ulti_ex	2	DIANN;FragPipe	G1_ulti_ex_report.tsv							G1_ulti_ex_fragpipe_report.tsv
B1_G_DIA_ulti_ex_R3.raw	Round_robin_experiment	PYE1_B	G	DIA	ulti_ex	3	DIANN;FragPipe	G1_ulti_ex_report.tsv							G1_ulti_ex_fragpipe_report.tsv
B1_G_DIA_ulti_ex_R4.raw	Round_robin_experiment	PYE1_B	G	DIA	ulti_ex	4	DIANN;FragPipe	G1_ulti_ex_report.tsv							G1_ulti_ex_fragpipe_report.tsv
B1_G_DIA_ulti_ex_R5.raw	Round_robin_experiment	PYE1_B	G	DIA	ulti_ex	5	DIANN;FragPipe	G1_ulti_ex_report.tsv							G1_ulti_ex_fragpipe_report.tsv
B1_G_DIA_ulti_ex_R6.raw	Round_robin_experiment	PYE1_B	G	DIA	ulti_ex	6	DIANN;FragPipe	G1_ulti_ex_report.tsv							G1_ulti_ex_fragpipe_report.tsv
B1_K_DIA_Mclass_zTOF_R1.wiff	Round_robin_experiment	PYE1_B	K	DIA	Mclass_zTOF	1	DIANN;FragPipe	K1_Mclass_zTOF_report.tsv							K1_Mclass_zTOF_fragpipe_report.tsv
B1_K_DIA_Mclass_zTOF_R1.wiff.scan	Round_robin_experiment	PYE1_B	K	DIA	Mclass_zTOF	1	DIANN;FragPipe	K1_Mclass_zTOF_report.tsv							K1_Mclass_zTOF_fragpipe_report.tsv
B1_K_DIA_Mclass_zTOF_R2.wiff	Round_robin_experiment	PYE1_B	K	DIA	Mclass_zTOF	2	DIANN;FragPipe	K1_Mclass_zTOF_report.tsv							K1_Mclass_zTOF_fragpipe_report.tsv
B1_K_DIA_Mclass_zTOF_R2.wiff.scan	Round_robin_experiment	PYE1_B	K	DIA	Mclass_zTOF	2	DIANN;FragPipe	K1_Mclass_zTOF_report.tsv							K1_Mclass_zTOF_fragpipe_report.tsv
B1_K_DIA_Mclass_zTOF_R3.wiff	Round_robin_experiment	PYE1_B	K	DIA	Mclass_zTOF	3	DIANN;FragPipe	K1_Mclass_zTOF_report.tsv							K1_Mclass_zTOF_fragpipe_report.tsv
B1_K_DIA_Mclass_zTOF_R3.wiff.scan	Round_robin_experiment	PYE1_B	K	DIA	Mclass_zTOF	3	DIANN;FragPipe	K1_Mclass_zTOF_report.tsv							K1_Mclass_zTOF_fragpipe_report.tsv
B1_K_DIA_Mclass_zTOF_R4.wiff	Round_robin_experiment	PYE1_B	K	DIA	Mclass_zTOF	4	DIANN;FragPipe	K1_Mclass_zTOF_report.tsv							K1_Mclass_zTOF_fragpipe_report.tsv
B1_K_DIA_Mclass_zTOF_R4.wiff.scan	Round_robin_experiment	PYE1_B	K	DIA	Mclass_zTOF	4	DIANN;FragPipe	K1_Mclass_zTOF_report.tsv							K1_Mclass_zTOF_fragpipe_report.tsv
B1_K_DIA_Mclass_zTOF_R5.wiff	Round_robin_experiment	PYE1_B	K	DIA	Mclass_zTOF	5	DIANN;FragPipe	K1_Mclass_zTOF_report.tsv							K1_Mclass_zTOF_fragpipe_report.tsv
B1_K_DIA_Mclass_zTOF_R5.wiff.scan	Round_robin_experiment	PYE1_B	K	DIA	Mclass_zTOF	5	DIANN;FragPipe	K1_Mclass_zTOF_report.tsv							K1_Mclass_zTOF_fragpipe_report.tsv
B1_K_DIA_Mclass_zTOF_R6.wiff	Round_robin_experiment	PYE1_B	K	DIA	Mclass_zTOF	6	DIANN;FragPipe	K1_Mclass_zTOF_report.tsv							K1_Mclass_zTOF_fragpipe_report.tsv
B1_K_DIA_Mclass_zTOF_R6.wiff.scan	Round_robin_experiment	PYE1_B	K	DIA	Mclass_zTOF	6	DIANN;FragPipe	K1_Mclass_zTOF_report.tsv							K1_Mclass_zTOF_fragpipe_report.tsv
B3_A_DDA_evo_ex_R1.raw	Round_robin_experiment	PYE3_B	A	DDA	evo_ex	1	MaxQuant;FragPipe		A3_evo_ex_evidence.txt	A3_evo_ex_peptides.txt	A3_evo_ex_proteinGroups.txt	A3_evo_ex_fragpipe_combined_ion.tsv	A3_evo_ex_fragpipe_combined_peptide.tsv	A3_evo_ex_fragpipe_combined_protein.tsv
B3_A_DDA_evo_ex_R2.raw	Round_robin_experiment	PYE3_B	A	DDA	evo_ex	2	MaxQuant;FragPipe		A3_evo_ex_evidence.txt	A3_evo_ex_peptides.txt	A3_evo_ex_proteinGroups.txt	A3_evo_ex_fragpipe_combined_ion.tsv	A3_evo_ex_fragpipe_combined_peptide.tsv	A3_evo_ex_fragpipe_combined_protein.tsv
B3_A_DDA_evo_ex_R3.raw	Round_robin_experiment	PYE3_B	A	DDA	evo_ex	3	MaxQuant;FragPipe		A3_evo_ex_evidence.txt	A3_evo_ex_peptides.txt	A3_evo_ex_proteinGroups.txt	A3_evo_ex_fragpipe_combined_ion.tsv	A3_evo_ex_fragpipe_combined_peptide.tsv	A3_evo_ex_fragpipe_combined_protein.tsv
B3_A_DDA_evo_ex_R4.raw	Round_robin_experiment	PYE3_B	A	DDA	evo_ex	4	MaxQuant;FragPipe		A3_evo_ex_evidence.txt	A3_evo_ex_peptides.txt	A3_evo_ex_proteinGroups.txt	A3_evo_ex_fragpipe_combined_ion.tsv	A3_evo_ex_fragpipe_combined_peptide.tsv	A3_evo_ex_fragpipe_combined_protein.tsv
B3_A_DDA_evo_ex_R5.raw	Round_robin_experiment	PYE3_B	A	DDA	evo_ex	5	MaxQuant;FragPipe		A3_evo_ex_evidence.txt	A3_evo_ex_peptides.txt	A3_evo_ex_proteinGroups.txt	A3_evo_ex_fragpipe_combined_ion.tsv	A3_evo_ex_fragpipe_combined_peptide.tsv	A3_evo_ex_fragpipe_combined_protein.tsv
B3_A_DDA_evo_ex_R6.raw	Round_robin_experiment	PYE3_B	A	DDA	evo_ex	6	MaxQuant;FragPipe		A3_evo_ex_evidence.txt	A3_evo_ex_peptides.txt	A3_evo_ex_proteinGroups.txt	A3_evo_ex_fragpipe_combined_ion.tsv	A3_evo_ex_fragpipe_combined_peptide.tsv	A3_evo_ex_fragpipe_combined_protein.tsv
B3_A_DDA_ulti_ex_R1.raw	Round_robin_experiment	PYE3_B	A	DDA	ulti_ex	1	MaxQuant;FragPipe		A3_ulti_ex_evidence.txt	A3_ulti_ex_peptides.txt	A3_ulti_ex_proteinGroups.txt	A3_ulti_ex_fragpipe_combined_ion.tsv	A3_ulti_ex_fragpipe_combined_peptide.tsv	A3_ulti_ex_fragpipe_combined_protein.tsv
B3_A_DDA_ulti_ex_R2.raw	Round_robin_experiment	PYE3_B	A	DDA	ulti_ex	2	MaxQuant;FragPipe		A3_ulti_ex_evidence.txt	A3_ulti_ex_peptides.txt	A3_ulti_ex_proteinGroups.txt	A3_ulti_ex_fragpipe_combined_ion.tsv	A3_ulti_ex_fragpipe_combined_peptide.tsv	A3_ulti_ex_fragpipe_combined_protein.tsv
B3_A_DDA_ulti_ex_R3.raw	Round_robin_experiment	PYE3_B	A	DDA	ulti_ex	3	MaxQuant;FragPipe		A3_ulti_ex_evidence.txt	A3_ulti_ex_peptides.txt	A3_ulti_ex_proteinGroups.txt	A3_ulti_ex_fragpipe_combined_ion.tsv	A3_ulti_ex_fragpipe_combined_peptide.tsv	A3_ulti_ex_fragpipe_combined_protein.tsv
B3_A_DDA_ulti_ex_R4.raw	Round_robin_experiment	PYE3_B	A	DDA	ulti_ex	4	MaxQuant;FragPipe		A3_ulti_ex_evidence.txt	A3_ulti_ex_peptides.txt	A3_ulti_ex_proteinGroups.txt	A3_ulti_ex_fragpipe_combined_ion.tsv	A3_ulti_ex_fragpipe_combined_peptide.tsv	A3_ulti_ex_fragpipe_combined_protein.tsv
B3_A_DDA_ulti_ex_R5.raw	Round_robin_experiment	PYE3_B	A	DDA	ulti_ex	5	MaxQuant;FragPipe		A3_ulti_ex_evidence.txt	A3_ulti_ex_peptides.txt	A3_ulti_ex_proteinGroups.txt	A3_ulti_ex_fragpipe_combined_ion.tsv	A3_ulti_ex_fragpipe_combined_peptide.tsv	A3_ulti_ex_fragpipe_combined_protein.tsv
B3_A_DDA_ulti_ex_R6.raw	Round_robin_experiment	PYE3_B	A	DDA	ulti_ex	6	MaxQuant;FragPipe		A3_ulti_ex_evidence.txt	A3_ulti_ex_peptides.txt	A3_ulti_ex_proteinGroups.txt	A3_ulti_ex_fragpipe_combined_ion.tsv	A3_ulti_ex_fragpipe_combined_peptide.tsv	A3_ulti_ex_fragpipe_combined_protein.tsv
B3_A_DIA_evo_ex_R1.raw	Round_robin_experiment	PYE3_B	A	DIA	evo_ex	1	DIANN;FragPipe	A3_evo_ex_report.tsv							A3_evo_ex_fragpipe_report.tsv
B3_A_DIA_evo_ex_R2.raw	Round_robin_experiment	PYE3_B	A	DIA	evo_ex	2	DIANN;FragPipe	A3_evo_ex_report.tsv							A3_evo_ex_fragpipe_report.tsv
B3_A_DIA_evo_ex_R3.raw	Round_robin_experiment	PYE3_B	A	DIA	evo_ex	3	DIANN;FragPipe	A3_evo_ex_report.tsv							A3_evo_ex_fragpipe_report.tsv
B3_A_DIA_evo_ex_R4.raw	Round_robin_experiment	PYE3_B	A	DIA	evo_ex	4	DIANN;FragPipe	A3_evo_ex_report.tsv							A3_evo_ex_fragpipe_report.tsv
B3_A_DIA_evo_ex_R5.raw	Round_robin_experiment	PYE3_B	A	DIA	evo_ex	5	DIANN;FragPipe	A3_evo_ex_report.tsv							A3_evo_ex_fragpipe_report.tsv
B3_A_DIA_evo_ex_R6.raw	Round_robin_experiment	PYE3_B	A	DIA	evo_ex	6	DIANN;FragPipe	A3_evo_ex_report.tsv							A3_evo_ex_fragpipe_report.tsv
B3_A_DIA_ulti_ex_R1.raw	Round_robin_experiment	PYE3_B	A	DIA	ulti_ex	1	DIANN;FragPipe	A3_ulti_ex_report.tsv							A3_ulti_ex_fragpipe_report.tsv
B3_A_DIA_ulti_ex_R2.raw	Round_robin_experiment	PYE3_B	A	DIA	ulti_ex	2	DIANN;FragPipe	A3_ulti_ex_report.tsv							A3_ulti_ex_fragpipe_report.tsv
B3_A_DIA_ulti_ex_R3.raw	Round_robin_experiment	PYE3_B	A	DIA	ulti_ex	3	DIANN;FragPipe	A3_ulti_ex_report.tsv							A3_ulti_ex_fragpipe_report.tsv
B3_A_DIA_ulti_ex_R4.raw	Round_robin_experiment	PYE3_B	A	DIA	ulti_ex	4	DIANN;FragPipe	A3_ulti_ex_report.tsv							A3_ulti_ex_fragpipe_report.tsv
B3_A_DIA_ulti_ex_R5.raw	Round_robin_experiment	PYE3_B	A	DIA	ulti_ex	5	DIANN;FragPipe	A3_ulti_ex_report.tsv							A3_ulti_ex_fragpipe_report.tsv
B3_A_DIA_ulti_ex_R6.raw	Round_robin_experiment	PYE3_B	A	DIA	ulti_ex	6	DIANN;FragPipe	A3_ulti_ex_report.tsv							A3_ulti_ex_fragpipe_report.tsv
B3_B_DDA_ulti_HF_R1.raw	Round_robin_experiment	PYE3_B	B	DDA	ulti_HF	1	MaxQuant;FragPipe		B3_ulti_HF_evidence.txt	B3_ulti_HF_peptides.txt	B3_ulti_HF_proteinGroups.txt	B3_ulti_HF_fragpipe_combined_ion.tsv	B3_ulti_HF_fragpipe_combined_peptide.tsv	B3_ulti_HF_fragpipe_combined_protein.tsv
B3_B_DDA_ulti_HF_R2.raw	Round_robin_experiment	PYE3_B	B	DDA	ulti_HF	2	MaxQuant;FragPipe		B3_ulti_HF_evidence.txt	B3_ulti_HF_peptides.txt	B3_ulti_HF_proteinGroups.txt	B3_ulti_HF_fragpipe_combined_ion.tsv	B3_ulti_HF_fragpipe_combined_peptide.tsv	B3_ulti_HF_fragpipe_combined_protein.tsv
B3_B_DDA_ulti_HF_R3.raw	Round_robin_experiment	PYE3_B	B	DDA	ulti_HF	3	MaxQuant;FragPipe		B3_ulti_HF_evidence.txt	B3_ulti_HF_peptides.txt	B3_ulti_HF_proteinGroups.txt	B3_ulti_HF_fragpipe_combined_ion.tsv	B3_ulti_HF_fragpipe_combined_peptide.tsv	B3_ulti_HF_fragpipe_combined_protein.tsv
B3_B_DDA_ulti_HF_R4.raw	Round_robin_experiment	PYE3_B	B	DDA	ulti_HF	4	MaxQuant;FragPipe		B3_ulti_HF_evidence.txt	B3_ulti_HF_peptides.txt	B3_ulti_HF_proteinGroups.txt	B3_ulti_HF_fragpipe_combined_ion.tsv	B3_ulti_HF_fragpipe_combined_peptide.tsv	B3_ulti_HF_fragpipe_combined_protein.tsv
B3_B_DDA_ulti_HF_R5.raw	Round_robin_experiment	PYE3_B	B	DDA	ulti_HF	5	MaxQuant;FragPipe		B3_ulti_HF_evidence.txt	B3_ulti_HF_peptides.txt	B3_ulti_HF_proteinGroups.txt	B3_ulti_HF_fragpipe_combined_ion.tsv	B3_ulti_HF_fragpipe_combined_peptide.tsv	B3_ulti_HF_fragpipe_combined_protein.tsv
B3_B_DDA_ulti_HF_R6.raw	Round_robin_experiment	PYE3_B	B	DDA	ulti_HF	6	MaxQuant;FragPipe		B3_ulti_HF_evidence.txt	B3_ulti_HF_peptides.txt	B3_ulti_HF_proteinGroups.txt	B3_ulti_HF_fragpipe_combined_ion.tsv	B3_ulti_HF_fragpipe_combined_peptide.tsv	B3_ulti_HF_fragpipe_combined_protein.tsv
B3_B_DDA_ulti_HFX_R1.raw	Round_robin_experiment	PYE3_B	B	DDA	ulti_HFX	1	MaxQuant;FragPipe		B3_ulti_HFX_evidence.txt	B3_ulti_HFX_peptides.txt	B3_ulti_HFX_proteinGroups.txt	B3_ulti_HFX_fragpipe_combined_ion.tsv	B3_ulti_HFX_fragpipe_combined_peptide.tsv	B3_ulti_HFX_fragpipe_combined_protein.tsv
B3_B_DDA_ulti_HFX_R2.raw	Round_robin_experiment	PYE3_B	B	DDA	ulti_HFX	2	MaxQuant;FragPipe		B3_ulti_HFX_evidence.txt	B3_ulti_HFX_peptides.txt	B3_ulti_HFX_proteinGroups.txt	B3_ulti_HFX_fragpipe_combined_ion.tsv	B3_ulti_HFX_fragpipe_combined_peptide.tsv	B3_ulti_HFX_fragpipe_combined_protein.tsv
B3_B_DDA_ulti_HFX_R3.raw	Round_robin_experiment	PYE3_B	B	DDA	ulti_HFX	3	MaxQuant;FragPipe		B3_ulti_HFX_evidence.txt	B3_ulti_HFX_peptides.txt	B3_ulti_HFX_proteinGroups.txt	B3_ulti_HFX_fragpipe_combined_ion.tsv	B3_ulti_HFX_fragpipe_combined_peptide.tsv	B3_ulti_HFX_fragpipe_combined_protein.tsv
B3_B_DDA_ulti_HFX_R4.raw	Round_robin_experiment	PYE3_B	B	DDA	ulti_HFX	4	MaxQuant;FragPipe		B3_ulti_HFX_evidence.txt	B3_ulti_HFX_peptides.txt	B3_ulti_HFX_proteinGroups.txt	B3_ulti_HFX_fragpipe_combined_ion.tsv	B3_ulti_HFX_fragpipe_combined_peptide.tsv	B3_ulti_HFX_fragpipe_combined_protein.tsv
B3_B_DDA_ulti_HFX_R5.raw	Round_robin_experiment	PYE3_B	B	DDA	ulti_HFX	5	MaxQuant;FragPipe		B3_ulti_HFX_evidence.txt	B3_ulti_HFX_peptides.txt	B3_ulti_HFX_proteinGroups.txt	B3_ulti_HFX_fragpipe_combined_ion.tsv	B3_ulti_HFX_fragpipe_combined_peptide.tsv	B3_ulti_HFX_fragpipe_combined_protein.tsv
B3_B_DDA_ulti_HFX_R6.raw	Round_robin_experiment	PYE3_B	B	DDA	ulti_HFX	6	MaxQuant;FragPipe		B3_ulti_HFX_evidence.txt	B3_ulti_HFX_peptides.txt	B3_ulti_HFX_proteinGroups.txt	B3_ulti_HFX_fragpipe_combined_ion.tsv	B3_ulti_HFX_fragpipe_combined_peptide.tsv	B3_ulti_HFX_fragpipe_combined_protein.tsv
B3_B_DIA_ulti_HF_R1.raw	Round_robin_experiment	PYE3_B	B	DIA	ulti_HF	1	DIANN;FragPipe	B3_ulti_HF_report.tsv							B3_ulti_HF_fragpipe_report.tsv
B3_B_DIA_ulti_HF_R2.raw	Round_robin_experiment	PYE3_B	B	DIA	ulti_HF	2	DIANN;FragPipe	B3_ulti_HF_report.tsv							B3_ulti_HF_fragpipe_report.tsv
B3_B_DIA_ulti_HF_R3.raw	Round_robin_experiment	PYE3_B	B	DIA	ulti_HF	3	DIANN;FragPipe	B3_ulti_HF_report.tsv							B3_ulti_HF_fragpipe_report.tsv
B3_B_DIA_ulti_HF_R4.raw	Round_robin_experiment	PYE3_B	B	DIA	ulti_HF	4	DIANN;FragPipe	B3_ulti_HF_report.tsv							B3_ulti_HF_fragpipe_report.tsv
B3_B_DIA_ulti_HF_R5.raw	Round_robin_experiment	PYE3_B	B	DIA	ulti_HF	5	DIANN;FragPipe	B3_ulti_HF_report.tsv							B3_ulti_HF_fragpipe_report.tsv
B3_B_DIA_ulti_HF_R6.raw	Round_robin_experiment	PYE3_B	B	DIA	ulti_HF	6	DIANN;FragPipe	B3_ulti_HF_report.tsv							B3_ulti_HF_fragpipe_report.tsv
B3_B_DIA_ulti_HFX_R1.raw	Round_robin_experiment	PYE3_B	B	DIA	ulti_HFX	1	DIANN;FragPipe	B3_ulti_HFX_report.tsv							B3_ulti_HFX_fragpipe_report.tsv
B3_B_DIA_ulti_HFX_R2.raw	Round_robin_experiment	PYE3_B	B	DIA	ulti_HFX	2	DIANN;FragPipe	B3_ulti_HFX_report.tsv							B3_ulti_HFX_fragpipe_report.tsv
B3_B_DIA_ulti_HFX_R3.raw	Round_robin_experiment	PYE3_B	B	DIA	ulti_HFX	3	DIANN;FragPipe	B3_ulti_HFX_report.tsv							B3_ulti_HFX_fragpipe_report.tsv
B3_B_DIA_ulti_HFX_R4.raw	Round_robin_experiment	PYE3_B	B	DIA	ulti_HFX	4	DIANN;FragPipe	B3_ulti_HFX_report.tsv							B3_ulti_HFX_fragpipe_report.tsv
B3_B_DIA_ulti_HFX_R5.raw	Round_robin_experiment	PYE3_B	B	DIA	ulti_HFX	5	DIANN;FragPipe	B3_ulti_HFX_report.tsv							B3_ulti_HFX_fragpipe_report.tsv
B3_B_DIA_ulti_HFX_R6.raw	Round_robin_experiment	PYE3_B	B	DIA	ulti_HFX	6	DIANN;FragPipe	B3_ulti_HFX_report.tsv							B3_ulti_HFX_fragpipe_report.tsv
B3_D_DDA_Vanq_ex_R1.raw	Round_robin_experiment	PYE3_B	D	DDA	Vanq_ex	1	MaxQuant;FragPipe		D3_Vanq_ex_evidence.txt	D3_Vanq_ex_peptides.txt	D3_Vanq_ex_proteinGroups.txt	D3_Vanq_ex_fragpipe_combined_ion.tsv	D3_Vanq_ex_fragpipe_combined_peptide.tsv	D3_Vanq_ex_fragpipe_combined_protein.tsv
B3_D_DDA_Vanq_ex_R2.raw	Round_robin_experiment	PYE3_B	D	DDA	Vanq_ex	2	MaxQuant;FragPipe		D3_Vanq_ex_evidence.txt	D3_Vanq_ex_peptides.txt	D3_Vanq_ex_proteinGroups.txt	D3_Vanq_ex_fragpipe_combined_ion.tsv	D3_Vanq_ex_fragpipe_combined_peptide.tsv	D3_Vanq_ex_fragpipe_combined_protein.tsv
B3_D_DDA_Vanq_ex_R3.raw	Round_robin_experiment	PYE3_B	D	DDA	Vanq_ex	3	MaxQuant;FragPipe		D3_Vanq_ex_evidence.txt	D3_Vanq_ex_peptides.txt	D3_Vanq_ex_proteinGroups.txt	D3_Vanq_ex_fragpipe_combined_ion.tsv	D3_Vanq_ex_fragpipe_combined_peptide.tsv	D3_Vanq_ex_fragpipe_combined_protein.tsv
B3_D_DDA_Vanq_ex_R4.raw	Round_robin_experiment	PYE3_B	D	DDA	Vanq_ex	4	MaxQuant;FragPipe		D3_Vanq_ex_evidence.txt	D3_Vanq_ex_peptides.txt	D3_Vanq_ex_proteinGroups.txt	D3_Vanq_ex_fragpipe_combined_ion.tsv	D3_Vanq_ex_fragpipe_combined_peptide.tsv	D3_Vanq_ex_fragpipe_combined_protein.tsv
B3_D_DDA_Vanq_ex_R5.raw	Round_robin_experiment	PYE3_B	D	DDA	Vanq_ex	5	MaxQuant;FragPipe		D3_Vanq_ex_evidence.txt	D3_Vanq_ex_peptides.txt	D3_Vanq_ex_proteinGroups.txt	D3_Vanq_ex_fragpipe_combined_ion.tsv	D3_Vanq_ex_fragpipe_combined_peptide.tsv	D3_Vanq_ex_fragpipe_combined_protein.tsv
B3_D_DDA_ulti_ecl_R1.raw	Round_robin_experiment	PYE3_B	D	DDA	ulti_ecl	1	MaxQuant;FragPipe		D3_ulti_ecl_evidence.txt	D3_ulti_ecl_peptides.txt	D3_ulti_ecl_proteinGroups.txt	D3_ulti_ecl_fragpipe_combined_ion.tsv	D3_ulti_ecl_fragpipe_combined_peptide.tsv	D3_ulti_ecl_fragpipe_combined_protein.tsv
B3_D_DDA_ulti_ecl_R2.raw	Round_robin_experiment	PYE3_B	D	DDA	ulti_ecl	2	MaxQuant;FragPipe		D3_ulti_ecl_evidence.txt	D3_ulti_ecl_peptides.txt	D3_ulti_ecl_proteinGroups.txt	D3_ulti_ecl_fragpipe_combined_ion.tsv	D3_ulti_ecl_fragpipe_combined_peptide.tsv	D3_ulti_ecl_fragpipe_combined_protein.tsv
B3_D_DDA_ulti_ecl_R3.raw	Round_robin_experiment	PYE3_B	D	DDA	ulti_ecl	3	MaxQuant;FragPipe		D3_ulti_ecl_evidence.txt	D3_ulti_ecl_peptides.txt	D3_ulti_ecl_proteinGroups.txt	D3_ulti_ecl_fragpipe_combined_ion.tsv	D3_ulti_ecl_fragpipe_combined_peptide.tsv	D3_ulti_ecl_fragpipe_combined_protein.tsv
B3_D_DDA_ulti_ecl_R4.raw	Round_robin_experiment	PYE3_B	D	DDA	ulti_ecl	4	MaxQuant;FragPipe		D3_ulti_ecl_evidence.txt	D3_ulti_ecl_peptides.txt	D3_ulti_ecl_proteinGroups.txt	D3_ulti_ecl_fragpipe_combined_ion.tsv	D3_ulti_ecl_fragpipe_combined_peptide.tsv	D3_ulti_ecl_fragpipe_combined_protein.tsv
B3_D_DDA_ulti_ecl_R5.raw	Round_robin_experiment	PYE3_B	D	DDA	ulti_ecl	5	MaxQuant;FragPipe		D3_ulti_ecl_evidence.txt	D3_ulti_ecl_peptides.txt	D3_ulti_ecl_proteinGroups.txt	D3_ulti_ecl_fragpipe_combined_ion.tsv	D3_ulti_ecl_fragpipe_combined_peptide.tsv	D3_ulti_ecl_fragpipe_combined_protein.tsv
B3_D_DDA_ulti_ecl_R6.raw	Round_robin_experiment	PYE3_B	D	DDA	ulti_ecl	6	MaxQuant;FragPipe		D3_ulti_ecl_evidence.txt	D3_ulti_ecl_peptides.txt	D3_ulti_ecl_proteinGroups.txt	D3_ulti_ecl_fragpipe_combined_ion.tsv	D3_ulti_ecl_fragpipe_combined_peptide.tsv	D3_ulti_ecl_fragpipe_combined_protein.tsv
B3_D_DIA_Vanq_ex_R1.raw	Round_robin_experiment	PYE3_B	D	DIA	Vanq_ex	1	DIANN;FragPipe	D3_Vanq_ex_report.tsv							D3_Vanq_ex_fragpipe_report.tsv
B3_D_DIA_Vanq_ex_R2.raw	Round_robin_experiment	PYE3_B	D	DIA	Vanq_ex	2	DIANN;FragPipe	D3_Vanq_ex_report.tsv							D3_Vanq_ex_fragpipe_report.tsv
B3_D_DIA_Vanq_ex_R3.raw	Round_robin_experiment	PYE3_B	D	DIA	Vanq_ex	3	DIANN;FragPipe	D3_Vanq_ex_report.tsv							D3_Vanq_ex_fragpipe_report.tsv
B3_D_DIA_Vanq_ex_R4.raw	Round_robin_experiment	PYE3_B	D	DIA	Vanq_ex	4	DIANN;FragPipe	D3_Vanq_ex_report.tsv							D3_Vanq_ex_fragpipe_report.tsv
B3_D_DIA_Vanq_ex_R5.raw	Round_robin_experiment	PYE3_B	D	DIA	Vanq_ex	5	DIANN;FragPipe	D3_Vanq_ex_report.tsv							D3_Vanq_ex_fragpipe_report.tsv
B3_D_DIA_Vanq_ex_R6.raw	Round_robin_experiment	PYE3_B	D	DIA	Vanq_ex	6	DIANN;FragPipe	D3_Vanq_ex_report.tsv							D3_Vanq_ex_fragpipe_report.tsv
B3_D_DIA_ulti_ecl_R1.raw	Round_robin_experiment	PYE3_B	D	DIA	ulti_ecl	1	DIANN;FragPipe	D3_ulti_ecl_report.tsv							D3_ulti_ecl_fragpipe_report.tsv
B3_D_DIA_ulti_ecl_R2.raw	Round_robin_experiment	PYE3_B	D	DIA	ulti_ecl	2	DIANN;FragPipe	D3_ulti_ecl_report.tsv							D3_ulti_ecl_fragpipe_report.tsv
B3_D_DIA_ulti_ecl_R3.raw	Round_robin_experiment	PYE3_B	D	DIA	ulti_ecl	3	DIANN;FragPipe	D3_ulti_ecl_report.tsv							D3_ulti_ecl_fragpipe_report.tsv
B3_D_DIA_ulti_ecl_R4.raw	Round_robin_experiment	PYE3_B	D	DIA	ulti_ecl	4	DIANN;FragPipe	D3_ulti_ecl_report.tsv							D3_ulti_ecl_fragpipe_report.tsv
B3_D_DIA_ulti_ecl_R5.raw	Round_robin_experiment	PYE3_B	D	DIA	ulti_ecl	5	DIANN;FragPipe	D3_ulti_ecl_report.tsv							D3_ulti_ecl_fragpipe_report.tsv
B3_D_DIA_ulti_ecl_R6.raw	Round_robin_experiment	PYE3_B	D	DIA	ulti_ecl	6	DIANN;FragPipe	D3_ulti_ecl_report.tsv							D3_ulti_ecl_fragpipe_report.tsv
B3_E_DDA_Vanq_ex_R1.raw	Round_robin_experiment	PYE3_B	E	DDA	Vanq_ex	1	MaxQuant;FragPipe		E3_Vanq_ex_evidence.txt	E3_Vanq_ex_peptides.txt	E3_Vanq_ex_proteinGroups.txt	E3_Vanq_ex_fragpipe_combined_ion.tsv	E3_Vanq_ex_fragpipe_combined_peptide.tsv	E3_Vanq_ex_fragpipe_combined_protein.tsv
B3_E_DDA_Vanq_ex_R2.raw	Round_robin_experiment	PYE3_B	E	DDA	Vanq_ex	2	MaxQuant;FragPipe		E3_Vanq_ex_evidence.txt	E3_Vanq_ex_peptides.txt	E3_Vanq_ex_proteinGroups.txt	E3_Vanq_ex_fragpipe_combined_ion.tsv	E3_Vanq_ex_fragpipe_combined_peptide.tsv	E3_Vanq_ex_fragpipe_combined_protein.tsv
B3_E_DDA_Vanq_ex_R3.raw	Round_robin_experiment	PYE3_B	E	DDA	Vanq_ex	3	MaxQuant;FragPipe		E3_Vanq_ex_evidence.txt	E3_Vanq_ex_peptides.txt	E3_Vanq_ex_proteinGroups.txt	E3_Vanq_ex_fragpipe_combined_ion.tsv	E3_Vanq_ex_fragpipe_combined_peptide.tsv	E3_Vanq_ex_fragpipe_combined_protein.tsv
B3_E_DDA_Vanq_ex_R4.raw	Round_robin_experiment	PYE3_B	E	DDA	Vanq_ex	4	MaxQuant;FragPipe		E3_Vanq_ex_evidence.txt	E3_Vanq_ex_peptides.txt	E3_Vanq_ex_proteinGroups.txt	E3_Vanq_ex_fragpipe_combined_ion.tsv	E3_Vanq_ex_fragpipe_combined_peptide.tsv	E3_Vanq_ex_fragpipe_combined_protein.tsv
B3_E_DDA_Vanq_ex_R5.raw	Round_robin_experiment	PYE3_B	E	DDA	Vanq_ex	5	MaxQuant;FragPipe		E3_Vanq_ex_evidence.txt	E3_Vanq_ex_peptides.txt	E3_Vanq_ex_proteinGroups.txt	E3_Vanq_ex_fragpipe_combined_ion.tsv	E3_Vanq_ex_fragpipe_combined_peptide.tsv	E3_Vanq_ex_fragpipe_combined_protein.tsv
B3_E_DDA_ulti_lumos_R1.raw	Round_robin_experiment	PYE3_B	E	DDA	ulti_lumos	1	MaxQuant;FragPipe		E3_ulti_lumos_evidence.txt	E3_ulti_lumos_peptides.txt	E3_ulti_lumos_proteinGroups.txt	E3_ulti_lumos_fragpipe_combined_ion.tsv	E3_ulti_lumos_fragpipe_combined_peptide.tsv	E3_ulti_lumos_fragpipe_combined_protein.tsv
B3_E_DDA_ulti_lumos_R2.raw	Round_robin_experiment	PYE3_B	E	DDA	ulti_lumos	2	MaxQuant;FragPipe		E3_ulti_lumos_evidence.txt	E3_ulti_lumos_peptides.txt	E3_ulti_lumos_proteinGroups.txt	E3_ulti_lumos_fragpipe_combined_ion.tsv	E3_ulti_lumos_fragpipe_combined_peptide.tsv	E3_ulti_lumos_fragpipe_combined_protein.tsv
B3_E_DDA_ulti_lumos_R3.raw	Round_robin_experiment	PYE3_B	E	DDA	ulti_lumos	3	MaxQuant;FragPipe		E3_ulti_lumos_evidence.txt	E3_ulti_lumos_peptides.txt	E3_ulti_lumos_proteinGroups.txt	E3_ulti_lumos_fragpipe_combined_ion.tsv	E3_ulti_lumos_fragpipe_combined_peptide.tsv	E3_ulti_lumos_fragpipe_combined_protein.tsv
B3_E_DDA_ulti_lumos_R4.raw	Round_robin_experiment	PYE3_B	E	DDA	ulti_lumos	4	MaxQuant;FragPipe		E3_ulti_lumos_evidence.txt	E3_ulti_lumos_peptides.txt	E3_ulti_lumos_proteinGroups.txt	E3_ulti_lumos_fragpipe_combined_ion.tsv	E3_ulti_lumos_fragpipe_combined_peptide.tsv	E3_ulti_lumos_fragpipe_combined_protein.tsv
B3_E_DDA_ulti_lumos_R5.raw	Round_robin_experiment	PYE3_B	E	DDA	ulti_lumos	5	MaxQuant;FragPipe		E3_ulti_lumos_evidence.txt	E3_ulti_lumos_peptides.txt	E3_ulti_lumos_proteinGroups.txt	E3_ulti_lumos_fragpipe_combined_ion.tsv	E3_ulti_lumos_fragpipe_combined_peptide.tsv	E3_ulti_lumos_fragpipe_combined_protein.tsv
B3_E_DDA_ulti_lumos_R6.raw	Round_robin_experiment	PYE3_B	E	DDA	ulti_lumos	6	MaxQuant;FragPipe		E3_ulti_lumos_evidence.txt	E3_ulti_lumos_peptides.txt	E3_ulti_lumos_proteinGroups.txt	E3_ulti_lumos_fragpipe_combined_ion.tsv	E3_ulti_lumos_fragpipe_combined_peptide.tsv	E3_ulti_lumos_fragpipe_combined_protein.tsv
B3_E_DIA_Vanq_ex_R1.raw	Round_robin_experiment	PYE3_B	E	DIA	Vanq_ex	1	DIANN;FragPipe	E3_Vanq_ex_report.tsv							E3_Vanq_ex_fragpipe_report.tsv
B3_E_DIA_Vanq_ex_R2.raw	Round_robin_experiment	PYE3_B	E	DIA	Vanq_ex	2	DIANN;FragPipe	E3_Vanq_ex_report.tsv							E3_Vanq_ex_fragpipe_report.tsv
B3_E_DIA_Vanq_ex_R3.raw	Round_robin_experiment	PYE3_B	E	DIA	Vanq_ex	3	DIANN;FragPipe	E3_Vanq_ex_report.tsv							E3_Vanq_ex_fragpipe_report.tsv
B3_E_DIA_Vanq_ex_R4.raw	Round_robin_experiment	PYE3_B	E	DIA	Vanq_ex	4	DIANN;FragPipe	E3_Vanq_ex_report.tsv							E3_Vanq_ex_fragpipe_report.tsv
B3_E_DIA_Vanq_ex_R5.raw	Round_robin_experiment	PYE3_B	E	DIA	Vanq_ex	5	DIANN;FragPipe	E3_Vanq_ex_report.tsv							E3_Vanq_ex_fragpipe_report.tsv
B3_E_DIA_ulti_lumos_R1.raw	Round_robin_experiment	PYE3_B	E	DIA	ulti_lumos	1	DIANN;FragPipe	E3_ulti_lumos_report.tsv							E3_ulti_lumos_fragpipe_report.tsv
B3_E_DIA_ulti_lumos_R2.raw	Round_robin_experiment	PYE3_B	E	DIA	ulti_lumos	2	DIANN;FragPipe	E3_ulti_lumos_report.tsv							E3_ulti_lumos_fragpipe_report.tsv
B3_E_DIA_ulti_lumos_R3.raw	Round_robin_experiment	PYE3_B	E	DIA	ulti_lumos	3	DIANN;FragPipe	E3_ulti_lumos_report.tsv							E3_ulti_lumos_fragpipe_report.tsv
B3_E_DIA_ulti_lumos_R4.raw	Round_robin_experiment	PYE3_B	E	DIA	ulti_lumos	4	DIANN;FragPipe	E3_ulti_lumos_report.tsv							E3_ulti_lumos_fragpipe_report.tsv
B3_E_DIA_ulti_lumos_R5.raw	Round_robin_experiment	PYE3_B	E	DIA	ulti_lumos	5	DIANN;FragPipe	E3_ulti_lumos_report.tsv							E3_ulti_lumos_fragpipe_report.tsv
B3_E_DIA_ulti_lumos_R6.raw	Round_robin_experiment	PYE3_B	E	DIA	ulti_lumos	6	DIANN;FragPipe	E3_ulti_lumos_report.tsv							E3_ulti_lumos_fragpipe_report.tsv
B3_F_DDA_Vanq_ecl_R1.raw	Round_robin_experiment	PYE3_B	F	DDA	Vanq_ecl	1	MaxQuant;FragPipe		F3_Vanq_ecl_evidence.txt	F3_Vanq_ecl_peptides.txt	F3_Vanq_ecl_proteinGroups.txt	F3_Vanq_ecl_fragpipe_combined_ion.tsv	F3_Vanq_ecl_fragpipe_combined_peptide.tsv	F3_Vanq_ecl_fragpipe_combined_protein.tsv
B3_F_DDA_Vanq_ecl_R2.raw	Round_robin_experiment	PYE3_B	F	DDA	Vanq_ecl	2	MaxQuant;FragPipe		F3_Vanq_ecl_evidence.txt	F3_Vanq_ecl_peptides.txt	F3_Vanq_ecl_proteinGroups.txt	F3_Vanq_ecl_fragpipe_combined_ion.tsv	F3_Vanq_ecl_fragpipe_combined_peptide.tsv	F3_Vanq_ecl_fragpipe_combined_protein.tsv
B3_F_DDA_Vanq_ecl_R3.raw	Round_robin_experiment	PYE3_B	F	DDA	Vanq_ecl	3	MaxQuant;FragPipe		F3_Vanq_ecl_evidence.txt	F3_Vanq_ecl_peptides.txt	F3_Vanq_ecl_proteinGroups.txt	F3_Vanq_ecl_fragpipe_combined_ion.tsv	F3_Vanq_ecl_fragpipe_combined_peptide.tsv	F3_Vanq_ecl_fragpipe_combined_protein.tsv
B3_F_DDA_Vanq_ecl_R4.raw	Round_robin_experiment	PYE3_B	F	DDA	Vanq_ecl	4	MaxQuant;FragPipe		F3_Vanq_ecl_evidence.txt	F3_Vanq_ecl_peptides.txt	F3_Vanq_ecl_proteinGroups.txt	F3_Vanq_ecl_fragpipe_combined_ion.tsv	F3_Vanq_ecl_fragpipe_combined_peptide.tsv	F3_Vanq_ecl_fragpipe_combined_protein.tsv
B3_F_DDA_Vanq_ecl_R5.raw	Round_robin_experiment	PYE3_B	F	DDA	Vanq_ecl	5	MaxQuant;FragPipe		F3_Vanq_ecl_evidence.txt	F3_Vanq_ecl_peptides.txt	F3_Vanq_ecl_proteinGroups.txt	F3_Vanq_ecl_fragpipe_combined_ion.tsv	F3_Vanq_ecl_fragpipe_combined_peptide.tsv	F3_Vanq_ecl_fragpipe_combined_protein.tsv
B3_F_DDA_Vanq_ecl_R6.raw	Round_robin_experiment	PYE3_B	F	DDA	Vanq_ecl	6	MaxQuant;FragPipe		F3_Vanq_ecl_evidence.txt	F3_Vanq_ecl_peptides.txt	F3_Vanq_ecl_proteinGroups.txt	F3_Vanq_ecl_fragpipe_combined_ion.tsv	F3_Vanq_ecl_fragpipe_combined_peptide.tsv	F3_Vanq_ecl_fragpipe_combined_protein.tsv
B3_G_DDA_ulti_ex_R1.raw	Round_robin_experiment	PYE3_B	G	DDA	ulti_ex	1	MaxQuant;FragPipe		G3_ulti_ex_evidence.txt	G3_ulti_ex_peptides.txt	G3_ulti_ex_proteinGroups.txt	G3_ulti_ex_fragpipe_combined_ion.tsv	G3_ulti_ex_fragpipe_combined_peptide.tsv	G3_ulti_ex_fragpipe_combined_protein.tsv
B3_G_DDA_ulti_ex_R2.raw	Round_robin_experiment	PYE3_B	G	DDA	ulti_ex	2	MaxQuant;FragPipe		G3_ulti_ex_evidence.txt	G3_ulti_ex_peptides.txt	G3_ulti_ex_proteinGroups.txt	G3_ulti_ex_fragpipe_combined_ion.tsv	G3_ulti_ex_fragpipe_combined_peptide.tsv	G3_ulti_ex_fragpipe_combined_protein.tsv
B3_G_DDA_ulti_ex_R3.raw	Round_robin_experiment	PYE3_B	G	DDA	ulti_ex	3	MaxQuant;FragPipe		G3_ulti_ex_evidence.txt	G3_ulti_ex_peptides.txt	G3_ulti_ex_proteinGroups.txt	G3_ulti_ex_fragpipe_combined_ion.tsv	G3_ulti_ex_fragpipe_combined_peptide.tsv	G3_ulti_ex_fragpipe_combined_protein.tsv
B3_G_DDA_ulti_ex_R4.raw	Round_robin_experiment	PYE3_B	G	DDA	ulti_ex	4	MaxQuant;FragPipe		G3_ulti_ex_evidence.txt	G3_ulti_ex_peptides.txt	G3_ulti_ex_proteinGroups.txt	G3_ulti_ex_fragpipe_combined_ion.tsv	G3_ulti_ex_fragpipe_combined_peptide.tsv	G3_ulti_ex_fragpipe_combined_protein.tsv
B3_G_DDA_ulti_ex_R5.raw	Round_robin_experiment	PYE3_B	G	DDA	ulti_ex	5	MaxQuant;FragPipe		G3_ulti_ex_evidence.txt	G3_ulti_ex_peptides.txt	G3_ulti_ex_proteinGroups.txt	G3_ulti_ex_fragpipe_combined_ion.tsv	G3_ulti_ex_fragpipe_combined_peptide.tsv	G3_ulti_ex_fragpipe_combined_protein.tsv
B3_G_DDA_ulti_ex_R6.raw	Round_robin_experiment	PYE3_B	G	DDA	ulti_ex	6	MaxQuant;FragPipe		G3_ulti_ex_evidence.txt	G3_ulti_ex_peptides.txt	G3_ulti_ex_proteinGroups.txt	G3_ulti_ex_fragpipe_combined_ion.tsv	G3_ulti_ex_fragpipe_combined_peptide.tsv	G3_ulti_ex_fragpipe_combined_protein.tsv
B3_G_DIA_ulti_ex_R1.raw	Round_robin_experiment	PYE3_B	G	DIA	ulti_ex	1	DIANN;FragPipe	G3_ulti_ex_report.tsv							G3_ulti_ex_fragpipe_report.tsv
B3_G_DIA_ulti_ex_R2.raw	Round_robin_experiment	PYE3_B	G	DIA	ulti_ex	2	DIANN;FragPipe	G3_ulti_ex_report.tsv							G3_ulti_ex_fragpipe_report.tsv
B3_G_DIA_ulti_ex_R3.raw	Round_robin_experiment	PYE3_B	G	DIA	ulti_ex	3	DIANN;FragPipe	G3_ulti_ex_report.tsv							G3_ulti_ex_fragpipe_report.tsv
B3_G_DIA_ulti_ex_R4.raw	Round_robin_experiment	PYE3_B	G	DIA	ulti_ex	4	DIANN;FragPipe	G3_ulti_ex_report.tsv							G3_ulti_ex_fragpipe_report.tsv
B3_G_DIA_ulti_ex_R5.raw	Round_robin_experiment	PYE3_B	G	DIA	ulti_ex	5	DIANN;FragPipe	G3_ulti_ex_report.tsv							G3_ulti_ex_fragpipe_report.tsv
B3_G_DIA_ulti_ex_R6.raw	Round_robin_experiment	PYE3_B	G	DIA	ulti_ex	6	DIANN;FragPipe	G3_ulti_ex_report.tsv							G3_ulti_ex_fragpipe_report.tsv
B3_K_DIA_Mclass_zTOF_R1.wiff	Round_robin_experiment	PYE3_B	K	DIA	Mclass_zTOF	1	DIANN;FragPipe	K3_Mclass_zTOF_report.tsv							K3_Mclass_zTOF_fragpipe_report.tsv
B3_K_DIA_Mclass_zTOF_R1.wiff.scan	Round_robin_experiment	PYE3_B	K	DIA	Mclass_zTOF	1	DIANN;FragPipe	K3_Mclass_zTOF_report.tsv							K3_Mclass_zTOF_fragpipe_report.tsv
B3_K_DIA_Mclass_zTOF_R2.wiff	Round_robin_experiment	PYE3_B	K	DIA	Mclass_zTOF	2	DIANN;FragPipe	K3_Mclass_zTOF_report.tsv							K3_Mclass_zTOF_fragpipe_report.tsv
B3_K_DIA_Mclass_zTOF_R2.wiff.scan	Round_robin_experiment	PYE3_B	K	DIA	Mclass_zTOF	2	DIANN;FragPipe	K3_Mclass_zTOF_report.tsv							K3_Mclass_zTOF_fragpipe_report.tsv
B3_K_DIA_Mclass_zTOF_R3.wiff	Round_robin_experiment	PYE3_B	K	DIA	Mclass_zTOF	3	DIANN;FragPipe	K3_Mclass_zTOF_report.tsv							K3_Mclass_zTOF_fragpipe_report.tsv
B3_K_DIA_Mclass_zTOF_R3.wiff.scan	Round_robin_experiment	PYE3_B	K	DIA	Mclass_zTOF	3	DIANN;FragPipe	K3_Mclass_zTOF_report.tsv							K3_Mclass_zTOF_fragpipe_report.tsv
B3_K_DIA_Mclass_zTOF_R4.wiff	Round_robin_experiment	PYE3_B	K	DIA	Mclass_zTOF	4	DIANN;FragPipe	K3_Mclass_zTOF_report.tsv							K3_Mclass_zTOF_fragpipe_report.tsv
B3_K_DIA_Mclass_zTOF_R4.wiff.scan	Round_robin_experiment	PYE3_B	K	DIA	Mclass_zTOF	4	DIANN;FragPipe	K3_Mclass_zTOF_report.tsv							K3_Mclass_zTOF_fragpipe_report.tsv
B3_K_DIA_Mclass_zTOF_R5.wiff	Round_robin_experiment	PYE3_B	K	DIA	Mclass_zTOF	5	DIANN;FragPipe	K3_Mclass_zTOF_report.tsv							K3_Mclass_zTOF_fragpipe_report.tsv
B3_K_DIA_Mclass_zTOF_R5.wiff.scan	Round_robin_experiment	PYE3_B	K	DIA	Mclass_zTOF	5	DIANN;FragPipe	K3_Mclass_zTOF_report.tsv							K3_Mclass_zTOF_fragpipe_report.tsv
B3_K_DIA_Mclass_zTOF_R6.wiff	Round_robin_experiment	PYE3_B	K	DIA	Mclass_zTOF	6	DIANN;FragPipe	K3_Mclass_zTOF_report.tsv							K3_Mclass_zTOF_fragpipe_report.tsv
B3_K_DIA_Mclass_zTOF_R6.wiff.scan	Round_robin_experiment	PYE3_B	K	DIA	Mclass_zTOF	6	DIANN;FragPipe	K3_Mclass_zTOF_report.tsv							K3_Mclass_zTOF_fragpipe_report.tsv
B9_A_DDA_evo_ex_R1.raw	Round_robin_experiment	PYE9_B	A	DDA	evo_ex	1	MaxQuant;FragPipe		A9_evo_ex_evidence.txt	A9_evo_ex_peptides.txt	A9_evo_ex_proteinGroups.txt	A9_evo_ex_fragpipe_combined_ion.tsv	A9_evo_ex_fragpipe_combined_peptide.tsv	A9_evo_ex_fragpipe_combined_protein.tsv
B9_A_DDA_evo_ex_R2.raw	Round_robin_experiment	PYE9_B	A	DDA	evo_ex	2	MaxQuant;FragPipe		A9_evo_ex_evidence.txt	A9_evo_ex_peptides.txt	A9_evo_ex_proteinGroups.txt	A9_evo_ex_fragpipe_combined_ion.tsv	A9_evo_ex_fragpipe_combined_peptide.tsv	A9_evo_ex_fragpipe_combined_protein.tsv
B9_A_DDA_evo_ex_R3.raw	Round_robin_experiment	PYE9_B	A	DDA	evo_ex	3	MaxQuant;FragPipe		A9_evo_ex_evidence.txt	A9_evo_ex_peptides.txt	A9_evo_ex_proteinGroups.txt	A9_evo_ex_fragpipe_combined_ion.tsv	A9_evo_ex_fragpipe_combined_peptide.tsv	A9_evo_ex_fragpipe_combined_protein.tsv
B9_A_DDA_evo_ex_R4.raw	Round_robin_experiment	PYE9_B	A	DDA	evo_ex	4	MaxQuant;FragPipe		A9_evo_ex_evidence.txt	A9_evo_ex_peptides.txt	A9_evo_ex_proteinGroups.txt	A9_evo_ex_fragpipe_combined_ion.tsv	A9_evo_ex_fragpipe_combined_peptide.tsv	A9_evo_ex_fragpipe_combined_protein.tsv
B9_A_DDA_evo_ex_R5.raw	Round_robin_experiment	PYE9_B	A	DDA	evo_ex	5	MaxQuant;FragPipe		A9_evo_ex_evidence.txt	A9_evo_ex_peptides.txt	A9_evo_ex_proteinGroups.txt	A9_evo_ex_fragpipe_combined_ion.tsv	A9_evo_ex_fragpipe_combined_peptide.tsv	A9_evo_ex_fragpipe_combined_protein.tsv
B9_A_DDA_evo_ex_R6.raw	Round_robin_experiment	PYE9_B	A	DDA	evo_ex	6	MaxQuant;FragPipe		A9_evo_ex_evidence.txt	A9_evo_ex_peptides.txt	A9_evo_ex_proteinGroups.txt	A9_evo_ex_fragpipe_combined_ion.tsv	A9_evo_ex_fragpipe_combined_peptide.tsv	A9_evo_ex_fragpipe_combined_protein.tsv
B9_A_DDA_ulti_ex_R1.raw	Round_robin_experiment	PYE9_B	A	DDA	ulti_ex	1	MaxQuant;FragPipe		A9_ulti_ex_evidence.txt	A9_ulti_ex_peptides.txt	A9_ulti_ex_proteinGroups.txt	A9_ulti_ex_fragpipe_combined_ion.tsv	A9_ulti_ex_fragpipe_combined_peptide.tsv	A9_ulti_ex_fragpipe_combined_protein.tsv
B9_A_DDA_ulti_ex_R2.raw	Round_robin_experiment	PYE9_B	A	DDA	ulti_ex	2	MaxQuant;FragPipe		A9_ulti_ex_evidence.txt	A9_ulti_ex_peptides.txt	A9_ulti_ex_proteinGroups.txt	A9_ulti_ex_fragpipe_combined_ion.tsv	A9_ulti_ex_fragpipe_combined_peptide.tsv	A9_ulti_ex_fragpipe_combined_protein.tsv
B9_A_DDA_ulti_ex_R3.raw	Round_robin_experiment	PYE9_B	A	DDA	ulti_ex	3	MaxQuant;FragPipe		A9_ulti_ex_evidence.txt	A9_ulti_ex_peptides.txt	A9_ulti_ex_proteinGroups.txt	A9_ulti_ex_fragpipe_combined_ion.tsv	A9_ulti_ex_fragpipe_combined_peptide.tsv	A9_ulti_ex_fragpipe_combined_protein.tsv
B9_A_DDA_ulti_ex_R4.raw	Round_robin_experiment	PYE9_B	A	DDA	ulti_ex	4	MaxQuant;FragPipe		A9_ulti_ex_evidence.txt	A9_ulti_ex_peptides.txt	A9_ulti_ex_proteinGroups.txt	A9_ulti_ex_fragpipe_combined_ion.tsv	A9_ulti_ex_fragpipe_combined_peptide.tsv	A9_ulti_ex_fragpipe_combined_protein.tsv
B9_A_DDA_ulti_ex_R5.raw	Round_robin_experiment	PYE9_B	A	DDA	ulti_ex	5	MaxQuant;FragPipe		A9_ulti_ex_evidence.txt	A9_ulti_ex_peptides.txt	A9_ulti_ex_proteinGroups.txt	A9_ulti_ex_fragpipe_combined_ion.tsv	A9_ulti_ex_fragpipe_combined_peptide.tsv	A9_ulti_ex_fragpipe_combined_protein.tsv
B9_A_DDA_ulti_ex_R6.raw	Round_robin_experiment	PYE9_B	A	DDA	ulti_ex	6	MaxQuant;FragPipe		A9_ulti_ex_evidence.txt	A9_ulti_ex_peptides.txt	A9_ulti_ex_proteinGroups.txt	A9_ulti_ex_fragpipe_combined_ion.tsv	A9_ulti_ex_fragpipe_combined_peptide.tsv	A9_ulti_ex_fragpipe_combined_protein.tsv
B9_A_DIA_evo_ex_R1.raw	Round_robin_experiment	PYE9_B	A	DIA	evo_ex	1	DIANN;FragPipe	A9_evo_ex_report.tsv							A9_evo_ex_fragpipe_report.tsv
B9_A_DIA_evo_ex_R2.raw	Round_robin_experiment	PYE9_B	A	DIA	evo_ex	2	DIANN;FragPipe	A9_evo_ex_report.tsv							A9_evo_ex_fragpipe_report.tsv
B9_A_DIA_evo_ex_R3.raw	Round_robin_experiment	PYE9_B	A	DIA	evo_ex	3	DIANN;FragPipe	A9_evo_ex_report.tsv							A9_evo_ex_fragpipe_report.tsv
B9_A_DIA_evo_ex_R4.raw	Round_robin_experiment	PYE9_B	A	DIA	evo_ex	4	DIANN;FragPipe	A9_evo_ex_report.tsv							A9_evo_ex_fragpipe_report.tsv
B9_A_DIA_evo_ex_R5.raw	Round_robin_experiment	PYE9_B	A	DIA	evo_ex	5	DIANN;FragPipe	A9_evo_ex_report.tsv							A9_evo_ex_fragpipe_report.tsv
B9_A_DIA_evo_ex_R6.raw	Round_robin_experiment	PYE9_B	A	DIA	evo_ex	6	DIANN;FragPipe	A9_evo_ex_report.tsv							A9_evo_ex_fragpipe_report.tsv
B9_A_DIA_ulti_ex_R1.raw	Round_robin_experiment	PYE9_B	A	DIA	ulti_ex	1	DIANN;FragPipe	A9_ulti_ex_report.tsv							A9_ulti_ex_fragpipe_report.tsv
B9_A_DIA_ulti_ex_R2.raw	Round_robin_experiment	PYE9_B	A	DIA	ulti_ex	2	DIANN;FragPipe	A9_ulti_ex_report.tsv							A9_ulti_ex_fragpipe_report.tsv
B9_A_DIA_ulti_ex_R3.raw	Round_robin_experiment	PYE9_B	A	DIA	ulti_ex	3	DIANN;FragPipe	A9_ulti_ex_report.tsv							A9_ulti_ex_fragpipe_report.tsv
B9_A_DIA_ulti_ex_R4.raw	Round_robin_experiment	PYE9_B	A	DIA	ulti_ex	4	DIANN;FragPipe	A9_ulti_ex_report.tsv							A9_ulti_ex_fragpipe_report.tsv
B9_A_DIA_ulti_ex_R5.raw	Round_robin_experiment	PYE9_B	A	DIA	ulti_ex	5	DIANN;FragPipe	A9_ulti_ex_report.tsv							A9_ulti_ex_fragpipe_report.tsv
B9_A_DIA_ulti_ex_R6.raw	Round_robin_experiment	PYE9_B	A	DIA	ulti_ex	6	DIANN;FragPipe	A9_ulti_ex_report.tsv							A9_ulti_ex_fragpipe_report.tsv
B9_B_DDA_ulti_HF_R1.raw	Round_robin_experiment	PYE9_B	B	DDA	ulti_HF	1	MaxQuant;FragPipe		B9_ulti_HF_evidence.txt	B9_ulti_HF_peptides.txt	B9_ulti_HF_proteinGroups.txt	B9_ulti_HF_fragpipe_combined_ion.tsv	B9_ulti_HF_fragpipe_combined_peptide.tsv	B9_ulti_HF_fragpipe_combined_protein.tsv
B9_B_DDA_ulti_HF_R2.raw	Round_robin_experiment	PYE9_B	B	DDA	ulti_HF	2	MaxQuant;FragPipe		B9_ulti_HF_evidence.txt	B9_ulti_HF_peptides.txt	B9_ulti_HF_proteinGroups.txt	B9_ulti_HF_fragpipe_combined_ion.tsv	B9_ulti_HF_fragpipe_combined_peptide.tsv	B9_ulti_HF_fragpipe_combined_protein.tsv
B9_B_DDA_ulti_HF_R3.raw	Round_robin_experiment	PYE9_B	B	DDA	ulti_HF	3	MaxQuant;FragPipe		B9_ulti_HF_evidence.txt	B9_ulti_HF_peptides.txt	B9_ulti_HF_proteinGroups.txt	B9_ulti_HF_fragpipe_combined_ion.tsv	B9_ulti_HF_fragpipe_combined_peptide.tsv	B9_ulti_HF_fragpipe_combined_protein.tsv
B9_B_DDA_ulti_HF_R4.raw	Round_robin_experiment	PYE9_B	B	DDA	ulti_HF	4	MaxQuant;FragPipe		B9_ulti_HF_evidence.txt	B9_ulti_HF_peptides.txt	B9_ulti_HF_proteinGroups.txt	B9_ulti_HF_fragpipe_combined_ion.tsv	B9_ulti_HF_fragpipe_combined_peptide.tsv	B9_ulti_HF_fragpipe_combined_protein.tsv
B9_B_DDA_ulti_HF_R5.raw	Round_robin_experiment	PYE9_B	B	DDA	ulti_HF	5	MaxQuant;FragPipe		B9_ulti_HF_evidence.txt	B9_ulti_HF_peptides.txt	B9_ulti_HF_proteinGroups.txt	B9_ulti_HF_fragpipe_combined_ion.tsv	B9_ulti_HF_fragpipe_combined_peptide.tsv	B9_ulti_HF_fragpipe_combined_protein.tsv
B9_B_DDA_ulti_HF_R6.raw	Round_robin_experiment	PYE9_B	B	DDA	ulti_HF	6	MaxQuant;FragPipe		B9_ulti_HF_evidence.txt	B9_ulti_HF_peptides.txt	B9_ulti_HF_proteinGroups.txt	B9_ulti_HF_fragpipe_combined_ion.tsv	B9_ulti_HF_fragpipe_combined_peptide.tsv	B9_ulti_HF_fragpipe_combined_protein.tsv
B9_B_DDA_ulti_HFX_R1.raw	Round_robin_experiment	PYE9_B	B	DDA	ulti_HFX	1	MaxQuant;FragPipe		B9_ulti_HFX_evidence.txt	B9_ulti_HFX_peptides.txt	B9_ulti_HFX_proteinGroups.txt	B9_ulti_HFX_fragpipe_combined_ion.tsv	B9_ulti_HFX_fragpipe_combined_peptide.tsv	B9_ulti_HFX_fragpipe_combined_protein.tsv
B9_B_DDA_ulti_HFX_R2.raw	Round_robin_experiment	PYE9_B	B	DDA	ulti_HFX	2	MaxQuant;FragPipe		B9_ulti_HFX_evidence.txt	B9_ulti_HFX_peptides.txt	B9_ulti_HFX_proteinGroups.txt	B9_ulti_HFX_fragpipe_combined_ion.tsv	B9_ulti_HFX_fragpipe_combined_peptide.tsv	B9_ulti_HFX_fragpipe_combined_protein.tsv
B9_B_DDA_ulti_HFX_R3.raw	Round_robin_experiment	PYE9_B	B	DDA	ulti_HFX	3	MaxQuant;FragPipe		B9_ulti_HFX_evidence.txt	B9_ulti_HFX_peptides.txt	B9_ulti_HFX_proteinGroups.txt	B9_ulti_HFX_fragpipe_combined_ion.tsv	B9_ulti_HFX_fragpipe_combined_peptide.tsv	B9_ulti_HFX_fragpipe_combined_protein.tsv
B9_B_DDA_ulti_HFX_R4.raw	Round_robin_experiment	PYE9_B	B	DDA	ulti_HFX	4	MaxQuant;FragPipe		B9_ulti_HFX_evidence.txt	B9_ulti_HFX_peptides.txt	B9_ulti_HFX_proteinGroups.txt	B9_ulti_HFX_fragpipe_combined_ion.tsv	B9_ulti_HFX_fragpipe_combined_peptide.tsv	B9_ulti_HFX_fragpipe_combined_protein.tsv
B9_B_DDA_ulti_HFX_R5.raw	Round_robin_experiment	PYE9_B	B	DDA	ulti_HFX	5	MaxQuant;FragPipe		B9_ulti_HFX_evidence.txt	B9_ulti_HFX_peptides.txt	B9_ulti_HFX_proteinGroups.txt	B9_ulti_HFX_fragpipe_combined_ion.tsv	B9_ulti_HFX_fragpipe_combined_peptide.tsv	B9_ulti_HFX_fragpipe_combined_protein.tsv
B9_B_DDA_ulti_HFX_R6.raw	Round_robin_experiment	PYE9_B	B	DDA	ulti_HFX	6	MaxQuant;FragPipe		B9_ulti_HFX_evidence.txt	B9_ulti_HFX_peptides.txt	B9_ulti_HFX_proteinGroups.txt	B9_ulti_HFX_fragpipe_combined_ion.tsv	B9_ulti_HFX_fragpipe_combined_peptide.tsv	B9_ulti_HFX_fragpipe_combined_protein.tsv
B9_B_DIA_ulti_HF_R1.raw	Round_robin_experiment	PYE9_B	B	DIA	ulti_HF	1	DIANN;FragPipe	B9_ulti_HF_report.tsv							B9_ulti_HF_fragpipe_report.tsv
B9_B_DIA_ulti_HF_R2.raw	Round_robin_experiment	PYE9_B	B	DIA	ulti_HF	2	DIANN;FragPipe	B9_ulti_HF_report.tsv							B9_ulti_HF_fragpipe_report.tsv
B9_B_DIA_ulti_HF_R3.raw	Round_robin_experiment	PYE9_B	B	DIA	ulti_HF	3	DIANN;FragPipe	B9_ulti_HF_report.tsv							B9_ulti_HF_fragpipe_report.tsv
B9_B_DIA_ulti_HF_R4.raw	Round_robin_experiment	PYE9_B	B	DIA	ulti_HF	4	DIANN;FragPipe	B9_ulti_HF_report.tsv							B9_ulti_HF_fragpipe_report.tsv
B9_B_DIA_ulti_HF_R5.raw	Round_robin_experiment	PYE9_B	B	DIA	ulti_HF	5	DIANN;FragPipe	B9_ulti_HF_report.tsv							B9_ulti_HF_fragpipe_report.tsv
B9_B_DIA_ulti_HF_R6.raw	Round_robin_experiment	PYE9_B	B	DIA	ulti_HF	6	DIANN;FragPipe	B9_ulti_HF_report.tsv							B9_ulti_HF_fragpipe_report.tsv
B9_B_DIA_ulti_HFX_R1.raw	Round_robin_experiment	PYE9_B	B	DIA	ulti_HFX	1	DIANN;FragPipe	B9_ulti_HFX_report.tsv							B9_ulti_HFX_fragpipe_report.tsv
B9_B_DIA_ulti_HFX_R2.raw	Round_robin_experiment	PYE9_B	B	DIA	ulti_HFX	2	DIANN;FragPipe	B9_ulti_HFX_report.tsv							B9_ulti_HFX_fragpipe_report.tsv
B9_B_DIA_ulti_HFX_R3.raw	Round_robin_experiment	PYE9_B	B	DIA	ulti_HFX	3	DIANN;FragPipe	B9_ulti_HFX_report.tsv							B9_ulti_HFX_fragpipe_report.tsv
B9_B_DIA_ulti_HFX_R4.raw	Round_robin_experiment	PYE9_B	B	DIA	ulti_HFX	4	DIANN;FragPipe	B9_ulti_HFX_report.tsv							B9_ulti_HFX_fragpipe_report.tsv
B9_B_DIA_ulti_HFX_R5.raw	Round_robin_experiment	PYE9_B	B	DIA	ulti_HFX	5	DIANN;FragPipe	B9_ulti_HFX_report.tsv							B9_ulti_HFX_fragpipe_report.tsv
B9_B_DIA_ulti_HFX_R6.raw	Round_robin_experiment	PYE9_B	B	DIA	ulti_HFX	6	DIANN;FragPipe	B9_ulti_HFX_report.tsv							B9_ulti_HFX_fragpipe_report.tsv
B9_D_DDA_Vanq_ex_R1.raw	Round_robin_experiment	PYE9_B	D	DDA	Vanq_ex	1	MaxQuant;FragPipe		D9_Vanq_ex_evidence.txt	D9_Vanq_ex_peptides.txt	D9_Vanq_ex_proteinGroups.txt	D9_Vanq_ex_fragpipe_combined_ion.tsv	D9_Vanq_ex_fragpipe_combined_peptide.tsv	D9_Vanq_ex_fragpipe_combined_protein.tsv
B9_D_DDA_Vanq_ex_R2.raw	Round_robin_experiment	PYE9_B	D	DDA	Vanq_ex	2	MaxQuant;FragPipe		D9_Vanq_ex_evidence.txt	D9_Vanq_ex_peptides.txt	D9_Vanq_ex_proteinGroups.txt	D9_Vanq_ex_fragpipe_combined_ion.tsv	D9_Vanq_ex_fragpipe_combined_peptide.tsv	D9_Vanq_ex_fragpipe_combined_protein.tsv
B9_D_DDA_Vanq_ex_R3.raw	Round_robin_experiment	PYE9_B	D	DDA	Vanq_ex	3	MaxQuant;FragPipe		D9_Vanq_ex_evidence.txt	D9_Vanq_ex_peptides.txt	D9_Vanq_ex_proteinGroups.txt	D9_Vanq_ex_fragpipe_combined_ion.tsv	D9_Vanq_ex_fragpipe_combined_peptide.tsv	D9_Vanq_ex_fragpipe_combined_protein.tsv
B9_D_DDA_Vanq_ex_R4.raw	Round_robin_experiment	PYE9_B	D	DDA	Vanq_ex	4	MaxQuant;FragPipe		D9_Vanq_ex_evidence.txt	D9_Vanq_ex_peptides.txt	D9_Vanq_ex_proteinGroups.txt	D9_Vanq_ex_fragpipe_combined_ion.tsv	D9_Vanq_ex_fragpipe_combined_peptide.tsv	D9_Vanq_ex_fragpipe_combined_protein.tsv
B9_D_DDA_Vanq_ex_R5.raw	Round_robin_experiment	PYE9_B	D	DDA	Vanq_ex	5	MaxQuant;FragPipe		D9_Vanq_ex_evidence.txt	D9_Vanq_ex_peptides.txt	D9_Vanq_ex_proteinGroups.txt	D9_Vanq_ex_fragpipe_combined_ion.tsv	D9_Vanq_ex_fragpipe_combined_peptide.tsv	D9_Vanq_ex_fragpipe_combined_protein.tsv
B9_D_DDA_ulti_ecl_R1.raw	Round_robin_experiment	PYE9_B	D	DDA	ulti_ecl	1	MaxQuant;FragPipe		D9_ulti_ecl_evidence.txt	D9_ulti_ecl_peptides.txt	D9_ulti_ecl_proteinGroups.txt	D9_ulti_ecl_fragpipe_combined_ion.tsv	D9_ulti_ecl_fragpipe_combined_peptide.tsv	D9_ulti_ecl_fragpipe_combined_protein.tsv
B9_D_DDA_ulti_ecl_R2.raw	Round_robin_experiment	PYE9_B	D	DDA	ulti_ecl	2	MaxQuant;FragPipe		D9_ulti_ecl_evidence.txt	D9_ulti_ecl_peptides.txt	D9_ulti_ecl_proteinGroups.txt	D9_ulti_ecl_fragpipe_combined_ion.tsv	D9_ulti_ecl_fragpipe_combined_peptide.tsv	D9_ulti_ecl_fragpipe_combined_protein.tsv
B9_D_DDA_ulti_ecl_R3.raw	Round_robin_experiment	PYE9_B	D	DDA	ulti_ecl	3	MaxQuant;FragPipe		D9_ulti_ecl_evidence.txt	D9_ulti_ecl_peptides.txt	D9_ulti_ecl_proteinGroups.txt	D9_ulti_ecl_fragpipe_combined_ion.tsv	D9_ulti_ecl_fragpipe_combined_peptide.tsv	D9_ulti_ecl_fragpipe_combined_protein.tsv
B9_D_DDA_ulti_ecl_R4.raw	Round_robin_experiment	PYE9_B	D	DDA	ulti_ecl	4	MaxQuant;FragPipe		D9_ulti_ecl_evidence.txt	D9_ulti_ecl_peptides.txt	D9_ulti_ecl_proteinGroups.txt	D9_ulti_ecl_fragpipe_combined_ion.tsv	D9_ulti_ecl_fragpipe_combined_peptide.tsv	D9_ulti_ecl_fragpipe_combined_protein.tsv
B9_D_DDA_ulti_ecl_R5.raw	Round_robin_experiment	PYE9_B	D	DDA	ulti_ecl	5	MaxQuant;FragPipe		D9_ulti_ecl_evidence.txt	D9_ulti_ecl_peptides.txt	D9_ulti_ecl_proteinGroups.txt	D9_ulti_ecl_fragpipe_combined_ion.tsv	D9_ulti_ecl_fragpipe_combined_peptide.tsv	D9_ulti_ecl_fragpipe_combined_protein.tsv
B9_D_DDA_ulti_ecl_R6.raw	Round_robin_experiment	PYE9_B	D	DDA	ulti_ecl	6	MaxQuant;FragPipe		D9_ulti_ecl_evidence.txt	D9_ulti_ecl_peptides.txt	D9_ulti_ecl_proteinGroups.txt	D9_ulti_ecl_fragpipe_combined_ion.tsv	D9_ulti_ecl_fragpipe_combined_peptide.tsv	D9_ulti_ecl_fragpipe_combined_protein.tsv
B9_D_DIA_Vanq_ex_R1.raw	Round_robin_experiment	PYE9_B	D	DIA	Vanq_ex	1	DIANN;FragPipe	D9_Vanq_ex_report.tsv							D9_Vanq_ex_fragpipe_report.tsv
B9_D_DIA_Vanq_ex_R2.raw	Round_robin_experiment	PYE9_B	D	DIA	Vanq_ex	2	DIANN;FragPipe	D9_Vanq_ex_report.tsv							D9_Vanq_ex_fragpipe_report.tsv
B9_D_DIA_Vanq_ex_R3.raw	Round_robin_experiment	PYE9_B	D	DIA	Vanq_ex	3	DIANN;FragPipe	D9_Vanq_ex_report.tsv							D9_Vanq_ex_fragpipe_report.tsv
B9_D_DIA_Vanq_ex_R4.raw	Round_robin_experiment	PYE9_B	D	DIA	Vanq_ex	4	DIANN;FragPipe	D9_Vanq_ex_report.tsv							D9_Vanq_ex_fragpipe_report.tsv
B9_D_DIA_Vanq_ex_R5.raw	Round_robin_experiment	PYE9_B	D	DIA	Vanq_ex	5	DIANN;FragPipe	D9_Vanq_ex_report.tsv							D9_Vanq_ex_fragpipe_report.tsv
B9_D_DIA_Vanq_ex_R6.raw	Round_robin_experiment	PYE9_B	D	DIA	Vanq_ex	6	DIANN;FragPipe	D9_Vanq_ex_report.tsv							D9_Vanq_ex_fragpipe_report.tsv
B9_D_DIA_ulti_ecl_R1.raw	Round_robin_experiment	PYE9_B	D	DIA	ulti_ecl	1	DIANN;FragPipe	D9_ulti_ecl_report.tsv							D9_ulti_ecl_fragpipe_report.tsv
B9_D_DIA_ulti_ecl_R2.raw	Round_robin_experiment	PYE9_B	D	DIA	ulti_ecl	2	DIANN;FragPipe	D9_ulti_ecl_report.tsv							D9_ulti_ecl_fragpipe_report.tsv
B9_D_DIA_ulti_ecl_R3.raw	Round_robin_experiment	PYE9_B	D	DIA	ulti_ecl	3	DIANN;FragPipe	D9_ulti_ecl_report.tsv							D9_ulti_ecl_fragpipe_report.tsv
B9_D_DIA_ulti_ecl_R4.raw	Round_robin_experiment	PYE9_B	D	DIA	ulti_ecl	4	DIANN;FragPipe	D9_ulti_ecl_report.tsv							D9_ulti_ecl_fragpipe_report.tsv
B9_D_DIA_ulti_ecl_R5.raw	Round_robin_experiment	PYE9_B	D	DIA	ulti_ecl	5	DIANN;FragPipe	D9_ulti_ecl_report.tsv							D9_ulti_ecl_fragpipe_report.tsv
B9_D_DIA_ulti_ecl_R6.raw	Round_robin_experiment	PYE9_B	D	DIA	ulti_ecl	6	DIANN;FragPipe	D9_ulti_ecl_report.tsv							D9_ulti_ecl_fragpipe_report.tsv
B9_E_DDA_Vanq_ex_R1.raw	Round_robin_experiment	PYE9_B	E	DDA	Vanq_ex	1	MaxQuant;FragPipe		E9_Vanq_ex_evidence.txt	E9_Vanq_ex_peptides.txt	E9_Vanq_ex_proteinGroups.txt	E9_Vanq_ex_fragpipe_combined_ion.tsv	E9_Vanq_ex_fragpipe_combined_peptide.tsv	E9_Vanq_ex_fragpipe_combined_protein.tsv
B9_E_DDA_Vanq_ex_R2.raw	Round_robin_experiment	PYE9_B	E	DDA	Vanq_ex	2	MaxQuant;FragPipe		E9_Vanq_ex_evidence.txt	E9_Vanq_ex_peptides.txt	E9_Vanq_ex_proteinGroups.txt	E9_Vanq_ex_fragpipe_combined_ion.tsv	E9_Vanq_ex_fragpipe_combined_peptide.tsv	E9_Vanq_ex_fragpipe_combined_protein.tsv
B9_E_DDA_Vanq_ex_R3.raw	Round_robin_experiment	PYE9_B	E	DDA	Vanq_ex	3	MaxQuant;FragPipe		E9_Vanq_ex_evidence.txt	E9_Vanq_ex_peptides.txt	E9_Vanq_ex_proteinGroups.txt	E9_Vanq_ex_fragpipe_combined_ion.tsv	E9_Vanq_ex_fragpipe_combined_peptide.tsv	E9_Vanq_ex_fragpipe_combined_protein.tsv
B9_E_DDA_Vanq_ex_R4.raw	Round_robin_experiment	PYE9_B	E	DDA	Vanq_ex	4	MaxQuant;FragPipe		E9_Vanq_ex_evidence.txt	E9_Vanq_ex_peptides.txt	E9_Vanq_ex_proteinGroups.txt	E9_Vanq_ex_fragpipe_combined_ion.tsv	E9_Vanq_ex_fragpipe_combined_peptide.tsv	E9_Vanq_ex_fragpipe_combined_protein.tsv
B9_E_DDA_Vanq_ex_R5.raw	Round_robin_experiment	PYE9_B	E	DDA	Vanq_ex	5	MaxQuant;FragPipe		E9_Vanq_ex_evidence.txt	E9_Vanq_ex_peptides.txt	E9_Vanq_ex_proteinGroups.txt	E9_Vanq_ex_fragpipe_combined_ion.tsv	E9_Vanq_ex_fragpipe_combined_peptide.tsv	E9_Vanq_ex_fragpipe_combined_protein.tsv
B9_E_DDA_ulti_lumos_R1.raw	Round_robin_experiment	PYE9_B	E	DDA	ulti_lumos	1	MaxQuant;FragPipe		E9_ulti_lumos_evidence.txt	E9_ulti_lumos_peptides.txt	E9_ulti_lumos_proteinGroups.txt	E9_ulti_lumos_fragpipe_combined_ion.tsv	E9_ulti_lumos_fragpipe_combined_peptide.tsv	E9_ulti_lumos_fragpipe_combined_protein.tsv
B9_E_DDA_ulti_lumos_R2.raw	Round_robin_experiment	PYE9_B	E	DDA	ulti_lumos	2	MaxQuant;FragPipe		E9_ulti_lumos_evidence.txt	E9_ulti_lumos_peptides.txt	E9_ulti_lumos_proteinGroups.txt	E9_ulti_lumos_fragpipe_combined_ion.tsv	E9_ulti_lumos_fragpipe_combined_peptide.tsv	E9_ulti_lumos_fragpipe_combined_protein.tsv
B9_E_DDA_ulti_lumos_R3.raw	Round_robin_experiment	PYE9_B	E	DDA	ulti_lumos	3	MaxQuant;FragPipe		E9_ulti_lumos_evidence.txt	E9_ulti_lumos_peptides.txt	E9_ulti_lumos_proteinGroups.txt	E9_ulti_lumos_fragpipe_combined_ion.tsv	E9_ulti_lumos_fragpipe_combined_peptide.tsv	E9_ulti_lumos_fragpipe_combined_protein.tsv
B9_E_DDA_ulti_lumos_R4.raw	Round_robin_experiment	PYE9_B	E	DDA	ulti_lumos	4	MaxQuant;FragPipe		E9_ulti_lumos_evidence.txt	E9_ulti_lumos_peptides.txt	E9_ulti_lumos_proteinGroups.txt	E9_ulti_lumos_fragpipe_combined_ion.tsv	E9_ulti_lumos_fragpipe_combined_peptide.tsv	E9_ulti_lumos_fragpipe_combined_protein.tsv
B9_E_DDA_ulti_lumos_R5.raw	Round_robin_experiment	PYE9_B	E	DDA	ulti_lumos	5	MaxQuant;FragPipe		E9_ulti_lumos_evidence.txt	E9_ulti_lumos_peptides.txt	E9_ulti_lumos_proteinGroups.txt	E9_ulti_lumos_fragpipe_combined_ion.tsv	E9_ulti_lumos_fragpipe_combined_peptide.tsv	E9_ulti_lumos_fragpipe_combined_protein.tsv
B9_E_DDA_ulti_lumos_R6.raw	Round_robin_experiment	PYE9_B	E	DDA	ulti_lumos	6	MaxQuant;FragPipe		E9_ulti_lumos_evidence.txt	E9_ulti_lumos_peptides.txt	E9_ulti_lumos_proteinGroups.txt	E9_ulti_lumos_fragpipe_combined_ion.tsv	E9_ulti_lumos_fragpipe_combined_peptide.tsv	E9_ulti_lumos_fragpipe_combined_protein.tsv
B9_E_DIA_Vanq_ex_R1.raw	Round_robin_experiment	PYE9_B	E	DIA	Vanq_ex	1	DIANN;FragPipe	E9_Vanq_ex_report.tsv							E9_Vanq_ex_fragpipe_report.tsv
B9_E_DIA_Vanq_ex_R2.raw	Round_robin_experiment	PYE9_B	E	DIA	Vanq_ex	2	DIANN;FragPipe	E9_Vanq_ex_report.tsv							E9_Vanq_ex_fragpipe_report.tsv
B9_E_DIA_Vanq_ex_R3.raw	Round_robin_experiment	PYE9_B	E	DIA	Vanq_ex	3	DIANN;FragPipe	E9_Vanq_ex_report.tsv							E9_Vanq_ex_fragpipe_report.tsv
B9_E_DIA_Vanq_ex_R4.raw	Round_robin_experiment	PYE9_B	E	DIA	Vanq_ex	4	DIANN;FragPipe	E9_Vanq_ex_report.tsv							E9_Vanq_ex_fragpipe_report.tsv
B9_E_DIA_Vanq_ex_R5.raw	Round_robin_experiment	PYE9_B	E	DIA	Vanq_ex	5	DIANN;FragPipe	E9_Vanq_ex_report.tsv							E9_Vanq_ex_fragpipe_report.tsv
B9_E_DIA_ulti_lumos_R1.raw	Round_robin_experiment	PYE9_B	E	DIA	ulti_lumos	1	DIANN;FragPipe	E9_ulti_lumos_report.tsv							E9_ulti_lumos_fragpipe_report.tsv
B9_E_DIA_ulti_lumos_R2.raw	Round_robin_experiment	PYE9_B	E	DIA	ulti_lumos	2	DIANN;FragPipe	E9_ulti_lumos_report.tsv							E9_ulti_lumos_fragpipe_report.tsv
B9_E_DIA_ulti_lumos_R3.raw	Round_robin_experiment	PYE9_B	E	DIA	ulti_lumos	3	DIANN;FragPipe	E9_ulti_lumos_report.tsv							E9_ulti_lumos_fragpipe_report.tsv
B9_E_DIA_ulti_lumos_R4.raw	Round_robin_experiment	PYE9_B	E	DIA	ulti_lumos	4	DIANN;FragPipe	E9_ulti_lumos_report.tsv							E9_ulti_lumos_fragpipe_report.tsv
B9_E_DIA_ulti_lumos_R5.raw	Round_robin_experiment	PYE9_B	E	DIA	ulti_lumos	5	DIANN;FragPipe	E9_ulti_lumos_report.tsv							E9_ulti_lumos_fragpipe_report.tsv
B9_E_DIA_ulti_lumos_R6.raw	Round_robin_experiment	PYE9_B	E	DIA	ulti_lumos	6	DIANN;FragPipe	E9_ulti_lumos_report.tsv							E9_ulti_lumos_fragpipe_report.tsv
B9_F_DDA_Vanq_ecl_R1.raw	Round_robin_experiment	PYE9_B	F	DDA	Vanq_ecl	1	MaxQuant;FragPipe		F9_Vanq_ecl_evidence.txt	F9_Vanq_ecl_peptides.txt	F9_Vanq_ecl_proteinGroups.txt	F9_Vanq_ecl_fragpipe_combined_ion.tsv	F9_Vanq_ecl_fragpipe_combined_peptide.tsv	F9_Vanq_ecl_fragpipe_combined_protein.tsv
B9_F_DDA_Vanq_ecl_R2.raw	Round_robin_experiment	PYE9_B	F	DDA	Vanq_ecl	2	MaxQuant;FragPipe		F9_Vanq_ecl_evidence.txt	F9_Vanq_ecl_peptides.txt	F9_Vanq_ecl_proteinGroups.txt	F9_Vanq_ecl_fragpipe_combined_ion.tsv	F9_Vanq_ecl_fragpipe_combined_peptide.tsv	F9_Vanq_ecl_fragpipe_combined_protein.tsv
B9_F_DDA_Vanq_ecl_R3.raw	Round_robin_experiment	PYE9_B	F	DDA	Vanq_ecl	3	MaxQuant;FragPipe		F9_Vanq_ecl_evidence.txt	F9_Vanq_ecl_peptides.txt	F9_Vanq_ecl_proteinGroups.txt	F9_Vanq_ecl_fragpipe_combined_ion.tsv	F9_Vanq_ecl_fragpipe_combined_peptide.tsv	F9_Vanq_ecl_fragpipe_combined_protein.tsv
B9_F_DDA_Vanq_ecl_R4.raw	Round_robin_experiment	PYE9_B	F	DDA	Vanq_ecl	4	MaxQuant;FragPipe		F9_Vanq_ecl_evidence.txt	F9_Vanq_ecl_peptides.txt	F9_Vanq_ecl_proteinGroups.txt	F9_Vanq_ecl_fragpipe_combined_ion.tsv	F9_Vanq_ecl_fragpipe_combined_peptide.tsv	F9_Vanq_ecl_fragpipe_combined_protein.tsv
B9_F_DDA_Vanq_ecl_R5.raw	Round_robin_experiment	PYE9_B	F	DDA	Vanq_ecl	5	MaxQuant;FragPipe		F9_Vanq_ecl_evidence.txt	F9_Vanq_ecl_peptides.txt	F9_Vanq_ecl_proteinGroups.txt	F9_Vanq_ecl_fragpipe_combined_ion.tsv	F9_Vanq_ecl_fragpipe_combined_peptide.tsv	F9_Vanq_ecl_fragpipe_combined_protein.tsv
B9_F_DDA_Vanq_ecl_R6.raw	Round_robin_experiment	PYE9_B	F	DDA	Vanq_ecl	6	MaxQuant;FragPipe		F9_Vanq_ecl_evidence.txt	F9_Vanq_ecl_peptides.txt	F9_Vanq_ecl_proteinGroups.txt	F9_Vanq_ecl_fragpipe_combined_ion.tsv	F9_Vanq_ecl_fragpipe_combined_peptide.tsv	F9_Vanq_ecl_fragpipe_combined_protein.tsv
B9_G_DDA_ulti_ex_R1.raw	Round_robin_experiment	PYE9_B	G	DDA	ulti_ex	1	MaxQuant;FragPipe		G9_ulti_ex_evidence.txt	G9_ulti_ex_peptides.txt	G9_ulti_ex_proteinGroups.txt	G9_ulti_ex_fragpipe_combined_ion.tsv	G9_ulti_ex_fragpipe_combined_peptide.tsv	G9_ulti_ex_fragpipe_combined_protein.tsv
B9_G_DDA_ulti_ex_R2.raw	Round_robin_experiment	PYE9_B	G	DDA	ulti_ex	2	MaxQuant;FragPipe		G9_ulti_ex_evidence.txt	G9_ulti_ex_peptides.txt	G9_ulti_ex_proteinGroups.txt	G9_ulti_ex_fragpipe_combined_ion.tsv	G9_ulti_ex_fragpipe_combined_peptide.tsv	G9_ulti_ex_fragpipe_combined_protein.tsv
B9_G_DDA_ulti_ex_R3.raw	Round_robin_experiment	PYE9_B	G	DDA	ulti_ex	3	MaxQuant;FragPipe		G9_ulti_ex_evidence.txt	G9_ulti_ex_peptides.txt	G9_ulti_ex_proteinGroups.txt	G9_ulti_ex_fragpipe_combined_ion.tsv	G9_ulti_ex_fragpipe_combined_peptide.tsv	G9_ulti_ex_fragpipe_combined_protein.tsv
B9_G_DDA_ulti_ex_R4.raw	Round_robin_experiment	PYE9_B	G	DDA	ulti_ex	4	MaxQuant;FragPipe		G9_ulti_ex_evidence.txt	G9_ulti_ex_peptides.txt	G9_ulti_ex_proteinGroups.txt	G9_ulti_ex_fragpipe_combined_ion.tsv	G9_ulti_ex_fragpipe_combined_peptide.tsv	G9_ulti_ex_fragpipe_combined_protein.tsv
B9_G_DDA_ulti_ex_R5.raw	Round_robin_experiment	PYE9_B	G	DDA	ulti_ex	5	MaxQuant;FragPipe		G9_ulti_ex_evidence.txt	G9_ulti_ex_peptides.txt	G9_ulti_ex_proteinGroups.txt	G9_ulti_ex_fragpipe_combined_ion.tsv	G9_ulti_ex_fragpipe_combined_peptide.tsv	G9_ulti_ex_fragpipe_combined_protein.tsv
B9_G_DDA_ulti_ex_R6.raw	Round_robin_experiment	PYE9_B	G	DDA	ulti_ex	6	MaxQuant;FragPipe		G9_ulti_ex_evidence.txt	G9_ulti_ex_peptides.txt	G9_ulti_ex_proteinGroups.txt	G9_ulti_ex_fragpipe_combined_ion.tsv	G9_ulti_ex_fragpipe_combined_peptide.tsv	G9_ulti_ex_fragpipe_combined_protein.tsv
B9_G_DIA_ulti_ex_R1.raw	Round_robin_experiment	PYE9_B	G	DIA	ulti_ex	1	DIANN;FragPipe	G9_ulti_ex_report.tsv							G9_ulti_ex_fragpipe_report.tsv
B9_G_DIA_ulti_ex_R2.raw	Round_robin_experiment	PYE9_B	G	DIA	ulti_ex	2	DIANN;FragPipe	G9_ulti_ex_report.tsv							G9_ulti_ex_fragpipe_report.tsv
B9_G_DIA_ulti_ex_R3.raw	Round_robin_experiment	PYE9_B	G	DIA	ulti_ex	3	DIANN;FragPipe	G9_ulti_ex_report.tsv							G9_ulti_ex_fragpipe_report.tsv
B9_G_DIA_ulti_ex_R4.raw	Round_robin_experiment	PYE9_B	G	DIA	ulti_ex	4	DIANN;FragPipe	G9_ulti_ex_report.tsv							G9_ulti_ex_fragpipe_report.tsv
B9_G_DIA_ulti_ex_R5.raw	Round_robin_experiment	PYE9_B	G	DIA	ulti_ex	5	DIANN;FragPipe	G9_ulti_ex_report.tsv							G9_ulti_ex_fragpipe_report.tsv
B9_G_DIA_ulti_ex_R6.raw	Round_robin_experiment	PYE9_B	G	DIA	ulti_ex	6	DIANN;FragPipe	G9_ulti_ex_report.tsv							G9_ulti_ex_fragpipe_report.tsv
B9_K_DIA_Mclass_zTOF_R1.wiff	Round_robin_experiment	PYE9_B	K	DIA	Mclass_zTOF	1	DIANN;FragPipe	K9_Mclass_zTOF_report.tsv							K9_Mclass_zTOF_fragpipe_report.tsv
B9_K_DIA_Mclass_zTOF_R1.wiff.scan	Round_robin_experiment	PYE9_B	K	DIA	Mclass_zTOF	1	DIANN;FragPipe	K9_Mclass_zTOF_report.tsv							K9_Mclass_zTOF_fragpipe_report.tsv
B9_K_DIA_Mclass_zTOF_R2.wiff	Round_robin_experiment	PYE9_B	K	DIA	Mclass_zTOF	2	DIANN;FragPipe	K9_Mclass_zTOF_report.tsv							K9_Mclass_zTOF_fragpipe_report.tsv
B9_K_DIA_Mclass_zTOF_R2.wiff.scan	Round_robin_experiment	PYE9_B	K	DIA	Mclass_zTOF	2	DIANN;FragPipe	K9_Mclass_zTOF_report.tsv							K9_Mclass_zTOF_fragpipe_report.tsv
B9_K_DIA_Mclass_zTOF_R3.wiff	Round_robin_experiment	PYE9_B	K	DIA	Mclass_zTOF	3	DIANN;FragPipe	K9_Mclass_zTOF_report.tsv							K9_Mclass_zTOF_fragpipe_report.tsv
B9_K_DIA_Mclass_zTOF_R3.wiff.scan	Round_robin_experiment	PYE9_B	K	DIA	Mclass_zTOF	3	DIANN;FragPipe	K9_Mclass_zTOF_report.tsv							K9_Mclass_zTOF_fragpipe_report.tsv
B9_K_DIA_Mclass_zTOF_R4.wiff	Round_robin_experiment	PYE9_B	K	DIA	Mclass_zTOF	4	DIANN;FragPipe	K9_Mclass_zTOF_report.tsv							K9_Mclass_zTOF_fragpipe_report.tsv
B9_K_DIA_Mclass_zTOF_R4.wiff.scan	Round_robin_experiment	PYE9_B	K	DIA	Mclass_zTOF	4	DIANN;FragPipe	K9_Mclass_zTOF_report.tsv							K9_Mclass_zTOF_fragpipe_report.tsv
B9_K_DIA_Mclass_zTOF_R5.wiff	Round_robin_experiment	PYE9_B	K	DIA	Mclass_zTOF	5	DIANN;FragPipe	K9_Mclass_zTOF_report.tsv							K9_Mclass_zTOF_fragpipe_report.tsv
B9_K_DIA_Mclass_zTOF_R5.wiff.scan	Round_robin_experiment	PYE9_B	K	DIA	Mclass_zTOF	5	DIANN;FragPipe	K9_Mclass_zTOF_report.tsv							K9_Mclass_zTOF_fragpipe_report.tsv
B9_K_DIA_Mclass_zTOF_R6.wiff	Round_robin_experiment	PYE9_B	K	DIA	Mclass_zTOF	6	DIANN;FragPipe	K9_Mclass_zTOF_report.tsv							K9_Mclass_zTOF_fragpipe_report.tsv
B9_K_DIA_Mclass_zTOF_R6.wiff.scan	Round_robin_experiment	PYE9_B	K	DIA	Mclass_zTOF	6	DIANN;FragPipe	K9_Mclass_zTOF_report.tsv							K9_Mclass_zTOF_fragpipe_report.tsv
A1_I_DIA_nLC_ex_R1.raw	Round_robin_experiment	PYE1_A	I	DIA	nLC_ex	1	DIANN;FragPipe	I1_nLC_ex_report.tsv							I1_nLC_ex_fragpipe_report.tsv
A1_I_DIA_nLC_ex_R2.raw	Round_robin_experiment	PYE1_A	I	DIA	nLC_ex	2	DIANN;FragPipe	I1_nLC_ex_report.tsv							I1_nLC_ex_fragpipe_report.tsv
A1_I_DIA_nLC_ex_R3.raw	Round_robin_experiment	PYE1_A	I	DIA	nLC_ex	3	DIANN;FragPipe	I1_nLC_ex_report.tsv							I1_nLC_ex_fragpipe_report.tsv
A1_I_DIA_nLC_ex_R4.raw	Round_robin_experiment	PYE1_A	I	DIA	nLC_ex	4	DIANN;FragPipe	I1_nLC_ex_report.tsv							I1_nLC_ex_fragpipe_report.tsv
A1_I_DIA_nLC_ex_R5.raw	Round_robin_experiment	PYE1_A	I	DIA	nLC_ex	5	DIANN;FragPipe	I1_nLC_ex_report.tsv							I1_nLC_ex_fragpipe_report.tsv
A1_I_DIA_nLC_ex_R6.raw	Round_robin_experiment	PYE1_A	I	DIA	nLC_ex	6	DIANN;FragPipe	I1_nLC_ex_report.tsv							I1_nLC_ex_fragpipe_report.tsv
A3_I_DIA_nLC_ex_R1.raw	Round_robin_experiment	PYE3_A	I	DIA	nLC_ex	1	DIANN;FragPipe	I3_nLC_ex_report.tsv							I3_nLC_ex_fragpipe_report.tsv
A3_I_DIA_nLC_ex_R2.raw	Round_robin_experiment	PYE3_A	I	DIA	nLC_ex	2	DIANN;FragPipe	I3_nLC_ex_report.tsv							I3_nLC_ex_fragpipe_report.tsv
A3_I_DIA_nLC_ex_R3.raw	Round_robin_experiment	PYE3_A	I	DIA	nLC_ex	3	DIANN;FragPipe	I3_nLC_ex_report.tsv							I3_nLC_ex_fragpipe_report.tsv
A3_I_DIA_nLC_ex_R4.raw	Round_robin_experiment	PYE3_A	I	DIA	nLC_ex	4	DIANN;FragPipe	I3_nLC_ex_report.tsv							I3_nLC_ex_fragpipe_report.tsv
A3_I_DIA_nLC_ex_R5.raw	Round_robin_experiment	PYE3_A	I	DIA	nLC_ex	5	DIANN;FragPipe	I3_nLC_ex_report.tsv							I3_nLC_ex_fragpipe_report.tsv
A3_I_DIA_nLC_ex_R6.raw	Round_robin_experiment	PYE3_A	I	DIA	nLC_ex	6	DIANN;FragPipe	I3_nLC_ex_report.tsv							I3_nLC_ex_fragpipe_report.tsv
A9_I_DIA_nLC_ex_R1.raw	Round_robin_experiment	PYE9_A	I	DIA	nLC_ex	1	DIANN;FragPipe	I9_nLC_ex_report.tsv							I9_nLC_ex_fragpipe_report.tsv
A9_I_DIA_nLC_ex_R2.raw	Round_robin_experiment	PYE9_A	I	DIA	nLC_ex	2	DIANN;FragPipe	I9_nLC_ex_report.tsv							I9_nLC_ex_fragpipe_report.tsv
A9_I_DIA_nLC_ex_R3.raw	Round_robin_experiment	PYE9_A	I	DIA	nLC_ex	3	DIANN;FragPipe	I9_nLC_ex_report.tsv							I9_nLC_ex_fragpipe_report.tsv
A9_I_DIA_nLC_ex_R4.raw	Round_robin_experiment	PYE9_A	I	DIA	nLC_ex	4	DIANN;FragPipe	I9_nLC_ex_report.tsv							I9_nLC_ex_fragpipe_report.tsv
A9_I_DIA_nLC_ex_R5.raw	Round_robin_experiment	PYE9_A	I	DIA	nLC_ex	5	DIANN;FragPipe	I9_nLC_ex_report.tsv							I9_nLC_ex_fragpipe_report.tsv
A9_I_DIA_nLC_ex_R6.raw	Round_robin_experiment	PYE9_A	I	DIA	nLC_ex	6	DIANN;FragPipe	I9_nLC_ex_report.tsv							I9_nLC_ex_fragpipe_report.tsv
B1_I_DIA_nLC_ex_R1.raw	Round_robin_experiment	PYE1_B	I	DIA	nLC_ex	1	DIANN;FragPipe	I1_nLC_ex_report.tsv							I1_nLC_ex_fragpipe_report.tsv
B1_I_DIA_nLC_ex_R2.raw	Round_robin_experiment	PYE1_B	I	DIA	nLC_ex	2	DIANN;FragPipe	I1_nLC_ex_report.tsv							I1_nLC_ex_fragpipe_report.tsv
B1_I_DIA_nLC_ex_R3.raw	Round_robin_experiment	PYE1_B	I	DIA	nLC_ex	3	DIANN;FragPipe	I1_nLC_ex_report.tsv							I1_nLC_ex_fragpipe_report.tsv
B1_I_DIA_nLC_ex_R4.raw	Round_robin_experiment	PYE1_B	I	DIA	nLC_ex	4	DIANN;FragPipe	I1_nLC_ex_report.tsv							I1_nLC_ex_fragpipe_report.tsv
B1_I_DIA_nLC_ex_R5.raw	Round_robin_experiment	PYE1_B	I	DIA	nLC_ex	5	DIANN;FragPipe	I1_nLC_ex_report.tsv							I1_nLC_ex_fragpipe_report.tsv
B1_I_DIA_nLC_ex_R6.raw	Round_robin_experiment	PYE1_B	I	DIA	nLC_ex	6	DIANN;FragPipe	I1_nLC_ex_report.tsv							I1_nLC_ex_fragpipe_report.tsv
B3_I_DIA_nLC_ex_R1.raw	Round_robin_experiment	PYE3_B	I	DIA	nLC_ex	1	DIANN;FragPipe	I3_nLC_ex_report.tsv							I3_nLC_ex_fragpipe_report.tsv
B3_I_DIA_nLC_ex_R2.raw	Round_robin_experiment	PYE3_B	I	DIA	nLC_ex	2	DIANN;FragPipe	I3_nLC_ex_report.tsv							I3_nLC_ex_fragpipe_report.tsv
B3_I_DIA_nLC_ex_R3.raw	Round_robin_experiment	PYE3_B	I	DIA	nLC_ex	3	DIANN;FragPipe	I3_nLC_ex_report.tsv							I3_nLC_ex_fragpipe_report.tsv
B3_I_DIA_nLC_ex_R4.raw	Round_robin_experiment	PYE3_B	I	DIA	nLC_ex	4	DIANN;FragPipe	I3_nLC_ex_report.tsv							I3_nLC_ex_fragpipe_report.tsv
B3_I_DIA_nLC_ex_R5.raw	Round_robin_experiment	PYE3_B	I	DIA	nLC_ex	5	DIANN;FragPipe	I3_nLC_ex_report.tsv							I3_nLC_ex_fragpipe_report.tsv
B3_I_DIA_nLC_ex_R6.raw	Round_robin_experiment	PYE3_B	I	DIA	nLC_ex	6	DIANN;FragPipe	I3_nLC_ex_report.tsv							I3_nLC_ex_fragpipe_report.tsv
B9_I_DIA_nLC_ex_R1.raw	Round_robin_experiment	PYE9_B	I	DIA	nLC_ex	1	DIANN;FragPipe	I9_nLC_ex_report.tsv							I9_nLC_ex_fragpipe_report.tsv
B9_I_DIA_nLC_ex_R2.raw	Round_robin_experiment	PYE9_B	I	DIA	nLC_ex	2	DIANN;FragPipe	I9_nLC_ex_report.tsv							I9_nLC_ex_fragpipe_report.tsv
B9_I_DIA_nLC_ex_R3.raw	Round_robin_experiment	PYE9_B	I	DIA	nLC_ex	3	DIANN;FragPipe	I9_nLC_ex_report.tsv							I9_nLC_ex_fragpipe_report.tsv
B9_I_DIA_nLC_ex_R4.raw	Round_robin_experiment	PYE9_B	I	DIA	nLC_ex	4	DIANN;FragPipe	I9_nLC_ex_report.tsv							I9_nLC_ex_fragpipe_report.tsv
B9_I_DIA_nLC_ex_R5.raw	Round_robin_experiment	PYE9_B	I	DIA	nLC_ex	5	DIANN;FragPipe	I9_nLC_ex_report.tsv							I9_nLC_ex_fragpipe_report.tsv
B9_I_DIA_nLC_ex_R6.raw	Round_robin_experiment	PYE9_B	I	DIA	nLC_ex	6	DIANN;FragPipe	I9_nLC_ex_report.tsv							I9_nLC_ex_fragpipe_report.tsv
A9_H_DIA_ulti_ecl_R1.raw	Round_robin_experiment	PYE9_A	H	DIA	ulti_ecl	1	DIANN;FragPipe	H9_ulti_ecl_report.tsv							H9_ulti_ecl_fragpipe_report.tsv
B9_H_DIA_ulti_ecl_R1.raw	Round_robin_experiment	PYE9_B	H	DIA	ulti_ecl	1	DIANN;FragPipe	H9_ulti_ecl_report.tsv							H9_ulti_ecl_fragpipe_report.tsv
A3_H_DIA_ulti_ecl_R1.raw	Round_robin_experiment	PYE3_A	H	DIA	ulti_ecl	1	DIANN;FragPipe	H3_ulti_ecl_report.tsv							H3_ulti_ecl_fragpipe_report.tsv
B3_H_DIA_ulti_ecl_R1.raw	Round_robin_experiment	PYE3_B	H	DIA	ulti_ecl	1	DIANN;FragPipe	H3_ulti_ecl_report.tsv							H3_ulti_ecl_fragpipe_report.tsv
A1_H_DIA_ulti_ecl_R1.raw	Round_robin_experiment	PYE1_A	H	DIA	ulti_ecl	1	DIANN;FragPipe	H1_ulti_ecl_report.tsv							H1_ulti_ecl_fragpipe_report.tsv
B1_H_DIA_ulti_ecl_R1.raw	Round_robin_experiment	PYE1_B	H	DIA	ulti_ecl	1	DIANN;FragPipe	H1_ulti_ecl_report.tsv							H1_ulti_ecl_fragpipe_report.tsv
A9_H_DIA_ulti_ecl_R2.raw	Round_robin_experiment	PYE9_A	H	DIA	ulti_ecl	2	DIANN;FragPipe	H9_ulti_ecl_report.tsv							H9_ulti_ecl_fragpipe_report.tsv
B9_H_DIA_ulti_ecl_R2.raw	Round_robin_experiment	PYE9_B	H	DIA	ulti_ecl	2	DIANN;FragPipe	H9_ulti_ecl_report.tsv							H9_ulti_ecl_fragpipe_report.tsv
A3_H_DIA_ulti_ecl_R2.raw	Round_robin_experiment	PYE3_A	H	DIA	ulti_ecl	2	DIANN;FragPipe	H3_ulti_ecl_report.tsv							H3_ulti_ecl_fragpipe_report.tsv
B3_H_DIA_ulti_ecl_R2.raw	Round_robin_experiment	PYE3_B	H	DIA	ulti_ecl	2	DIANN;FragPipe	H3_ulti_ecl_report.tsv							H3_ulti_ecl_fragpipe_report.tsv
A1_H_DIA_ulti_ecl_R2.raw	Round_robin_experiment	PYE1_A	H	DIA	ulti_ecl	2	DIANN;FragPipe	H1_ulti_ecl_report.tsv							H1_ulti_ecl_fragpipe_report.tsv
B1_H_DIA_ulti_ecl_R2.raw	Round_robin_experiment	PYE1_B	H	DIA	ulti_ecl	2	DIANN;FragPipe	H1_ulti_ecl_report.tsv							H1_ulti_ecl_fragpipe_report.tsv
A9_H_DIA_ulti_ecl_R3.raw	Round_robin_experiment	PYE9_A	H	DIA	ulti_ecl	3	DIANN;FragPipe	H9_ulti_ecl_report.tsv							H9_ulti_ecl_fragpipe_report.tsv
B9_H_DIA_ulti_ecl_R3.raw	Round_robin_experiment	PYE9_B	H	DIA	ulti_ecl	3	DIANN;FragPipe	H9_ulti_ecl_report.tsv							H9_ulti_ecl_fragpipe_report.tsv
A3_H_DIA_ulti_ecl_R3.raw	Round_robin_experiment	PYE3_A	H	DIA	ulti_ecl	3	DIANN;FragPipe	H3_ulti_ecl_report.tsv							H3_ulti_ecl_fragpipe_report.tsv
B3_H_DIA_ulti_ecl_R3.raw	Round_robin_experiment	PYE3_B	H	DIA	ulti_ecl	3	DIANN;FragPipe	H3_ulti_ecl_report.tsv							H3_ulti_ecl_fragpipe_report.tsv
A1_H_DIA_ulti_ecl_R3.raw	Round_robin_experiment	PYE1_A	H	DIA	ulti_ecl	3	DIANN;FragPipe	H1_ulti_ecl_report.tsv							H1_ulti_ecl_fragpipe_report.tsv
B1_H_DIA_ulti_ecl_R3.raw	Round_robin_experiment	PYE1_B	H	DIA	ulti_ecl	3	DIANN;FragPipe	H1_ulti_ecl_report.tsv							H1_ulti_ecl_fragpipe_report.tsv
A9_H_DIA_ulti_ecl_R4.raw	Round_robin_experiment	PYE9_A	H	DIA	ulti_ecl	4	DIANN;FragPipe	H9_ulti_ecl_report.tsv							H9_ulti_ecl_fragpipe_report.tsv
B9_H_DIA_ulti_ecl_R4.raw	Round_robin_experiment	PYE9_B	H	DIA	ulti_ecl	4	DIANN;FragPipe	H9_ulti_ecl_report.tsv							H9_ulti_ecl_fragpipe_report.tsv
A3_H_DIA_ulti_ecl_R4.raw	Round_robin_experiment	PYE3_A	H	DIA	ulti_ecl	4	DIANN;FragPipe	H3_ulti_ecl_report.tsv							H3_ulti_ecl_fragpipe_report.tsv
B3_H_DIA_ulti_ecl_R4.raw	Round_robin_experiment	PYE3_B	H	DIA	ulti_ecl	4	DIANN;FragPipe	H3_ulti_ecl_report.tsv							H3_ulti_ecl_fragpipe_report.tsv
A1_H_DIA_ulti_ecl_R4.raw	Round_robin_experiment	PYE1_A	H	DIA	ulti_ecl	4	DIANN;FragPipe	H1_ulti_ecl_report.tsv							H1_ulti_ecl_fragpipe_report.tsv
B1_H_DIA_ulti_ecl_R4.raw	Round_robin_experiment	PYE1_B	H	DIA	ulti_ecl	4	DIANN;FragPipe	H1_ulti_ecl_report.tsv							H1_ulti_ecl_fragpipe_report.tsv
A9_H_DIA_ulti_ecl_R5.raw	Round_robin_experiment	PYE9_A	H	DIA	ulti_ecl	5	DIANN;FragPipe	H9_ulti_ecl_report.tsv							H9_ulti_ecl_fragpipe_report.tsv
B9_H_DIA_ulti_ecl_R5.raw	Round_robin_experiment	PYE9_B	H	DIA	ulti_ecl	5	DIANN;FragPipe	H9_ulti_ecl_report.tsv							H9_ulti_ecl_fragpipe_report.tsv
A3_H_DIA_ulti_ecl_R5.raw	Round_robin_experiment	PYE3_A	H	DIA	ulti_ecl	5	DIANN;FragPipe	H3_ulti_ecl_report.tsv							H3_ulti_ecl_fragpipe_report.tsv
B3_H_DIA_ulti_ecl_R5.raw	Round_robin_experiment	PYE3_B	H	DIA	ulti_ecl	5	DIANN;FragPipe	H3_ulti_ecl_report.tsv							H3_ulti_ecl_fragpipe_report.tsv
A1_H_DIA_ulti_ecl_R5.raw	Round_robin_experiment	PYE1_A	H	DIA	ulti_ecl	5	DIANN;FragPipe	H1_ulti_ecl_report.tsv							H1_ulti_ecl_fragpipe_report.tsv
B1_H_DIA_ulti_ecl_R5.raw	Round_robin_experiment	PYE1_B	H	DIA	ulti_ecl	5	DIANN;FragPipe	H1_ulti_ecl_report.tsv							H1_ulti_ecl_fragpipe_report.tsv
A9_H_DIA_ulti_ecl_R6.raw	Round_robin_experiment	PYE9_A	H	DIA	ulti_ecl	6	DIANN;FragPipe	H9_ulti_ecl_report.tsv							H9_ulti_ecl_fragpipe_report.tsv
B9_H_DIA_ulti_ecl_R6.raw	Round_robin_experiment	PYE9_B	H	DIA	ulti_ecl	6	DIANN;FragPipe	H9_ulti_ecl_report.tsv							H9_ulti_ecl_fragpipe_report.tsv
A3_H_DIA_ulti_ecl_R6.raw	Round_robin_experiment	PYE3_A	H	DIA	ulti_ecl	6	DIANN;FragPipe	H3_ulti_ecl_report.tsv							H3_ulti_ecl_fragpipe_report.tsv
B3_H_DIA_ulti_ecl_R6.raw	Round_robin_experiment	PYE3_B	H	DIA	ulti_ecl	6	DIANN;FragPipe	H3_ulti_ecl_report.tsv							H3_ulti_ecl_fragpipe_report.tsv
A1_H_DIA_ulti_ecl_R6.raw	Round_robin_experiment	PYE1_A	H	DIA	ulti_ecl	6	DIANN;FragPipe	H1_ulti_ecl_report.tsv							H1_ulti_ecl_fragpipe_report.tsv
B1_H_DIA_ulti_ecl_R6.raw	Round_robin_experiment	PYE1_B	H	DIA	ulti_ecl	6	DIANN;FragPipe	H1_ulti_ecl_report.tsv							H1_ulti_ecl_fragpipe_report.tsv
A9_H_DDA_ulti_ecl_R1.raw	Round_robin_experiment	PYE9_A	H	DDA	ulti_ecl	1	MaxQuant;FragPipe		H9_ulti_ecl_evidence.txt	H9_ulti_ecl_peptides.txt	H9_ulti_ecl_proteinGroups.txt	H9_ulti_ecl_fragpipe_combined_ion.tsv	H9_ulti_ecl_fragpipe_combined_peptide.tsv	H9_ulti_ecl_fragpipe_combined_protein.tsv
B9_H_DDA_ulti_ecl_R1.raw	Round_robin_experiment	PYE9_B	H	DDA	ulti_ecl	1	MaxQuant;FragPipe		H9_ulti_ecl_evidence.txt	H9_ulti_ecl_peptides.txt	H9_ulti_ecl_proteinGroups.txt	H9_ulti_ecl_fragpipe_combined_ion.tsv	H9_ulti_ecl_fragpipe_combined_peptide.tsv	H9_ulti_ecl_fragpipe_combined_protein.tsv
A3_H_DDA_ulti_ecl_R1.raw	Round_robin_experiment	PYE3_A	H	DDA	ulti_ecl	1	MaxQuant;FragPipe		H3_ulti_ecl_evidence.txt	H3_ulti_ecl_peptides.txt	H3_ulti_ecl_proteinGroups.txt	H3_ulti_ecl_fragpipe_combined_ion.tsv	H3_ulti_ecl_fragpipe_combined_peptide.tsv	H3_ulti_ecl_fragpipe_combined_protein.tsv
B3_H_DDA_ulti_ecl_R1.raw	Round_robin_experiment	PYE3_B	H	DDA	ulti_ecl	1	MaxQuant;FragPipe		H3_ulti_ecl_evidence.txt	H3_ulti_ecl_peptides.txt	H3_ulti_ecl_proteinGroups.txt	H3_ulti_ecl_fragpipe_combined_ion.tsv	H3_ulti_ecl_fragpipe_combined_peptide.tsv	H3_ulti_ecl_fragpipe_combined_protein.tsv
A1_H_DDA_ulti_ecl_R1.raw	Round_robin_experiment	PYE1_A	H	DDA	ulti_ecl	1	MaxQuant;FragPipe		H1_ulti_ecl_evidence.txt	H1_ulti_ecl_peptides.txt	H1_ulti_ecl_proteinGroups.txt	H1_ulti_ecl_fragpipe_combined_ion.tsv	H1_ulti_ecl_fragpipe_combined_peptide.tsv	H1_ulti_ecl_fragpipe_combined_protein.tsv
B1_H_DDA_ulti_ecl_R1.raw	Round_robin_experiment	PYE1_B	H	DDA	ulti_ecl	1	MaxQuant;FragPipe		H1_ulti_ecl_evidence.txt	H1_ulti_ecl_peptides.txt	H1_ulti_ecl_proteinGroups.txt	H1_ulti_ecl_fragpipe_combined_ion.tsv	H1_ulti_ecl_fragpipe_combined_peptide.tsv	H1_ulti_ecl_fragpipe_combined_protein.tsv
A9_H_DDA_ulti_ecl_R2.raw	Round_robin_experiment	PYE9_A	H	DDA	ulti_ecl	2	MaxQuant;FragPipe		H9_ulti_ecl_evidence.txt	H9_ulti_ecl_peptides.txt	H9_ulti_ecl_proteinGroups.txt	H9_ulti_ecl_fragpipe_combined_ion.tsv	H9_ulti_ecl_fragpipe_combined_peptide.tsv	H9_ulti_ecl_fragpipe_combined_protein.tsv
B9_H_DDA_ulti_ecl_R2.raw	Round_robin_experiment	PYE9_B	H	DDA	ulti_ecl	2	MaxQuant;FragPipe		H9_ulti_ecl_evidence.txt	H9_ulti_ecl_peptides.txt	H9_ulti_ecl_proteinGroups.txt	H9_ulti_ecl_fragpipe_combined_ion.tsv	H9_ulti_ecl_fragpipe_combined_peptide.tsv	H9_ulti_ecl_fragpipe_combined_protein.tsv
A3_H_DDA_ulti_ecl_R2.raw	Round_robin_experiment	PYE3_A	H	DDA	ulti_ecl	2	MaxQuant;FragPipe		H3_ulti_ecl_evidence.txt	H3_ulti_ecl_peptides.txt	H3_ulti_ecl_proteinGroups.txt	H3_ulti_ecl_fragpipe_combined_ion.tsv	H3_ulti_ecl_fragpipe_combined_peptide.tsv	H3_ulti_ecl_fragpipe_combined_protein.tsv
B3_H_DDA_ulti_ecl_R2.raw	Round_robin_experiment	PYE3_B	H	DDA	ulti_ecl	2	MaxQuant;FragPipe		H3_ulti_ecl_evidence.txt	H3_ulti_ecl_peptides.txt	H3_ulti_ecl_proteinGroups.txt	H3_ulti_ecl_fragpipe_combined_ion.tsv	H3_ulti_ecl_fragpipe_combined_peptide.tsv	H3_ulti_ecl_fragpipe_combined_protein.tsv
A1_H_DDA_ulti_ecl_R2.raw	Round_robin_experiment	PYE1_A	H	DDA	ulti_ecl	2	MaxQuant;FragPipe		H1_ulti_ecl_evidence.txt	H1_ulti_ecl_peptides.txt	H1_ulti_ecl_proteinGroups.txt	H1_ulti_ecl_fragpipe_combined_ion.tsv	H1_ulti_ecl_fragpipe_combined_peptide.tsv	H1_ulti_ecl_fragpipe_combined_protein.tsv
B1_H_DDA_ulti_ecl_R2.raw	Round_robin_experiment	PYE1_B	H	DDA	ulti_ecl	2	MaxQuant;FragPipe		H1_ulti_ecl_evidence.txt	H1_ulti_ecl_peptides.txt	H1_ulti_ecl_proteinGroups.txt	H1_ulti_ecl_fragpipe_combined_ion.tsv	H1_ulti_ecl_fragpipe_combined_peptide.tsv	H1_ulti_ecl_fragpipe_combined_protein.tsv
A9_H_DDA_ulti_ecl_R3.raw	Round_robin_experiment	PYE9_A	H	DDA	ulti_ecl	3	MaxQuant;FragPipe		H9_ulti_ecl_evidence.txt	H9_ulti_ecl_peptides.txt	H9_ulti_ecl_proteinGroups.txt	H9_ulti_ecl_fragpipe_combined_ion.tsv	H9_ulti_ecl_fragpipe_combined_peptide.tsv	H9_ulti_ecl_fragpipe_combined_protein.tsv
B9_H_DDA_ulti_ecl_R3.raw	Round_robin_experiment	PYE9_B	H	DDA	ulti_ecl	3	MaxQuant;FragPipe		H9_ulti_ecl_evidence.txt	H9_ulti_ecl_peptides.txt	H9_ulti_ecl_proteinGroups.txt	H9_ulti_ecl_fragpipe_combined_ion.tsv	H9_ulti_ecl_fragpipe_combined_peptide.tsv	H9_ulti_ecl_fragpipe_combined_protein.tsv
A3_H_DDA_ulti_ecl_R3.raw	Round_robin_experiment	PYE3_A	H	DDA	ulti_ecl	3	MaxQuant;FragPipe		H3_ulti_ecl_evidence.txt	H3_ulti_ecl_peptides.txt	H3_ulti_ecl_proteinGroups.txt	H3_ulti_ecl_fragpipe_combined_ion.tsv	H3_ulti_ecl_fragpipe_combined_peptide.tsv	H3_ulti_ecl_fragpipe_combined_protein.tsv
B3_H_DDA_ulti_ecl_R3.raw	Round_robin_experiment	PYE3_B	H	DDA	ulti_ecl	3	MaxQuant;FragPipe		H3_ulti_ecl_evidence.txt	H3_ulti_ecl_peptides.txt	H3_ulti_ecl_proteinGroups.txt	H3_ulti_ecl_fragpipe_combined_ion.tsv	H3_ulti_ecl_fragpipe_combined_peptide.tsv	H3_ulti_ecl_fragpipe_combined_protein.tsv
A1_H_DDA_ulti_ecl_R3.raw	Round_robin_experiment	PYE1_A	H	DDA	ulti_ecl	3	MaxQuant;FragPipe		H1_ulti_ecl_evidence.txt	H1_ulti_ecl_peptides.txt	H1_ulti_ecl_proteinGroups.txt	H1_ulti_ecl_fragpipe_combined_ion.tsv	H1_ulti_ecl_fragpipe_combined_peptide.tsv	H1_ulti_ecl_fragpipe_combined_protein.tsv
B1_H_DDA_ulti_ecl_R3.raw	Round_robin_experiment	PYE1_B	H	DDA	ulti_ecl	3	MaxQuant;FragPipe		H1_ulti_ecl_evidence.txt	H1_ulti_ecl_peptides.txt	H1_ulti_ecl_proteinGroups.txt	H1_ulti_ecl_fragpipe_combined_ion.tsv	H1_ulti_ecl_fragpipe_combined_peptide.tsv	H1_ulti_ecl_fragpipe_combined_protein.tsv
A9_H_DDA_ulti_ecl_R4.raw	Round_robin_experiment	PYE9_A	H	DDA	ulti_ecl	4	MaxQuant;FragPipe		H9_ulti_ecl_evidence.txt	H9_ulti_ecl_peptides.txt	H9_ulti_ecl_proteinGroups.txt	H9_ulti_ecl_fragpipe_combined_ion.tsv	H9_ulti_ecl_fragpipe_combined_peptide.tsv	H9_ulti_ecl_fragpipe_combined_protein.tsv
B9_H_DDA_ulti_ecl_R4.raw	Round_robin_experiment	PYE9_B	H	DDA	ulti_ecl	4	MaxQuant;FragPipe		H9_ulti_ecl_evidence.txt	H9_ulti_ecl_peptides.txt	H9_ulti_ecl_proteinGroups.txt	H9_ulti_ecl_fragpipe_combined_ion.tsv	H9_ulti_ecl_fragpipe_combined_peptide.tsv	H9_ulti_ecl_fragpipe_combined_protein.tsv
A3_H_DDA_ulti_ecl_R4.raw	Round_robin_experiment	PYE3_A	H	DDA	ulti_ecl	4	MaxQuant;FragPipe		H3_ulti_ecl_evidence.txt	H3_ulti_ecl_peptides.txt	H3_ulti_ecl_proteinGroups.txt	H3_ulti_ecl_fragpipe_combined_ion.tsv	H3_ulti_ecl_fragpipe_combined_peptide.tsv	H3_ulti_ecl_fragpipe_combined_protein.tsv
B3_H_DDA_ulti_ecl_R4.raw	Round_robin_experiment	PYE3_B	H	DDA	ulti_ecl	4	MaxQuant;FragPipe		H3_ulti_ecl_evidence.txt	H3_ulti_ecl_peptides.txt	H3_ulti_ecl_proteinGroups.txt	H3_ulti_ecl_fragpipe_combined_ion.tsv	H3_ulti_ecl_fragpipe_combined_peptide.tsv	H3_ulti_ecl_fragpipe_combined_protein.tsv
A1_H_DDA_ulti_ecl_R4.raw	Round_robin_experiment	PYE1_A	H	DDA	ulti_ecl	4	MaxQuant;FragPipe		H1_ulti_ecl_evidence.txt	H1_ulti_ecl_peptides.txt	H1_ulti_ecl_proteinGroups.txt	H1_ulti_ecl_fragpipe_combined_ion.tsv	H1_ulti_ecl_fragpipe_combined_peptide.tsv	H1_ulti_ecl_fragpipe_combined_protein.tsv
B1_H_DDA_ulti_ecl_R4.raw	Round_robin_experiment	PYE1_B	H	DDA	ulti_ecl	4	MaxQuant;FragPipe		H1_ulti_ecl_evidence.txt	H1_ulti_ecl_peptides.txt	H1_ulti_ecl_proteinGroups.txt	H1_ulti_ecl_fragpipe_combined_ion.tsv	H1_ulti_ecl_fragpipe_combined_peptide.tsv	H1_ulti_ecl_fragpipe_combined_protein.tsv
A9_H_DDA_ulti_ecl_R5.raw	Round_robin_experiment	PYE9_A	H	DDA	ulti_ecl	5	MaxQuant;FragPipe		H9_ulti_ecl_evidence.txt	H9_ulti_ecl_peptides.txt	H9_ulti_ecl_proteinGroups.txt	H9_ulti_ecl_fragpipe_combined_ion.tsv	H9_ulti_ecl_fragpipe_combined_peptide.tsv	H9_ulti_ecl_fragpipe_combined_protein.tsv
B9_H_DDA_ulti_ecl_R5.raw	Round_robin_experiment	PYE9_B	H	DDA	ulti_ecl	5	MaxQuant;FragPipe		H9_ulti_ecl_evidence.txt	H9_ulti_ecl_peptides.txt	H9_ulti_ecl_proteinGroups.txt	H9_ulti_ecl_fragpipe_combined_ion.tsv	H9_ulti_ecl_fragpipe_combined_peptide.tsv	H9_ulti_ecl_fragpipe_combined_protein.tsv
A3_H_DDA_ulti_ecl_R5.raw	Round_robin_experiment	PYE3_A	H	DDA	ulti_ecl	5	MaxQuant;FragPipe		H3_ulti_ecl_evidence.txt	H3_ulti_ecl_peptides.txt	H3_ulti_ecl_proteinGroups.txt	H3_ulti_ecl_fragpipe_combined_ion.tsv	H3_ulti_ecl_fragpipe_combined_peptide.tsv	H3_ulti_ecl_fragpipe_combined_protein.tsv
B3_H_DDA_ulti_ecl_R5.raw	Round_robin_experiment	PYE3_B	H	DDA	ulti_ecl	5	MaxQuant;FragPipe		H3_ulti_ecl_evidence.txt	H3_ulti_ecl_peptides.txt	H3_ulti_ecl_proteinGroups.txt	H3_ulti_ecl_fragpipe_combined_ion.tsv	H3_ulti_ecl_fragpipe_combined_peptide.tsv	H3_ulti_ecl_fragpipe_combined_protein.tsv
A1_H_DDA_ulti_ecl_R5.raw	Round_robin_experiment	PYE1_A	H	DDA	ulti_ecl	5	MaxQuant;FragPipe		H1_ulti_ecl_evidence.txt	H1_ulti_ecl_peptides.txt	H1_ulti_ecl_proteinGroups.txt	H1_ulti_ecl_fragpipe_combined_ion.tsv	H1_ulti_ecl_fragpipe_combined_peptide.tsv	H1_ulti_ecl_fragpipe_combined_protein.tsv
B1_H_DDA_ulti_ecl_R5.raw	Round_robin_experiment	PYE1_B	H	DDA	ulti_ecl	5	MaxQuant;FragPipe		H1_ulti_ecl_evidence.txt	H1_ulti_ecl_peptides.txt	H1_ulti_ecl_proteinGroups.txt	H1_ulti_ecl_fragpipe_combined_ion.tsv	H1_ulti_ecl_fragpipe_combined_peptide.tsv	H1_ulti_ecl_fragpipe_combined_protein.tsv
A9_H_DDA_ulti_ecl_R6.raw	Round_robin_experiment	PYE9_A	H	DDA	ulti_ecl	6	MaxQuant;FragPipe		H9_ulti_ecl_evidence.txt	H9_ulti_ecl_peptides.txt	H9_ulti_ecl_proteinGroups.txt	H9_ulti_ecl_fragpipe_combined_ion.tsv	H9_ulti_ecl_fragpipe_combined_peptide.tsv	H9_ulti_ecl_fragpipe_combined_protein.tsv
B9_H_DDA_ulti_ecl_R6.raw	Round_robin_experiment	PYE9_B	H	DDA	ulti_ecl	6	MaxQuant;FragPipe		H9_ulti_ecl_evidence.txt	H9_ulti_ecl_peptides.txt	H9_ulti_ecl_proteinGroups.txt	H9_ulti_ecl_fragpipe_combined_ion.tsv	H9_ulti_ecl_fragpipe_combined_peptide.tsv	H9_ulti_ecl_fragpipe_combined_protein.tsv
A3_H_DDA_ulti_ecl_R6.raw	Round_robin_experiment	PYE3_A	H	DDA	ulti_ecl	6	MaxQuant;FragPipe		H3_ulti_ecl_evidence.txt	H3_ulti_ecl_peptides.txt	H3_ulti_ecl_proteinGroups.txt	H3_ulti_ecl_fragpipe_combined_ion.tsv	H3_ulti_ecl_fragpipe_combined_peptide.tsv	H3_ulti_ecl_fragpipe_combined_protein.tsv
B3_H_DDA_ulti_ecl_R6.raw	Round_robin_experiment	PYE3_B	H	DDA	ulti_ecl	6	MaxQuant;FragPipe		H3_ulti_ecl_evidence.txt	H3_ulti_ecl_peptides.txt	H3_ulti_ecl_proteinGroups.txt	H3_ulti_ecl_fragpipe_combined_ion.tsv	H3_ulti_ecl_fragpipe_combined_peptide.tsv	H3_ulti_ecl_fragpipe_combined_protein.tsv
A1_H_DDA_ulti_ecl_R6.raw	Round_robin_experiment	PYE1_A	H	DDA	ulti_ecl	6	MaxQuant;FragPipe		H1_ulti_ecl_evidence.txt	H1_ulti_ecl_peptides.txt	H1_ulti_ecl_proteinGroups.txt	H1_ulti_ecl_fragpipe_combined_ion.tsv	H1_ulti_ecl_fragpipe_combined_peptide.tsv	H1_ulti_ecl_fragpipe_combined_protein.tsv
B1_H_DDA_ulti_ecl_R6.raw	Round_robin_experiment	PYE1_B	H	DDA	ulti_ecl	6	MaxQuant;FragPipe		H1_ulti_ecl_evidence.txt	H1_ulti_ecl_peptides.txt	H1_ulti_ecl_proteinGroups.txt	H1_ulti_ecl_fragpipe_combined_ion.tsv	H1_ulti_ecl_fragpipe_combined_peptide.tsv	H1_ulti_ecl_fragpipe_combined_protein.tsv
A9_H_DDA_ulti_ex_R1.raw	Round_robin_experiment	PYE9_A	H	DDA	ulti_ex	1	MaxQuant;FragPipe		H9_ulti_ex_evidence.txt	H9_ulti_ex_peptides.txt	H9_ulti_ex_proteinGroups.txt	H9_ulti_ex_fragpipe_combined_ion.tsv	H9_ulti_ex_fragpipe_combined_peptide.tsv	H9_ulti_ex_fragpipe_combined_protein.tsv
A9_H_DIA_ulti_ex_R1.raw	Round_robin_experiment	PYE9_A	H	DIA	ulti_ex	1	DIANN;FragPipe	H9_ulti_ex_report.tsv							H9_ulti_ex_fragpipe_report.tsv
B9_H_DDA_ulti_ex_R1.raw	Round_robin_experiment	PYE9_B	H	DDA	ulti_ex	1	MaxQuant;FragPipe		H9_ulti_ex_evidence.txt	H9_ulti_ex_peptides.txt	H9_ulti_ex_proteinGroups.txt	H9_ulti_ex_fragpipe_combined_ion.tsv	H9_ulti_ex_fragpipe_combined_peptide.tsv	H9_ulti_ex_fragpipe_combined_protein.tsv
B9_H_DIA_ulti_ex_R1.raw	Round_robin_experiment	PYE9_B	H	DIA	ulti_ex	1	DIANN;FragPipe	H9_ulti_ex_report.tsv							H9_ulti_ex_fragpipe_report.tsv
A3_H_DDA_ulti_ex_R1.raw	Round_robin_experiment	PYE3_A	H	DDA	ulti_ex	1	MaxQuant;FragPipe		H3_ulti_ex_evidence.txt	H3_ulti_ex_peptides.txt	H3_ulti_ex_proteinGroups.txt	H3_ulti_ex_fragpipe_combined_ion.tsv	H3_ulti_ex_fragpipe_combined_peptide.tsv	H3_ulti_ex_fragpipe_combined_protein.tsv
A3_H_DIA_ulti_ex_R1.raw	Round_robin_experiment	PYE3_A	H	DIA	ulti_ex	1	DIANN;FragPipe	H3_ulti_ex_report.tsv							H3_ulti_ex_fragpipe_report.tsv
B3_H_DDA_ulti_ex_R1.raw	Round_robin_experiment	PYE3_B	H	DDA	ulti_ex	1	MaxQuant;FragPipe		H3_ulti_ex_evidence.txt	H3_ulti_ex_peptides.txt	H3_ulti_ex_proteinGroups.txt	H3_ulti_ex_fragpipe_combined_ion.tsv	H3_ulti_ex_fragpipe_combined_peptide.tsv	H3_ulti_ex_fragpipe_combined_protein.tsv
B3_H_DIA_ulti_ex_R1.raw	Round_robin_experiment	PYE3_B	H	DIA	ulti_ex	1	DIANN;FragPipe	H3_ulti_ex_report.tsv							H3_ulti_ex_fragpipe_report.tsv
A1_H_DDA_ulti_ex_R1.raw	Round_robin_experiment	PYE1_A	H	DDA	ulti_ex	1	MaxQuant;FragPipe		H1_ulti_ex_evidence.txt	H1_ulti_ex_peptides.txt	H1_ulti_ex_proteinGroups.txt	H1_ulti_ex_fragpipe_combined_ion.tsv	H1_ulti_ex_fragpipe_combined_peptide.tsv	H1_ulti_ex_fragpipe_combined_protein.tsv
A1_H_DIA_ulti_ex_R1.raw	Round_robin_experiment	PYE1_A	H	DIA	ulti_ex	1	DIANN;FragPipe	H1_ulti_ex_report.tsv							H1_ulti_ex_fragpipe_report.tsv
B1_H_DDA_ulti_ex_R1.raw	Round_robin_experiment	PYE1_B	H	DDA	ulti_ex	1	MaxQuant;FragPipe		H1_ulti_ex_evidence.txt	H1_ulti_ex_peptides.txt	H1_ulti_ex_proteinGroups.txt	H1_ulti_ex_fragpipe_combined_ion.tsv	H1_ulti_ex_fragpipe_combined_peptide.tsv	H1_ulti_ex_fragpipe_combined_protein.tsv
B1_H_DIA_ulti_ex_R1.raw	Round_robin_experiment	PYE1_B	H	DIA	ulti_ex	1	DIANN;FragPipe	H1_ulti_ex_report.tsv							H1_ulti_ex_fragpipe_report.tsv
A9_H_DDA_ulti_ex_R2.raw	Round_robin_experiment	PYE9_A	H	DDA	ulti_ex	2	MaxQuant;FragPipe		H9_ulti_ex_evidence.txt	H9_ulti_ex_peptides.txt	H9_ulti_ex_proteinGroups.txt	H9_ulti_ex_fragpipe_combined_ion.tsv	H9_ulti_ex_fragpipe_combined_peptide.tsv	H9_ulti_ex_fragpipe_combined_protein.tsv
A9_H_DIA_ulti_ex_R2.raw	Round_robin_experiment	PYE9_A	H	DIA	ulti_ex	2	DIANN;FragPipe	H9_ulti_ex_report.tsv							H9_ulti_ex_fragpipe_report.tsv
B9_H_DDA_ulti_ex_R2.raw	Round_robin_experiment	PYE9_B	H	DDA	ulti_ex	2	MaxQuant;FragPipe		H9_ulti_ex_evidence.txt	H9_ulti_ex_peptides.txt	H9_ulti_ex_proteinGroups.txt	H9_ulti_ex_fragpipe_combined_ion.tsv	H9_ulti_ex_fragpipe_combined_peptide.tsv	H9_ulti_ex_fragpipe_combined_protein.tsv
B9_H_DIA_ulti_ex_R2.raw	Round_robin_experiment	PYE9_B	H	DIA	ulti_ex	2	DIANN;FragPipe	H9_ulti_ex_report.tsv							H9_ulti_ex_fragpipe_report.tsv
A3_H_DDA_ulti_ex_R2.raw	Round_robin_experiment	PYE3_A	H	DDA	ulti_ex	2	MaxQuant;FragPipe		H3_ulti_ex_evidence.txt	H3_ulti_ex_peptides.txt	H3_ulti_ex_proteinGroups.txt	H3_ulti_ex_fragpipe_combined_ion.tsv	H3_ulti_ex_fragpipe_combined_peptide.tsv	H3_ulti_ex_fragpipe_combined_protein.tsv
A3_H_DIA_ulti_ex_R2.raw	Round_robin_experiment	PYE3_A	H	DIA	ulti_ex	2	DIANN;FragPipe	H3_ulti_ex_report.tsv							H3_ulti_ex_fragpipe_report.tsv
B3_H_DDA_ulti_ex_R2.raw	Round_robin_experiment	PYE3_B	H	DDA	ulti_ex	2	MaxQuant;FragPipe		H3_ulti_ex_evidence.txt	H3_ulti_ex_peptides.txt	H3_ulti_ex_proteinGroups.txt	H3_ulti_ex_fragpipe_combined_ion.tsv	H3_ulti_ex_fragpipe_combined_peptide.tsv	H3_ulti_ex_fragpipe_combined_protein.tsv
B3_H_DIA_ulti_ex_R2.raw	Round_robin_experiment	PYE3_B	H	DIA	ulti_ex	2	DIANN;FragPipe	H3_ulti_ex_report.tsv							H3_ulti_ex_fragpipe_report.tsv
A1_H_DDA_ulti_ex_R2.raw	Round_robin_experiment	PYE1_A	H	DDA	ulti_ex	2	MaxQuant;FragPipe		H1_ulti_ex_evidence.txt	H1_ulti_ex_peptides.txt	H1_ulti_ex_proteinGroups.txt	H1_ulti_ex_fragpipe_combined_ion.tsv	H1_ulti_ex_fragpipe_combined_peptide.tsv	H1_ulti_ex_fragpipe_combined_protein.tsv
A1_H_DIA_ulti_ex_R2.raw	Round_robin_experiment	PYE1_A	H	DIA	ulti_ex	2	DIANN;FragPipe	H1_ulti_ex_report.tsv							H1_ulti_ex_fragpipe_report.tsv
B1_H_DDA_ulti_ex_R2.raw	Round_robin_experiment	PYE1_B	H	DDA	ulti_ex	2	MaxQuant;FragPipe		H1_ulti_ex_evidence.txt	H1_ulti_ex_peptides.txt	H1_ulti_ex_proteinGroups.txt	H1_ulti_ex_fragpipe_combined_ion.tsv	H1_ulti_ex_fragpipe_combined_peptide.tsv	H1_ulti_ex_fragpipe_combined_protein.tsv
B1_H_DIA_ulti_ex_R2.raw	Round_robin_experiment	PYE1_B	H	DIA	ulti_ex	2	DIANN;FragPipe	H1_ulti_ex_report.tsv							H1_ulti_ex_fragpipe_report.tsv
A9_H_DDA_ulti_ex_R3.raw	Round_robin_experiment	PYE9_A	H	DDA	ulti_ex	3	MaxQuant;FragPipe		H9_ulti_ex_evidence.txt	H9_ulti_ex_peptides.txt	H9_ulti_ex_proteinGroups.txt	H9_ulti_ex_fragpipe_combined_ion.tsv	H9_ulti_ex_fragpipe_combined_peptide.tsv	H9_ulti_ex_fragpipe_combined_protein.tsv
A9_H_DIA_ulti_ex_R3.raw	Round_robin_experiment	PYE9_A	H	DIA	ulti_ex	3	DIANN;FragPipe	H9_ulti_ex_report.tsv							H9_ulti_ex_fragpipe_report.tsv
B9_H_DDA_ulti_ex_R3.raw	Round_robin_experiment	PYE9_B	H	DDA	ulti_ex	3	MaxQuant;FragPipe		H9_ulti_ex_evidence.txt	H9_ulti_ex_peptides.txt	H9_ulti_ex_proteinGroups.txt	H9_ulti_ex_fragpipe_combined_ion.tsv	H9_ulti_ex_fragpipe_combined_peptide.tsv	H9_ulti_ex_fragpipe_combined_protein.tsv
B9_H_DIA_ulti_ex_R3.raw	Round_robin_experiment	PYE9_B	H	DIA	ulti_ex	3	DIANN;FragPipe	H9_ulti_ex_report.tsv							H9_ulti_ex_fragpipe_report.tsv
A3_H_DDA_ulti_ex_R3.raw	Round_robin_experiment	PYE3_A	H	DDA	ulti_ex	3	MaxQuant;FragPipe		H3_ulti_ex_evidence.txt	H3_ulti_ex_peptides.txt	H3_ulti_ex_proteinGroups.txt	H3_ulti_ex_fragpipe_combined_ion.tsv	H3_ulti_ex_fragpipe_combined_peptide.tsv	H3_ulti_ex_fragpipe_combined_protein.tsv
A3_H_DIA_ulti_ex_R3.raw	Round_robin_experiment	PYE3_A	H	DIA	ulti_ex	3	DIANN;FragPipe	H3_ulti_ex_report.tsv							H3_ulti_ex_fragpipe_report.tsv
B3_H_DDA_ulti_ex_R3.raw	Round_robin_experiment	PYE3_B	H	DDA	ulti_ex	3	MaxQuant;FragPipe		H3_ulti_ex_evidence.txt	H3_ulti_ex_peptides.txt	H3_ulti_ex_proteinGroups.txt	H3_ulti_ex_fragpipe_combined_ion.tsv	H3_ulti_ex_fragpipe_combined_peptide.tsv	H3_ulti_ex_fragpipe_combined_protein.tsv
B3_H_DIA_ulti_ex_R3.raw	Round_robin_experiment	PYE3_B	H	DIA	ulti_ex	3	DIANN;FragPipe	H3_ulti_ex_report.tsv							H3_ulti_ex_fragpipe_report.tsv
A1_H_DDA_ulti_ex_R3.raw	Round_robin_experiment	PYE1_A	H	DDA	ulti_ex	3	MaxQuant;FragPipe		H1_ulti_ex_evidence.txt	H1_ulti_ex_peptides.txt	H1_ulti_ex_proteinGroups.txt	H1_ulti_ex_fragpipe_combined_ion.tsv	H1_ulti_ex_fragpipe_combined_peptide.tsv	H1_ulti_ex_fragpipe_combined_protein.tsv
A1_H_DIA_ulti_ex_R3.raw	Round_robin_experiment	PYE1_A	H	DIA	ulti_ex	3	DIANN;FragPipe	H1_ulti_ex_report.tsv							H1_ulti_ex_fragpipe_report.tsv
B1_H_DDA_ulti_ex_R3.raw	Round_robin_experiment	PYE1_B	H	DDA	ulti_ex	3	MaxQuant;FragPipe		H1_ulti_ex_evidence.txt	H1_ulti_ex_peptides.txt	H1_ulti_ex_proteinGroups.txt	H1_ulti_ex_fragpipe_combined_ion.tsv	H1_ulti_ex_fragpipe_combined_peptide.tsv	H1_ulti_ex_fragpipe_combined_protein.tsv
B1_H_DIA_ulti_ex_R3.raw	Round_robin_experiment	PYE1_B	H	DIA	ulti_ex	3	DIANN;FragPipe	H1_ulti_ex_report.tsv							H1_ulti_ex_fragpipe_report.tsv
A9_H_DDA_ulti_ex_R4.raw	Round_robin_experiment	PYE9_A	H	DDA	ulti_ex	4	MaxQuant;FragPipe		H9_ulti_ex_evidence.txt	H9_ulti_ex_peptides.txt	H9_ulti_ex_proteinGroups.txt	H9_ulti_ex_fragpipe_combined_ion.tsv	H9_ulti_ex_fragpipe_combined_peptide.tsv	H9_ulti_ex_fragpipe_combined_protein.tsv
A9_H_DIA_ulti_ex_R4.raw	Round_robin_experiment	PYE9_A	H	DIA	ulti_ex	4	DIANN;FragPipe	H9_ulti_ex_report.tsv							H9_ulti_ex_fragpipe_report.tsv
B9_H_DDA_ulti_ex_R4.raw	Round_robin_experiment	PYE9_B	H	DDA	ulti_ex	4	MaxQuant;FragPipe		H9_ulti_ex_evidence.txt	H9_ulti_ex_peptides.txt	H9_ulti_ex_proteinGroups.txt	H9_ulti_ex_fragpipe_combined_ion.tsv	H9_ulti_ex_fragpipe_combined_peptide.tsv	H9_ulti_ex_fragpipe_combined_protein.tsv
B9_H_DIA_ulti_ex_R4.raw	Round_robin_experiment	PYE9_B	H	DIA	ulti_ex	4	DIANN;FragPipe	H9_ulti_ex_report.tsv							H9_ulti_ex_fragpipe_report.tsv
A3_H_DDA_ulti_ex_R4.raw	Round_robin_experiment	PYE3_A	H	DDA	ulti_ex	4	MaxQuant;FragPipe		H3_ulti_ex_evidence.txt	H3_ulti_ex_peptides.txt	H3_ulti_ex_proteinGroups.txt	H3_ulti_ex_fragpipe_combined_ion.tsv	H3_ulti_ex_fragpipe_combined_peptide.tsv	H3_ulti_ex_fragpipe_combined_protein.tsv
A3_H_DIA_ulti_ex_R4.raw	Round_robin_experiment	PYE3_A	H	DIA	ulti_ex	4	DIANN;FragPipe	H3_ulti_ex_report.tsv							H3_ulti_ex_fragpipe_report.tsv
B3_H_DDA_ulti_ex_R4.raw	Round_robin_experiment	PYE3_B	H	DDA	ulti_ex	4	MaxQuant;FragPipe		H3_ulti_ex_evidence.txt	H3_ulti_ex_peptides.txt	H3_ulti_ex_proteinGroups.txt	H3_ulti_ex_fragpipe_combined_ion.tsv	H3_ulti_ex_fragpipe_combined_peptide.tsv	H3_ulti_ex_fragpipe_combined_protein.tsv
B3_H_DIA_ulti_ex_R4.raw	Round_robin_experiment	PYE3_B	H	DIA	ulti_ex	4	DIANN;FragPipe	H3_ulti_ex_report.tsv							H3_ulti_ex_fragpipe_report.tsv
A1_H_DDA_ulti_ex_R4.raw	Round_robin_experiment	PYE1_A	H	DDA	ulti_ex	4	MaxQuant;FragPipe		H1_ulti_ex_evidence.txt	H1_ulti_ex_peptides.txt	H1_ulti_ex_proteinGroups.txt	H1_ulti_ex_fragpipe_combined_ion.tsv	H1_ulti_ex_fragpipe_combined_peptide.tsv	H1_ulti_ex_fragpipe_combined_protein.tsv
A1_H_DIA_ulti_ex_R4.raw	Round_robin_experiment	PYE1_A	H	DIA	ulti_ex	4	DIANN;FragPipe	H1_ulti_ex_report.tsv							H1_ulti_ex_fragpipe_report.tsv
B1_H_DDA_ulti_ex_R4.raw	Round_robin_experiment	PYE1_B	H	DDA	ulti_ex	4	MaxQuant;FragPipe		H1_ulti_ex_evidence.txt	H1_ulti_ex_peptides.txt	H1_ulti_ex_proteinGroups.txt	H1_ulti_ex_fragpipe_combined_ion.tsv	H1_ulti_ex_fragpipe_combined_peptide.tsv	H1_ulti_ex_fragpipe_combined_protein.tsv
B1_H_DIA_ulti_ex_R4.raw	Round_robin_experiment	PYE1_B	H	DIA	ulti_ex	4	DIANN;FragPipe	H1_ulti_ex_report.tsv							H1_ulti_ex_fragpipe_report.tsv
A9_H_DDA_ulti_ex_R5.raw	Round_robin_experiment	PYE9_A	H	DDA	ulti_ex	5	MaxQuant;FragPipe		H9_ulti_ex_evidence.txt	H9_ulti_ex_peptides.txt	H9_ulti_ex_proteinGroups.txt	H9_ulti_ex_fragpipe_combined_ion.tsv	H9_ulti_ex_fragpipe_combined_peptide.tsv	H9_ulti_ex_fragpipe_combined_protein.tsv
A9_H_DIA_ulti_ex_R5.raw	Round_robin_experiment	PYE9_A	H	DIA	ulti_ex	5	DIANN;FragPipe	H9_ulti_ex_report.tsv							H9_ulti_ex_fragpipe_report.tsv
B9_H_DDA_ulti_ex_R5.raw	Round_robin_experiment	PYE9_B	H	DDA	ulti_ex	5	MaxQuant;FragPipe		H9_ulti_ex_evidence.txt	H9_ulti_ex_peptides.txt	H9_ulti_ex_proteinGroups.txt	H9_ulti_ex_fragpipe_combined_ion.tsv	H9_ulti_ex_fragpipe_combined_peptide.tsv	H9_ulti_ex_fragpipe_combined_protein.tsv
B9_H_DIA_ulti_ex_R5.raw	Round_robin_experiment	PYE9_B	H	DIA	ulti_ex	5	DIANN;FragPipe	H9_ulti_ex_report.tsv							H9_ulti_ex_fragpipe_report.tsv
A3_H_DDA_ulti_ex_R5.raw	Round_robin_experiment	PYE3_A	H	DDA	ulti_ex	5	MaxQuant;FragPipe		H3_ulti_ex_evidence.txt	H3_ulti_ex_peptides.txt	H3_ulti_ex_proteinGroups.txt	H3_ulti_ex_fragpipe_combined_ion.tsv	H3_ulti_ex_fragpipe_combined_peptide.tsv	H3_ulti_ex_fragpipe_combined_protein.tsv
A3_H_DIA_ulti_ex_R5.raw	Round_robin_experiment	PYE3_A	H	DIA	ulti_ex	5	DIANN;FragPipe	H3_ulti_ex_report.tsv							H3_ulti_ex_fragpipe_report.tsv
B3_H_DDA_ulti_ex_R5.raw	Round_robin_experiment	PYE3_B	H	DDA	ulti_ex	5	MaxQuant;FragPipe		H3_ulti_ex_evidence.txt	H3_ulti_ex_peptides.txt	H3_ulti_ex_proteinGroups.txt	H3_ulti_ex_fragpipe_combined_ion.tsv	H3_ulti_ex_fragpipe_combined_peptide.tsv	H3_ulti_ex_fragpipe_combined_protein.tsv
B3_H_DIA_ulti_ex_R5.raw	Round_robin_experiment	PYE3_B	H	DIA	ulti_ex	5	DIANN;FragPipe	H3_ulti_ex_report.tsv							H3_ulti_ex_fragpipe_report.tsv
A1_H_DDA_ulti_ex_R5.raw	Round_robin_experiment	PYE1_A	H	DDA	ulti_ex	5	MaxQuant;FragPipe		H1_ulti_ex_evidence.txt	H1_ulti_ex_peptides.txt	H1_ulti_ex_proteinGroups.txt	H1_ulti_ex_fragpipe_combined_ion.tsv	H1_ulti_ex_fragpipe_combined_peptide.tsv	H1_ulti_ex_fragpipe_combined_protein.tsv
A1_H_DIA_ulti_ex_R5.raw	Round_robin_experiment	PYE1_A	H	DIA	ulti_ex	5	DIANN;FragPipe	H1_ulti_ex_report.tsv							H1_ulti_ex_fragpipe_report.tsv
B1_H_DDA_ulti_ex_R5.raw	Round_robin_experiment	PYE1_B	H	DDA	ulti_ex	5	MaxQuant;FragPipe		H1_ulti_ex_evidence.txt	H1_ulti_ex_peptides.txt	H1_ulti_ex_proteinGroups.txt	H1_ulti_ex_fragpipe_combined_ion.tsv	H1_ulti_ex_fragpipe_combined_peptide.tsv	H1_ulti_ex_fragpipe_combined_protein.tsv
B1_H_DIA_ulti_ex_R5.raw	Round_robin_experiment	PYE1_B	H	DIA	ulti_ex	5	DIANN;FragPipe	H1_ulti_ex_report.tsv							H1_ulti_ex_fragpipe_report.tsv
A9_H_DDA_ulti_ex_R6.raw	Round_robin_experiment	PYE9_A	H	DDA	ulti_ex	6	MaxQuant;FragPipe		H9_ulti_ex_evidence.txt	H9_ulti_ex_peptides.txt	H9_ulti_ex_proteinGroups.txt	H9_ulti_ex_fragpipe_combined_ion.tsv	H9_ulti_ex_fragpipe_combined_peptide.tsv	H9_ulti_ex_fragpipe_combined_protein.tsv
A9_H_DIA_ulti_ex_R6.raw	Round_robin_experiment	PYE9_A	H	DIA	ulti_ex	6	DIANN;FragPipe	H9_ulti_ex_report.tsv							H9_ulti_ex_fragpipe_report.tsv
B9_H_DDA_ulti_ex_R6.raw	Round_robin_experiment	PYE9_B	H	DDA	ulti_ex	6	MaxQuant;FragPipe		H9_ulti_ex_evidence.txt	H9_ulti_ex_peptides.txt	H9_ulti_ex_proteinGroups.txt	H9_ulti_ex_fragpipe_combined_ion.tsv	H9_ulti_ex_fragpipe_combined_peptide.tsv	H9_ulti_ex_fragpipe_combined_protein.tsv
B9_H_DIA_ulti_ex_R6.raw	Round_robin_experiment	PYE9_B	H	DIA	ulti_ex	6	DIANN;FragPipe	H9_ulti_ex_report.tsv							H9_ulti_ex_fragpipe_report.tsv
A3_H_DDA_ulti_ex_R6.raw	Round_robin_experiment	PYE3_A	H	DDA	ulti_ex	6	MaxQuant;FragPipe		H3_ulti_ex_evidence.txt	H3_ulti_ex_peptides.txt	H3_ulti_ex_proteinGroups.txt	H3_ulti_ex_fragpipe_combined_ion.tsv	H3_ulti_ex_fragpipe_combined_peptide.tsv	H3_ulti_ex_fragpipe_combined_protein.tsv
A3_H_DIA_ulti_ex_R6.raw	Round_robin_experiment	PYE3_A	H	DIA	ulti_ex	6	DIANN;FragPipe	H3_ulti_ex_report.tsv							H3_ulti_ex_fragpipe_report.tsv
B3_H_DDA_ulti_ex_R6.raw	Round_robin_experiment	PYE3_B	H	DDA	ulti_ex	6	MaxQuant;FragPipe		H3_ulti_ex_evidence.txt	H3_ulti_ex_peptides.txt	H3_ulti_ex_proteinGroups.txt	H3_ulti_ex_fragpipe_combined_ion.tsv	H3_ulti_ex_fragpipe_combined_peptide.tsv	H3_ulti_ex_fragpipe_combined_protein.tsv
B3_H_DIA_ulti_ex_R6.raw	Round_robin_experiment	PYE3_B	H	DIA	ulti_ex	6	DIANN;FragPipe	H3_ulti_ex_report.tsv							H3_ulti_ex_fragpipe_report.tsv
A1_H_DDA_ulti_ex_R6.raw	Round_robin_experiment	PYE1_A	H	DDA	ulti_ex	6	MaxQuant;FragPipe		H1_ulti_ex_evidence.txt	H1_ulti_ex_peptides.txt	H1_ulti_ex_proteinGroups.txt	H1_ulti_ex_fragpipe_combined_ion.tsv	H1_ulti_ex_fragpipe_combined_peptide.tsv	H1_ulti_ex_fragpipe_combined_protein.tsv
A1_H_DIA_ulti_ex_R6.raw	Round_robin_experiment	PYE1_A	H	DIA	ulti_ex	6	DIANN;FragPipe	H1_ulti_ex_report.tsv							H1_ulti_ex_fragpipe_report.tsv
B1_H_DDA_ulti_ex_R6.raw	Round_robin_experiment	PYE1_B	H	DDA	ulti_ex	6	MaxQuant;FragPipe		H1_ulti_ex_evidence.txt	H1_ulti_ex_peptides.txt	H1_ulti_ex_proteinGroups.txt	H1_ulti_ex_fragpipe_combined_ion.tsv	H1_ulti_ex_fragpipe_combined_peptide.tsv	H1_ulti_ex_fragpipe_combined_protein.tsv
B1_H_DIA_ulti_ex_R6.raw	Round_robin_experiment	PYE1_B	H	DIA	ulti_ex	6	DIANN;FragPipe	H1_ulti_ex_report.tsv							H1_ulti_ex_fragpipe_report.tsv
A9_L_DIA_ulti_ex_FAIMS_R2.raw	Round_robin_experiment	PYE9_A	L	DIA	ulti_ex_FAIMS	2	DIANN;FragPipe	L9_ulti_ex_FAIMS_report.tsv							L9_ulti_ex_FAIMS_fragpipe_report.tsv
B9_L_DIA_ulti_ex_FAIMS_R2.raw	Round_robin_experiment	PYE9_B	L	DIA	ulti_ex_FAIMS	2	DIANN;FragPipe	L9_ulti_ex_FAIMS_report.tsv							L9_ulti_ex_FAIMS_fragpipe_report.tsv
A3_L_DIA_ulti_ex_FAIMS_R2.raw	Round_robin_experiment	PYE3_A	L	DIA	ulti_ex_FAIMS	2	DIANN;FragPipe	L3_ulti_ex_FAIMS_report.tsv							L3_ulti_ex_FAIMS_fragpipe_report.tsv
B3_L_DIA_ulti_ex_FAIMS_R2.raw	Round_robin_experiment	PYE3_B	L	DIA	ulti_ex_FAIMS	2	DIANN;FragPipe	L3_ulti_ex_FAIMS_report.tsv							L3_ulti_ex_FAIMS_fragpipe_report.tsv
A1_L_DIA_ulti_ex_FAIMS_R2.raw	Round_robin_experiment	PYE1_A	L	DIA	ulti_ex_FAIMS	2	DIANN;FragPipe	L1_ulti_ex_FAIMS_report.tsv							L1_ulti_ex_FAIMS_fragpipe_report.tsv
B1_L_DIA_ulti_ex_FAIMS_R2.raw	Round_robin_experiment	PYE1_B	L	DIA	ulti_ex_FAIMS	2	DIANN;FragPipe	L1_ulti_ex_FAIMS_report.tsv							L1_ulti_ex_FAIMS_fragpipe_report.tsv
A9_L_DIA_ulti_ex_FAIMS_R3.raw	Round_robin_experiment	PYE9_A	L	DIA	ulti_ex_FAIMS	3	DIANN;FragPipe	L9_ulti_ex_FAIMS_report.tsv							L9_ulti_ex_FAIMS_fragpipe_report.tsv
B9_L_DIA_ulti_ex_FAIMS_R3.raw	Round_robin_experiment	PYE9_B	L	DIA	ulti_ex_FAIMS	3	DIANN;FragPipe	L9_ulti_ex_FAIMS_report.tsv							L9_ulti_ex_FAIMS_fragpipe_report.tsv
A3_L_DIA_ulti_ex_FAIMS_R3.raw	Round_robin_experiment	PYE3_A	L	DIA	ulti_ex_FAIMS	3	DIANN;FragPipe	L3_ulti_ex_FAIMS_report.tsv							L3_ulti_ex_FAIMS_fragpipe_report.tsv
B3_L_DIA_ulti_ex_FAIMS_R3.raw	Round_robin_experiment	PYE3_B	L	DIA	ulti_ex_FAIMS	3	DIANN;FragPipe	L3_ulti_ex_FAIMS_report.tsv							L3_ulti_ex_FAIMS_fragpipe_report.tsv
A1_L_DIA_ulti_ex_FAIMS_R3.raw	Round_robin_experiment	PYE1_A	L	DIA	ulti_ex_FAIMS	3	DIANN;FragPipe	L1_ulti_ex_FAIMS_report.tsv							L1_ulti_ex_FAIMS_fragpipe_report.tsv
B1_L_DIA_ulti_ex_FAIMS_R3.raw	Round_robin_experiment	PYE1_B	L	DIA	ulti_ex_FAIMS	3	DIANN;FragPipe	L1_ulti_ex_FAIMS_report.tsv							L1_ulti_ex_FAIMS_fragpipe_report.tsv
A9_L_DIA_ulti_ex_FAIMS_R1.raw	Round_robin_experiment	PYE9_A	L	DIA	ulti_ex_FAIMS	1	DIANN;FragPipe	L9_ulti_ex_FAIMS_report.tsv							L9_ulti_ex_FAIMS_fragpipe_report.tsv
B9_L_DIA_ulti_ex_FAIMS_R1.raw	Round_robin_experiment	PYE9_B	L	DIA	ulti_ex_FAIMS	1	DIANN;FragPipe	L9_ulti_ex_FAIMS_report.tsv							L9_ulti_ex_FAIMS_fragpipe_report.tsv
A3_L_DIA_ulti_ex_FAIMS_R1.raw	Round_robin_experiment	PYE3_A	L	DIA	ulti_ex_FAIMS	1	DIANN;FragPipe	L3_ulti_ex_FAIMS_report.tsv							L3_ulti_ex_FAIMS_fragpipe_report.tsv
B3_L_DIA_ulti_ex_FAIMS_R1.raw	Round_robin_experiment	PYE3_B	L	DIA	ulti_ex_FAIMS	1	DIANN;FragPipe	L3_ulti_ex_FAIMS_report.tsv							L3_ulti_ex_FAIMS_fragpipe_report.tsv
A1_L_DIA_ulti_ex_FAIMS_R1.raw	Round_robin_experiment	PYE1_A	L	DIA	ulti_ex_FAIMS	1	DIANN;FragPipe	L1_ulti_ex_FAIMS_report.tsv							L1_ulti_ex_FAIMS_fragpipe_report.tsv
B1_L_DIA_ulti_ex_FAIMS_R1.raw	Round_robin_experiment	PYE1_B	L	DIA	ulti_ex_FAIMS	1	DIANN;FragPipe	L1_ulti_ex_FAIMS_report.tsv							L1_ulti_ex_FAIMS_fragpipe_report.tsv
A1_L_DIA_ulti_ex_R1.raw	Round_robin_experiment	PYE1_A	L	DIA	ulti_ex	1	DIANN;FragPipe	L1_ulti_ex_report.tsv							L1_ulti_ex_fragpipe_report.tsv
B1_L_DIA_ulti_ex_R1.raw	Round_robin_experiment	PYE1_B	L	DIA	ulti_ex	1	DIANN;FragPipe	L1_ulti_ex_report.tsv							L1_ulti_ex_fragpipe_report.tsv
A3_L_DIA_ulti_ex_R1.raw	Round_robin_experiment	PYE3_A	L	DIA	ulti_ex	1	DIANN;FragPipe	L3_ulti_ex_report.tsv							L3_ulti_ex_fragpipe_report.tsv
B3_L_DIA_ulti_ex_R1.raw	Round_robin_experiment	PYE3_B	L	DIA	ulti_ex	1	DIANN;FragPipe	L3_ulti_ex_report.tsv							L3_ulti_ex_fragpipe_report.tsv
A9_L_DIA_ulti_ex_R1.raw	Round_robin_experiment	PYE9_A	L	DIA	ulti_ex	1	DIANN;FragPipe	L9_ulti_ex_report.tsv							L9_ulti_ex_fragpipe_report.tsv
B9_L_DIA_ulti_ex_R1.raw	Round_robin_experiment	PYE9_B	L	DIA	ulti_ex	1	DIANN;FragPipe	L9_ulti_ex_report.tsv							L9_ulti_ex_fragpipe_report.tsv
A1_L_DIA_ulti_ex_R2.raw	Round_robin_experiment	PYE1_A	L	DIA	ulti_ex	2	DIANN;FragPipe	L1_ulti_ex_report.tsv							L1_ulti_ex_fragpipe_report.tsv
B1_L_DIA_ulti_ex_R2.raw	Round_robin_experiment	PYE1_B	L	DIA	ulti_ex	2	DIANN;FragPipe	L1_ulti_ex_report.tsv							L1_ulti_ex_fragpipe_report.tsv
A3_L_DIA_ulti_ex_R2.raw	Round_robin_experiment	PYE3_A	L	DIA	ulti_ex	2	DIANN;FragPipe	L3_ulti_ex_report.tsv							L3_ulti_ex_fragpipe_report.tsv
B3_L_DIA_ulti_ex_R2.raw	Round_robin_experiment	PYE3_B	L	DIA	ulti_ex	2	DIANN;FragPipe	L3_ulti_ex_report.tsv							L3_ulti_ex_fragpipe_report.tsv
A9_L_DIA_ulti_ex_R2.raw	Round_robin_experiment	PYE9_A	L	DIA	ulti_ex	2	DIANN;FragPipe	L9_ulti_ex_report.tsv							L9_ulti_ex_fragpipe_report.tsv
B9_L_DIA_ulti_ex_R2.raw	Round_robin_experiment	PYE9_B	L	DIA	ulti_ex	2	DIANN;FragPipe	L9_ulti_ex_report.tsv							L9_ulti_ex_fragpipe_report.tsv
A1_L_DIA_ulti_ex_R3.raw	Round_robin_experiment	PYE1_A	L	DIA	ulti_ex	3	DIANN;FragPipe	L1_ulti_ex_report.tsv							L1_ulti_ex_fragpipe_report.tsv
B1_L_DIA_ulti_ex_R3.raw	Round_robin_experiment	PYE1_B	L	DIA	ulti_ex	3	DIANN;FragPipe	L1_ulti_ex_report.tsv							L1_ulti_ex_fragpipe_report.tsv
A3_L_DIA_ulti_ex_R3.raw	Round_robin_experiment	PYE3_A	L	DIA	ulti_ex	3	DIANN;FragPipe	L3_ulti_ex_report.tsv							L3_ulti_ex_fragpipe_report.tsv
B3_L_DIA_ulti_ex_R3.raw	Round_robin_experiment	PYE3_B	L	DIA	ulti_ex	3	DIANN;FragPipe	L3_ulti_ex_report.tsv							L3_ulti_ex_fragpipe_report.tsv
A9_L_DIA_ulti_ex_R3.raw	Round_robin_experiment	PYE9_A	L	DIA	ulti_ex	3	DIANN;FragPipe	L9_ulti_ex_report.tsv							L9_ulti_ex_fragpipe_report.tsv
B9_L_DIA_ulti_ex_R3.raw	Round_robin_experiment	PYE9_B	L	DIA	ulti_ex	3	DIANN;FragPipe	L9_ulti_ex_report.tsv							L9_ulti_ex_fragpipe_report.tsv
G250430_026_Slot2-11_1_17830.d	Extended_analysis_method_transfer	PYE1_A	L	DIA	nE-tTOF_site_G_LCMS_config	1	DIANN	L_nE-tTOF_site_G_LCMS_config_PYE1_report.tsv
G250430_027_Slot2-12_1_17831.d	Extended_analysis_method_transfer	PYE1_B	L	DIA	nE-tTOF_site_G_LCMS_config	1	DIANN	L_nE-tTOF_site_G_LCMS_config_PYE1_report.tsv
G250430_028_Slot2-11_1_17832.d	Extended_analysis_method_transfer	PYE1_A	L	DIA	nE-tTOF_site_G_LCMS_config	2	DIANN	L_nE-tTOF_site_G_LCMS_config_PYE1_report.tsv
G250430_029_Slot2-12_1_17833.d	Extended_analysis_method_transfer	PYE1_B	L	DIA	nE-tTOF_site_G_LCMS_config	2	DIANN	L_nE-tTOF_site_G_LCMS_config_PYE1_report.tsv
G250430_030_Slot2-11_1_17834.d	Extended_analysis_method_transfer	PYE1_A	L	DIA	nE-tTOF_site_G_LCMS_config	3	DIANN	L_nE-tTOF_site_G_LCMS_config_PYE1_report.tsv
G250430_031_Slot2-12_1_17835.d	Extended_analysis_method_transfer	PYE1_B	L	DIA	nE-tTOF_site_G_LCMS_config	3	DIANN	L_nE-tTOF_site_G_LCMS_config_PYE1_report.tsv
G250430_036_Slot2-11_1_17840.d	Extended_analysis_method_transfer	PYE1_A	L	DIA	nE-tTOF_site_G_LCMS_config	4	DIANN	L_nE-tTOF_site_G_LCMS_config_PYE1_report.tsv
G250430_037_Slot2-12_1_17841.d	Extended_analysis_method_transfer	PYE1_B	L	DIA	nE-tTOF_site_G_LCMS_config	4	DIANN	L_nE-tTOF_site_G_LCMS_config_PYE1_report.tsv
G250430_038_Slot2-11_1_17842.d	Extended_analysis_method_transfer	PYE1_A	L	DIA	nE-tTOF_site_G_LCMS_config	5	DIANN	L_nE-tTOF_site_G_LCMS_config_PYE1_report.tsv
G250430_039_Slot2-12_1_17843.d	Extended_analysis_method_transfer	PYE1_B	L	DIA	nE-tTOF_site_G_LCMS_config	5	DIANN	L_nE-tTOF_site_G_LCMS_config_PYE1_report.tsv
G250430_040_Slot2-11_1_17844.d	Extended_analysis_method_transfer	PYE1_A	L	DIA	nE-tTOF_site_G_LCMS_config	6	DIANN	L_nE-tTOF_site_G_LCMS_config_PYE1_report.tsv
G250430_041_Slot2-12_1_17845.d	Extended_analysis_method_transfer	PYE1_B	L	DIA	nE-tTOF_site_G_LCMS_config	6	DIANN	L_nE-tTOF_site_G_LCMS_config_PYE1_report.tsv
G250506_058_Slot2-11_1_17951.d	Extended_analysis_method_transfer	PYE1_A	L	DIA	nE-tTOF_site_G_MS_config	1	DIANN	L_nE-tTOF_site_G_MS_config_PYE1_report.tsv
G250506_059_Slot2-12_1_17952.d	Extended_analysis_method_transfer	PYE1_B	L	DIA	nE-tTOF_site_G_MS_config	1	DIANN	L_nE-tTOF_site_G_MS_config_PYE1_report.tsv
G250506_060_Slot2-11_1_17953.d	Extended_analysis_method_transfer	PYE1_A	L	DIA	nE-tTOF_site_G_MS_config	2	DIANN	L_nE-tTOF_site_G_MS_config_PYE1_report.tsv
G250506_061_Slot2-12_1_17954.d	Extended_analysis_method_transfer	PYE1_B	L	DIA	nE-tTOF_site_G_MS_config	2	DIANN	L_nE-tTOF_site_G_MS_config_PYE1_report.tsv
G250506_062_Slot2-11_1_17955.d	Extended_analysis_method_transfer	PYE1_A	L	DIA	nE-tTOF_site_G_MS_config	3	DIANN	L_nE-tTOF_site_G_MS_config_PYE1_report.tsv
G250506_063_Slot2-12_1_17956.d	Extended_analysis_method_transfer	PYE1_B	L	DIA	nE-tTOF_site_G_MS_config	3	DIANN	L_nE-tTOF_site_G_MS_config_PYE1_report.tsv
G250506_068_Slot2-11_1_17961.d	Extended_analysis_method_transfer	PYE1_A	L	DIA	nE-tTOF_site_G_MS_config	4	DIANN	L_nE-tTOF_site_G_MS_config_PYE1_report.tsv
G250506_069_Slot2-12_1_17962.d	Extended_analysis_method_transfer	PYE1_B	L	DIA	nE-tTOF_site_G_MS_config	4	DIANN	L_nE-tTOF_site_G_MS_config_PYE1_report.tsv
G250506_070_Slot2-11_1_17963.d	Extended_analysis_method_transfer	PYE1_A	L	DIA	nE-tTOF_site_G_MS_config	5	DIANN	L_nE-tTOF_site_G_MS_config_PYE1_report.tsv
G250506_071_Slot2-12_1_17964.d	Extended_analysis_method_transfer	PYE1_B	L	DIA	nE-tTOF_site_G_MS_config	5	DIANN	L_nE-tTOF_site_G_MS_config_PYE1_report.tsv
G250506_072_Slot2-11_1_17965.d	Extended_analysis_method_transfer	PYE1_A	L	DIA	nE-tTOF_site_G_MS_config	6	DIANN	L_nE-tTOF_site_G_MS_config_PYE1_report.tsv
G250506_073_Slot2-12_1_17966.d	Extended_analysis_method_transfer	PYE1_B	L	DIA	nE-tTOF_site_G_MS_config	6	DIANN	L_nE-tTOF_site_G_MS_config_PYE1_report.tsv
G250506_038_Slot2-11_1_17931.d	Extended_analysis_method_transfer	PYE1_A	L	DIA	nE-tTOF	1	DIANN	L_nE-tTOF_PYE1_report.tsv
G250506_039_Slot2-12_1_17932.d	Extended_analysis_method_transfer	PYE1_B	L	DIA	nE-tTOF	1	DIANN	L_nE-tTOF_PYE1_report.tsv
G250506_040_Slot2-11_1_17933.d	Extended_analysis_method_transfer	PYE1_A	L	DIA	nE-tTOF	2	DIANN	L_nE-tTOF_PYE1_report.tsv
G250506_041_Slot2-12_1_17934.d	Extended_analysis_method_transfer	PYE1_B	L	DIA	nE-tTOF	2	DIANN	L_nE-tTOF_PYE1_report.tsv
G250506_042_Slot2-11_1_17935.d	Extended_analysis_method_transfer	PYE1_A	L	DIA	nE-tTOF	3	DIANN	L_nE-tTOF_PYE1_report.tsv
G250506_043_Slot2-12_1_17936.d	Extended_analysis_method_transfer	PYE1_B	L	DIA	nE-tTOF	3	DIANN	L_nE-tTOF_PYE1_report.tsv
G250506_048_Slot2-11_1_17941.d	Extended_analysis_method_transfer	PYE1_A	L	DIA	nE-tTOF	4	DIANN	L_nE-tTOF_PYE1_report.tsv
G250506_049_Slot2-12_1_17942.d	Extended_analysis_method_transfer	PYE1_B	L	DIA	nE-tTOF	4	DIANN	L_nE-tTOF_PYE1_report.tsv
G250506_050_Slot2-11_1_17943.d	Extended_analysis_method_transfer	PYE1_A	L	DIA	nE-tTOF	5	DIANN	L_nE-tTOF_PYE1_report.tsv
G250506_051_Slot2-12_1_17944.d	Extended_analysis_method_transfer	PYE1_B	L	DIA	nE-tTOF	5	DIANN	L_nE-tTOF_PYE1_report.tsv
G250506_052_Slot2-11_1_17945.d	Extended_analysis_method_transfer	PYE1_A	L	DIA	nE-tTOF	6	DIANN	L_nE-tTOF_PYE1_report.tsv
G250506_053_Slot2-12_1_17946.d	Extended_analysis_method_transfer	PYE1_B	L	DIA	nE-tTOF	6	DIANN	L_nE-tTOF_PYE1_report.tsv
V250515_018.raw	Extended_analysis_method_transfer	PYE1_A	L	DIA	ulti_ex_site_G_LCMS_config	1	DIANN	L_ulti_ex_site_G_LCMS_config_PYE1_report.tsv
V250515_019.raw	Extended_analysis_method_transfer	PYE1_B	L	DIA	ulti_ex_site_G_LCMS_config	1	DIANN	L_ulti_ex_site_G_LCMS_config_PYE1_report.tsv
V250515_020.raw	Extended_analysis_method_transfer	PYE1_A	L	DIA	ulti_ex_site_G_LCMS_config	2	DIANN	L_ulti_ex_site_G_LCMS_config_PYE1_report.tsv
V250515_021.raw	Extended_analysis_method_transfer	PYE1_B	L	DIA	ulti_ex_site_G_LCMS_config	2	DIANN	L_ulti_ex_site_G_LCMS_config_PYE1_report.tsv
V250515_022.raw	Extended_analysis_method_transfer	PYE1_A	L	DIA	ulti_ex_site_G_LCMS_config	3	DIANN	L_ulti_ex_site_G_LCMS_config_PYE1_report.tsv
V250515_023.raw	Extended_analysis_method_transfer	PYE1_B	L	DIA	ulti_ex_site_G_LCMS_config	3	DIANN	L_ulti_ex_site_G_LCMS_config_PYE1_report.tsv
V250515_029.raw	Extended_analysis_method_transfer	PYE1_A	L	DIA	ulti_ex_site_G_LCMS_config	4	DIANN	L_ulti_ex_site_G_LCMS_config_PYE1_report.tsv
V250515_030.raw	Extended_analysis_method_transfer	PYE1_B	L	DIA	ulti_ex_site_G_LCMS_config	4	DIANN	L_ulti_ex_site_G_LCMS_config_PYE1_report.tsv
V250515_031.raw	Extended_analysis_method_transfer	PYE1_A	L	DIA	ulti_ex_site_G_LCMS_config	5	DIANN	L_ulti_ex_site_G_LCMS_config_PYE1_report.tsv
V250515_032.raw	Extended_analysis_method_transfer	PYE1_B	L	DIA	ulti_ex_site_G_LCMS_config	5	DIANN	L_ulti_ex_site_G_LCMS_config_PYE1_report.tsv
V250515_033.raw	Extended_analysis_method_transfer	PYE1_A	L	DIA	ulti_ex_site_G_LCMS_config	6	DIANN	L_ulti_ex_site_G_LCMS_config_PYE1_report.tsv
V250515_034.raw	Extended_analysis_method_transfer	PYE1_B	L	DIA	ulti_ex_site_G_LCMS_config	6	DIANN	L_ulti_ex_site_G_LCMS_config_PYE1_report.tsv
V250515_061.raw	Extended_analysis_method_transfer	PYE1_A	L	DIA	ulti_ex_site_H_LCMS_config	1	DIANN	L_ulti_ex_site_H_LCMS_config_PYE1_report.tsv
V250515_062.raw	Extended_analysis_method_transfer	PYE1_B	L	DIA	ulti_ex_site_H_LCMS_config	1	DIANN	L_ulti_ex_site_H_LCMS_config_PYE1_report.tsv
V250515_063.raw	Extended_analysis_method_transfer	PYE1_A	L	DIA	ulti_ex_site_H_LCMS_config	2	DIANN	L_ulti_ex_site_H_LCMS_config_PYE1_report.tsv
V250515_064.raw	Extended_analysis_method_transfer	PYE1_B	L	DIA	ulti_ex_site_H_LCMS_config	2	DIANN	L_ulti_ex_site_H_LCMS_config_PYE1_report.tsv
V250515_065.raw	Extended_analysis_method_transfer	PYE1_A	L	DIA	ulti_ex_site_H_LCMS_config	3	DIANN	L_ulti_ex_site_H_LCMS_config_PYE1_report.tsv
V250515_066.raw	Extended_analysis_method_transfer	PYE1_B	L	DIA	ulti_ex_site_H_LCMS_config	3	DIANN	L_ulti_ex_site_H_LCMS_config_PYE1_report.tsv
V250515_070.raw	Extended_analysis_method_transfer	PYE1_A	L	DIA	ulti_ex_site_H_LCMS_config	4	DIANN	L_ulti_ex_site_H_LCMS_config_PYE1_report.tsv
V250515_071.raw	Extended_analysis_method_transfer	PYE1_B	L	DIA	ulti_ex_site_H_LCMS_config	4	DIANN	L_ulti_ex_site_H_LCMS_config_PYE1_report.tsv
V250515_072.raw	Extended_analysis_method_transfer	PYE1_A	L	DIA	ulti_ex_site_H_LCMS_config	5	DIANN	L_ulti_ex_site_H_LCMS_config_PYE1_report.tsv
V250515_073.raw	Extended_analysis_method_transfer	PYE1_B	L	DIA	ulti_ex_site_H_LCMS_config	5	DIANN	L_ulti_ex_site_H_LCMS_config_PYE1_report.tsv
V250515_074.raw	Extended_analysis_method_transfer	PYE1_A	L	DIA	ulti_ex_site_H_LCMS_config	6	DIANN	L_ulti_ex_site_H_LCMS_config_PYE1_report.tsv
V250515_075.raw	Extended_analysis_method_transfer	PYE1_B	L	DIA	ulti_ex_site_H_LCMS_config	6	DIANN	L_ulti_ex_site_H_LCMS_config_PYE1_report.tsv
oecf4_20250430_KA_NeatPlasma_2025_067_Exploris_DIA_R1.raw	Extended_analysis_neat_plasma	Neat_plasma	G	DIA	ulti-ex	1	DIANN	G_ulti-ex_neat_plasma_report.tsv
oecf4_20250430_KA_NeatPlasma_2025_067_Exploris_DIA_R2.raw	Extended_analysis_neat_plasma	Neat_plasma	G	DIA	ulti-ex	2	DIANN	G_ulti-ex_neat_plasma_report.tsv
oecf4_20250430_KA_NeatPlasma_2025_067_Exploris_DIA_R3.raw	Extended_analysis_neat_plasma	Neat_plasma	G	DIA	ulti-ex	3	DIANN	G_ulti-ex_neat_plasma_report.tsv
oecf4_20250430_KA_NeatPlasma_2025_067_Exploris_DIA_R4.raw	Extended_analysis_neat_plasma	Neat_plasma	G	DIA	ulti-ex	4	DIANN	G_ulti-ex_neat_plasma_report.tsv
oecf4_20250430_KA_NeatPlasma_2025_067_Exploris_DIA_R5.raw	Extended_analysis_neat_plasma	Neat_plasma	G	DIA	ulti-ex	5	DIANN	G_ulti-ex_neat_plasma_report.tsv
oecf4_20250430_KA_NeatPlasma_2025_067_Exploris_DIA_R6.raw	Extended_analysis_neat_plasma	Neat_plasma	G	DIA	ulti-ex	6	DIANN	G_ulti-ex_neat_plasma_report.tsv
OTEC_250425_19-410_FG_SC022_Plasma_H_DIA_ultimate_eclipse_R1.raw	Extended_analysis_neat_plasma	Neat_plasma	H	DIA	ulti-ecl	1	DIANN	H_ulti-ecl_neat_plasma_report.tsv
OTEC_250425_19-410_FG_SC022_Plasma_H_DIA_ultimate_eclipse_R2.raw	Extended_analysis_neat_plasma	Neat_plasma	H	DIA	ulti-ecl	2	DIANN	H_ulti-ecl_neat_plasma_report.tsv
OTEC_250425_19-410_FG_SC022_Plasma_H_DIA_ultimate_eclipse_R3.raw	Extended_analysis_neat_plasma	Neat_plasma	H	DIA	ulti-ecl	3	DIANN	H_ulti-ecl_neat_plasma_report.tsv
OTEC_250425_19-410_FG_SC022_Plasma_H_DIA_ultimate_eclipse_R4.raw	Extended_analysis_neat_plasma	Neat_plasma	H	DIA	ulti-ecl	4	DIANN	H_ulti-ecl_neat_plasma_report.tsv
OTEC_250425_19-410_FG_SC022_Plasma_H_DIA_ultimate_eclipse_R5.raw	Extended_analysis_neat_plasma	Neat_plasma	H	DIA	ulti-ecl	5	DIANN	H_ulti-ecl_neat_plasma_report.tsv
OTEC_250425_19-410_FG_SC022_Plasma_H_DIA_ultimate_eclipse_R6.raw	Extended_analysis_neat_plasma	Neat_plasma	H	DIA	ulti-ecl	6	DIANN	H_ulti-ecl_neat_plasma_report.tsv
SMART-OTEX_250430_FG-SC022_05_Plasma_H_DIA_ultimate_exploris_R1.raw	Extended_analysis_neat_plasma	Neat_plasma	H	DIA	ulti-ex	1	DIANN	H_ulti-ex_neat_plasma_report.tsv
SMART-OTEX_250430_FG-SC022_06_Plasma_H_DIA_ultimate_exploris_R2.raw	Extended_analysis_neat_plasma	Neat_plasma	H	DIA	ulti-ex	2	DIANN	H_ulti-ex_neat_plasma_report.tsv
SMART-OTEX_250430_FG-SC022_07_Plasma_H_DIA_ultimate_exploris_R3.raw	Extended_analysis_neat_plasma	Neat_plasma	H	DIA	ulti-ex	3	DIANN	H_ulti-ex_neat_plasma_report.tsv
SMART-OTEX_250430_FG-SC022_08_Plasma_H_DIA_ultimate_exploris_R4.raw	Extended_analysis_neat_plasma	Neat_plasma	H	DIA	ulti-ex	4	DIANN	H_ulti-ex_neat_plasma_report.tsv
SMART-OTEX_250430_FG-SC022_09_Plasma_H_DIA_ultimate_exploris_R5.raw	Extended_analysis_neat_plasma	Neat_plasma	H	DIA	ulti-ex	5	DIANN	H_ulti-ex_neat_plasma_report.tsv
SMART-OTEX_250430_FG-SC022_10_Plasma_H_DIA_ultimate_exploris_R6.raw	Extended_analysis_neat_plasma	Neat_plasma	H	DIA	ulti-ex	6	DIANN	H_ulti-ex_neat_plasma_report.tsv
V250423_010.raw	Extended_analysis_neat_plasma	Neat_plasma	L	DIA	ulti-ex	1	DIANN	L_ulti-ex_neat_plasma_report.tsv
V250423_011.raw	Extended_analysis_neat_plasma	Neat_plasma	L	DIA	ulti-ex	2	DIANN	L_ulti-ex_neat_plasma_report.tsv
V250423_012.raw	Extended_analysis_neat_plasma	Neat_plasma	L	DIA	ulti-ex	3	DIANN	L_ulti-ex_neat_plasma_report.tsv
V250423_013.raw	Extended_analysis_neat_plasma	Neat_plasma	L	DIA	ulti-ex	4	DIANN	L_ulti-ex_neat_plasma_report.tsv
V250423_014.raw	Extended_analysis_neat_plasma	Neat_plasma	L	DIA	ulti-ex	5	DIANN	L_ulti-ex_neat_plasma_report.tsv
V250423_015.raw	Extended_analysis_neat_plasma	Neat_plasma	L	DIA	ulti-ex	6	DIANN	L_ulti-ex_neat_plasma_report.tsv
V250515_007.raw	Extended_analysis_neat_plasma	Neat_plasma	L	DIA	ulti-ex_site_G_LCMS_config	1	DIANN	L_ulti-ex_site_G_LCMS_config_neat_plasma_report.tsv
V250515_008.raw	Extended_analysis_neat_plasma	Neat_plasma	L	DIA	ulti-ex_site_G_LCMS_config	2	DIANN	L_ulti-ex_site_G_LCMS_config_neat_plasma_report.tsv
V250515_009.raw	Extended_analysis_neat_plasma	Neat_plasma	L	DIA	ulti-ex_site_G_LCMS_config	3	DIANN	L_ulti-ex_site_G_LCMS_config_neat_plasma_report.tsv
V250515_010.raw	Extended_analysis_neat_plasma	Neat_plasma	L	DIA	ulti-ex_site_G_LCMS_config	4	DIANN	L_ulti-ex_site_G_LCMS_config_neat_plasma_report.tsv
V250515_011.raw	Extended_analysis_neat_plasma	Neat_plasma	L	DIA	ulti-ex_site_G_LCMS_config	5	DIANN	L_ulti-ex_site_G_LCMS_config_neat_plasma_report.tsv
V250515_012.raw	Extended_analysis_neat_plasma	Neat_plasma	L	DIA	ulti-ex_site_G_LCMS_config	6	DIANN	L_ulti-ex_site_G_LCMS_config_neat_plasma_report.tsv
V250515_052.raw	Extended_analysis_neat_plasma	Neat_plasma	L	DIA	ulti-ex_site_H_LCMS_config	1	DIANN	L_ulti-ex_site_H_LCMS_config_neat_plasma_report.tsv
V250515_053.raw	Extended_analysis_neat_plasma	Neat_plasma	L	DIA	ulti-ex_site_H_LCMS_config	2	DIANN	L_ulti-ex_site_H_LCMS_config_neat_plasma_report.tsv
V250515_054.raw	Extended_analysis_neat_plasma	Neat_plasma	L	DIA	ulti-ex_site_H_LCMS_config	3	DIANN	L_ulti-ex_site_H_LCMS_config_neat_plasma_report.tsv
V250515_055.raw	Extended_analysis_neat_plasma	Neat_plasma	L	DIA	ulti-ex_site_H_LCMS_config	4	DIANN	L_ulti-ex_site_H_LCMS_config_neat_plasma_report.tsv
V250515_056.raw	Extended_analysis_neat_plasma	Neat_plasma	L	DIA	ulti-ex_site_H_LCMS_config	5	DIANN	L_ulti-ex_site_H_LCMS_config_neat_plasma_report.tsv
V250515_057.raw	Extended_analysis_neat_plasma	Neat_plasma	L	DIA	ulti-ex_site_H_LCMS_config	6	DIANN	L_ulti-ex_site_H_LCMS_config_neat_plasma_report.tsv
